# Supplementary material for: Tuning the emission properties of luminescent 1,2,3-diazaborinates
Source: Royal Society of Chemistry journal article supplement (doi:10.1039/d5sc03814f), 2025-01-01
Supplement: d5sc03814f1.pdf [file d5sc03814f1.pdf]

Electronic Supporting Information for

## Tuning the emission properties of luminescent 1,2,3-diazaborinates

Leonie Wüst,<sup>[ab]†</sup> Johannes Chorbacher,<sup>[ab]†</sup> Timo Keim,<sup>[ab]</sup> Tim Wellnitz,<sup>[ab]</sup> Julian Spieß,<sup>[ab]</sup> Nele Wieprecht,<sup>[ab]</sup> Maximilian Michel,<sup>[ab]</sup> Holger Helten<sup>[ab]†</sup> and Holger Braunschweig<sup>[ab]†</sup>

- [a] Institute for Inorganic Chemistry, Julius-Maximilians-Universität Würzburg, Am Hubland, 97074 Würzburg, Germany
- [b] Institute for Sustainable Chemistry & Catalysis with Boron, Julius-Maximilians-Universität Würzburg, Am Hubland, 97074 Würzburg, Germany

**E-mail:** *h.braunschweig@uni-wuerzburg.de*

**E-mail:** *holger.helten@uni-wuerzburg.de*

<sup>†</sup> These authors contributed equally to this work.

## Table of contents

|          |                                                                                                                 |            |
|----------|-----------------------------------------------------------------------------------------------------------------|------------|
| <b>1</b> | <b>Experimental details .....</b>                                                                               | <b>3</b>   |
| <b>2</b> | <b>Syntheses and characterization of compounds .....</b>                                                        | <b>7</b>   |
|          | 3-(2,6-Dimethylphenyl)-4-hydroxy-4,3-borazaroisoquinoline ( <b>2OH</b> ) .....                                  | 7          |
|          | 3-(2,6-Dimethylphenyl)-4-(trimethylsilyloxy)-4,3-borazaroisoquinoline ( <b>2OTMS</b> ) .....                    | 11         |
|          | 3-Hydroxy-4-phenyl-3,4-borazarothieno[3,2- <i>d</i> ]pyridine ( <b>3OH</b> ) .....                              | 15         |
|          | 3-Phenyl-4-(trimethylsiloxy)-3,4-borazarothieno[3,2- <i>d</i> ]pyridine ( <b>3OTMS</b> ) .....                  | 19         |
|          | 3,4-Bis(phenyl)-3,4-borazarothieno[3,2- <i>d</i> ]pyridine ( <b>3Ph</b> ) .....                                 | 23         |
|          | 1-Methyl-3-phenyl-4-hydroxy-4,3-borazaroisoquinoline ( <b>4OH</b> ) .....                                       | 27         |
|          | 1-Methyl-3-phenyl-4-(trimethylsilyloxy)-4,3-borazaroisoquinoline ( <b>4OTMS</b> ) .....                         | 31         |
|          | Tetra( <i>n</i> -butyl)ammonium 3-(phenyl)-4-bis(fluoro)-4,3-borazaroisoquinolate ( <b>5F[TBA]</b> ) .....      | 35         |
|          | Lithium 3-phenyl-4-bis(methyl)-4,3-borazaroisoquinolate ( <b>5Me[Li]</b> ) .....                                | 40         |
|          | Lithium 3-phenyl-4-bis(thienyl)-4,3-borazaroisoquinolate ( <b>5Thio[Li]</b> ) .....                             | 44         |
|          | Lithium 3-phenyl-4-bis(4-(trifluoromethyl)phenyl)-4,3-borazaroisoquinolate ( <b>5CF<sub>3</sub>[Li]</b> ) ..... | 49         |
|          | Lithium 3-phenyl-4-bis(4-(methoxy)phenyl)-4,3-borazaroisoquinolate ( <b>5OMe[Li]</b> ) .....                    | 54         |
|          | Lithium 3-phenyl-4-(2,2'-biphenyl)-4,3-borazaroisoquinolate ( <b>5Biph[Li]</b> ) .....                          | 59         |
|          | Lithium 3-phenyl-4-bis(4-(9H-carbazol-9-yl)phenyl)-4,3-borazaroisoquinolate ( <b>5Cbz[Li]</b> ) .....           | 64         |
|          | 2-Methyl-3,4-bis(phenyl)-4,3-borazaroisoquinoline ( <b>5Ph[Me]</b> ) .....                                      | 69         |
|          | Lithium 1-Methyl-3-phenyl-4-bis(phenyl)-4,3-borazaroisoquinolate ( <b>6Ph[Li]</b> ) .....                       | 73         |
|          | Lithium 3-phenyl-4-bis(phenyl)-4,3-borazarothieno[3,2- <i>c</i> ]pyridinate ( <b>7Ph[Li]</b> ) .....            | 78         |
|          | Lithium 1-Methyl-3-phenyl-4-bis(phenyl)-4,3-borazaroisoquinolate ( <b>8Ph[Li]</b> ) .....                       | 82         |
|          | Tetra( <i>n</i> -butyl)ammonium 1-Methyl-3-phenyl-4-bis(phenyl)-4,3-borazaroisoquinolate ( <b>8Ph[TBA]</b> ) .. | 86         |
|          | Appendix .....                                                                                                  | 90         |
| <b>3</b> | <b>Spectroscopic details.....</b>                                                                               | <b>95</b>  |
| <b>4</b> | <b>Computational details.....</b>                                                                               | <b>126</b> |
|          | Rotational barriers .....                                                                                       | 127        |
|          | Calculated UV-Vis spectra .....                                                                                 | 128        |
|          | Mulliken- and NBO-charges .....                                                                                 | 128        |
|          | Frontier molecular orbitals .....                                                                               | 129        |
|          | Electron excitation analysis .....                                                                              | 135        |
|          | Optimized structures (.xyz-files) .....                                                                         | 137        |
| <b>5</b> | <b>References .....</b>                                                                                         | <b>156</b> |

## 1 Experimental details

**General Information.** Unless stated otherwise, all manipulations were performed under oxygen- and moisture free conditions under an inert atmosphere of argon using standard Schlenk techniques or an inert atmosphere glovebox (*VIGOR SG1200/750TS-F*). All glassware was heated three times *in vacuo* using a heat gun and cooled under argon atmosphere. Solvents were transferred using syringes, steel or PE cannulas, which were purged with argon prior to use. Solvents and reactants were either obtained from commercial sources or synthesized as detailed in **Table S1**. Deuterated solvents were dried over molecular sieves and degassed by three freeze-pump-thaw cycles prior to use. All other solvents were distilled and degassed from appropriate drying agents. Both deuterated and non-deuterated solvents were stored under argon over activated 4 Å or 3 Å (DCM) molecular sieves.

**Liquid-phase NMR spectra.** NMR spectra were acquired on a *BRUKER AVANCE 400*, *BRUKER AVANCE 500* or *BRUKER AVANCE NEO 600* spectrometer and analyzed using the associated *TOPSPIN 4.1.1<sup>TM</sup>*. Chemical shifts ( $\delta$ ) are reported in ppm and internally referenced to the carbon nuclei ( $^{13}\text{C}\{^1\text{H}\}$ ):  $\delta_{\text{ref}}(\text{DMSO-}d_6) = 39.52$  ppm;  $\delta_{\text{ref}}(\text{C}_6\text{D}_6) = 128.06$  ppm;  $\delta_{\text{ref}}(\text{THF-}d_8) = 67.21$  ppm, 25.31 ppm,  $\delta_{\text{ref}}(\text{CD}_2\text{Cl}_2) = 53.84$  ppm) or residual protons ( $^1\text{H}$ :  $\delta_{\text{ref}}(\text{DMSO-}d_6) = 2.50$  ppm;  $\delta_{\text{ref}}(\text{C}_6\text{D}_6) = 7.16$  ppm;  $\delta_{\text{ref}}(\text{THF-}d_8) = 3.58$  ppm, 1.72 ppm,  $\delta_{\text{ref}}(\text{CD}_2\text{Cl}_2) = 5.32$  ppm) of the solvent.<sup>1</sup>  $\text{SiMe}_4$  was used as an external standard for  $^1\text{H}$  and  $^{13}\text{C}$  NMR spectra. Heteronuclei NMR spectra are referenced to external standards ( $^7\text{Li}$ :  $\text{LiCl}$ ;  $^{11}\text{B}$ :  $\text{BF}_3 \cdot \text{OEt}_2$ ;  $^{19}\text{F}$ :  $\text{CFCl}_3$ ). All NMR spectroscopy measurements were carried out at room temperature (296 K). Resonances are given as singlet (s), doublet (d), sextet (sext), doublet of doublet of doublets (ddd), doublet of triplet (dt), triplet (t), triplet of doublets (td), quartet (q), quintet (quint), multiplet (m) or broad singlet (br s). The spectra were plotted using the MestReNova program.

**Mass spectra.** High-resolution mass spectrometry was performed on a *THERMO SCIENTIFIC* mass spectrometer (Exacte Plus Spectrometer) using a *LIFDI 700* unit from LINDEN CMS source or with an *Atmospheric Pressure Chemical Ionization (APCI)* / *Atmospheric Solids Analysis Probe (ASAP)* / *Electron Spray Ionization (ESI)* source. Spectra were processed using the Qual Browser of the XCalibur software. The figures show the total spectrum in the upper part, the product peak with isotope distribution in the middle and a corresponding simulation in the lower part.

**Single crystal structure analyses.** Single crystals suitable for X-ray diffraction analysis were coated with perfluorinated polyether oil in a glovebox, transferred to a nylon loop, and then to the goniometer of a diffractometer. The crystal data were collected on a *RIGAKU XtaLAB SYNERGY-R* diffractometer with HPA area detector and multilayer mirror monochromator using  $\text{CuK}_\alpha$  radiation ( $\lambda = 1.54178$  Å). The

structures were solved using the intrinsic phasing method (*ShelXT*),<sup>2</sup> expanded Fourier expansion, and refined using the *SHELXL* software package.<sup>3</sup> All non-hydrogen atoms were anisotropically refined, and the hydrogen atoms were included in the structure factor calculation at idealized positions. The images of the solid-state structures were created using the *Pov-Ray*<sup>TM</sup> and *Mercury 2023.1.0* software. Important data and parameters of the compounds can be found in the synthesis and characterization of compounds section.

**UV-vis and fluorescence spectra.** All photophysical measurements were performed in standard quartz cuvettes (1 cm × 1 cm cross-section) under inert atmosphere. UV-visible absorption spectra were recorded using an *AGILENT 8453* diode array UV-visible spectrophotometer and a *METTLER TOLEDO UV7* spectrophotometer. The emission spectra were recorded using an *EDINBURGH INSTRUMENTS FLSP920* spectrometer equipped with a double monochromator for both excitation and emission, operating in right-angle geometry mode, and all spectra were fully corrected for the spectral response of the instrument. The fluorescence quantum yields of solutions were measured using a calibrated integrating sphere (inner diameter: 150 mm) from *EDINBURGH INSTRUMENTS* combined with the *FLSP920* spectrometer described above. Thin PMMA-films were prepared from a solution of 60 mg poly(methyl methacrylate) (PMMA) and 0.25 mg of the compounds in 1.0 mL THF by slow evaporation on the side of the cuvettes under inert conditions.

**Photostability tests.** The photostability of selected DABates was tested by irradiating THF solutions and powder samples of the respective DABate with a UV lamp (254 nm and 365 nm) for a time period of 3 h and measuring UV-vis spectra at t = 0 h and t = 3 h.



**Table S1.** Origin and purification of solvents and reactants.

| Substance                                                          | Origin                   | Purity / Purification                                                                                   |
|--------------------------------------------------------------------|--------------------------|---------------------------------------------------------------------------------------------------------|
| 2-Formylphenylboronic acid<br>[40138-16-7]                         | BLD<br>Pharmatech®       | 99.97% / none<br>stored under Ar                                                                        |
| Phenylhydrazine<br>[100-63-1]                                      | Sigma Aldrich®           | ≥97% / none<br>stored under Ar                                                                          |
| <i>N,O</i> -Bis(trimethylsilyl)acetamide<br>[10416-59-8]           | Sigma Aldrich®           | ≥95% / none<br>stored under Ar                                                                          |
| <i>n</i> -Butyllithium (1.6 M, <i>n</i> -hexane)<br>[109-72-8]     | Sigma Aldrich®           | - / none<br>stored under Ar                                                                             |
| Methylithium (1.6 M, Et <sub>2</sub> O)<br>[917-54-4]              | Sigma Aldrich®           | - / none<br>dried <i>in vacuo</i> , stored under Ar<br>and used as solid                                |
| (2-Formylthiophen-3-yl)boronic acid<br>[4347-31-3]                 | BLD<br>Pharmatech®       | 97% / none<br>stored under Ar                                                                           |
| 2-Thienyllithium<br>[2786-07-4]                                    | synthesized <sup>4</sup> | -                                                                                                       |
| 9-(4-Bromophenyl)-9 <i>H</i> -carbazole<br>[57102-42-8]            | BLD<br>Pharmatech®       | 99.83% / none                                                                                           |
| 2,2'-Dibromobiphenyl<br>[13029-09-9]                               | Activate<br>Scientific®  | 98% / none                                                                                              |
| 18-Crown-6<br>[17455-13-9]                                         | Sigma Aldrich®           | ≥99.0% / none<br>dried in C <sub>6</sub> H <sub>6</sub> over MS, then <i>in vacuo</i> , stored under Ar |
| 4-Bromobenzotrifluoride<br>[402-43-7]                              | Abcr GmbH®               | 99% / none                                                                                              |
| 4-Bromoanisole<br>[104-92-7]                                       | ACROS<br>Organics®       | 98% / none                                                                                              |
| Tetra- <i>n</i> -butylammonium fluoride (1.0 M, THF)<br>[429-41-4] | Sigma Aldrich®           | ≥95.0% / none<br>stored under Ar                                                                        |
| Tetra- <i>n</i> -butylammonium chloride<br>[1112-67-0]             | Sigma Aldrich®           | dried at 85 °C (high vacuum,<br>hours), stored under Ar                                                 |
| Methyl trifluoromethanesulfonate<br>[333-27-7]                     | Sigma Aldrich®           | ≥98% / none<br>stored under Ar                                                                          |
| Bromobenzene<br>[108-86-1]                                         | Sigma Aldrich®           | ≥99.5% / dried over MS,<br>stored under Ar                                                              |
| Phenylmagnesium bromide (3.0 M, Et <sub>2</sub> O)<br>[100-58-3]   | Sigma Aldrich®           | - / none<br>stored under Ar                                                                             |

|                                                                                          |                    |                                                                                                               |
|------------------------------------------------------------------------------------------|--------------------|---------------------------------------------------------------------------------------------------------------|
| (2,6-Dimethylphenyl)hydrazine hydrochloride<br>[2538-61-6]                               | BLD<br>Pharmatech® | 97% / none                                                                                                    |
| 2-Acetylphenylboronic acid<br>[308103-40-4]                                              | fluorochem®        | 97% / none                                                                                                    |
| Acetonitrile<br>[75-05-8]                                                                | local trade        | Purified and dried over local solvent purification system (SPS), stored under Ar over molecular sieves (3 Å). |
| Dichloromethane<br>[71-43-2]                                                             | local trade        | Purified and dried over local solvent purification system (SPS), stored under Ar over molecular sieves (3 Å). |
| Benzene<br>[71-43-2]                                                                     | local trade        |                                                                                                               |
| Toluene<br>[108-88-3]                                                                    | local trade        |                                                                                                               |
| <i>n</i> -Pentane<br>[109-66-0]                                                          | local trade        | dried over Na, freshly distilled prior to use, stored under Ar over molecular sieves (4 Å).                   |
| Diethyl ether (Et <sub>2</sub> O)<br>[60-29-7]                                           | local trade        |                                                                                                               |
| Tetrahydrofuran (THF)<br>[109-99-9]                                                      | local trade        |                                                                                                               |
| Benzene- <i>d</i> <sub>6</sub> (C <sub>6</sub> D <sub>6</sub> )<br>[1076-43-3]           | Sigma Aldrich®     | 99.6 atom % D / none stored under Ar over molecular sieves.                                                   |
| Dimethylsulfoxide- <i>d</i> <sub>6</sub> (DMSO- <i>d</i> <sub>6</sub> )<br>[2206-27-1]   | Sigma Aldrich®     | 99.5 atom % D / none                                                                                          |
| Tetrahydrofurane- <i>d</i> <sub>8</sub> (THF- <i>d</i> <sub>8</sub> )<br>[1693-74-9]     | Sigma Aldrich®     | ≥99.5 atom % D / none stored under Ar over molecular sieves.                                                  |
| Dichloromethane- <i>d</i> <sub>2</sub> (CD <sub>2</sub> Cl <sub>2</sub> )<br>[1665-00-5] | Sigma Aldrich®     | 99.5 atom % D / none                                                                                          |

## 2 Syntheses and characterization of compounds

Compounds **1OH**, **1OTMS**, **[Li]5Ph** and **[TBA]5Ph** were prepared following a procedure previously described by Gois and coworkers or our groups.<sup>5, 6</sup>

### 3-(2,6-Dimethylphenyl)-4-hydroxy-4,3-borazaroisoquinoline (**2OH**)

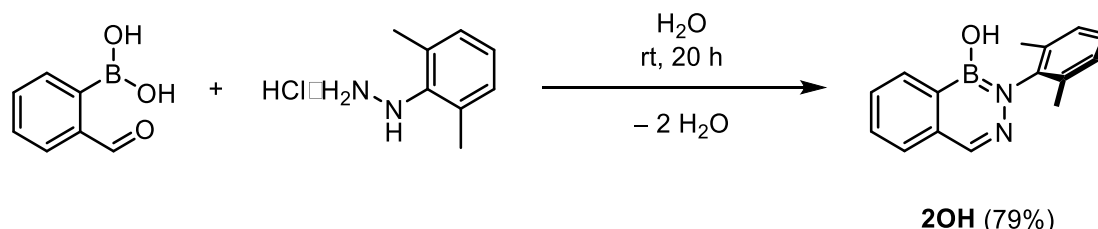

Open to the atmosphere, 2-formylphenylboronic acid (3.00 g, 20.0 mmol, 1.00 eq.) was suspended in distilled water (250 mL) in a 500 mL round bottom flask with a dumbbell stirring bar and stirred until total dissolution (approx. 10 min). (2,6-Dimethylphenyl)hydrazine hydrochloride (3.45 g, 20.0 mmol, 1.00 eq.) was added under rapid stirring at ambient temperature, which resulted in the immediate formation of an off-white precipitate. Optionally, a few milliliters (~5 mL) of NaHCO<sub>3</sub> solution can be added to ensure complete precipitation of the product. After stirring for 20 h, the solid was filtered off and washed with distilled water (2 × 50 mL). The filter cake was dried in suction vacuum, and the obtained off-white powder was additionally dried in a vacuum desiccator (orange gel) until a consistent weight was achieved. **Yield of 2OH:** 3.97 g (15.9 mmol, 79%) of an off-white powder. The compound is air- and moisture-stable.

**<sup>1</sup>H NMR** (500 MHz, 298 K, DMSO-*d*<sub>6</sub>): δ = 8.47 (s, 1H, B-OH), 8.38 (d, <sup>3</sup>*J*<sub>HH</sub> = 7.64 Hz, 1H, *H*-3), 8.18 (s, 1H, *H*-1), 7.82 (d, <sup>3</sup>*J*<sub>HH</sub> = 7.68 Hz, *H*-6), 7.77 (dt, <sup>3</sup>*J*<sub>HH</sub> = 7.15 Hz, <sup>4</sup>*J*<sub>HH</sub> = 1.29 Hz, 1H, *H*-5), 7.66 (dt, <sup>3</sup>*J*<sub>HH</sub> = 7.27 Hz, <sup>4</sup>*J*<sub>HH</sub> = 1.28 Hz, 1H, *H*-4), 7.14-7.15 (m, 3H, *H*-10 + *H*-11), 2.02 (s, 6H, -CH<sub>3</sub>) ppm. **<sup>11</sup>B NMR** (160 MHz, 298 K, DMSO-*d*<sub>6</sub>) δ = 27.4 (br s) ppm.

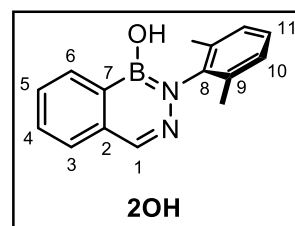

**<sup>13</sup>C{<sup>1</sup>H<sup>11</sup>B} NMR** (151 MHz, 298 K, DMSO-*d*<sub>6</sub>): δ = 143.7 (C<sub>q</sub><sup>N</sup>-8), 139.0 (C-1), 135.5 (C<sub>q</sub>-2), 134.8 (C<sub>q</sub>-9), 131.5 (C-3), 131.2 (C-5), 129.9 (C<sub>q</sub><sup>B</sup>-7), 128.8 (C-4), 127.9 (C-10), 127.0 (C-6), 126.7 (C-11) ppm.

**HRMS** (ASAP<sub>pos</sub>, toluene): expected: *m/z* 250.1387, 251.1350, 252.1384 [C<sub>15</sub>H<sub>15</sub>BN<sub>2</sub>O+H]<sup>+</sup>; found: *m/z* 250.1383, 251.1345, 252.1378 [C<sub>15</sub>H<sub>15</sub>BN<sub>2</sub>O+H]<sup>+</sup>. Crystalline material of **2OH** as colorless plates for single-crystal XRD was obtained by storing a saturated diethyl ether solution at -20 °C for several days.

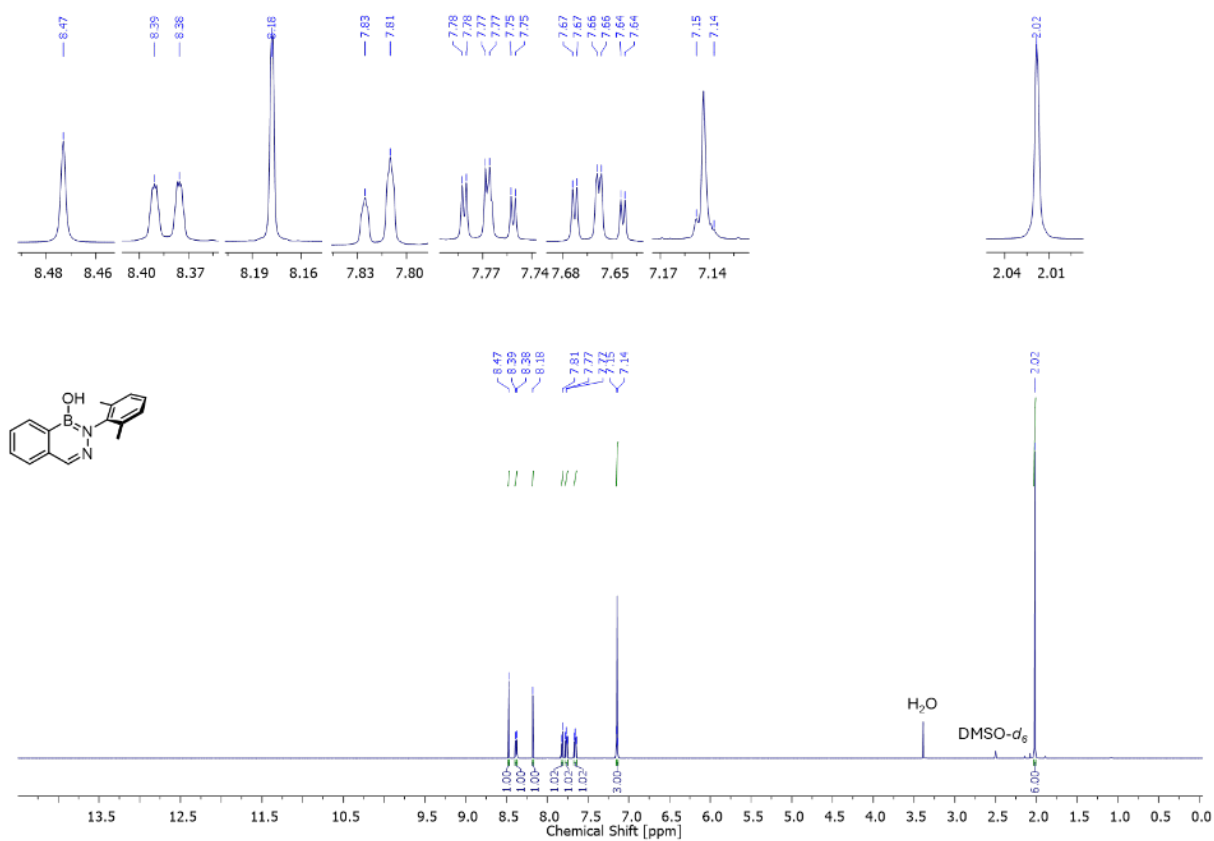

**Fig. S1** <sup>1</sup>H NMR spectrum of compound **2OH** in DMSO-*d*<sub>6</sub>.

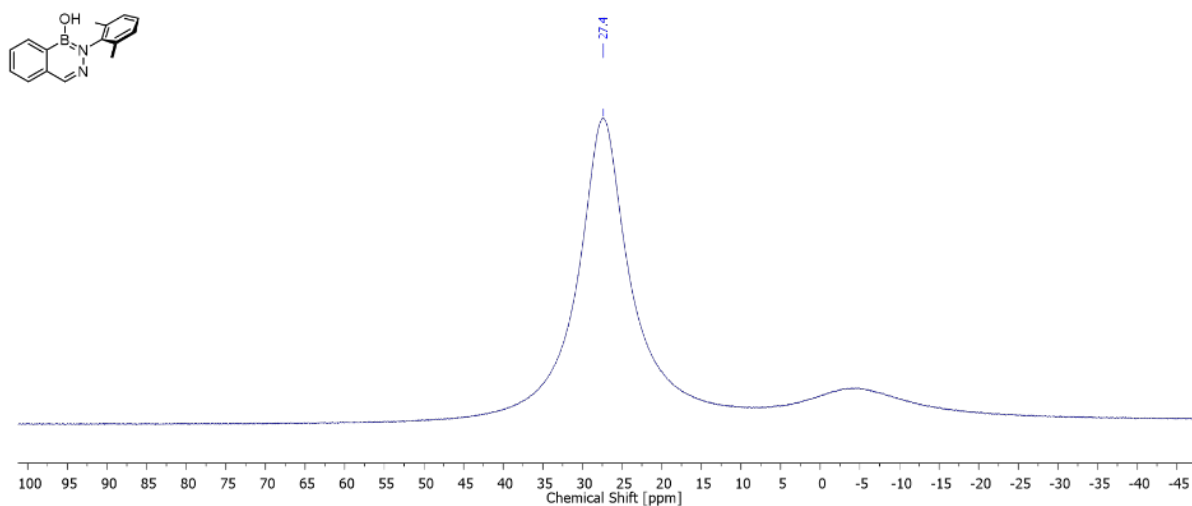

**Fig. S2** Background-reduced <sup>11</sup>B NMR spectrum of compound **2OH** in DMSO-*d*<sub>6</sub>.

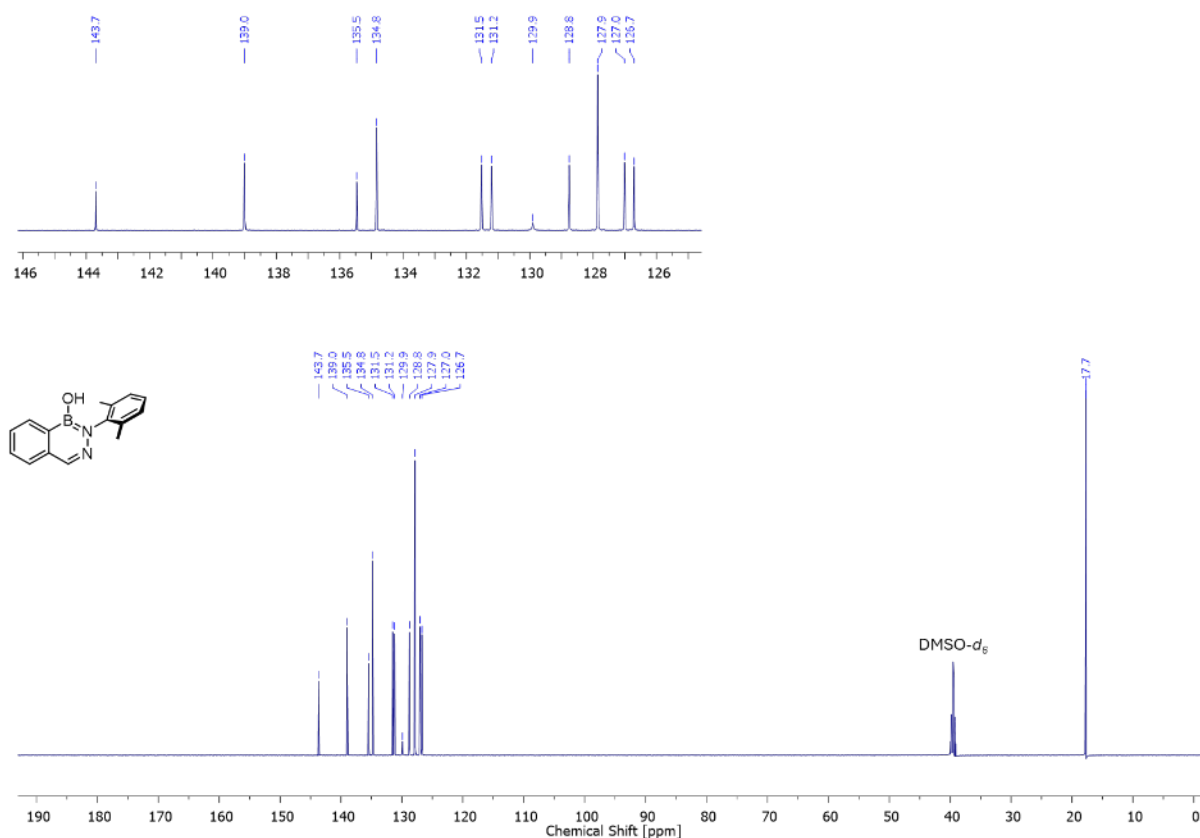

**Fig. S3** <sup>13</sup>C{<sup>1</sup>H<sup>11</sup>B} NMR spectrum of compound 2OH in DMSO-*d*<sub>6</sub> (<sup>11</sup>B decoupled at 28 ppm).

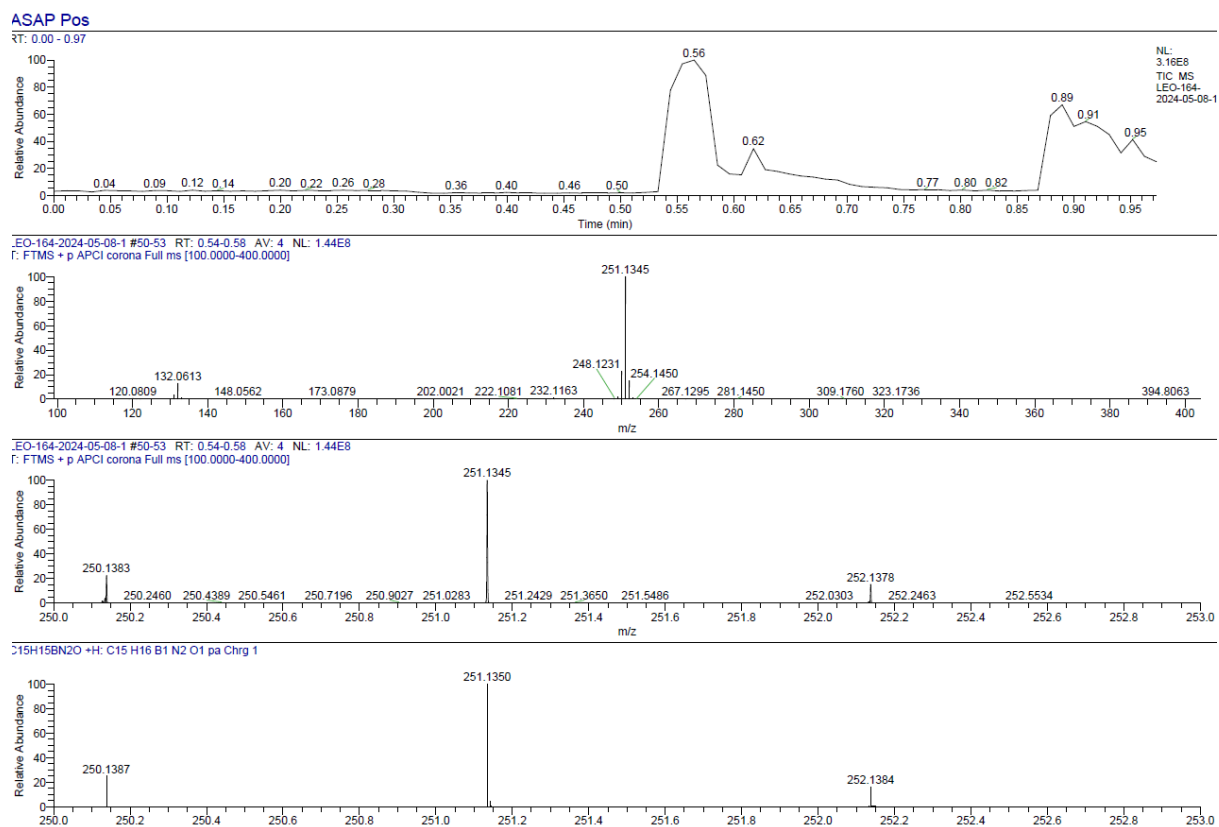

**Fig. S4** ASAP<sub>pos</sub> mass spectrum of compound 2OH (toluene).

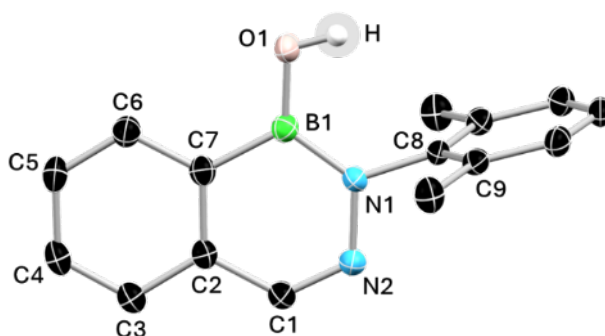

**Fig. S5**

Molecular structure of compound **2OH**. Ellipsoids drawn at 50% probability (100 K). All H-atoms except for the borinic acid omitted. Selected bond lengths (Å) and angles (°) of **2OH**: B1–N1 1.4285(19), N1–N2 1.3941(16), N2–C1 1.2955(17), C1–C2 1.4450(19), C2–C3 1.4077(19), C3–C4 1.377(2), C4–C5 1.400(2), C5–C6 1.386(2), C6–C7 1.406(2), C2–C7 1.402(2), C7–B1 1.5476(19), B1–O1 1.3532(19), N1–C8 1.4425(16), B1–N1–N2–C1 0.8(2), N2–N1–C8–C9 90.97(14).

Crystal data:  $C_{15}H_{15}BN_2O$ ,  $M_r = 250.10$ , clear colorless plate,  $0.240 \times 0.090 \times 0.050 \text{ mm}^3$ , monoclinic space group  $P2_1/n$ ,  $a = 11.0957(2) \text{ Å}$ ,  $b = 10.40610(10) \text{ Å}$ ,  $c = 12.2828(2) \text{ Å}$ ,  $\beta = 107.670(2)^\circ$ ,  $V = 1351.30(4) \text{ Å}^3$ ,  $Z = 4$ ,  $\rho_{\text{calc}} = 1.229 \text{ g}\cdot\text{cm}^{-3}$ ,  $m = 0.607 \text{ mm}^{-1}$ ,  $F(000) = 528$ ,  $T = 100(2) \text{ K}$ ,  $R_1 = 0.0533$ ,  $wR_2 = 0.1139$ , 2702 independent reflections [ $2\theta \leq 147.662^\circ$ ] and 176 parameters.

CCDC number: 2453532

### 3-(2,6-Dimethylphenyl)-4-(trimethylsilyloxy)-4,3-borazaroisoquinoline (**2OTMS**)

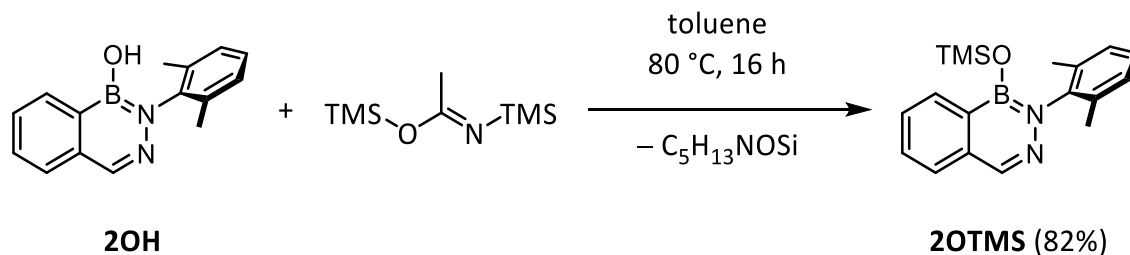

DAB **2OH** (3.00 g, 12.0 mmol, 1.00 eq.) was dissolved in toluene (100 mL) in a 200 mL Schlenk tube. Under rapid stirring, *N,O*-bis(trimethylsilyl)acetamide (24.3 mL, 98.4 mmol, xs.,  $\rho = 0.83$  g/mL) was added at ambient temperature. After stirring for 1 min, a clear, orange solution was obtained. The reaction suspension was heated to 80 °C for 16 h. All volatile components were removed *in vacuo* with an external cooling trap. For the removal of the byproduct *N*-(trimethylsilyl)acetamide *via* sublimation, the obtained yellow oil was heated to 80 °C at  $1.2 \cdot 10^{-2}$  mbar. The remaining orange oil was extracted with *n*-pentane ( $3 \times 25$  mL) via filter cannulation. The remaining solid, consisting of the **2-O-2** anhydride was discarded and all volatile components of the filtrate were removed *in vacuo*. Compound **2OTMS** was obtained as an orange oil. After storing the pure oil at –30 °C in a glovebox for several weeks, the oil started crystalizing. **Yield of 2OTMS:** 3.18 g, 9.87 mmol, 82%, orange oil.

**$^1\text{H}$  NMR** (600 MHz, 298 K,  $\text{C}_6\text{D}_6$ ):  $\delta = 8.17\text{--}8.21$  (m, 2H, *H*-1+*H*-3), 7.35–7.40 (m, 2H, *H*-4+*H*-5), 7.31–7.34 (m, 1H, *H*-6), 7.04–7.06 (m, 1H, *H*-11), 7.00–7.03 (m, 2H, *H*-10), 2.13 (s, 6H, xyl- $\text{CH}_3$ ), 0.04 (s, 9H,  $-\text{Si}(\text{CH}_3)_3$ ) ppm.

**$^{11}\text{B}\{^1\text{H}\}$  NMR** (128 MHz, 298 K,  $\text{C}_6\text{D}_6$ )  $\delta = 26.0$  (br s) ppm.  **$^{13}\text{C}\{^1\text{H}^{11}\text{B}\}$  NMR** (151 MHz, 298 K,  $\text{C}_6\text{D}_6$ ):  $\delta = 144.6$  ( $\text{C}_q^{\text{N-8}}$ ), 140.5 (*C*-1), 137.0 ( $\text{C}_q^{\text{-2}}$ ), 135.9

( $\text{C}_q^{\text{-9}}$ ), 132.5 ( $\text{C}_q^{\text{-7}}$ ), 131.8 (*C*-3), 131.4 (*C*-4), 128.9 (*C*-5), 128.5 (*C*-10), 127.5 (*C*-11), 127.2 (*C*-6), 18.4 (xyl- $\text{CH}_3$ ), 1.4 ( $-\text{Si}(\text{CH}_3)_3$ ) ppm. **HRMS** (ASAP<sub>pos</sub>, toluene): expected:  $m/z$  321.1704, 322.1667, 323.1701 [ $\text{C}_{18}\text{H}_{23}\text{BN}_2\text{OSi}]^+$ ; found:  $m/z$  321.1703, 322.1670, 323.1730 [ $\text{C}_{18}\text{H}_{23}\text{BN}_2\text{OSi}]^+$ . Crystalline material of **2OTMS** as colorless plates for single-crystal XRD was obtained by storing the obtained oil at –30 °C for several weeks.

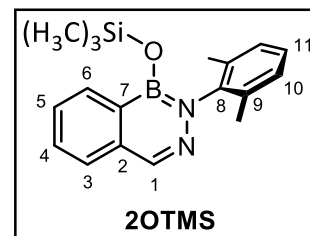

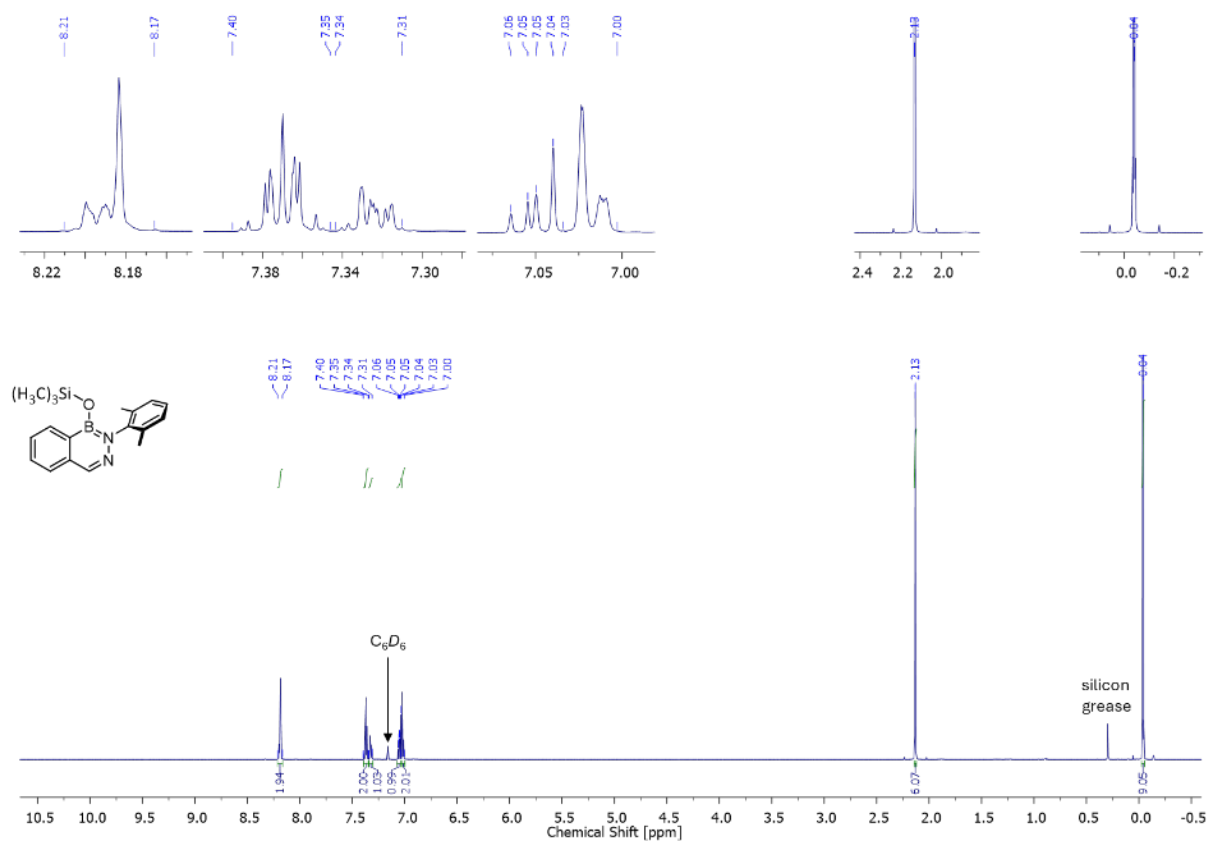

**Fig. S6** <sup>1</sup>H NMR spectrum of compound **2OTMS** in C<sub>6</sub>D<sub>6</sub>.

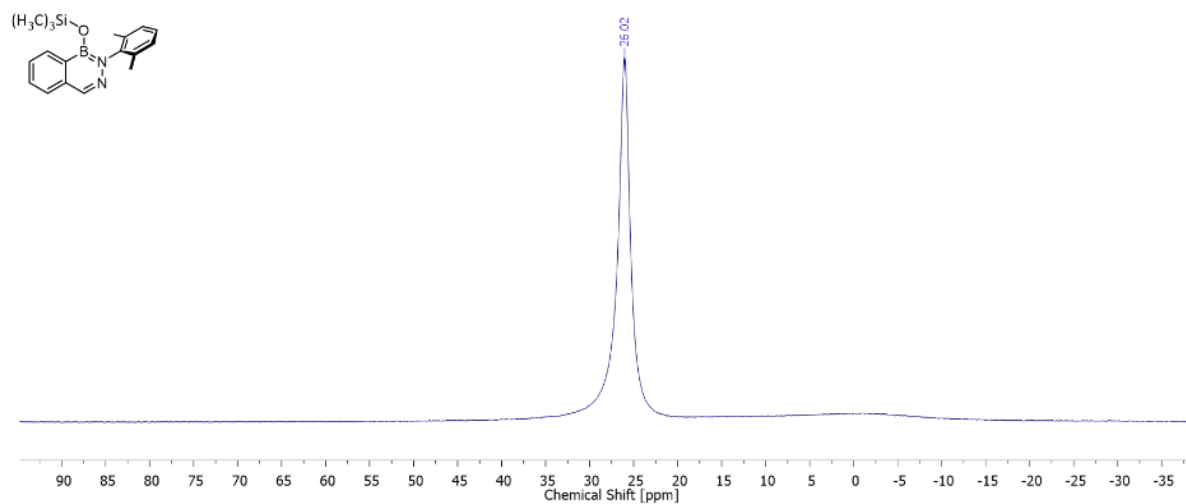

**Fig. S7** Background-reduced <sup>11</sup>B{<sup>1</sup>H} NMR spectrum of compound **2OTMS** in C<sub>6</sub>D<sub>6</sub>.



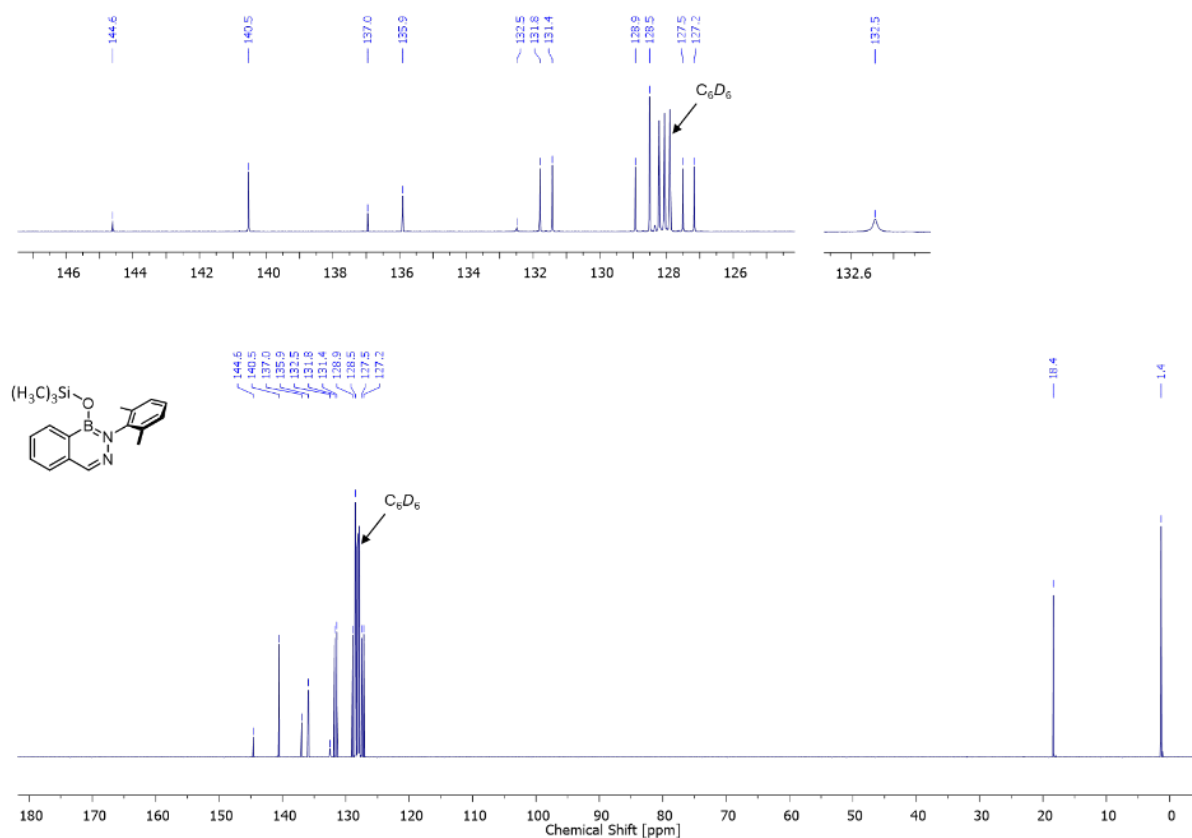

**Fig. S8** <sup>13</sup>C{<sup>1</sup>H<sup>11</sup>B} NMR spectrum of compound **2OTMS** in C<sub>6</sub>D<sub>6</sub> (<sup>11</sup>B decoupled at 26 ppm).

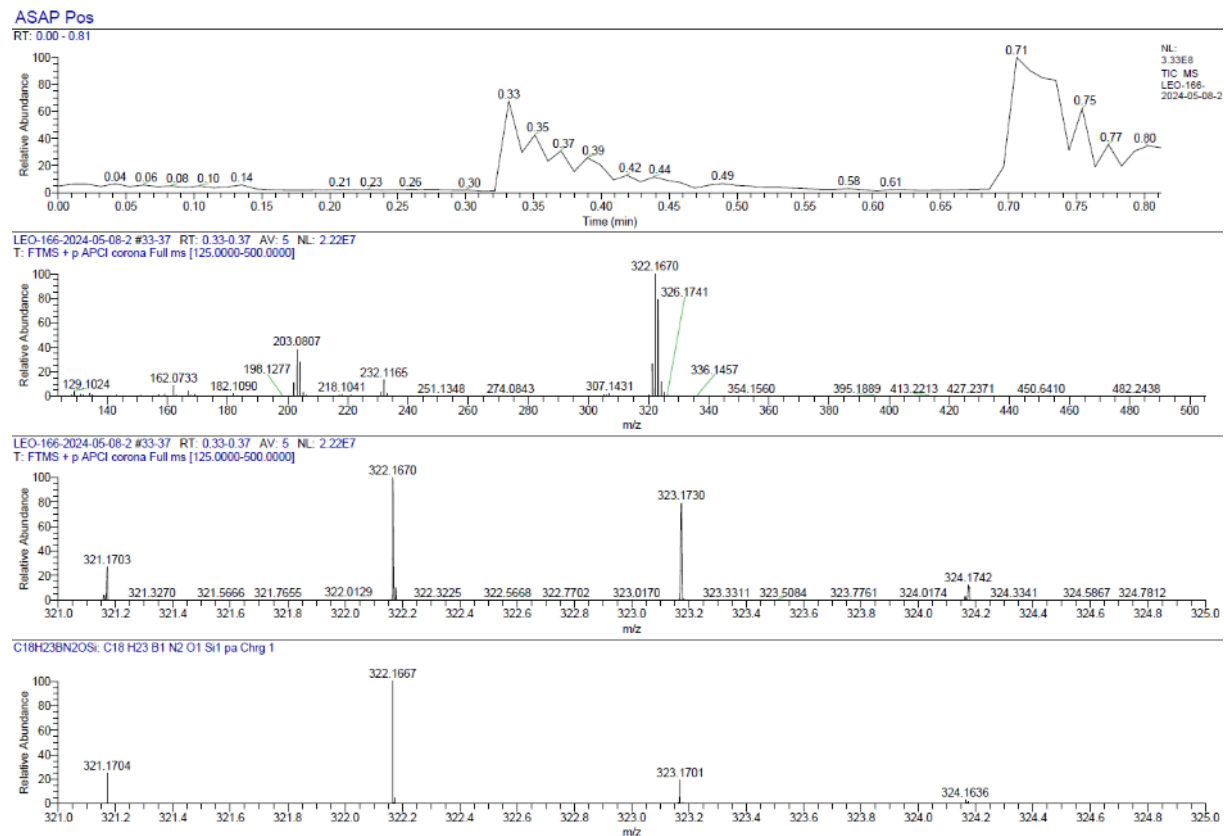

**Fig. S9** ASAP<sub>pos</sub> mass spectrum of compound **2OTMS** (toluene).

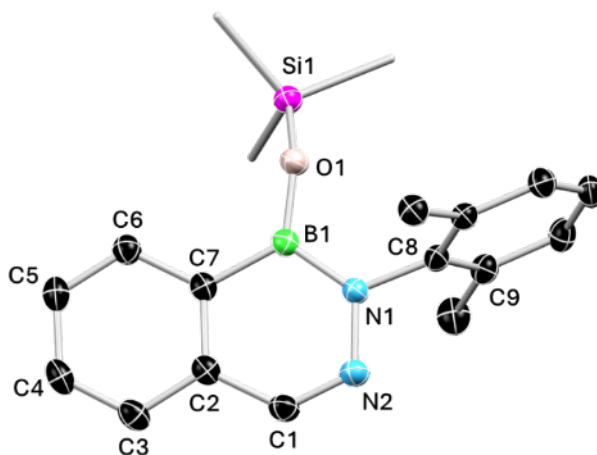

**Fig. S10** Molecular structure of compound **2OTMS**. Ellipsoids drawn at 50% probability (100 K). All H-atoms omitted and methyl groups of the TMS ether shown as wireframe. Selected bond lengths (Å) and angles (°) of **2OTMS**: B1–N1 1.4287(15), N1–N2 1.3891(13), N2–C1 1.2968(15), C1–C2 1.4450(16), C2–C3 1.4065(15), C3–C4 1.3787(17), C4–C5 1.3956(17), C5–C6 1.3861(16), C6–C7 1.4057(16), C2–C7 1.4080(16), C7–B1 1.5414(16), B1–O1 1.3671(14), N1–C8 1.4453(13), B1–N1–N2–C1 0.39(15), N2–N1–C8–C9 80.58(12).

Crystal data:  $C_{18}H_{23}BN_2OSi$ ,  $M_r = 322.28$ , colorless plate,  $0.300 \times 0.260 \times 0.100$  mm<sup>3</sup>, orthorhombic space group *Pbca*,  $a = 13.59130(10)$  Å,  $b = 12.40900(10)$  Å,  $c = 21.75130(10)$  Å,  $V = 3668.45(4)$  Å<sup>3</sup>,  $Z = 8$ ,  $\rho_{\text{calcd}} = 1.167$  g·cm<sup>-3</sup>,  $\mu = 1.155$  mm<sup>-1</sup>,  $F(000) = 1376$ ,  $T = 100(2)$  K,  $R_1 = 0.0343$ ,  $wR_2 = 0.0915$ , 3713 independent reflections [ $2\theta \leq 150.442^\circ$ ] and 213 parameters.

CCDC number: 2453545

### 3-Hydroxy-4-phenyl-3,4-borazarothieno[3,2-*d*]pyridine (**3OH**)

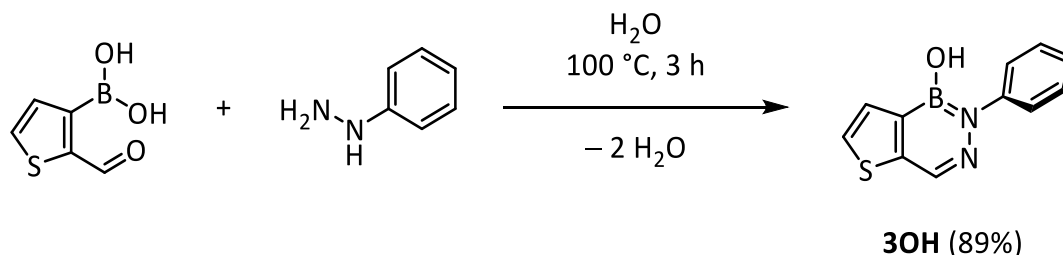

Open to the atmosphere, 2-formyl-3-thiopheneboronic acid (2.05 g, 13.2 mmol, 1.00 eq.) was suspended in distilled water (240 mL) in a 500 mL round bottom flask with a dumbbell stirring bar. The solution was stirred until total dissolution. Phenylhydrazine (1.50 g, 1.36 mL, 13.6 mmol, 1.10 eq.) was added dropwise under rapid stirring at ambient temperature, which resulted in the formation of a yellow precipitate. The round bottom flask was equipped with a reflux condenser and heated at 100 °C for 3 h. The mixture was cooled to ambient temperature and the solid was filtered off and washed with water (2 × 30 mL) and *n*-hexane (2 × 30 mL). The filter cake was dried in suction vacuum and the obtained yellow powder was additionally dissolved in ethyl acetate (20 mL), dried over Na<sub>2</sub>SO<sub>4</sub> and filtered. All volatile components were removed *in vacuo* and compound **3OH** was obtained as a yellow solid. **Yield of 3OH:** 2.66 g (11.7 mmol, 89%), yellow powder. The compound is air- and moisture-stable.

**<sup>1</sup>H NMR** (600 MHz, 298 K, DMSO-*d*<sub>6</sub>): δ = 8.97 (s, 1H, B-OH), 8.37 (s, 1H, *H*-1), 7.86 (d, 1H, <sup>3</sup>*J*<sub>HH</sub> = 4.97 Hz, *H*-3), 7.83 (d, 1H, <sup>3</sup>*J*<sub>HH</sub> = 4.97 Hz, *H*-4), 7.56 (d, 2H, <sup>3</sup>*J*<sub>HH</sub> = 7.47 Hz, *H*-7), 7.40 (t, 2H, <sup>3</sup>*J*<sub>HH</sub> = 8.12 Hz, *H*-8), 7.23 (t, 1H, <sup>3</sup>*J*<sub>HH</sub> = 7.47 Hz, *H*-9) ppm. **<sup>11</sup>B NMR** (161 MHz, 298 K, DMSO-*d*<sub>6</sub>): δ = 27.4 (br s) ppm.

**<sup>13</sup>C{<sup>1</sup>H<sup>11</sup>B} NMR** (151 MHz, DMSO-*d*<sub>6</sub>, 298 K): δ = 146.2 (C<sub>q</sub><sup>N</sup>-6), 145.1 (C<sub>q</sub>-2),

138.3 (C<sub>q</sub><sup>B</sup>-5), 132.7 (C-1), 130.0 (C-4), 129.6 (C-3), 128.2 (C-7), 125.3 (C-8), 125.1 (C-9) ppm. **HRMS** (ASAP<sub>pos</sub>, toluene): expected: *m/z* 228.0638, 229.0601, 230.0635 [C<sub>11</sub>H<sub>9</sub>BN<sub>2</sub>OS+H]<sup>+</sup>; found: *m/z* 228.0634, 229.0598, 230.0631 [C<sub>11</sub>H<sub>9</sub>BN<sub>2</sub>OS+H]<sup>+</sup>. Crystalline material of **3OH** as yellow plates for single-crystal XRD was obtained by slow evaporation of a saturated acetone solution at ambient temperature.

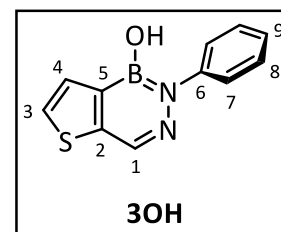

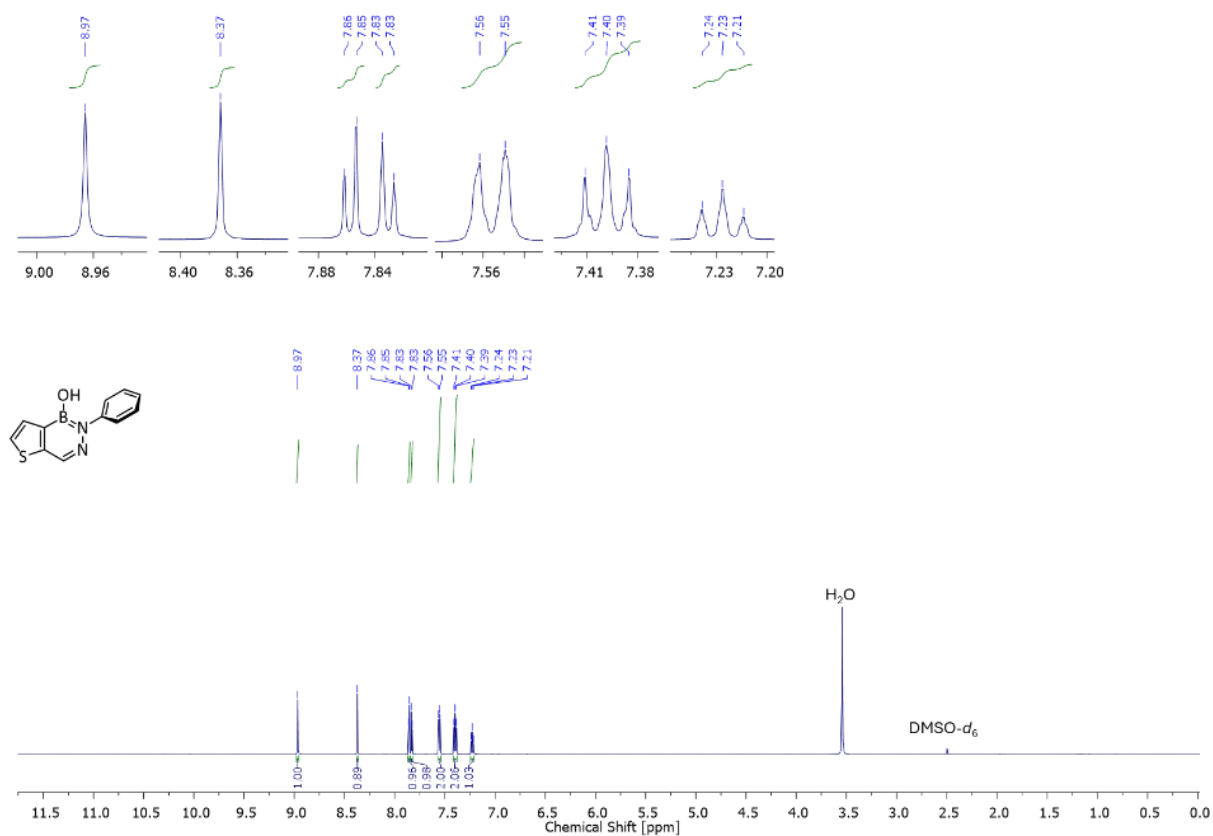

**Fig. S11** <sup>1</sup>H NMR spectrum of compound **3OH** in DMSO-*d*<sub>6</sub>.

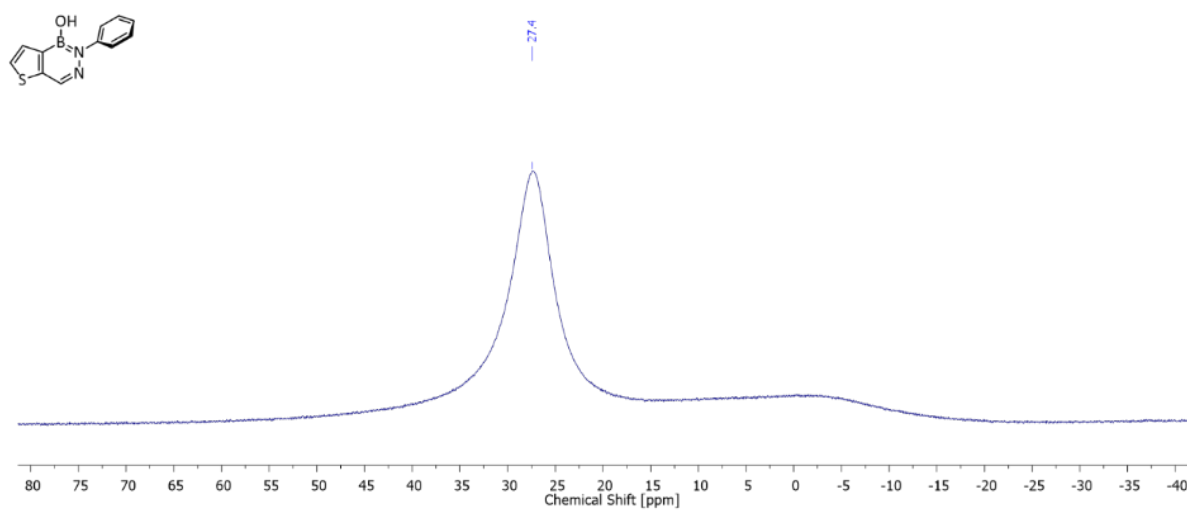

**Fig. S12** Background-reduced <sup>11</sup>B NMR spectrum of compound **3OH** in DMSO-*d*<sub>6</sub>.

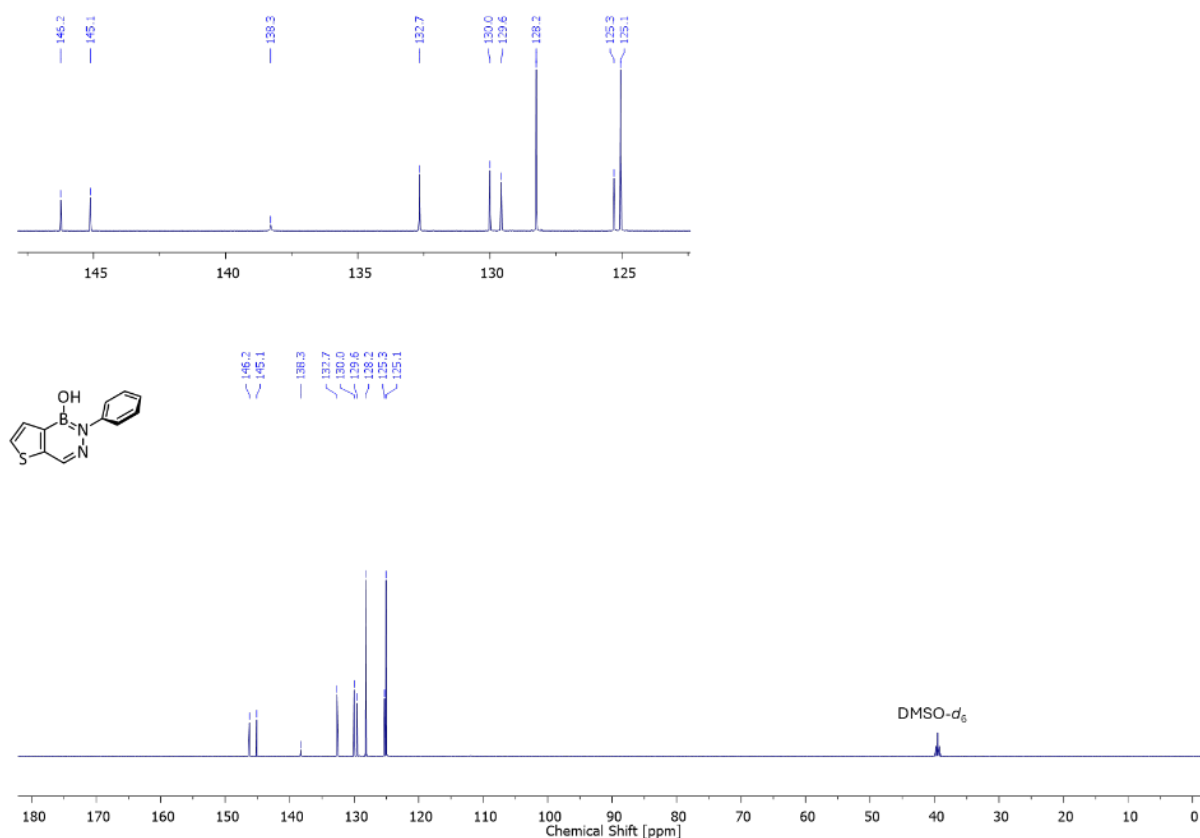

**Fig. S13** <sup>13</sup>C{<sup>1</sup>H<sup>11</sup>B} NMR spectrum of compound **3OH** in DMSO-*d*<sub>6</sub> (<sup>11</sup>B decoupled at 27 ppm).

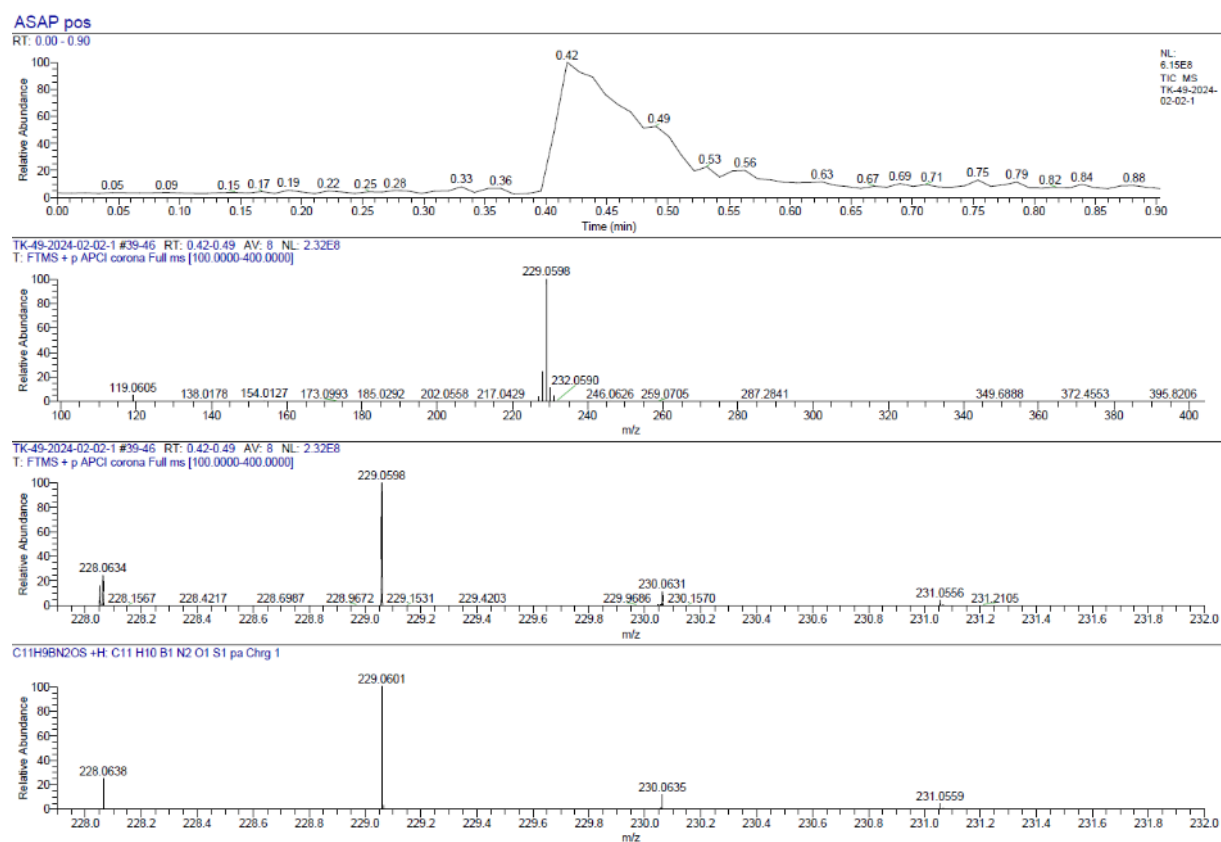

**Fig. S14** ASAP<sub>pos</sub> mass spectrum of compound **3OH** (toluene).

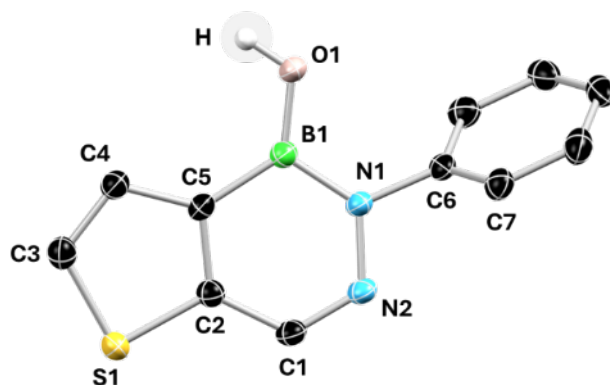

**Fig. S15** Molecular structure of compound **3OH**. Ellipsoids drawn at 50% probability (100 K). All H-atoms except for the borinic acid omitted. Selected bond lengths (Å) and angles (°): B1–N1 1.448(3), N1–N2 1.379(2), N2–C1 1.303(2), C1–C2 1.423(3), C2–S1 1.7272(19), S1–C3 1.714(2), C3–C4 1.363(3), C4–C5 1.428(3), C5–C2 1.383(3), C5–B1 1.541(3), B1–O1 1.356(2), N1–C6 1.443(2), B1–N1–N2–C1 6.3(3), N2–N1–C6–C7 118.74(19).

Crystal data:  $C_{11}H_9BN_2OS$ ,  $M_r = 228.07$ , clear light yellow plate,  $0.270 \times 0.190 \times 0.030$  mm<sup>3</sup>, orthorhombic space group *Pbcn*,  $a = 10.1843(3)$  Å,  $b = 12.2526(4)$  Å,  $c = 17.1356(5)$  Å,  $V = 2138.25(11)$  Å<sup>3</sup>,  $Z = 8$ ,  $\rho_{\text{calcd}} = 1.417$  g·cm<sup>-3</sup>,  $\mu = 2.490$  mm<sup>-1</sup>,  $F(000) = 944$ ,  $T = 100(2)$  K,  $R_1 = 0.0507$ ,  $wR_2 = 0.1316$ , 2135 independent reflections [ $2\theta \leq 147.51^\circ$ ] and 149 parameters. Some reflections were removed from refinement as outliers.

CCDC number: 2453546

### 3-Phenyl-4-(trimethylsiloxy)-3,4-borazathieno[3,2-*d*]pyridine (**3OTMS**)

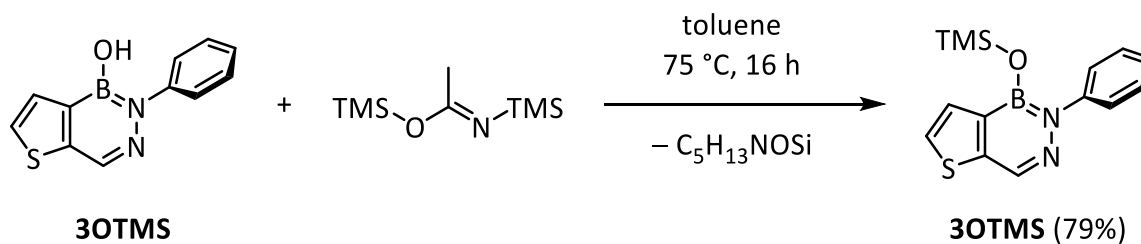

Compound **3OTMS** (2.00 g, 8.77 mmol, 1.00 eq.) was suspended in toluene (200 mL) in a 500 mL Schlenk flask. Under rapid stirring, *N,O*-bis(trimethylsilyl)acetamide (6.43 mL, 26.3 mmol, 3.00 eq.,  $\rho = 0.83$  g/mL) was added. The yellow reaction solution was stirred for 15 min at ambient temperature and then heated to 75 °C for 16 h. All volatile components were removed *in vacuo* with an external cooling trap. For the removal of the byproduct *N*-(trimethylsilyl)acetamide *via* sublimation, the obtained yellow oil was carefully heated with a heat gun at  $1.2 \cdot 10^{-2}$  mbar. Then, the remaining oil was extracted with *n*-pentane ( $3 \times 2$  mL) via filter cannulation and the *n*-pentane solution was stored at -20 °C for 1 d until crystallization of **3OTMS**. The excess solution was removed using a glass pipet and the remaining solid was washed with cold (-20 °C) *n*-pentane (0.5 mL) and dried *in vacuo*. **Yield of 3OTMS:** 2.09 g (6.95 mmol, 79%), off-white, crystalline solid.

**$^1\text{H}$  NMR** (600 MHz, 298 K,  $\text{C}_6\text{D}_6$ ):  $\delta$  = 8.11 (s, 1H, *H*-1), 7.57 (d, 1H,  $^3J_{\text{HH}}$  = 8.37 Hz, *H*-7), 7.38 (d, 1H,  $^3J_{\text{HH}}$  = 4.87 Hz, *H*-4), 7.20 (t, 2H,  $^3J_{\text{HH}}$  = 7.87 Hz,  $^4J_{\text{HH}}$  = 1.77 Hz, *H*-8), 7.05 (t, 1H,  $^3J_{\text{HH}}$  = 7.47 Hz,  $^4J_{\text{HH}}$  = 7.17 Hz, *H*-9), 6.97 (d, 1H,  $^3J_{\text{HH}}$  = 4.97 Hz, *H*-3), 0.04 (s, 9H, -Si(CH<sub>3</sub>)<sub>3</sub>) ppm.  **$^{11}\text{B}\{^1\text{H}\}$  NMR** (193 MHz, 298 K,  $\text{C}_6\text{D}_6$ ):  $\delta$  = 25.4 (br s) ppm.  **$^{13}\text{C}\{^1\text{H}^{11}\text{B}\}$  NMR** (151 MHz, 298 K,  $\text{C}_6\text{D}_6$ ):  $\delta$  = 147.0 (C<sub>q</sub><sup>N</sup>-6), 147.0 (C<sub>q</sub>-2), 140.0 (C<sub>q</sub>-5), 133.3 (C-1), 129.5 (C-4), 128.5 (C-3), 128.4 (C-8), 126.4 (C-7), 126.1 (C-9), 1.5 (-Si(CH<sub>3</sub>)<sub>3</sub>) ppm. **HRMS** (LIFDI, toluene): expected: *m/z* 299.0955, 300.0918, 301.0952 [C<sub>14</sub>H<sub>17</sub>BN<sub>2</sub>OSSi]<sup>+</sup>; found: *m/z* 299.0947, 300.0911, 301.0945 [C<sub>14</sub>H<sub>17</sub>BN<sub>2</sub>OSSi]<sup>+</sup>. Crystalline material of **3OTMS** as colorless blocks for single-crystal XRD was obtained by storing a saturated *n*-pentane solution at -20 °C for one day.

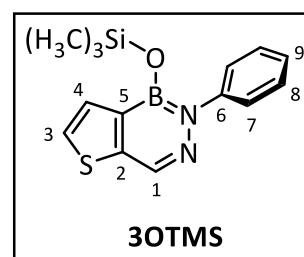

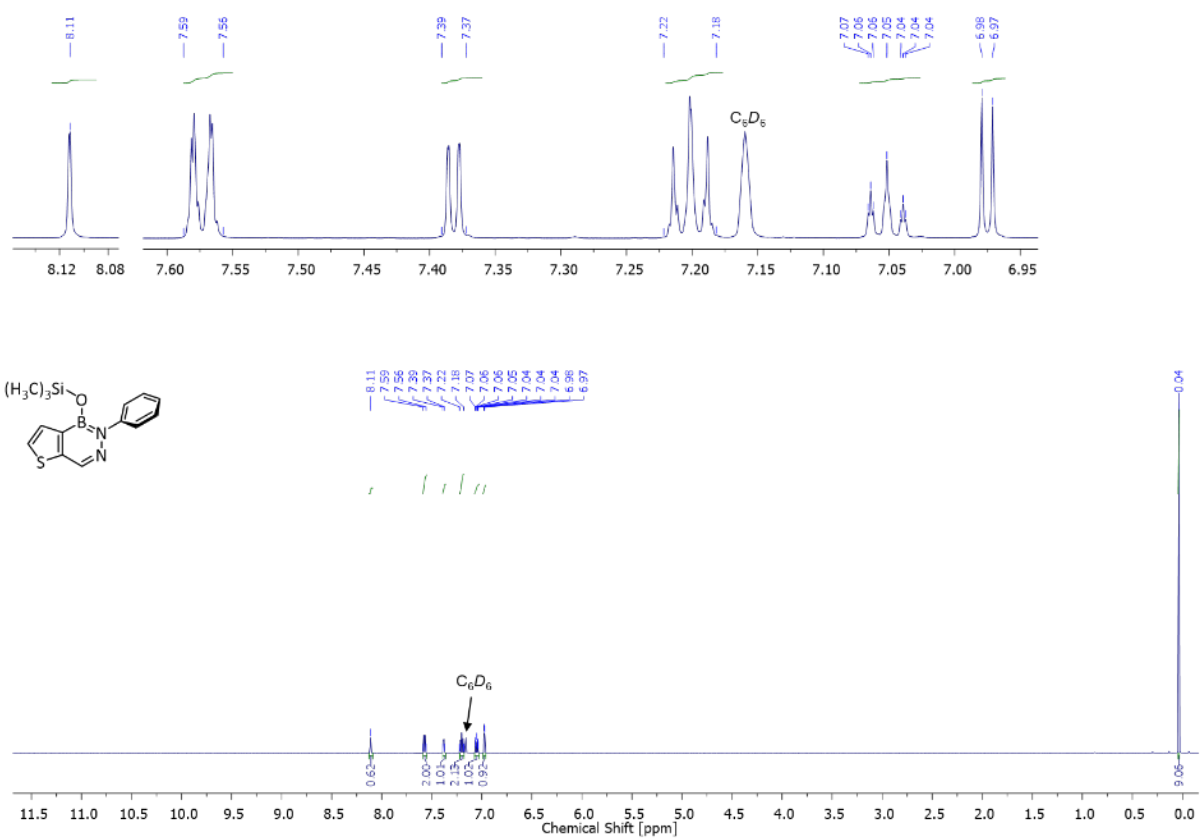

**Fig. S16** <sup>1</sup>H NMR spectrum of compound **30H** in C<sub>6</sub>D<sub>6</sub>.

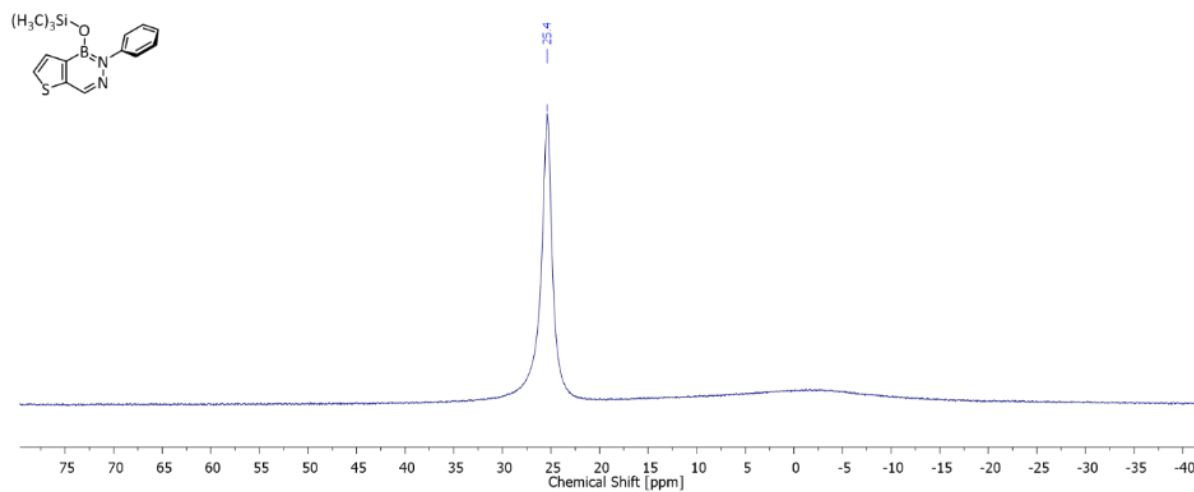

**Fig. S17** Background-reduced <sup>11</sup>B{<sup>1</sup>H} NMR spectrum of compound **30H** in C<sub>6</sub>D<sub>6</sub>.



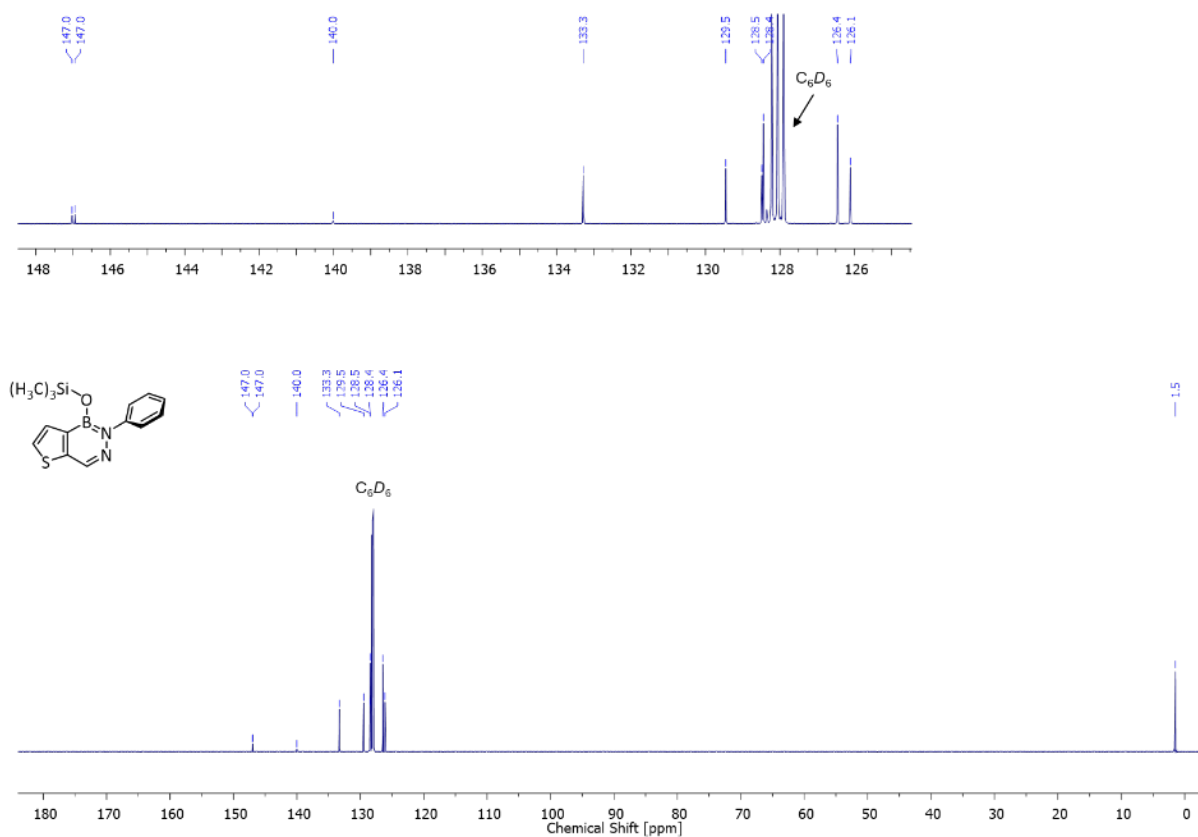

**Fig. S18**  $^{13}\text{C}\{^1\text{H}^{11}\text{B}\}$  NMR spectrum of compound **3OH** in  $\text{C}_6\text{D}_6$  ( $^{11}\text{B}$  decoupled at 25 ppm).

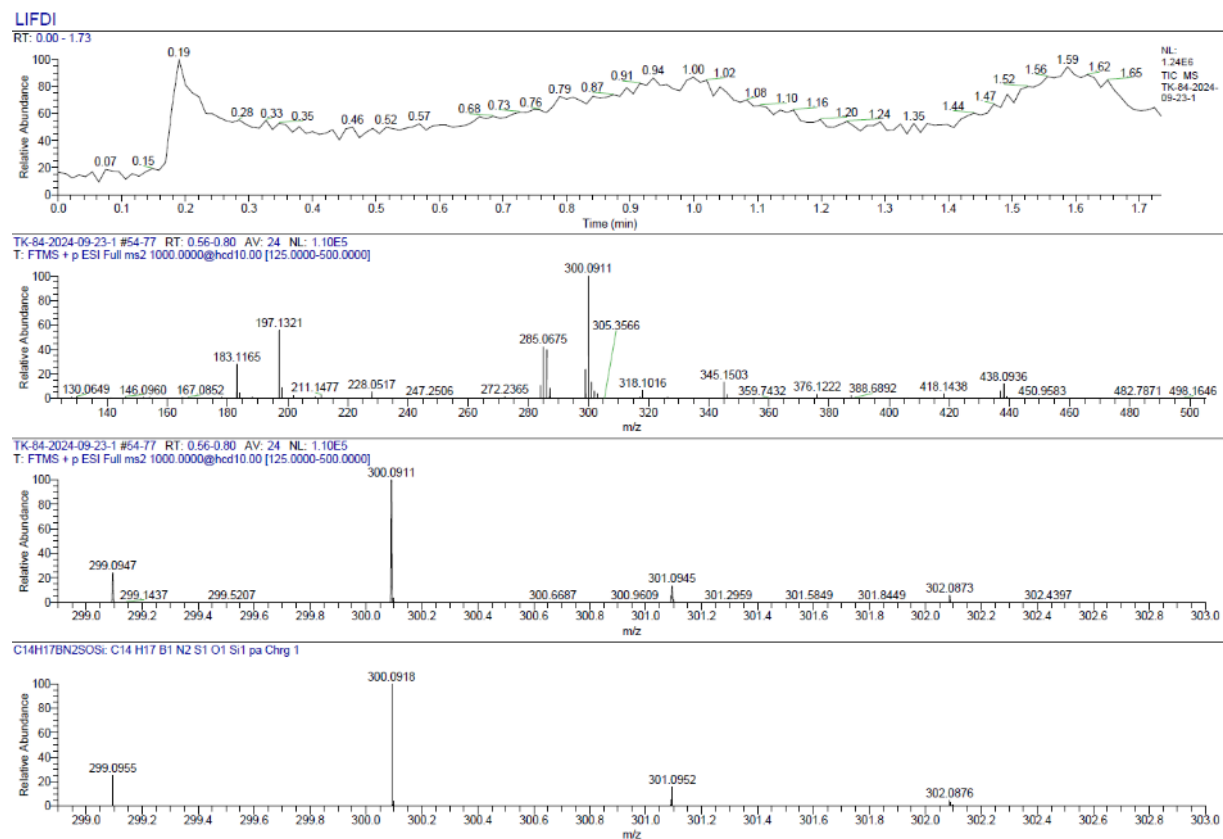

**Fig. S19** LIFDI mass spectrum of compound **3OH** (toluene).

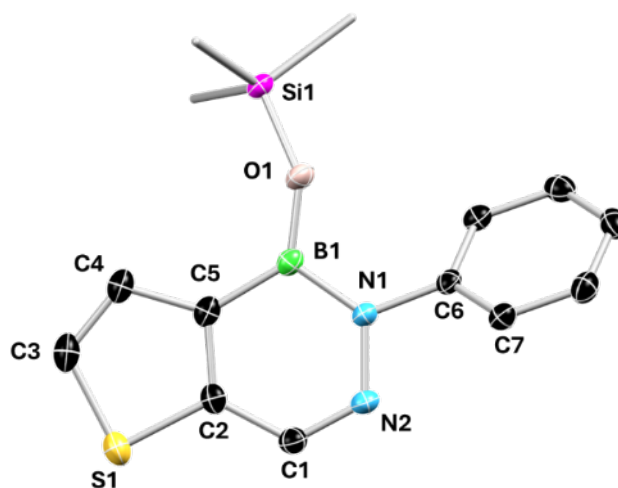

**Fig. S20** Molecular structure of compound **3OTMS**. Ellipsoids drawn at 50% probability (100 K). All H-atoms omitted. Selected bond lengths (Å) and angles (°): B1–N1 1.4544(18), N1–N2 1.3844(15), N2–C1 1.2976(18), C1–C2 1.4271(19), C2–S1 1.7273(14), S1–C3 1.7175(16), C3–C4 1.358(2), C4–C5 1.4315(18), C5–C2 1.385(2), C5–B1 1.532(2), B1–O1 1.3566(18), N1–C6 1.4378(17), B1–N1–N2–C1 2.0(2), N2–N1–C6–C7 135.87(12).

Crystal data:  $C_{14}H_{17}BN_2OSSi$ ,  $M_r = 300.25$ , clear colorless block,  $0.150 \times 0.110 \times 0.070$  mm<sup>3</sup>, triclinic space group  $P\bar{1}$ ,  $a = 8.77130(10)$  Å,  $b = 9.38310(10)$  Å,  $c = 10.18550(10)$  Å,  $\alpha = 84.2310(10)^\circ$ ,  $\beta = 69.7730(10)^\circ$ ,  $\gamma = 75.2450(10)^\circ$ ,  $V = 760.580(15)$  Å<sup>3</sup>,  $Z = 2$ ,  $\rho_{\text{calcd}} = 1.311$  g·cm<sup>-3</sup>,  $\mu = 2.604$  mm<sup>-1</sup>,  $F(000) = 316$ ,  $T = 100(2)$  K,  $R_1 = 0.0310$ ,  $wR_2 = 0.0872$ , 2974 independent reflections [ $2\theta \leq 149.512^\circ$ ] and 184 parameters.

CCDC number: 2453528

### 3,4-Bis(phenyl)-3,4-borazathieno[3,2-*d*]pyridine (**3Ph**)

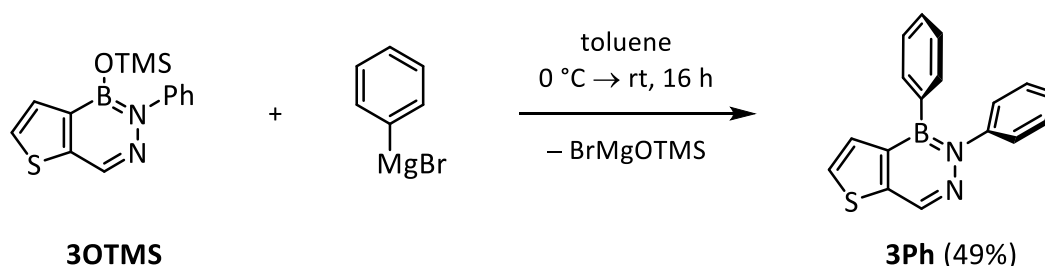

Compound **3OTMS** (500 mg, 1.67 mmol, 1.00 eq.) was suspended in toluene (175 mL) in a 250 mL Schlenk flask. Phenylmagnesium bromide (3.0 M solution in diethyl ether, 0.53 mL, 1.58 mmol, 0.95 eq.) was added in small portions at 0 °C (ice bath). Upon addition of the Grignard reagent a color change from colorless to yellow was observed. The cooling bath was removed, and the reaction was stirred for 16 h at ambient temperature. On air, celite was added to the solution and all volatile components were removed *in vacuo* without further aqueous workup or quenching. The obtained powder was purified by column chromatography (aluminum oxide (Act. I), *n*-hexane → *n*-hexane / ethyl acetate 10:1, TLC controls were performed with *n*-hexane / ethyl acetate 4:1,  $R_f(\mathbf{3OH}) = 0.16$ ,  $R_f(\mathbf{3Ph}) = 0.41$ ). Yield of **3Ph**: 93.0 mg (323  $\mu$ mol, 49%) of a colorless, crystalline solid. The compound is air- and moisture-stable.

**<sup>1</sup>H NMR** (600 MHz, 298 K,  $CD_2Cl_2$ )  $\delta$  = 8.68 (s, 1H, *H*-1), 7.71 (d, 1H,  $^3J_{HH} = 4.95$  Hz, *H*-3), 7.60 (d, 1H,  $^3J_{HH} = 4.95$  Hz, *H*-4), 7.37 (dd, 2H,  $^3J_{HH} = 7.69$  Hz,  $^4J_{HH} = 1.61$  Hz, *H*-11), 7.23-7.30 (m, 8H, *H*-7 + *H*-8 + *H*-9 + *H*-12 + *H*-13) ppm. **<sup>11</sup>B NMR** (193 MHz, 298 K,  $CD_2Cl_2$ ):  $\delta$  = 34.0 (br s) ppm. **<sup>13</sup>C{<sup>1</sup>H<sup>11</sup>B} NMR** (151 MHz, 298 K,  $CD_2Cl_2$ )  $\delta$  = 148.5 ( $C_q^N$ -6), 145.7 ( $C_q$ -5), 144.6 ( $C_q$ -2), 138.7 (C-10), 136.7 (C-1), 134.1 (C-11), 131.6 (C-4), 130.1

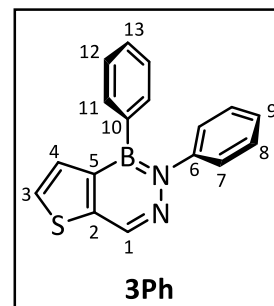

(C-3), 128.7 (C-13), 128.3 (C-12), 127.9 (C-7/C-8), 127.6 (C-7/C-8), 126.9 (C-9) ppm. **HRMS** (ASAP<sub>pos</sub>, toluene): expected:  $m/z$  288.1002, 289.0965, 290.0999 [ $C_{17}H_{13}BN_2S+H$ ]<sup>+</sup>; found:  $m/z$  288.0994, 289.0955, 290.0989 [ $C_{17}H_{13}BN_2S+H$ ]<sup>+</sup>. Crystalline material of **3Ph** as colorless blocks for single-crystal XRD was obtained by storing a saturated *n*-pentane solution at –20 °C for one day.

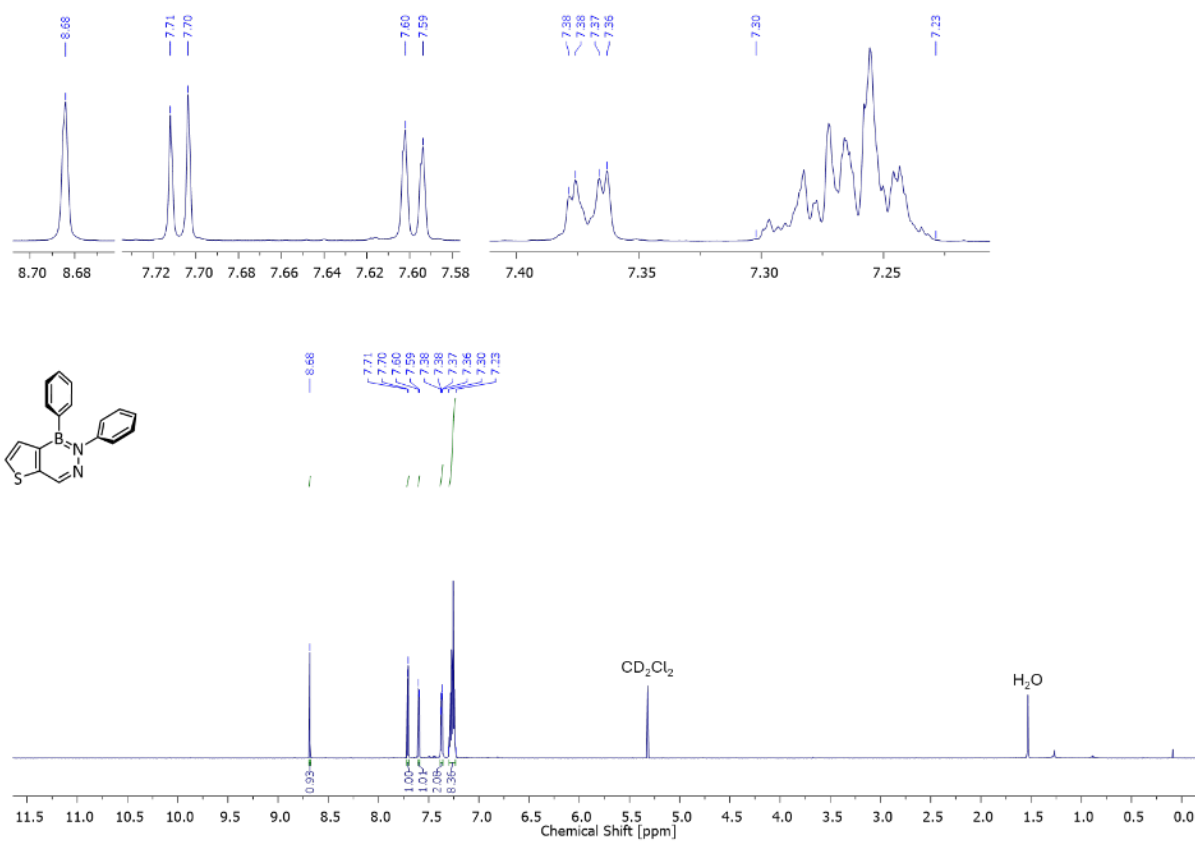

**Fig. S21** <sup>1</sup>H NMR spectrum of compound **3Ph** in CD<sub>2</sub>Cl<sub>2</sub>.

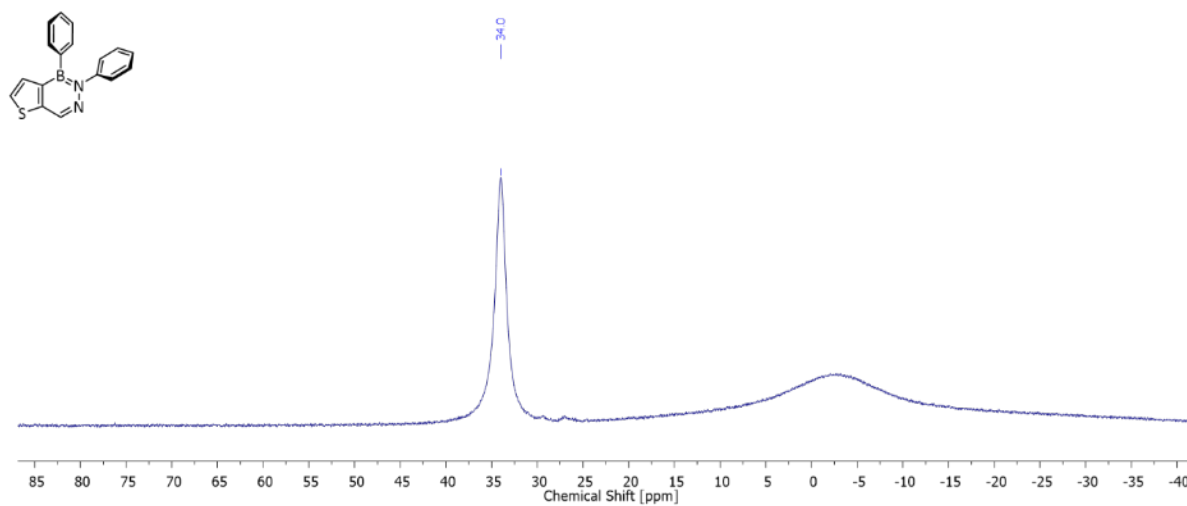

**Fig. S22** Background-reduced <sup>11</sup>B NMR spectrum of compound **3Ph** in CD<sub>2</sub>Cl<sub>2</sub>.

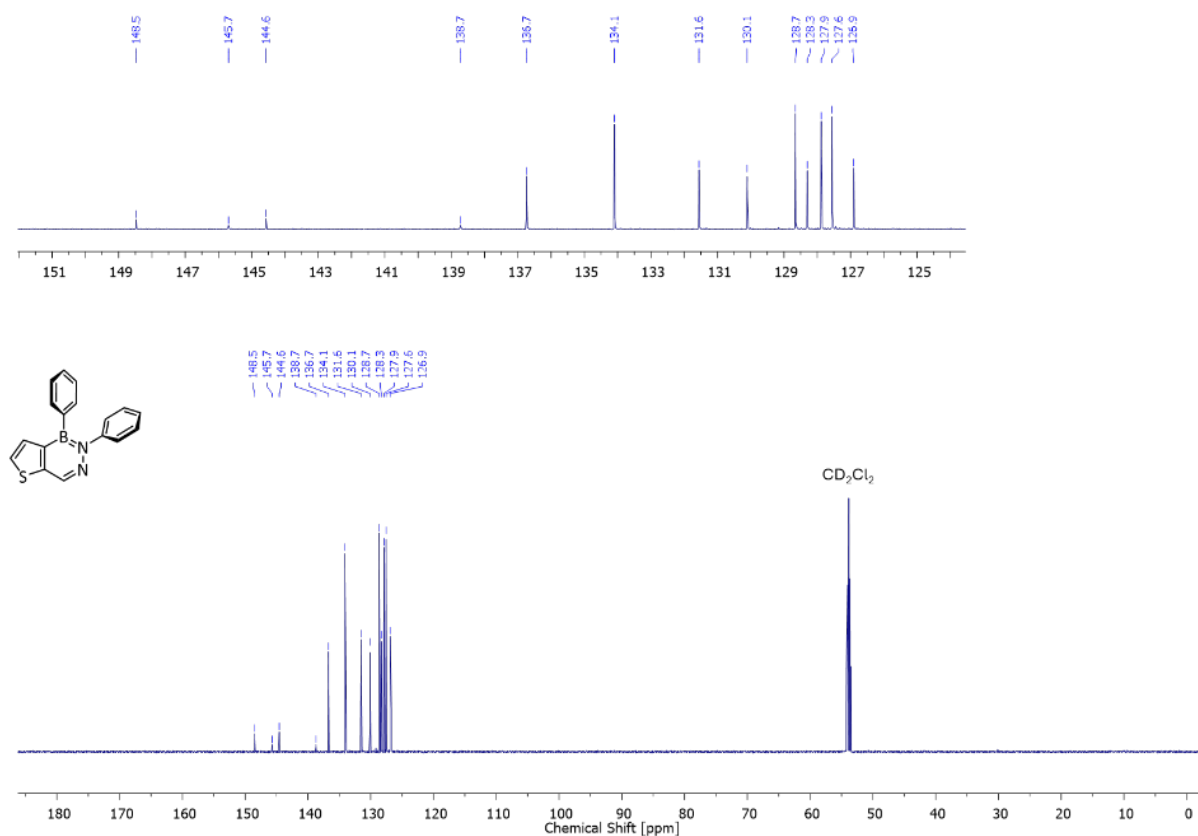

**Fig. S23**  $^{13}\text{C}\{^1\text{H}^{11}\text{B}\}$  NMR spectrum of compound **3Ph** in  $\text{CD}_2\text{Cl}_2$  ( $^{11}\text{B}$  decoupled at 34 ppm).

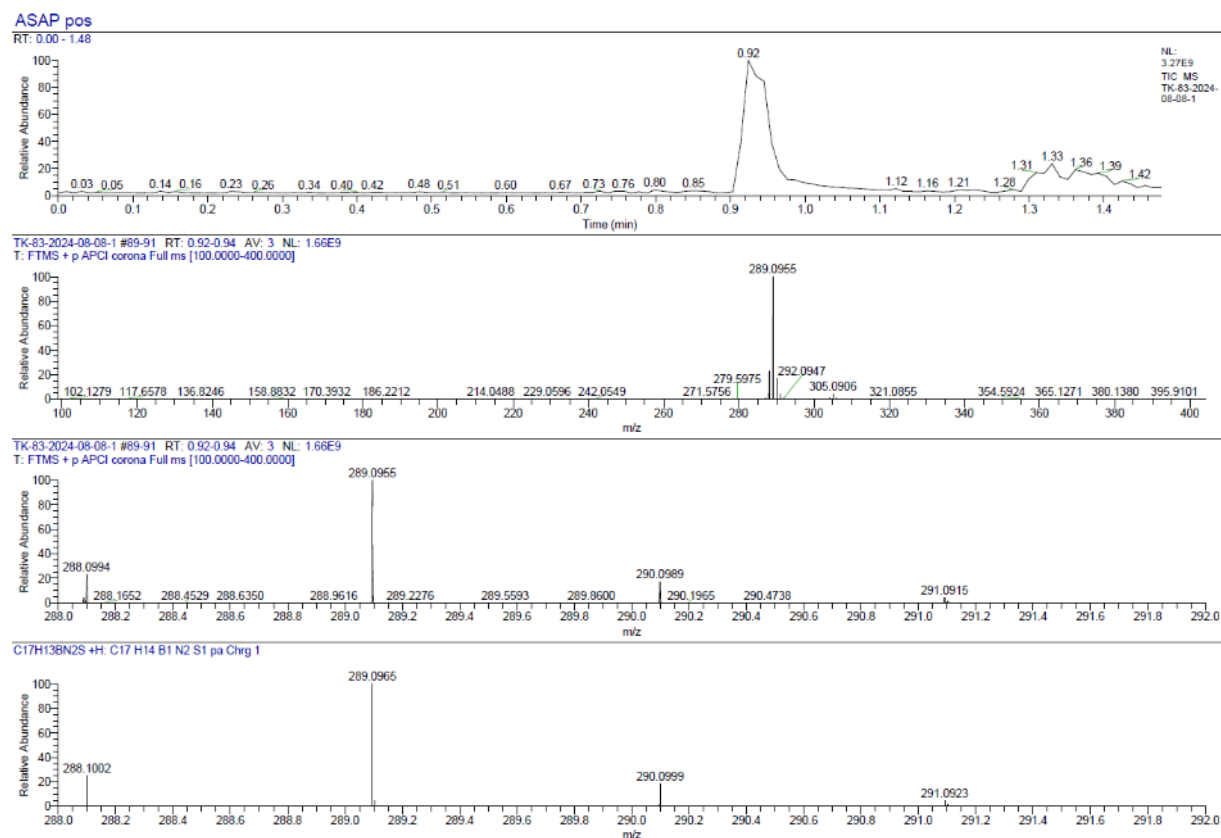

**Fig. S24** ASAP<sub>pos</sub> mass spectrum of compound **3Ph** (toluene).

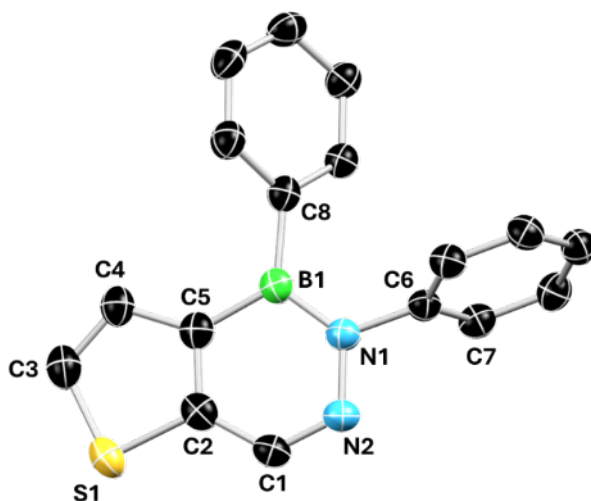

**Fig. S25** Molecular structure of compound **3Ph**. Ellipsoids drawn at 50% probability (100 K). All H-atoms omitted. Selected bond lengths (Å) and angles (°): B1–N1 1.423(3), N1–N2 1.386(2), N2–C1 1.307(3), C1–C2 1.423(3), C2–S1 1.729(2), S1–C3 1.728(3), C3–C4 1.360(3), C4–C5 1.431(3), C5–C2 1.382(3), C5–B1 1.531(3), B1–C8 1.577(3), N1–C6 1.441(2), B1–N1–N2–C1 0.8(3), N2–N1–C6–C7 76.4(2).

Crystal data:  $C_{17}H_{13}BN_2S$ ,  $M_r = 288.16$ , colorless block,  $0.280 \times 0.090 \times 0.060 \text{ mm}^3$ , monoclinic space group  $P2_1/n$ ,  $a = 11.1933(2) \text{ Å}$ ,  $b = 9.5312(2) \text{ Å}$ ,  $c = 13.9740(3) \text{ Å}$ ,  $\beta = 101.575(2)^\circ$ ,  $V = 1460.51(5) \text{ Å}^3$ ,  $Z = 4$ ,  $\rho_{\text{calcd}} = 1.311 \text{ g}\cdot\text{cm}^{-3}$ ,  $\mu = 1.888 \text{ mm}^{-1}$ ,  $F(000) = 600$ ,  $T = 100(2) \text{ K}$ ,  $R_1 = 0.0519$ ,  $wR_2 = 0.1324$ , 2851 independent reflections [ $2\theta \leq 149.43^\circ$ ] and 190 parameters.

CCDC number: 2453529

### 1-Methyl-3-phenyl-4-hydroxy-4,3-borazaroisoquinoline (**4OH**)

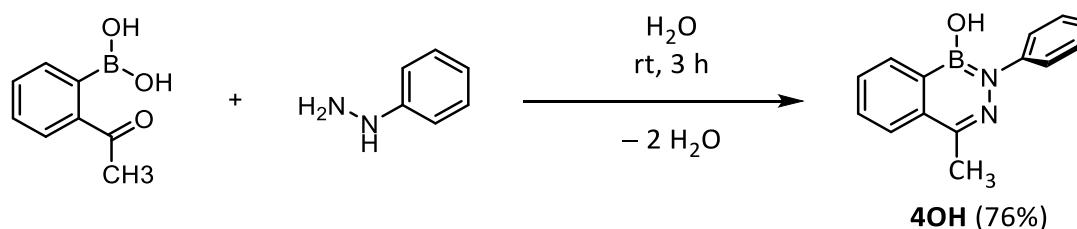

Open to the atmosphere, 2-acetylphenylboronic acid (4.93 g, 30.1 mmol, 1.00 eq.) was suspended in distilled water (600 mL) in a 1 L round bottom flask with a dumbbell stirring bar and stirred until total dissolution (approx. 10 min). Phenylhydrazine (2.96 mL, 30.1 mmol, 1.00 eq.,  $\rho = 1.10$  g/mL) was added under rapid stirring at ambient temperature, which resulted in the immediate formation of a colorless precipitate. After stirring for 3 h, the solid was filtered off and washed with distilled water ( $2 \times 50$  mL). The filter cake was dried in suction vacuum, and the obtained off-white powder was additionally dried in a vacuum desiccator (orange gel) until a consistent weight was achieved. **Yield of 4OH:** 5.41 g, 22.9 mmol, 76%, colorless powder. The compound is air- and moisture-stable.

**$^1\text{H}$  NMR** (600 MHz, 298 K,  $\text{DMSO-}d_6$ ):  $\delta$  = 8.77 (s, 1H, B-OH), 8.42 (d,  $^3J_{\text{HH}} = 7.58$  Hz, 1H, H-6), 7.89 (d,  $^3J_{\text{HH}} = 8.03$  Hz, 1H, H-3), 7.78 (dd,  $^3J_{\text{HH}} = 7.6$  Hz, 7.6 Hz; 1H, H-4), 7.67 (dd,  $^3J_{\text{HH}} = 7.57$  Hz, 7.57 Hz; 1H, H-5), 7.58 (d,  $^3J_{\text{HH}} = 7.85$  Hz, 2H, H-9), 7.39 (d,  $^3J_{\text{HH}} = 7.25$  Hz, 2H, H-10), 7.20 (d,  $^3J_{\text{HH}} = 7.27$  Hz, 1H, H-11), 2.55 (s, 3H,  $-\text{CH}_3$ ) ppm.  **$^{11}\text{B}$  NMR** (193 MHz, 298 K,

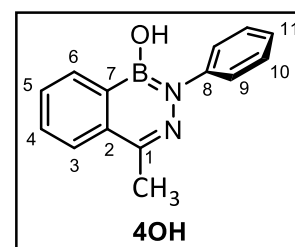

$\text{DMSO-}d_6$ )  $\delta$  = 28.2 (br s) ppm.  **$^{13}\text{C}\{^1\text{H}^{11}\text{B}\}$  NMR** (151 MHz, 298 K,  $\text{DMSO-}d_6$ ):  $\delta$  = 146.4 ( $\text{C}_q^{\text{N-8}}$ ), 142.7 ( $\text{C}_q^{\text{-1}}$ ), 134.8 ( $\text{C}_q^{\text{-2}}$ ), 131.9 (C-6), 131.4 (C-4), 130.2 ( $\text{C}_q^{\text{B-7}}$ ), 128.7 (C-5), 128.1 (C-10), 125.3 (C-3), 124.6 (C-11), 124.4 (C-9), 20.0 ( $-\text{CH}_3$ ) ppm. **HRMS** (ASAP<sub>pos</sub>, acetone): expected:  $m/z$  236.1230, 237.1194, 238.1227 [ $\text{C}_{14}\text{H}_{13}\text{BN}_2\text{O}+\text{H}$ ]; found:  $m/z$  236.1220, 237.1182, 238.1214 [ $\text{C}_{14}\text{H}_{13}\text{BN}_2\text{O}+\text{H}$ ]. Crystalline material of **4OH** as colorless plates for single-crystal XRD was obtained by slow evaporation of a saturated acetone/ $\text{H}_2\text{O}$  mixture at ambient temperature open to the atmosphere.

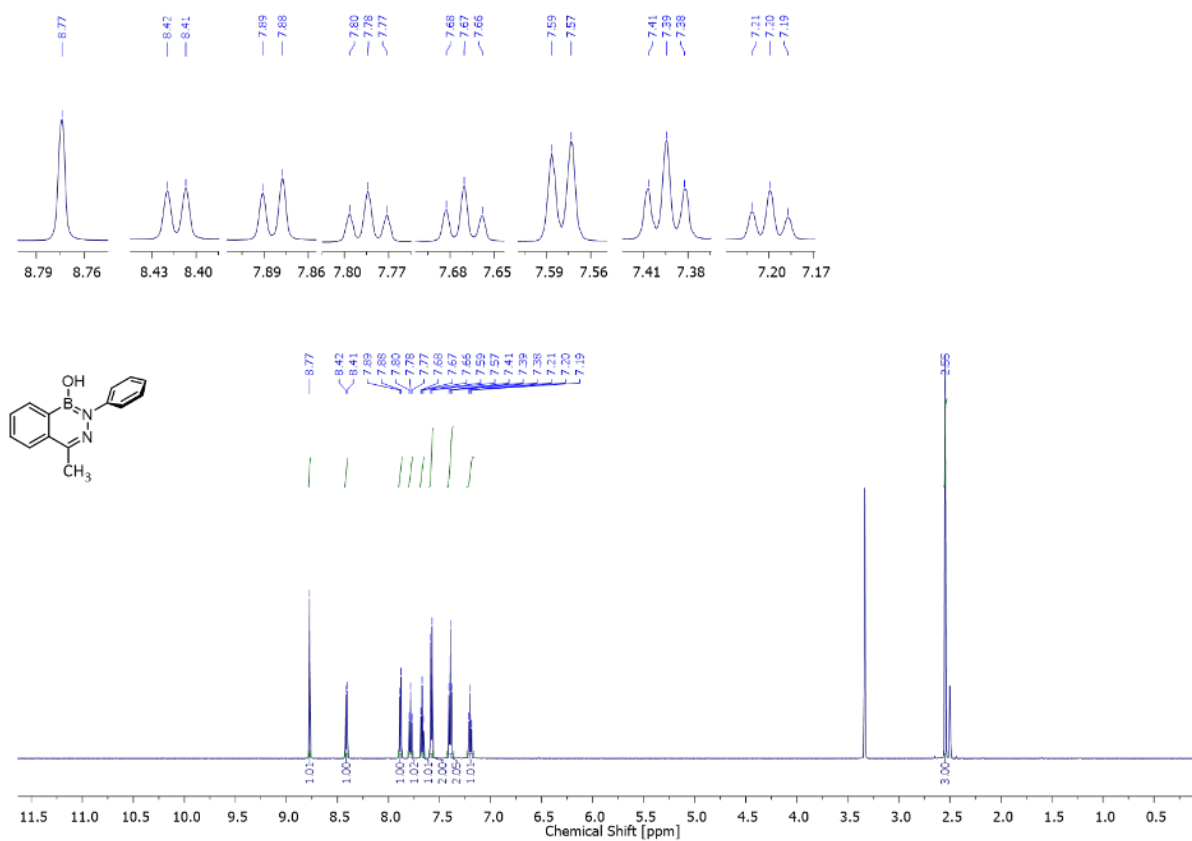

**Fig. S26** <sup>1</sup>H NMR spectrum of compound **4OH** in DMSO-*d*<sub>6</sub>.

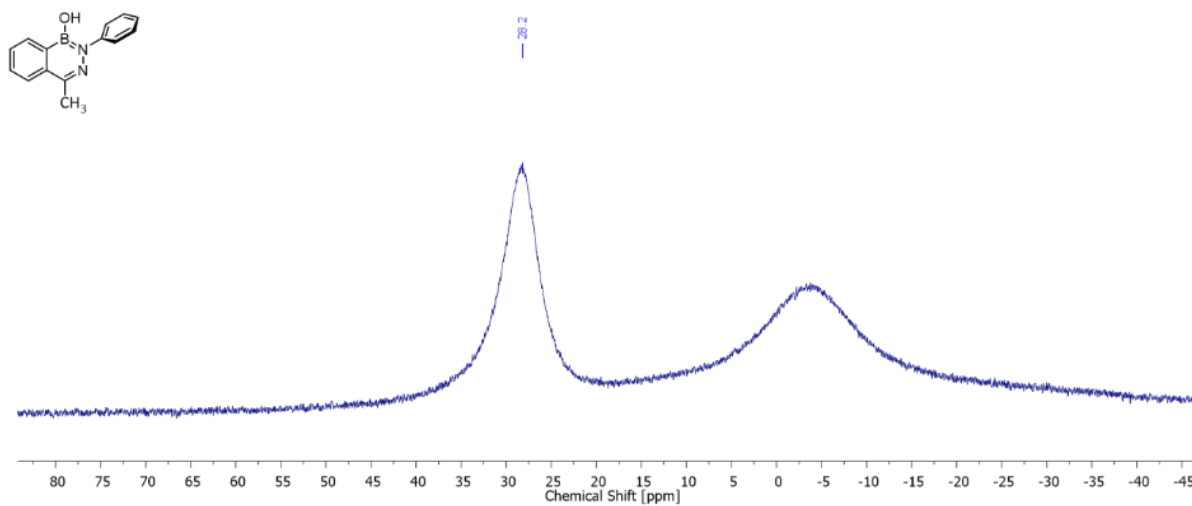

**Fig. S27** Background-reduced <sup>11</sup>B NMR spectrum of compound **4OH** in DMSO-*d*<sub>6</sub>.



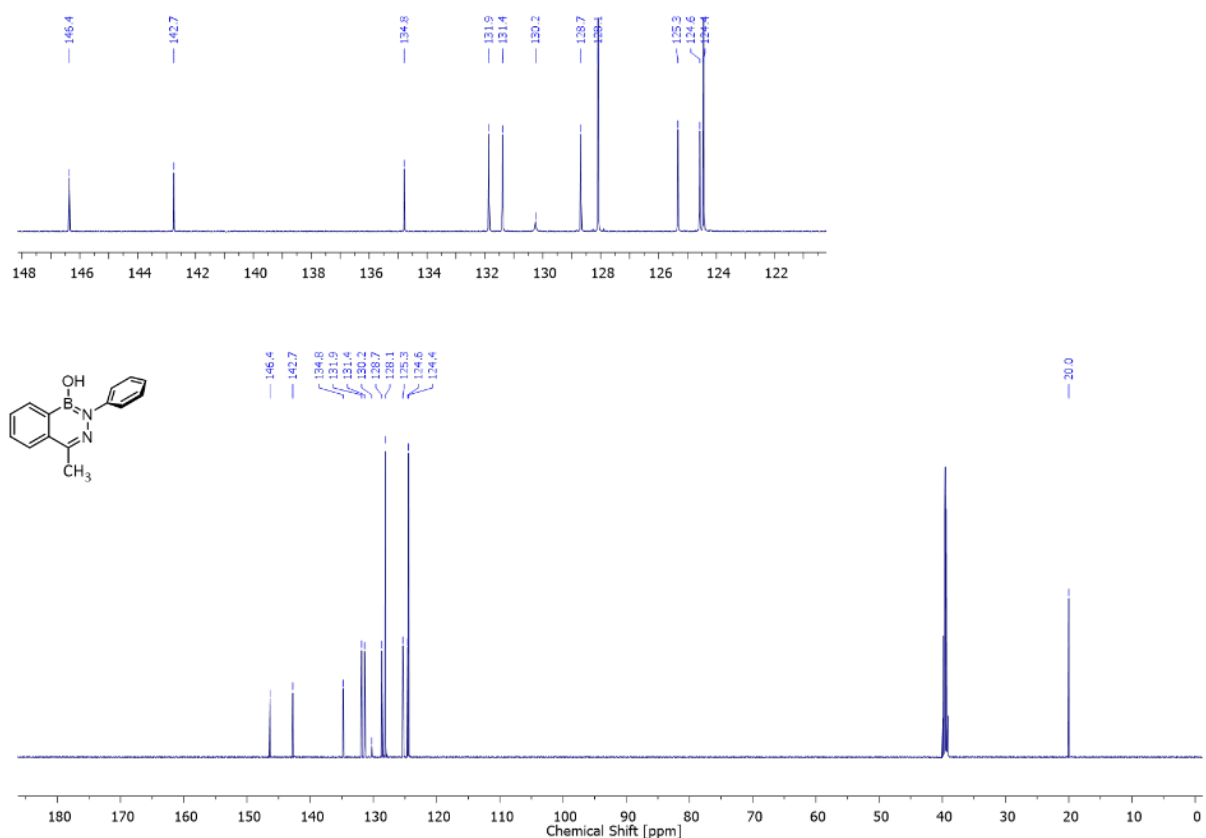

**Fig. S28** <sup>13</sup>C{<sup>1</sup>H<sup>11</sup>B} NMR spectrum of compound **4OH** in DMSO-*d*<sub>6</sub> (decoupled at 28 ppm).

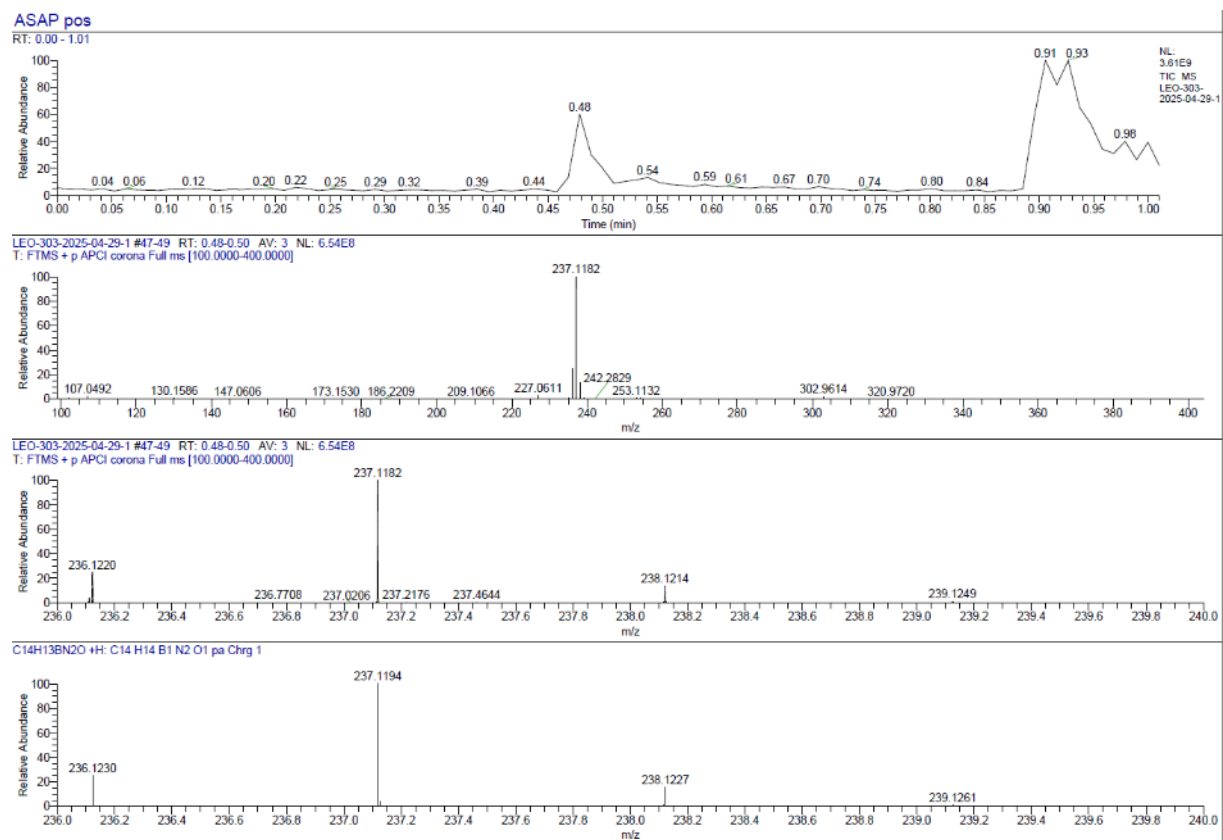

**Fig. S29** ASAP<sub>pos</sub> mass spectrum of compound **4OH** (acetone).

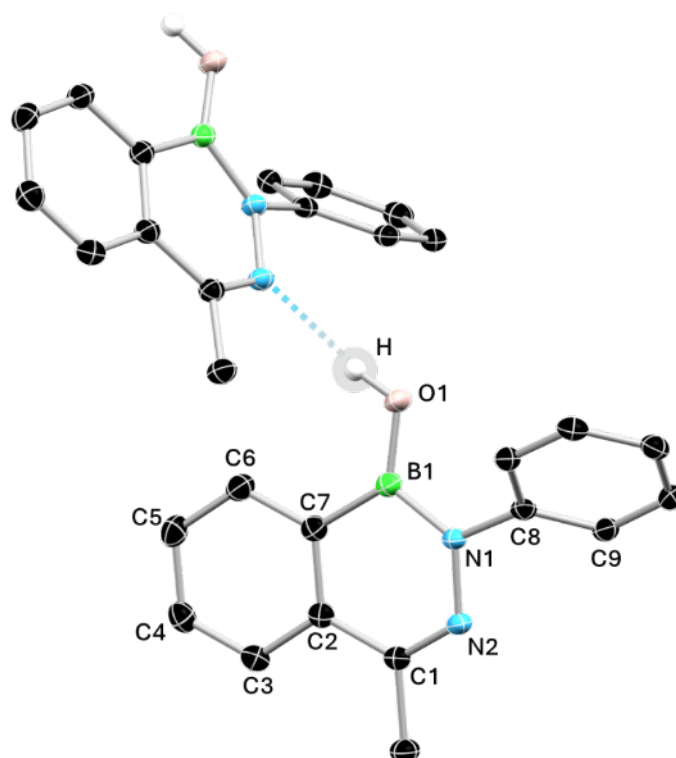

**Fig. S30**

Molecular structure of compound **4OH**. Ellipsoids drawn at 50% probability (100 K). All H-atoms except for the borinic acid omitted. Selected bond lengths (Å) and angles (°) of **4OH**: B1–N1 1.4393(15), N1–N2 1.3920(12), N2–C1 1.3028(14), C1–C2 1.4620(15), C2–C3 1.4056(16), C3–C4 1.3818(16), C4–C5 1.3965(17), C5–C6 1.3844(16), C6–C7 1.4068(15), C2–C7 1.4081(15), C7–B1 1.5452(16), B1–O1 1.3648(15), N1–C8 1.4354(14), B1–N1–N2–C1 7.76(15), N2–N1–C8–C9 45.32(13).

Crystal data:  $C_{14}H_{13}BN_2O$ ,  $M_r = 236.07$ , clear colorless plate,  $0.490 \times 0.320 \times 0.050 \text{ mm}^3$ , triclinic space group  $P\bar{1}$ ,  $a = 10.7572(2) \text{ Å}$ ,  $b = 10.8505(2) \text{ Å}$ ,  $c = 11.0433(3) \text{ Å}$ ,  $\alpha = 76.604(2)^\circ$ ,  $\beta = 70.642(2)^\circ$ ,  $\gamma = 74.681(2)^\circ$ ,  $V = 1158.10(5) \text{ Å}^3$ ,  $Z = 4$ ,  $\rho_{\text{calcd}} = 1.354 \text{ g}\cdot\text{cm}^{-3}$ ,  $\mu = 0.676 \text{ mm}^{-1}$ ,  $F(000) = 496$ ,  $T = 100(2) \text{ K}$ ,  $R_1 = 0.0393$ ,  $wR_2 = 0.1001$ , 4562 independent reflections [ $2\theta \leq 148.032^\circ$ ] and 333 parameters.

CCDC number: 2453530

### 1-Methyl-3-phenyl-4-(trimethylsilyloxy)-4,3-borazaroisoquinoline (**4OTMS**)

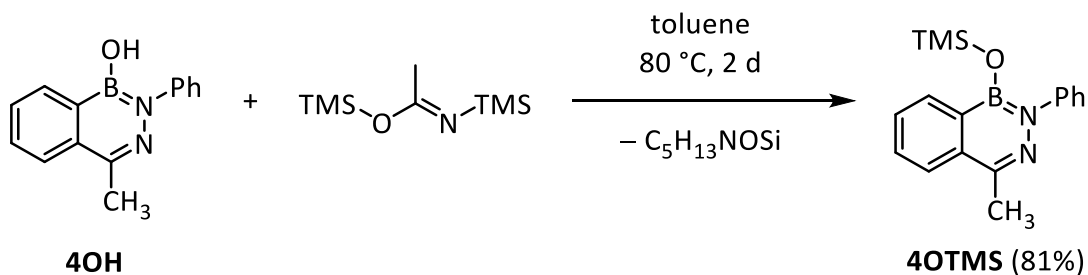

DAB **4OH** (3.00 g, 12.7 mmol, 1.00 eq.) was suspended in toluene (150 mL) in a 250 mL Schlenk tube. Under rapid stirring, *N,O*-bis(trimethylsilyl)acetamide (20.0 mL, 82.6 mmol, xs.,  $\rho = 0.83 \text{ g/mL}$ ) was added at ambient temperature. After stirring the suspension for 10 min, a clear, light yellow solution was obtained. The reaction was then heated to 80 °C for 2 d. All volatile components were removed *in vacuo* with an external cooling trap. For the removal of the byproduct *N*-(trimethylsilyl)acetamide *via* sublimation, the obtained yellow oil was heated to 80 °C at  $1.2 \cdot 10^{-2}$  mbar. The remaining yellow oil was extracted with *n*-pentane ( $3 \times 4 \text{ mL}$ ) via filter cannulation and all volatile components were removed *in vacuo*. Compound **4OTMS** was obtained as yellow oil. After storing the pure oil at –30 °C in a glovebox for several weeks, the oil started crystalizing. **Yield of 4OTMS:** 3.16 g, 10.2 mmol, 81%, yellow oil.

**$^1\text{H}$  NMR** (500 MHz, 298 K,  $\text{C}_6\text{D}_6$ ):  $\delta = 8.22\text{--}8.26$  (m, 1H, *H*-3), 7.60–7.62 (m, 2H, *H*-9), 7.49–7.53 (m, 1H, *H*-6), 7.38–7.42 (m, 2H, *H*-4 + *H*-5), 7.20–7.24 (m, 2H, *H*-10), 7.03–7.07 (m, 1H, *H*-11), 2.50 (s, 3H, – $\text{CH}_3$ ), 0.04 (s, 9H, – $\text{Si}(\text{CH}_3)_3$ ) ppm.  **$^{11}\text{B}$  NMR** (160 MHz, 298 K,  $\text{C}_6\text{D}_6$ )  $\delta = 26.8$  (br s) ppm.  **$^{13}\text{C}\{^1\text{H}\}$  NMR** (126 MHz, 298 K,  $\text{C}_6\text{D}_6$ ):  $\delta = 147.4$  ( $\text{C}_q^{\text{N-8}}$ ), 144.1 ( $\text{C}_q^{\text{-1}}$ ), 136.5 ( $\text{C}_q^{\text{-2}}$ ), 133.0 ( $\text{C}_q^{\text{B-7}}$ ), 132.3 ( $\text{C-3}$ ), 131.3 ( $\text{C-5}$ ), 128.7 ( $\text{C-6}$ ), 128.6 ( $\text{C-10}$ ), 126.5 ( $\text{C-9}$ ), 125.8 ( $\text{C-11}$ ), 125.5 ( $\text{C-6}$ ), 20.3 (– $\text{CH}_3$ ), 1.6 (– $\text{Si}(\text{CH}_3)_3$ ) ppm. **HRMS** (LIFDI, toluene): expected:  $m/z$  307.1547, 08.1511, 309.1544 [ $\text{C}_{17}\text{H}_{21}\text{BN}_2\text{OSi}$ ]; found:  $m/z$  307.1539, 308.1502, 309.1536 [ $\text{C}_{17}\text{H}_{21}\text{BN}_2\text{OSi}$ ]. Crystalline material of **4OTMS** as colorless plates for single-crystal XRD was obtained by storing the obtained oil at –30 °C for several weeks.

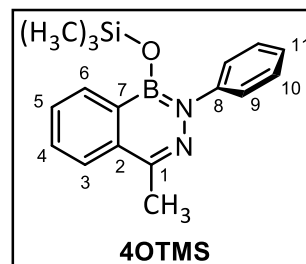

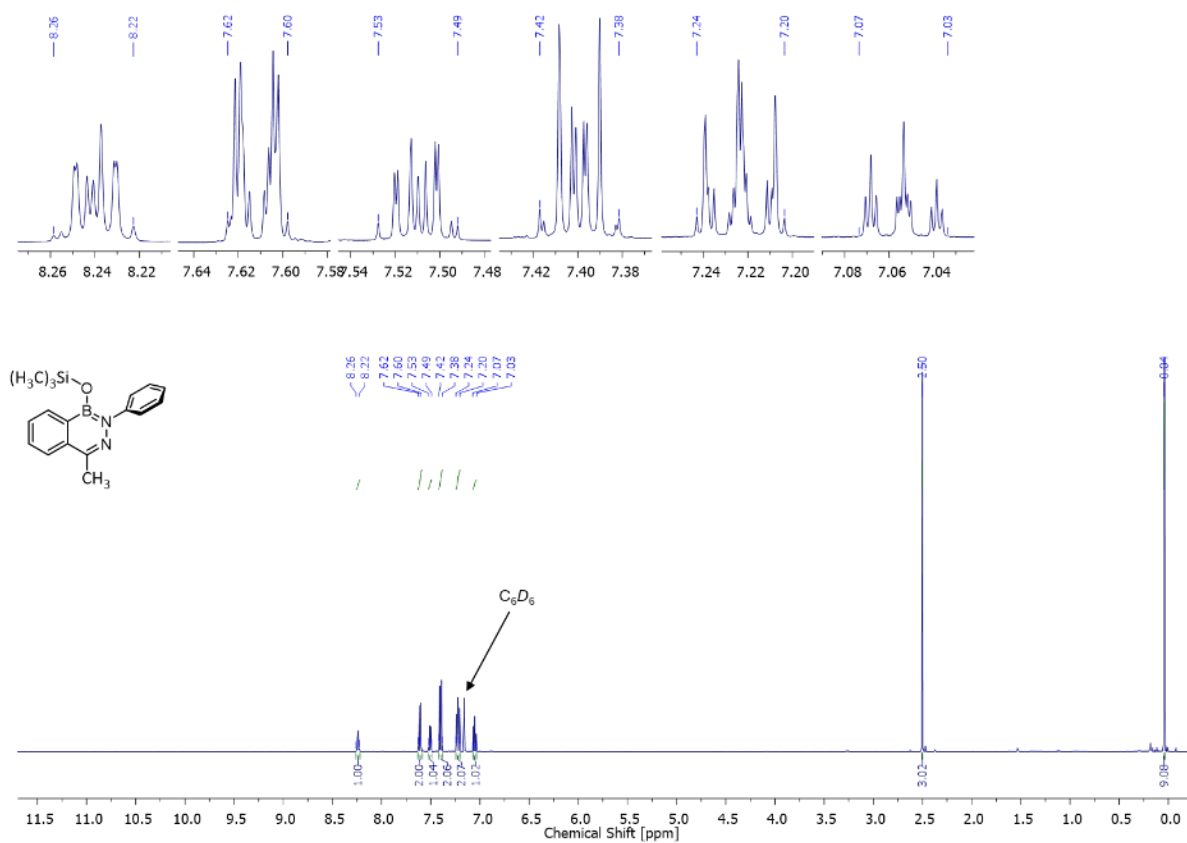

**Fig. S31**  $^1\text{H}$  NMR spectrum of compound **4OTMS** in  $\text{C}_6\text{D}_6$ .

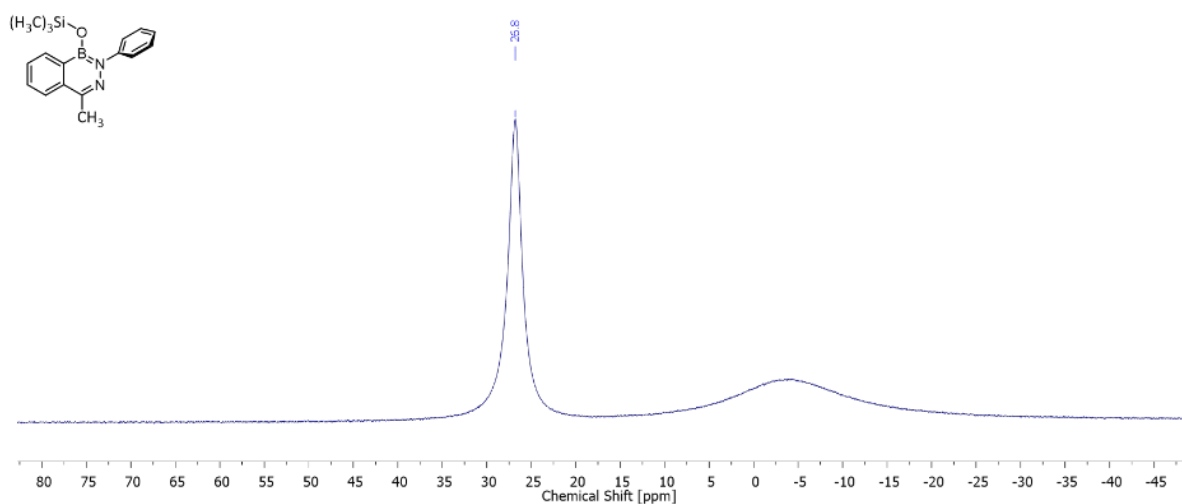

**Fig. S32** Background-reduced  $^{11}\text{B}$  NMR spectrum of compound **4OTMS** in  $\text{C}_6\text{D}_6$ .

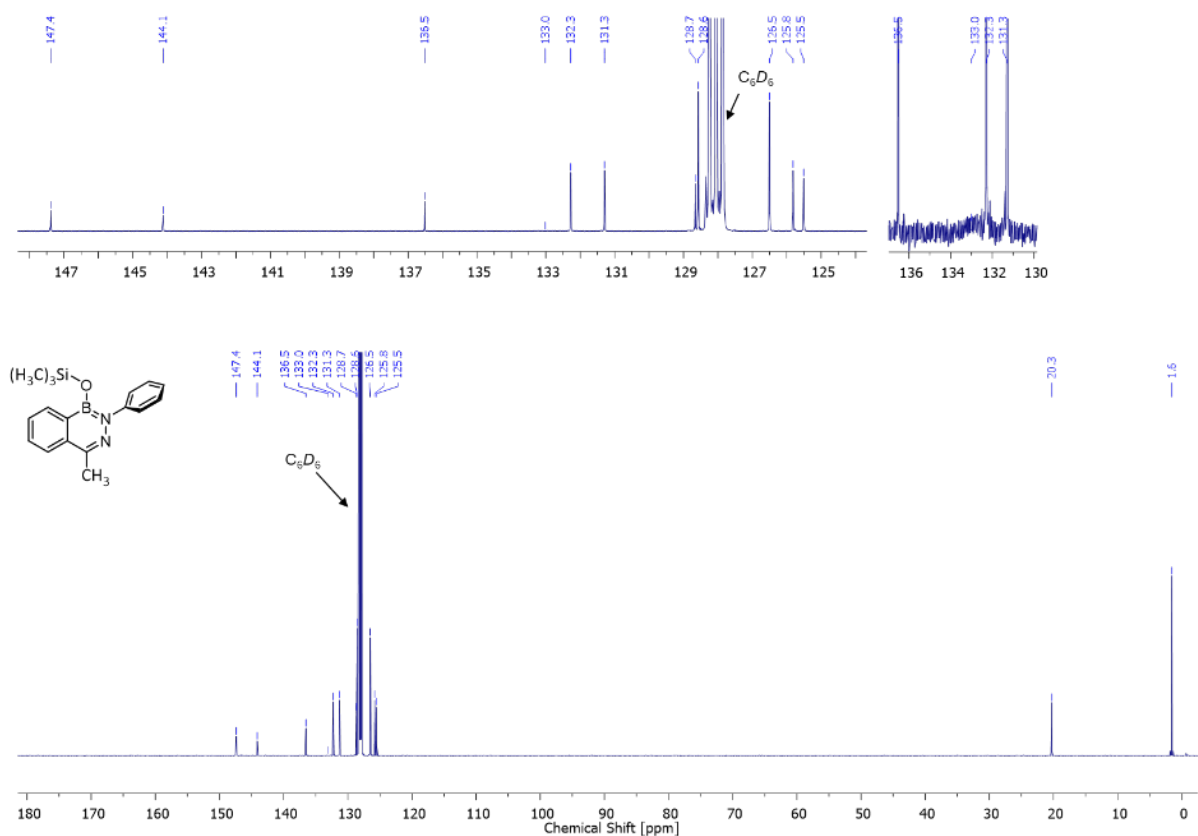

**Fig. S33** <sup>13</sup>C{<sup>1</sup>H} NMR spectrum of compound 4OTMS in C<sub>6</sub>D<sub>6</sub>.

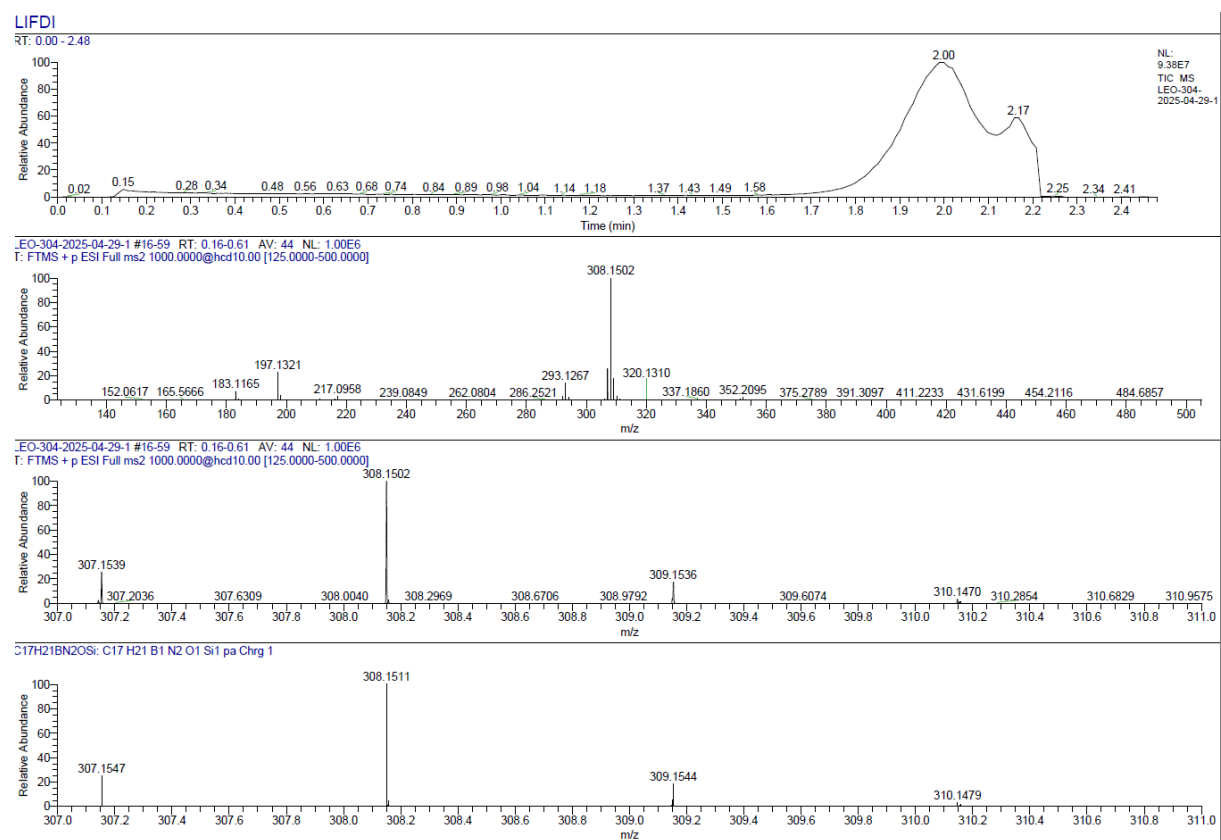

**Fig. S34** LIFDI mass spectrum of compound 4OTMS (toluene).

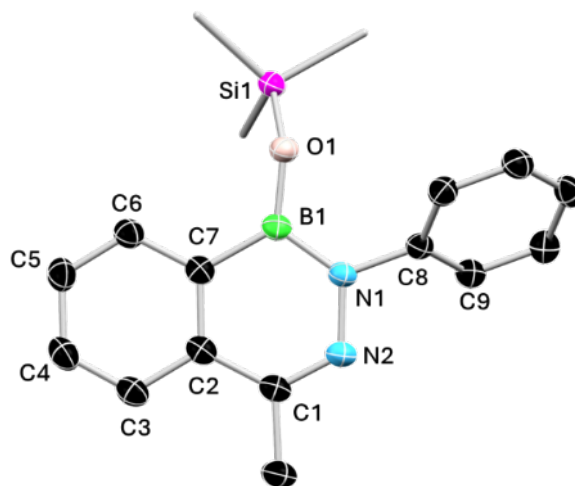

**Fig. S35** Molecular structure of compound **4OTMS**. Ellipsoids drawn at 50% probability (100 K). All H-atoms except for the boronic acid omitted and methyl groups of the TMS-group shown as wireframe. Selected bond lengths (Å) and angles (°) of **4OTMS**: B1–N1 1.4279(19), N1–N2 1.3950(15), N2–C1 1.3025(18), C1–C2 1.455(2), C2–C3 1.411(2), C3–C4 1.375(2), C4–C5 1.399(2), C5–C6 1.381(2), C6–C7 1.406(2), C2–C7 1.4084(19), C7–B1 1.540(2), B1–O1 1.3662(18), N1–C8 1.4381(17), B1–N1–N2–C1 3.47(19), N2–N1–C8–C9 54.67(15).

Crystal data:  $C_{17}H_{21}BN_2OSi$ ,  $M_r = 308.26$ , translucent colorless plate,  $0.410 \times 0.370 \times 0.060$  mm<sup>3</sup>, monoclinic space group  $P2_1/c$ ,  $a = 10.4615(2)$  Å,  $b = 14.0366(3)$  Å,  $c = 12.1057(3)$  Å,  $\beta = 105.153(2)^\circ$ ,  $V = 1715.84(7)$  Å<sup>3</sup>,  $Z = 4$ ,  $\rho_{\text{calcd}} = 1.193$  g·cm<sup>-3</sup>,  $\mu = 1.213$  mm<sup>-1</sup>,  $F(000) = 656$ ,  $T = 100(2)$  K,  $R_1 = 0.0408$ ,  $wR_2 = 0.1014$ , 3443 independent reflections [ $2\theta \leq 149.402^\circ$ ] and 203 parameters.

CCDC number: 2453531

**Tetra(*n*-butyl)ammonium 3-(phenyl)-4-bis(fluoro)-4,3-borazaroisoquinolinatate (**5F[TBA]**)**

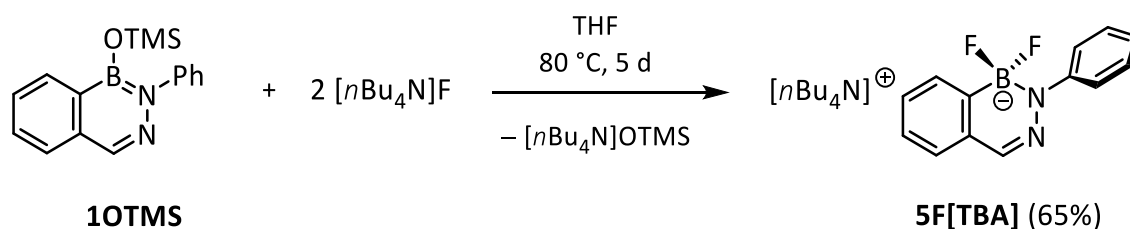

Compound **1OTMS** (118 mg, 400  $\mu\text{mol}$ , 1.00 eq.) was dissolved in THF (4 mL) in a Schlenk tube equipped with a stirring bar. Tetra-*n*-butylammonium fluoride (1.0 M solution in THF, 1.60 mL, 1.60 mmol, 4.00 eq.) was added dropwise at ambient temperature. Upon addition, the colorless reaction mixture turned yellow. The reaction mixture was then stirred for 5 d at 80  $^\circ\text{C}$ . The solvent was removed under reduced pressure and the obtained yellow, sticky solid was recrystallized from MeCN (1.0 mL) at  $-30\text{ }^\circ\text{C}$ , washed with cold ( $-30\text{ }^\circ\text{C}$ ) MeCN ( $3 \times 1.0\text{ mL}$ ) and dried *in vacuo*. **Yield of 5F[TBA]:** 127 mg, 260  $\mu\text{mol}$ , 65%, pale-yellow powder.

**$^1\text{H}$  NMR** (500 MHz, 298 K,  $\text{THF-}d_8$ ):  $\delta$  = 7.75 (d,  $^3J_{\text{HH}}$  = 8.07 Hz, 2H, *H*-9), 7.58-7.61 (m, 1H, *H*-3), 7.14 (s, 1H, *H*-1), 7.03-7.09 (m, 2H, *H*-4 + *H*-5), 6.96-7.01 (m, 3H, *H*-10 + *H*-6), 6.54 (tt,  $^3J_{\text{HH}}$  = 7.12 Hz;  $^4J_{\text{HH}}$  = 1.15 Hz, 1H, *H*-11), 2.67-2.75 (m, 8H, *H*-12), 1.16-1.25 (m, 8H, *H*-13), 1.06 (sext,  $^3J_{\text{HH}}$  = 7.66 Hz, 8H, *H*-14), 0.77 (t,  $^3J_{\text{HH}}$  = 7.30 Hz, 12H,  $^n\text{Bu-CH}_3$ ) ppm.

**$^{11}\text{B}\{^{19}\text{F}\}$  NMR** (160 MHz, 298 K,  $\text{THF-}d_8$ )  $\delta$  = 3.4 (br s) ppm.  **$^{13}\text{C}\{^1\text{H}\}$  NMR** (126 MHz, 298 K,  $\text{THF-}d_8$ )  $\delta$  = 151.8 (t,  $^3J_{\text{CF}}$  = 3.07 Hz,  $\text{C}_q^{\text{N-8}}$ ), 145.0 (br,  $\text{C}_q^{\text{B-7}}$ ), 134.1 (t,  $^3J_{\text{CF}}$  = 3.41 Hz,  $\text{C}_q^{\text{-2}}$ ), 132.3 (C-1), 131.6 (C-3), 128.0 (C-10),

126.5 (C-4), 126.1 (C-5), 123.4 (C-9), 117.8 (t,  $^4J_{\text{CF}}$  = 3.27 Hz, C-6), 117.7 (C-11), 58.4 (C-12), 24.1 (C-13), 20.0 (C-14), 13.7 ( $^n\text{Bu-CH}_3$ ) ppm.  **$^{19}\text{F}\{^{11}\text{B}\}$  NMR** (471 MHz, 298 K,  $\text{THF-}d_8$ )  $\delta$  =  $-131.5$  (s) ppm.

**HRMS** ( $\text{ESI}_{\text{neg}}$ , THF): expected:  $m/z$  242.0947, 243.0911, 244.0944 [ $\text{C}_{13}\text{H}_{10}\text{BF}_2\text{N}_2$ ] $^-$ ; found:  $m/z$  242.0947, 243.0908, 244.0939 [ $\text{C}_{13}\text{H}_{10}\text{BF}_2\text{N}_2$ ] $^-$ . Crystalline material of **5F[TBA]** as colorless blocks for single-crystal XRD was obtained by slow evaporation of a saturated THF solution at  $-30\text{ }^\circ\text{C}$ .

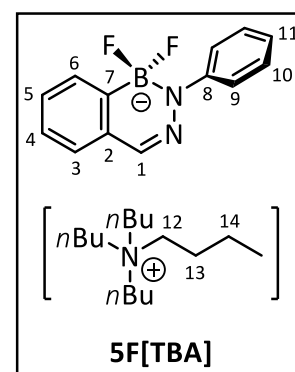

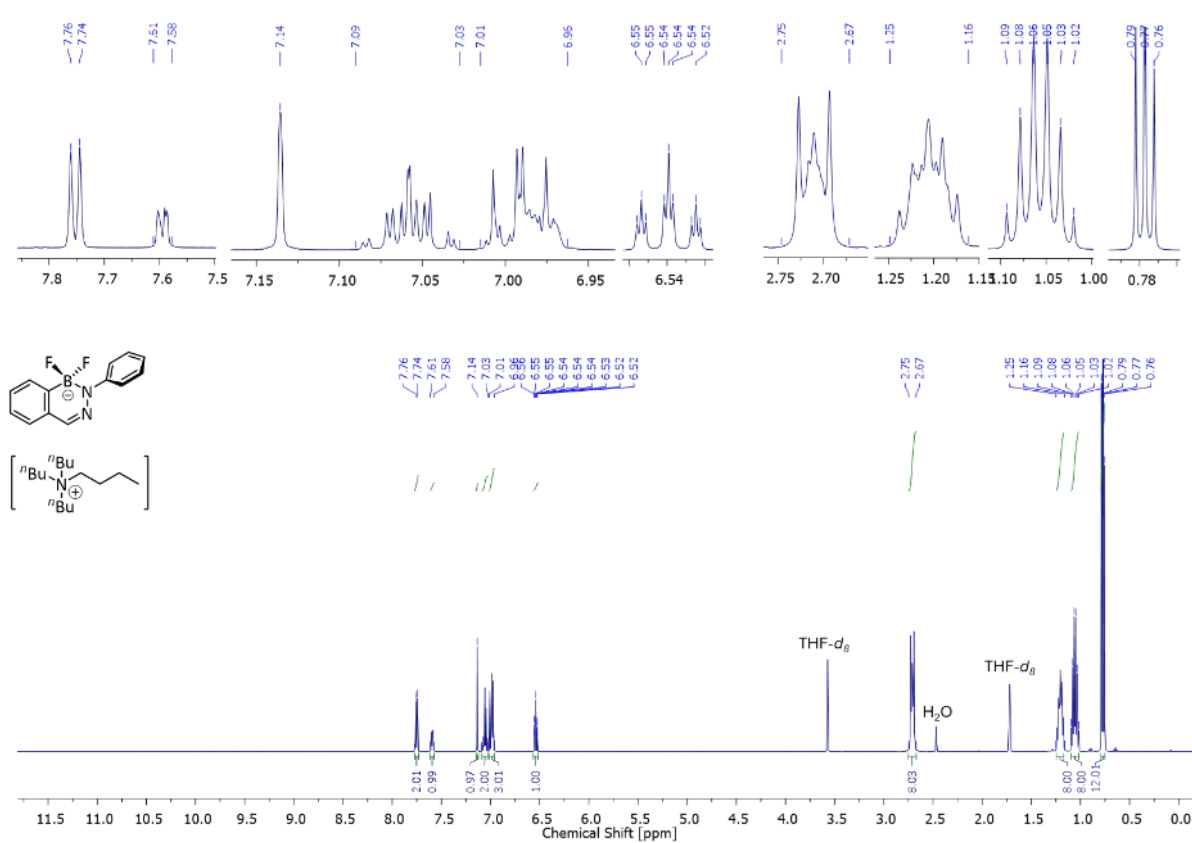

**Fig. S36**  $^1\text{H}$  NMR spectrum of compound **5F[TBA]** in  $\text{THF-}d_8$ .

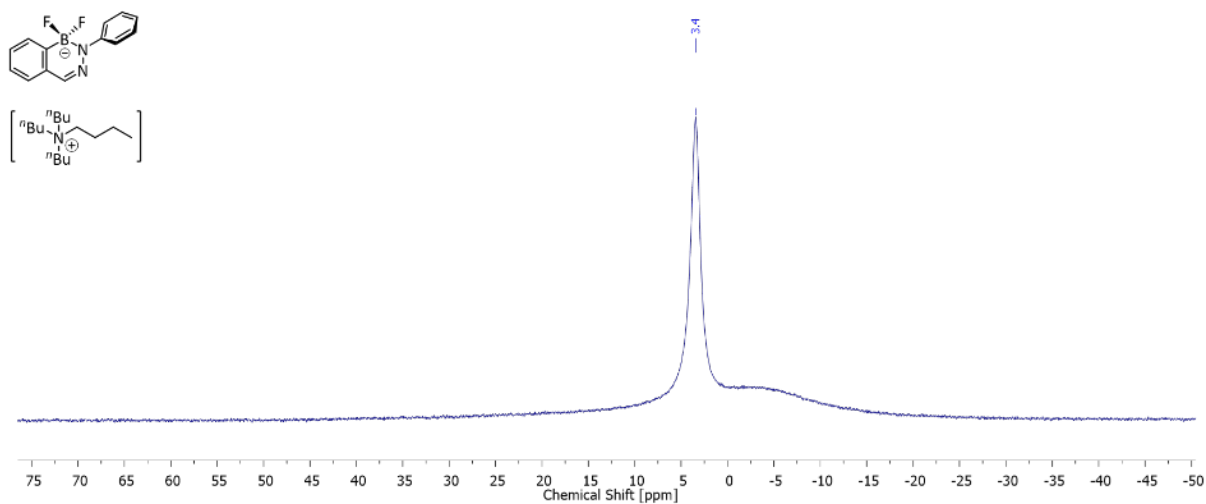

**Fig. S37**  $^{11}\text{B}\{^{19}\text{F}\}$  NMR spectrum of compound **5F[TBA]** in  $\text{THF-}d_8$  ( $^{19}\text{F}$  decoupled at  $-131$  ppm).



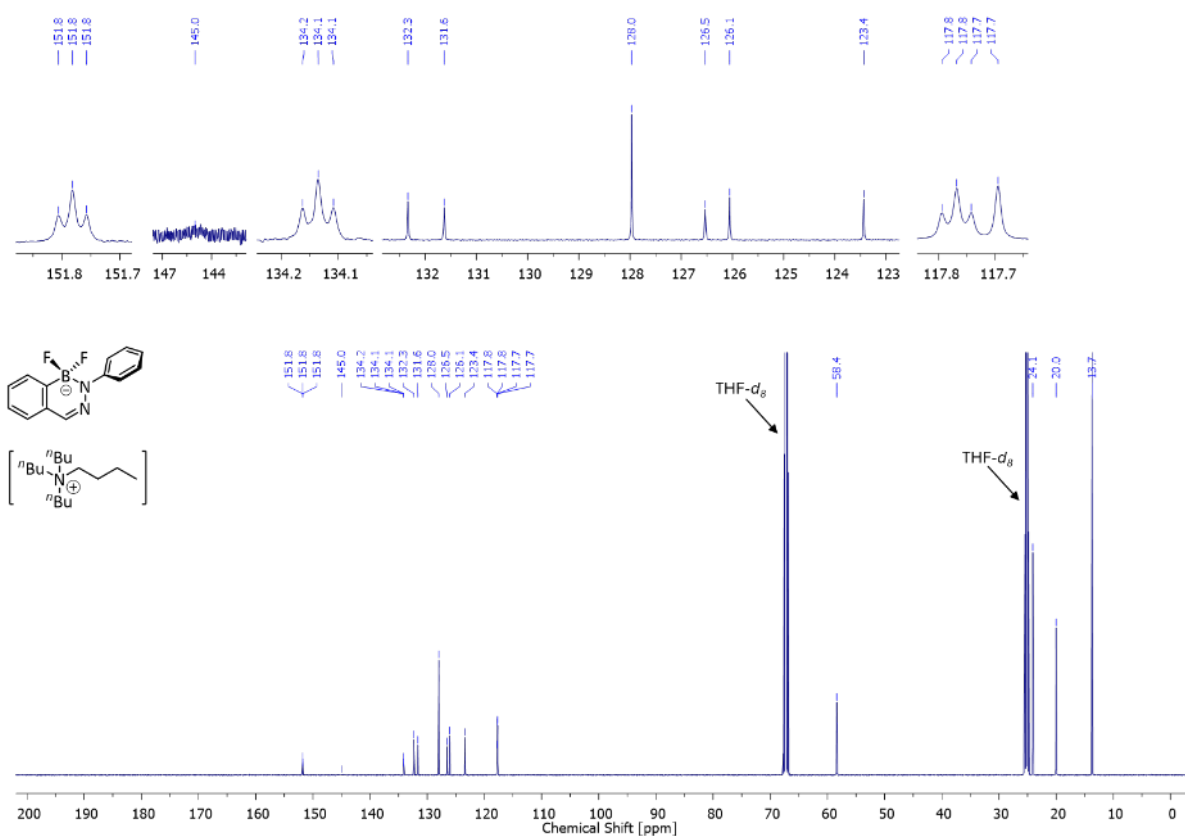

**Fig. S38**  $^{13}\text{C}\{^1\text{H}\}$  NMR spectrum of compound **5F[TBA]** in THF- $d_8$ .

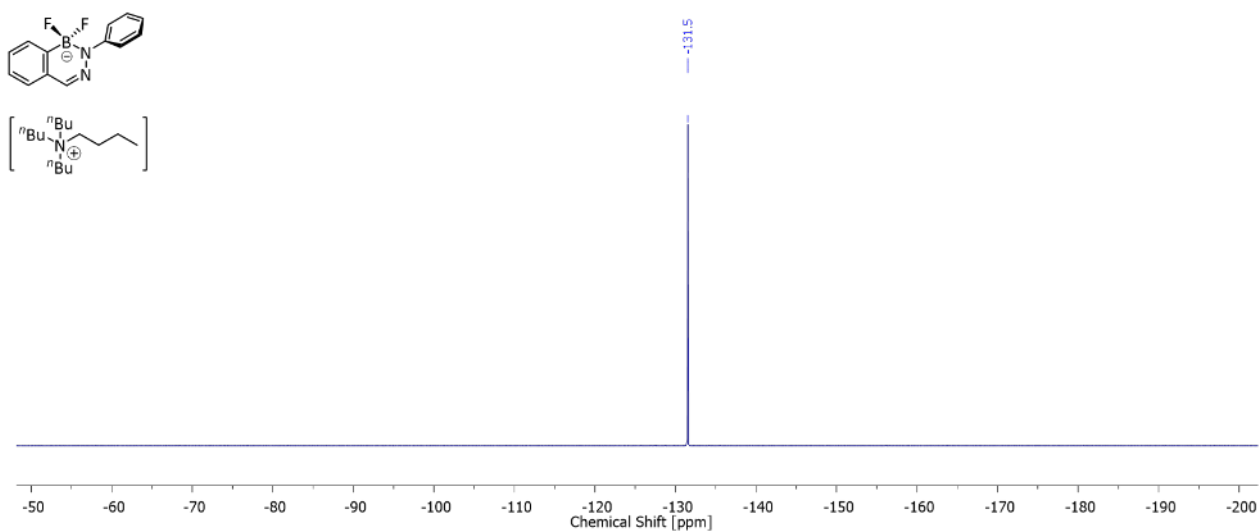

**Fig. S39**  $^{19}\text{F}\{^{11}\text{B}\}$  NMR spectrum of compound **5F[TBA]** in THF- $d_8$  ( $^{11}\text{B}$  decoupled at 3 ppm).

# ESI neg, THF, measurement: L. Swoboda

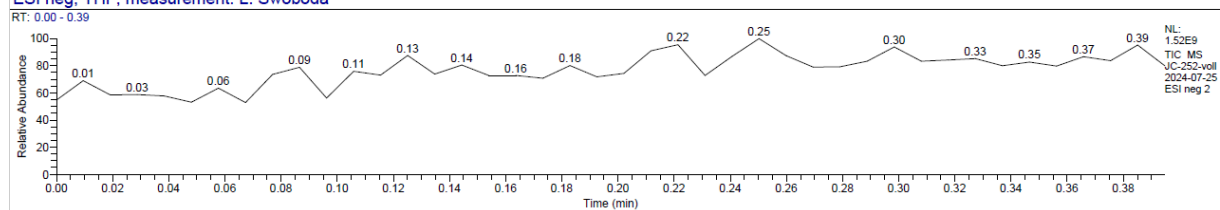

JC-252-vol 2024-07-25 ESI neg 2 #4-42 RT: 0.03-0.39 AV: 39 NL: 6.64E8  
T: FTMS - p ESI Full ms [120.0000-400.0000]

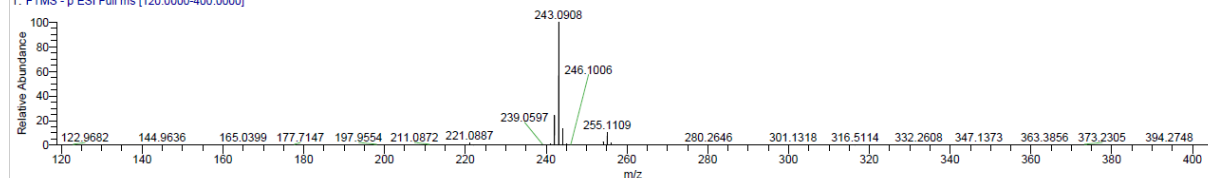

JC-252-vol 2024-07-25 ESI neg 2 #4-42 RT: 0.03-0.39 AV: 39 NL: 6.64E8  
T: FTMS - p ESI Full ms [120.0000-400.0000]

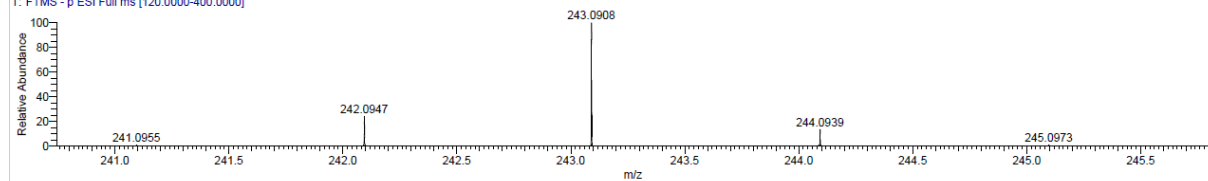

C13H10BF2N2: C13 H10 B1 F2 N2 pa Chrg -1

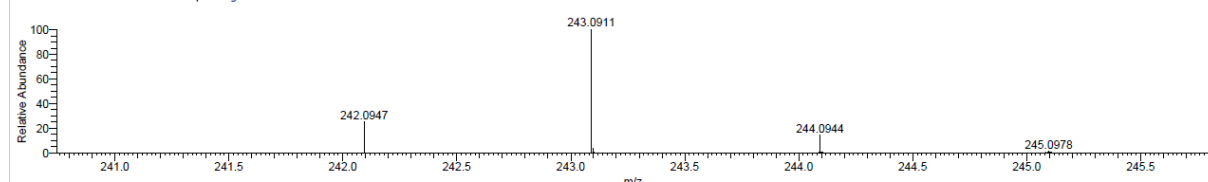

**Fig. S40** ESI<sub>neg</sub> mass spectrum of compound **5F[TBA]** (THF).

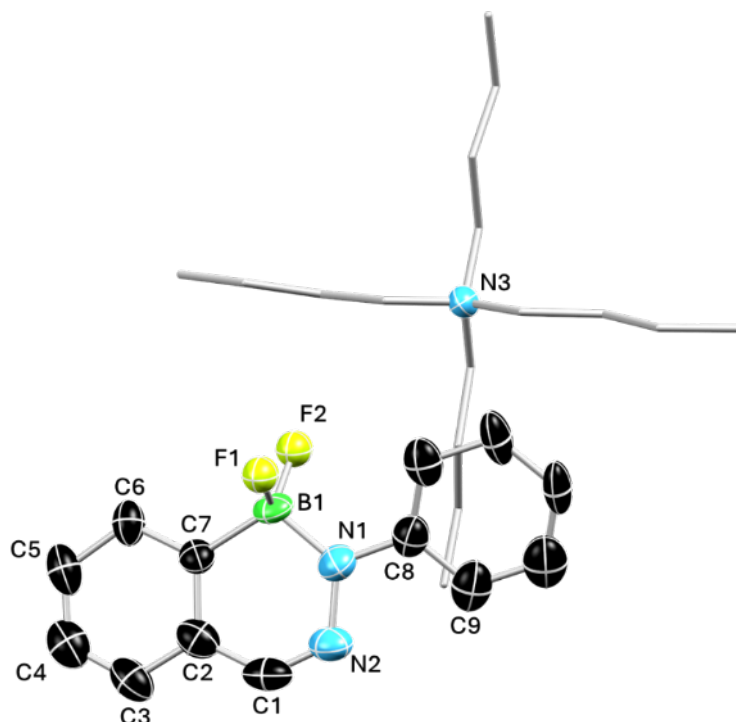

**Fig. S41** Molecular structure of compound **5F[TBA]**. Ellipsoids drawn at 50% probability (100 K). All H-atoms omitted. *n*-Butyl substituents of the cation rendered as wireframe for clarity. Due to the presence of a whole molecule disorder of the borate anion (see appendix), no discussion of bond length is possible.

Crystal data:  $C_{29}H_{45}BF_2N_3$ ,  $M_r = 490.49$ , colorless block,  $0.250 \times 0.100 \times 0.080 \text{ mm}^3$ , monoclinic space group  $Pn$ ,  $a = 9.7015(2) \text{ \AA}$ ,  $b = 9.6925(2) \text{ \AA}$ ,  $c = 14.9167(3) \text{ \AA}$ ,  $\beta = 92.447(2)^\circ$ ,  $V = 1401.36(5) \text{ \AA}^3$ ,  $Z = 2$ ,  $\rho_{\text{calcd}} = 1.162 \text{ g}\cdot\text{cm}^{-3}$ ,  $\mu = 0.605 \text{ mm}^{-1}$ ,  $F(000) = 532$ ,  $T = 100(2) \text{ K}$ ,  $R_1 = 0.0668$ ,  $wR_2 = 0.1892$ , Flack parameter =  $0.02(6)$ , 4942 independent reflections [ $2\theta \leq 147.978^\circ$ ] and 473 parameters.

The main molecule has a whole molecule disorder. The atomic displacement parameters of the diazaborinate and phenyl atoms B1\_1 to C6\_21 were restraint with RIGU keyword in ShelXL input with esd = 0.016 ('enhanced rigid bond' restraint for all bonds in the connectivity list). The displacement parameters of the diazaborinate and phenyl atoms B1\_1 to C6\_21 were restrained to the same value with similarity restraint SIMU with esd = 0.016. The  $U_{ii}$  displacement parameters of the diazaborinate and phenyl atoms B1\_1 to C6\_21 were restrained with ISOR keyword to approximate isotropic behavior. Idealized geometry for the phenyl groups were constrained using AFIX 66. A third whole molecule disorder was refined isotropically and is constrained using AFIX 6. A constant  $U_{ii}$  value of 0.05576 was obtained by free refinement of  $U_{ii}$  with a free variable using SIMU for the whole diazaborinate molecule.

CCDC number: 2453536

**Lithium 3-phenyl-4-bis(methyl)-4,3-borazaroisoquinolinatate (**5Me[Li]**)**

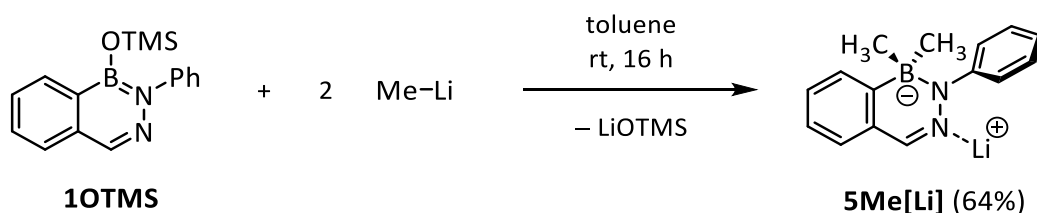

In a glovebox, compound **1OTMS** (134 mg, 455  $\mu\text{mol}$ , 1.00 eq.) was dissolved in toluene (2 mL) and a few drops of diethyl ether in a glass vial equipped with a stirring bar. Solid methyllithium  $\text{MeLi}(\text{OEt}_2)_{0.25}$  (36.1 mg, 910  $\mu\text{mol}$ , 2.00 eq.) was added in portions at ambient temperature. Upon addition, no immediate solid formation was observed. After approx. 1 h, the precipitation of a solid was observed. The reaction suspension was stirred for 2 d in the glovebox at ambient temperature. The solid was separated via pipet filtration and the filter cake was washed with cold toluene ( $2 \times 1 \text{ mL}$ ), *n*-pentane ( $1 \times 1 \text{ mL}$ ) and briefly dried *in vacuo*. **Yield of  $5\text{Me}[\text{Li}](\text{OEt}_2)_2$** : 113 mg (290  $\mu\text{mol}$ , 64%), yellow solid. To obtain the adduct  **$5\text{Me}[\text{Li}](\text{thf})_{2.5}$** , some of the solid was re-dissolved in tetrahydrofuran (1 mL) and the solvent was removed under reduced pressure.

**$^1\text{H}$  NMR** (600 MHz, 298 K,  $\text{C}_6\text{D}_6$ ):  $\delta$  = 7.94 (d,  $^3J_{\text{HH}}$  = 7.25 Hz, 1H, *H*-3), 7.49-7.52 (m, 2H, *H*-9), 7.37 (td,  $^3J_{\text{HH}}$  = 7.34 Hz,  $^4J_{\text{HH}}$  = 1.25 Hz, 1H, *H*-4), 7.19-7.24 (m, 2H, *H*-10), 7.18 (td,  $^3J_{\text{HH}}$  = 7.35 Hz,  $^4J_{\text{HH}}$  = 1.34 Hz, 2H, *H*-5)\*<sup>1</sup>, 7.09 (d,  $^3J_{\text{HH}}$  = 7.45 Hz, 1H, *H*-6), 6.92 (s, 1H, *H*-1), 6.83 (tt,  $^3J_{\text{HH}}$  = 7.27 Hz,  $^4J_{\text{HH}}$  = 1.07 Hz, 1H, *H*-11), 3.15-3.21 (m, 10H,  $2.5 \times \text{CH}_2\text{-thf}$ ), 1.24-1.30 (m, 10H,  $2.5 \times \text{CH}_2\text{-thf}$ ), 0.74 (s, 6H,  $2 \times \text{CH}_3$ ) ppm.  **$^7\text{Li}$  NMR** (233 MHz, 298 K,  $\text{C}_6\text{D}_6$ )  $\delta$  = -0.36 (s) ppm.  **$^{11}\text{B}$  NMR** (128 MHz, 298 K,  $\text{C}_6\text{D}_6$ )  $\delta$  = -7.1 (br s) ppm.  **$^{13}\text{C}\{^1\text{H}^{11}\text{B}\}$  NMR** (151 MHz, 298 K,  $\text{C}_6\text{D}_6$ )  $\delta$  = 158.9 ( $\text{C}_q^{\text{B-7}}$ ), 154.3 ( $\text{C}_q^{\text{N-8}}$ ), 140.0 (C-1), 131.4 (C-3), 131.2 (C-2), 129.4 (C-4), 129.3 (C-10), 123.9 (C-5), 123.8 (C-6), 120.2 (C-9), 119.5 (C-11), 68.2 ( $\text{CH}_2\text{-thf}$ ), 25.4 ( $\text{CH}_2\text{-thf}$ ), 12.2 ( $\text{CH}_3$ ) ppm. **HRMS** (LIFDI, toluene): expected:  $m/z$  235.1516, 236.1479, 237.1513 [ $\text{C}_{15}\text{H}_{16}\text{BN}_2+\text{H}$ ]<sup>+</sup>; found:  $m/z$  235.1513, 236.1476, 237.1513 [ $\text{C}_{15}\text{H}_{16}\text{BN}_2+\text{H}$ ]<sup>+</sup>. Crystalline material of  **$5\text{Me}[\text{Li}](\text{OEt}_2)_2$**  as yellow blocks for single-crystal XRD was obtained by storing a saturated diethyl ether solution at -30 °C for 2 d in a glovebox whilst passive diffusion of *n*-pentane.

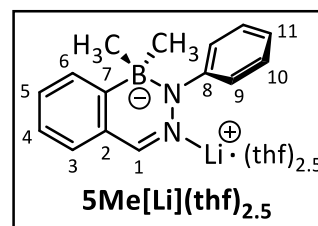

\*<sup>1</sup> Superimposed with  $\text{C}_6\text{D}_6$  solvent signal. Assigned with  $^1\text{H}/^1\text{H}$  COSY NMR and  $^1\text{H}/^{13}\text{C}$  HSQC NMR spectra.

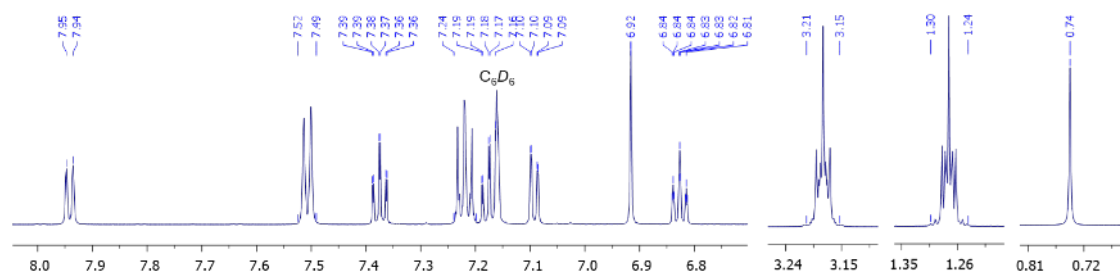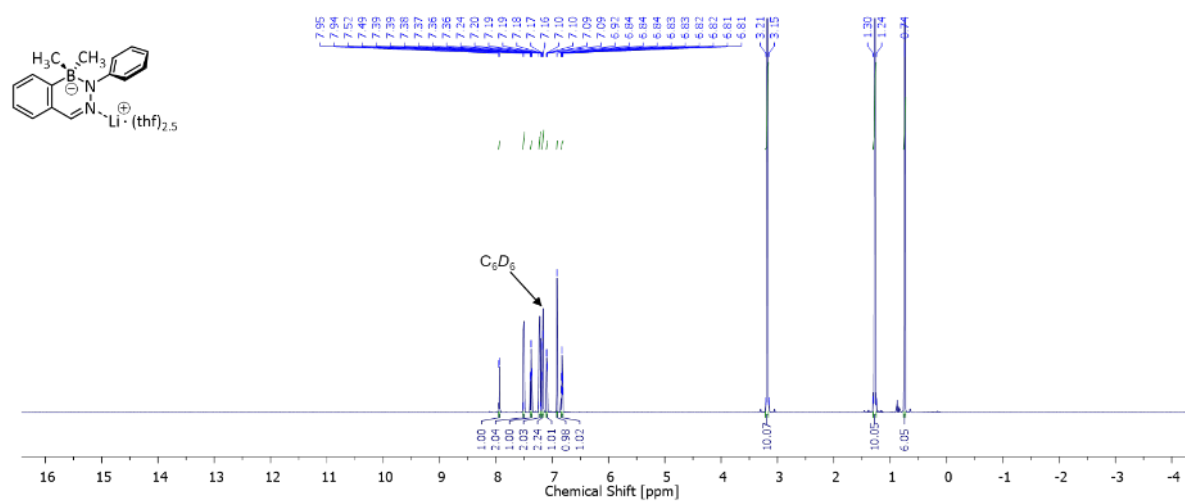

**Fig. S42** <sup>1</sup>H NMR spectrum of compound **5Me[Li](thf)<sub>2.5</sub>** in  $C_6D_6$ .

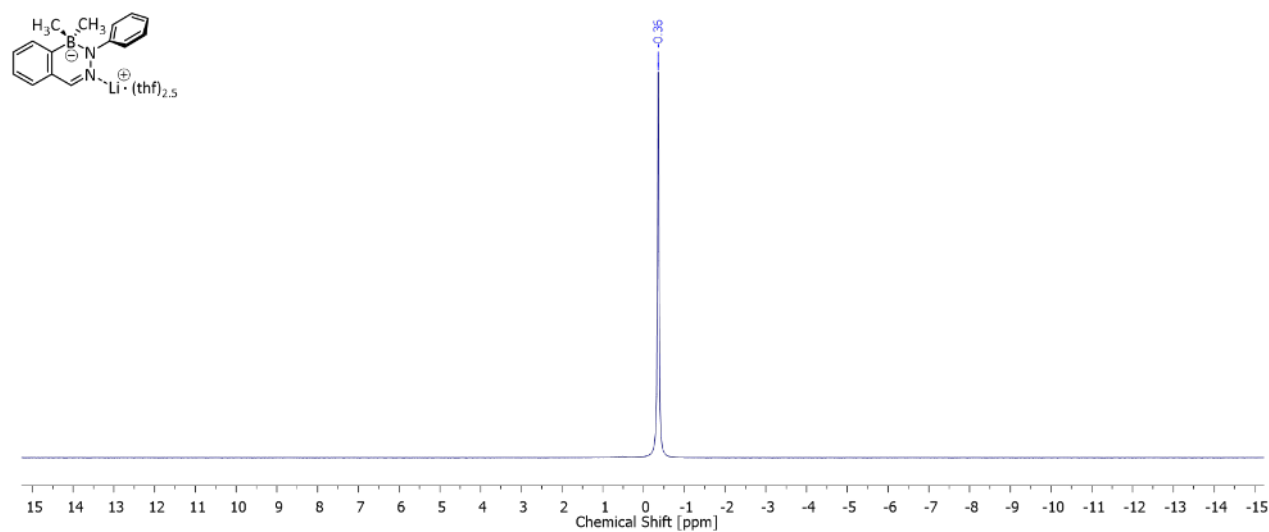

**Fig. S43** <sup>7</sup>Li NMR spectrum of compound **5Me[Li](thf)<sub>2.5</sub>** in  $C_6D_6$ .

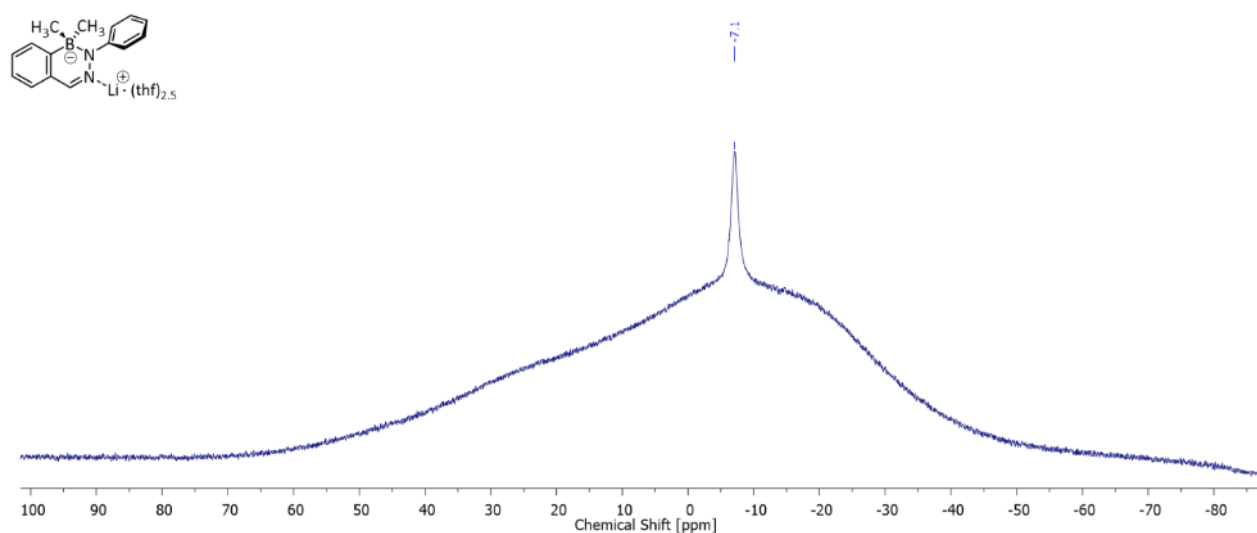

**Fig. S44**  $^{11}\text{B}$  NMR spectrum of compound  $5\text{Me}[\text{Li}](\text{thf})_{2.5}$  in  $\text{C}_6\text{D}_6$ .

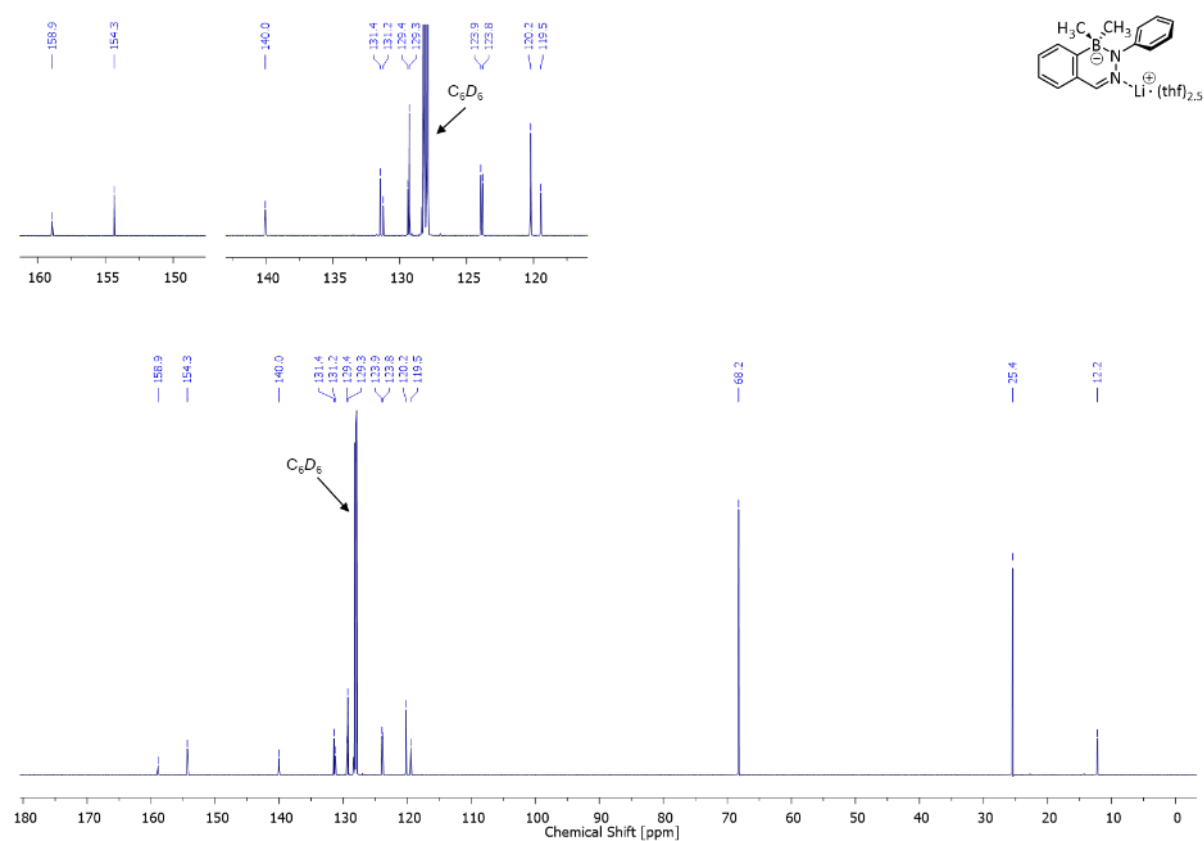

**Fig. S45**  $^{13}\text{C}\{^1\text{H}^{11}\text{B}\}$  NMR spectrum of compound  $5\text{Me}[\text{Li}](\text{thf})_{2.5}$  in  $\text{C}_6\text{D}_6$  (decoupled at  $-7$  ppm).

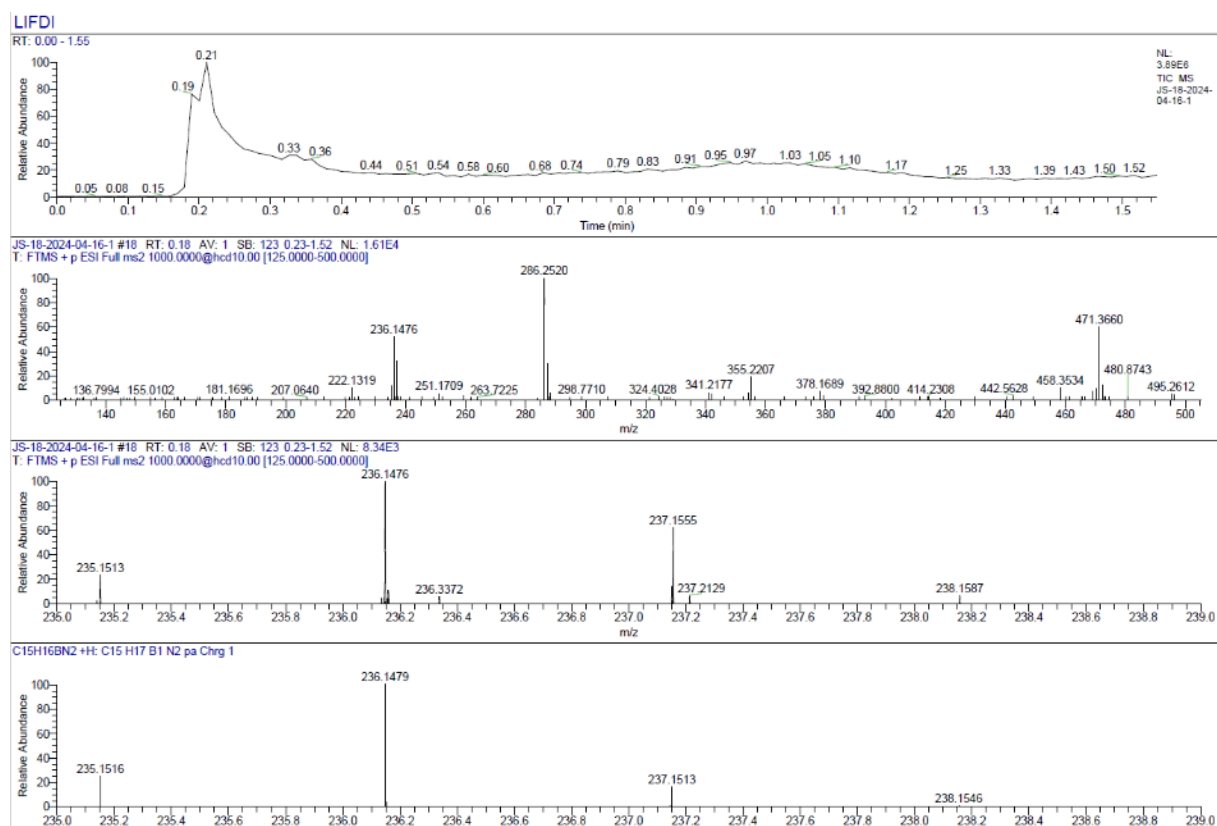

**Fig. S46** LIFDI mass spectrum of compound **5Me[Li](thf)<sub>2.5</sub>** (toluene).

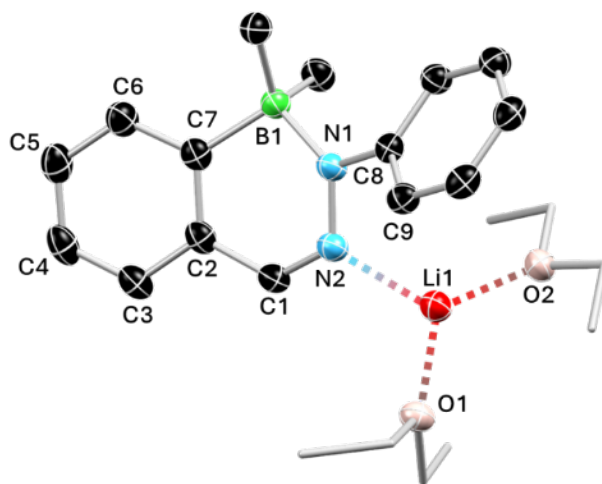

**Fig. S47** Molecular structure of compound **5Me[Li](OEt)<sub>2</sub>**. Ellipsoids drawn at 50% probability (100 K). All H-atoms omitted. Complexing ether rendered as wireframe for clarity. Selected bond lengths (Å) and angles (°) of **5Me[Li](OEt)<sub>2</sub>**: N2–Li1 2.017(2), B1–N1 1.6073(15), N1–N2 1.3735(13), N2–C1 1.3010(15), C1–C2 1.4500(16), C2–C3 1.4038(15), C3–C4 1.3829(18), C4–C5 1.3855(19), C5–C6 1.3930(17), C6–C7 1.3967(16), C2–C7 1.4092(16), C7–B1 1.6237(16), N1–C8 1.4012(14), B1–N1–N2–C1 17.32(15), B1–C7–C2–C1 10.21(15), N2–N1–C8–C9 41.00(13).

Crystal data:  $C_{23}H_{36}BLiN_2O_2$ ,  $M_r = 390.29$ , yellow block,  $0.780 \times 0.330 \times 0.110$  mm<sup>3</sup>, orthorhombic space group *Pbca*,  $a = 14.84100(10)$  Å,  $b = 17.19650(10)$  Å,  $c = 18.57070(10)$  Å,  $V = 4739.49(5)$  Å<sup>3</sup>,  $Z = 8$ ,  $\rho_{\text{calcd}} = 1.094$  g·cm<sup>-3</sup>,  $\mu = 0.522$  mm<sup>-1</sup>,  $F(000) = 1696$ ,  $T = 100(2)$  K,  $R_1 = 0.0451$ ,  $wR_2 = 0.1118$ , 4810 independent reflections [ $2\theta \leq 150.478^\circ$ ] and 268 parameters.

CCDC number: 2453540

**Lithium 3-phenyl-4-bis(thienyl)-4,3-borazaroisoquinolate (5Thio[Li])**

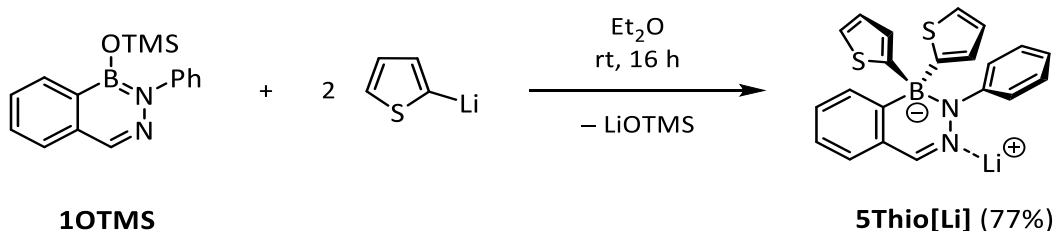

In a glovebox, compound **1OTMS** (100 mg, 340  $\mu\text{mol}$ , 1.00 eq.) was dissolved in diethyl ether (2 mL) in a glass vial equipped with a stirring bar. 2-Thienyllithium (61.2 mg, 680  $\mu\text{mol}$ , 2.00 eq.) was added in portions at ambient temperature. Upon addition, the immediate formation of a pale-yellow solid was observed. The reaction suspension was stirred for 16 h in the glovebox at ambient temperature. The solid was separated via pipet filtration and the filter cake was washed with cold toluene ( $2 \times 1$  mL), *n*-pentane ( $1 \times 1$  mL) and briefly dried *in vacuo*. To obtain the adduct **5Thio[Li](thf)<sub>3</sub>**, the solid was re-dissolved in tetrahydrofuran (1 mL) and the solvent was removed under reduced pressure. **Yield of 5Thio[Li](thf)<sub>3</sub>**: 157 mg (264  $\mu\text{mol}$ , 77%), pale-yellow, crystalline solid.

**<sup>1</sup>H NMR** (500 MHz, 298 K, C<sub>6</sub>D<sub>6</sub>):  $\delta$  = 7.70 (d,  $^3J_{\text{HH}}$  = 7.23 Hz, 1H, *H*-3), 7.49 (dd,  $^3J_{\text{HH}}$  = 3.26 Hz,  $^4J_{\text{HH}}$  = 1.03 Hz, 2H, *H*-13), 7.45-7.48 (m, 2H, *H*-9), 7.30 (dd,  $^3J_{\text{HH}}$  = 4.72 Hz,  $^4J_{\text{HH}}$  = 0.95 Hz, 2H, *H*-15), 7.27 (ddd,  $^3J_{\text{HH}}$  = 7.36 Hz, 6.39 Hz,  $^4J_{\text{HH}}$  = 2.14 Hz, 1H, *H*-4), 7.22 (s, 1H, *H*-1), 7.17-7.21 (m, 2H, *H*-5 + *H*-6), 7.14-7.17 (m, 5H, *H*-14)\*<sup>1</sup>, 6.99-7.04 (m, 2H, *H*-10), 6.66 (tt,  $^3J_{\text{HH}}$  = 7.19 Hz,  $^4J_{\text{HH}}$  = 1.20 Hz, 1H, *H*-11), 3.12-3.16 (m, 12H, 3  $\times$  CH<sub>2</sub>-thf),

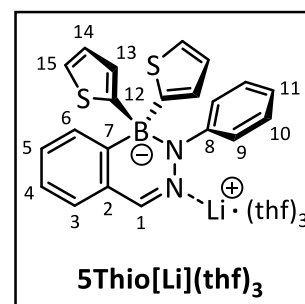

1.21-1.26 (m, 12H, 3  $\times$  CH<sub>2</sub>-thf) ppm. **<sup>7</sup>Li NMR** (194 MHz, 298 K, C<sub>6</sub>D<sub>6</sub>)  $\delta$  = -0.36 (s) ppm. **<sup>11</sup>B NMR** (160 MHz, 298 K, C<sub>6</sub>D<sub>6</sub>)  $\delta$  = -6.6 (s) ppm. **<sup>13</sup>C{<sup>1</sup>H<sup>11</sup>B} NMR** (151 MHz, 298 K, C<sub>6</sub>D<sub>6</sub>)  $\delta$  = 160.9 (C<sub>q</sub><sup>B</sup>-12), 152.8 (C<sub>q</sub><sup>N</sup>-8), 152.6 (C<sub>q</sub><sup>B</sup>-7), 140.6 (C-1), 134.2 (C-3), 130.3 (C<sub>q</sub>-2), 130.2 (C-13), 129.8 (C-4), 128.6 (C-10), 126.9 (C-14), 125.2 (C-15), 125.0 (C-5), 123.5 (C-6), 120.0 (C-9), 119.2 (C-11), 68.2 (CH<sub>2</sub>-thf), 25.4 (CH<sub>2</sub>-thf) ppm. **HRMS** (LIFDI, toluene): expected: *m/z* 371.0957, 372.0921, 373.0954 [C<sub>21</sub>H<sub>16</sub>BN<sub>2</sub>S<sub>2</sub>+H]<sup>+</sup>; found: *m/z* 371.0952, 372.0915, 373.0950 [C<sub>21</sub>H<sub>16</sub>BN<sub>2</sub>S<sub>2</sub>+H]<sup>+</sup>. Crystalline material of **5Thio[Li](OEt<sub>2</sub>)<sub>2</sub>** as colorless blocks for single-crystal XRD was obtained by storing the supernatant reaction solution, combined with the toluene wash solution at -30 °C for 2 d in a glovebox.

\*<sup>1</sup> Superimposed with C<sub>6</sub>D<sub>6</sub> solvent signal. Assigned with <sup>1</sup>H/<sup>1</sup>H COSY NMR and <sup>1</sup>H/<sup>13</sup>C HSQC NMR spectra



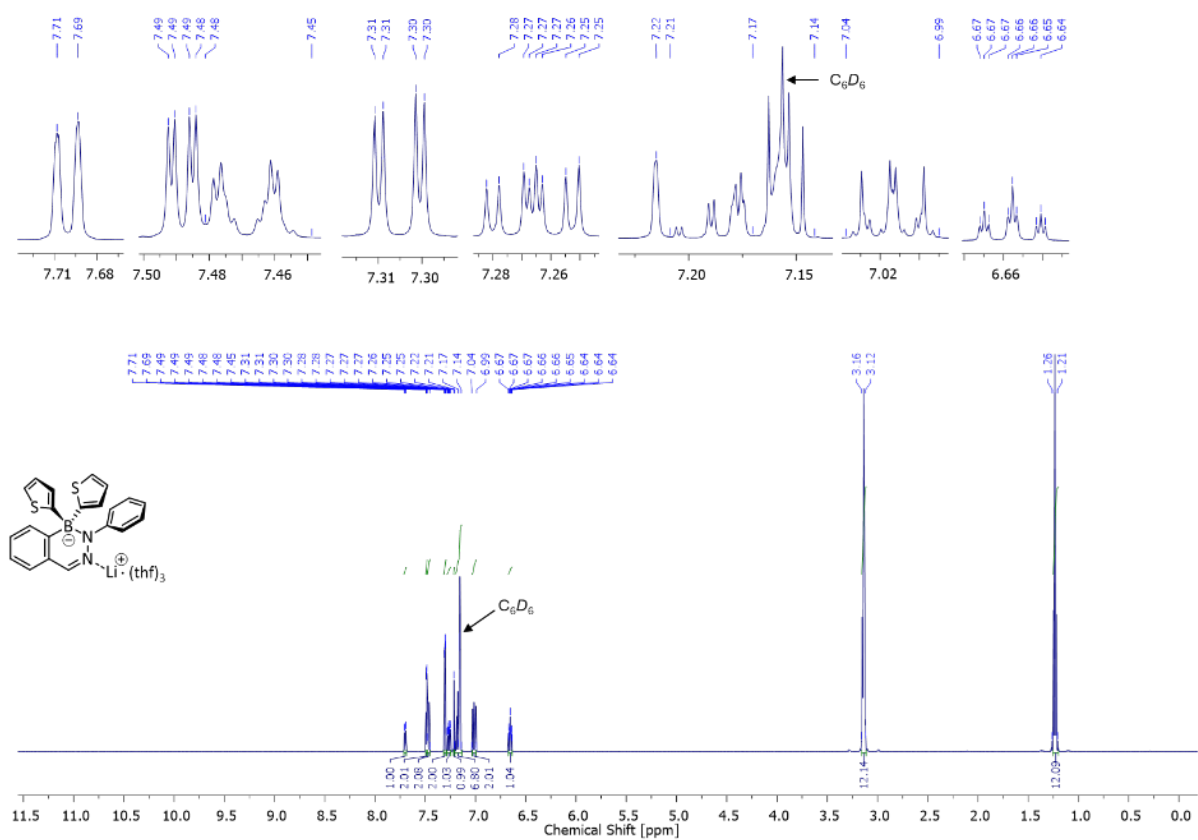

**Fig. S48** <sup>1</sup>H NMR spectrum of compound **5Thio[Li](thf)<sub>3</sub>** in C<sub>6</sub>D<sub>6</sub>.

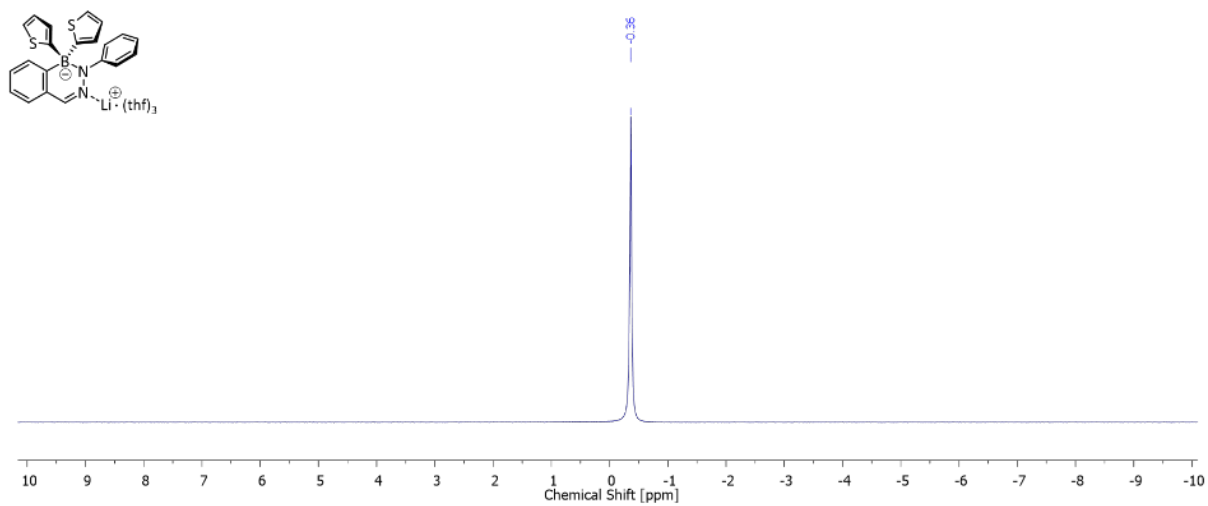

**Fig. S49** <sup>7</sup>Li NMR spectrum of compound **5Thio[Li](thf)<sub>3</sub>** in C<sub>6</sub>D<sub>6</sub>.

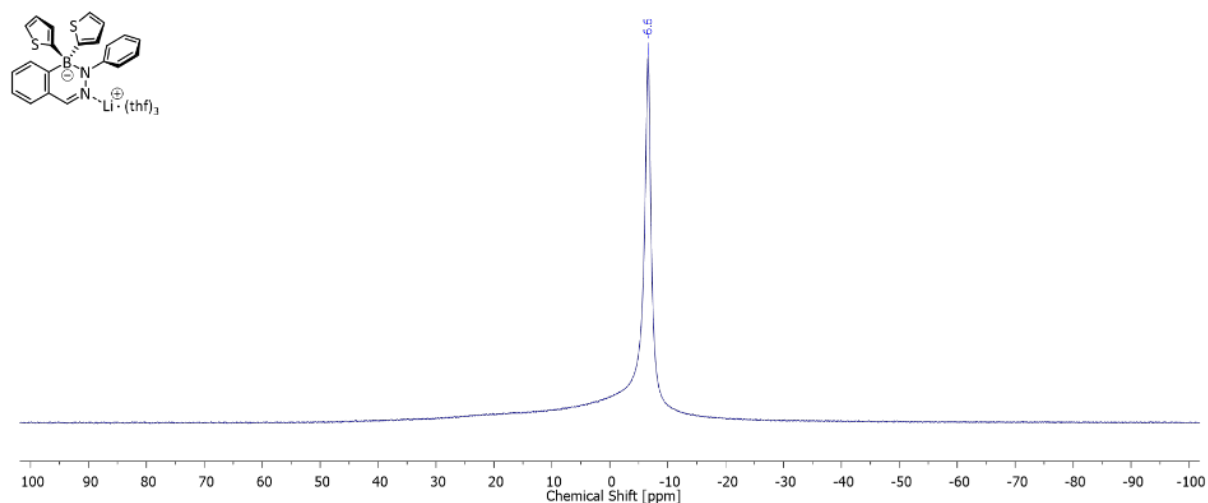

**Fig. S50** Background-reduced  $^{11}\text{B}$  NMR spectrum of compound **5Thio[Li](thf)<sub>3</sub>** in  $\text{C}_6\text{D}_6$ .

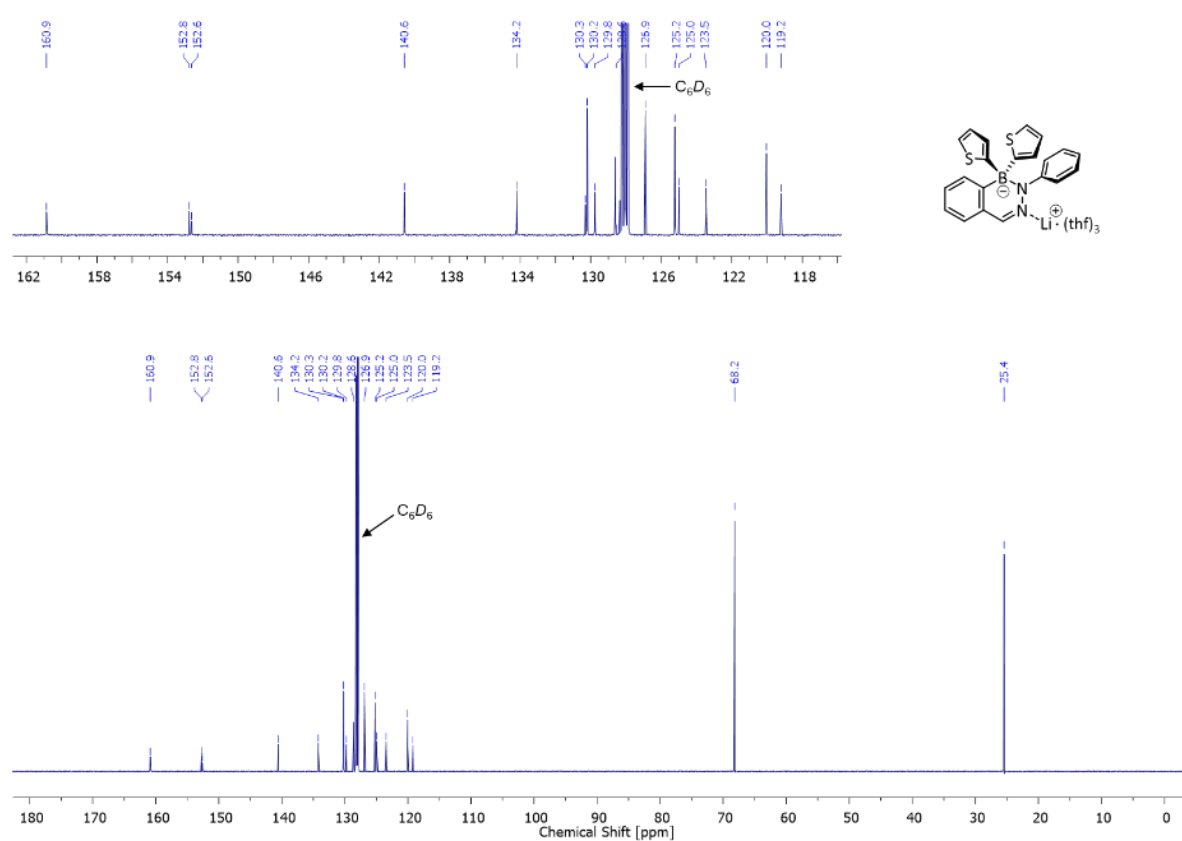

**Fig. S51**  $^{13}\text{C}\{^1\text{H}^{11}\text{B}\}$  NMR spectrum of compound **5Thio[Li](thf)<sub>3</sub>** in  $\text{C}_6\text{D}_6$  (decoupled at -7 ppm).

# LIFDI

RT: 0.00 - 2.17

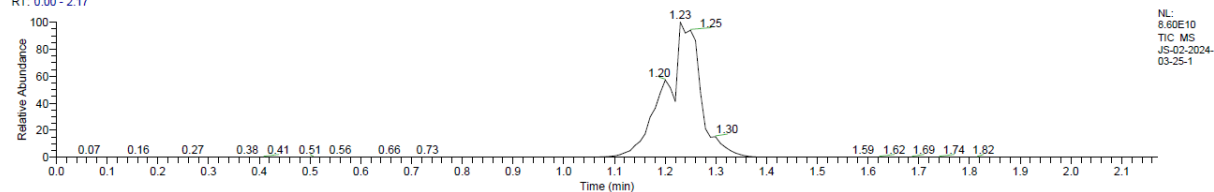

JS-02-2024-03-25-1 #32-51 RT: 0.33-0.54 AV: 20 NL: 8.75E4

T: FTMS + p ESI Full ms2 1000.0000@hcd10.00 [150.0000-1000.0000]

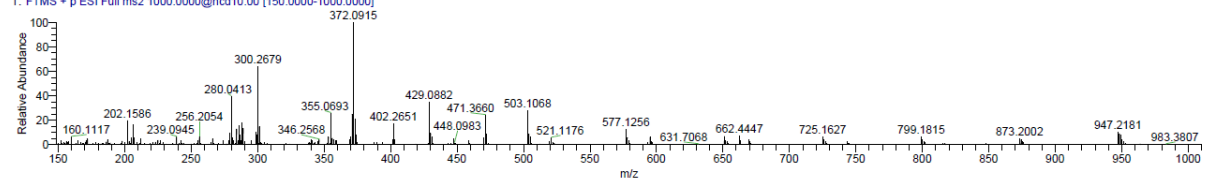

JS-02-2024-03-25-1 #32-51 RT: 0.33-0.54 AV: 20 NL: 8.75E4

T: FTMS + p ESI Full ms2 1000.0000@hcd10.00 [150.0000-1000.0000]

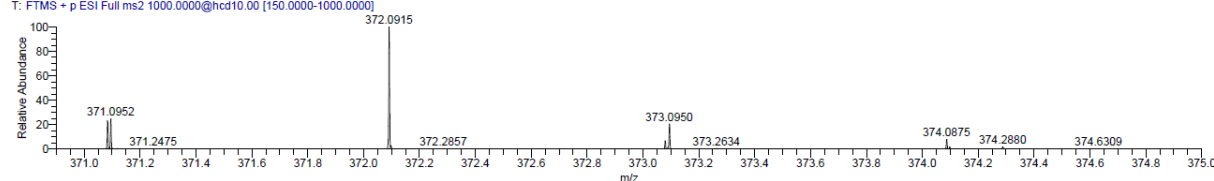

C21H16BN2S2 +H: C21 H17 B1 N2 S2 pa Chrg 1

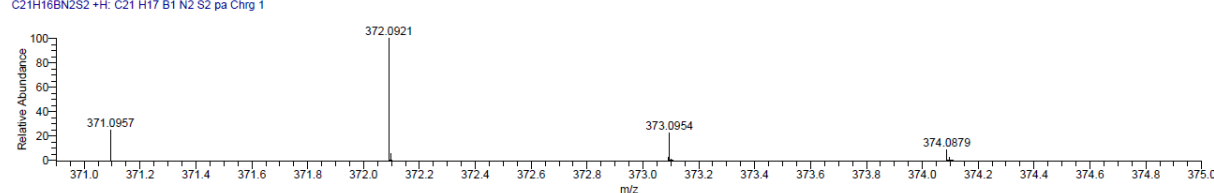

**Fig. S52**

LIFDI mass spectrum of compound **5Thio[Li]** (toluene).

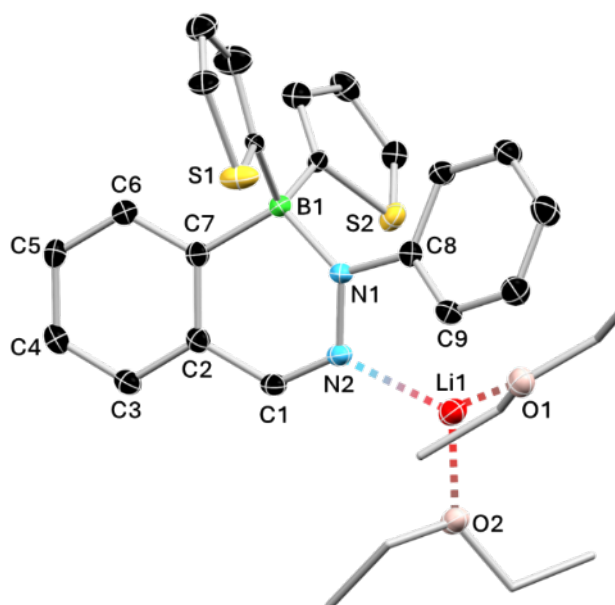

**Fig. S53** Molecular structure of compound **5Thio[Li](OEt)<sub>2</sub>**. Ellipsoids drawn at 50% probability (100 K). All H-atoms omitted. Complexing ether rendered as wireframe for clarity. Selected bond lengths (Å) and angles (°) of **5Thio[Li](OEt)<sub>2</sub>**: N2–Li1 2.072(3), B1–N1 1.581(2), N1–N2 1.3759(18), N2–C1 1.293(2), C1–C2 1.453(2), C2–C3 1.407(2), C3–C4 1.385(2), C4–C5 1.395(2), C5–C6 1.388(2), C6–C7 1.399(2), C2–C7 1.402(2), C7–B1 1.624(2), N1–C8 1.404(2), B1–N1–N2–C1 18.7(2), B1–C7–C2–C1 1.7(2), N2–N1–C8–C9 28.8(2).

Crystal data: C<sub>29</sub>H<sub>36</sub>BLiN<sub>2</sub>O<sub>2</sub>S<sub>2</sub>, *M<sub>r</sub>* = 526.47, colorless block, 0.210×0.130×0.070 mm<sup>3</sup>, orthorhombic space group *Pna*2<sub>1</sub>, *a* = 16.02590(10) Å, *b* = 17.59330(10) Å, *c* = 10.05670(10) Å, *V* = 2835.47(4) Å<sup>3</sup>, *Z* = 4,  $\rho_{\text{calcd}}$  = 1.233 g·cm<sup>−3</sup>,  $\mu$  = 1.915 mm<sup>−1</sup>, *F*(000) = 1120, *T* = 100(2) K, *R*<sub>1</sub> = 0.0222, *wR*<sub>2</sub> = 0.0588, Flack parameter = 0.002(3), 5666 independent reflections [*2*θ ≤ 149.79°] and 430 parameters.

Both thiophene molecules are disordered. The atomic displacement parameters of all thiophene atoms S1\_3 to C4\_41 were restraint with RIGU keyword in ShelXL input with esd = 0.008 ('enhanced rigid bond' restraint for all bonds in the connectivity list). The displacement parameters of all thiophene atoms S1\_3 to C4\_41 were restrained to the same value with similarity restraint SIMU (esd = 0.008). The U<sub>ii</sub> displacement parameters of all thiophene atoms S1\_3 to C4\_41 were restrained with ISOR keyword with esd = 0.008 to approximate isotropic behavior. The distances between atoms B1\_1 and C1\_3 and B1\_1 and C1\_31 were restrained during refinement to the same value using SADI. The distances between atoms B1\_1 and C1\_4 and B1\_1 and C1\_41 were restrained during refinement to the same value using SADI.

CCDC number: 2453538

**Lithium 3-phenyl-4-bis(4-(trifluoromethyl)phenyl)-4,3-borazaroisoquinolinatate (**5CF<sub>3</sub>[Li]**)**

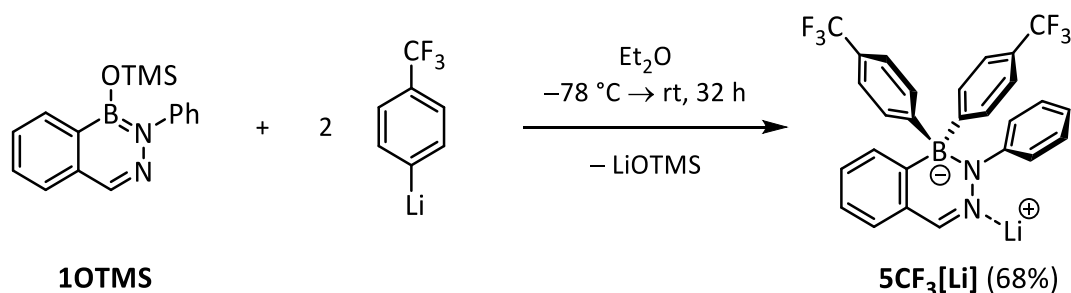

4-Bromobenzotrifluoride (238  $\mu\text{L}$ , 1.70 mmol, 2.00 eq.,  $\rho = 1.61\text{ g/mL}$ ) was dissolved in diethyl ether (10 mL) in a 50 mL Schlenk tube and cooled to  $-78^\circ\text{C}$  (*i*PrOH/dry ice). Slowly, *n*-butyllithium (1.6 M solution in *n*-hexane, 1.06 mL, 1.70 mmol, 2.00 eq.) was added under moderate stirring and the colorless reaction mixture was stirred for 2 h at  $-78^\circ\text{C}$ . A gradual color change to light brown was observed over the course of the lithiation. Compound **1OTMS** (250 mg, 850  $\mu\text{mol}$ , 1.00 eq.) was dissolved in diethyl ether (4 mL) in a 100 mL Schlenk flask and cooled to  $-78^\circ\text{C}$  (*i*PrOH/dry ice). Then, the freshly prepared 4-(trifluoromethyl)phenyl lithium solution was added dropwise to compound **1OTMS**. Upon addition, a color change from colorless to orange and no initial solid formation was observed. The reaction was stirred for 5 min at  $-78^\circ\text{C}$ . After 5 min, the cooling bath was removed, half of the solvent was evaporated under reduced pressure until the sudden formation of a pale orange solid was observed. The suspension was stirred for 32 h at ambient temperature. After 32 h, the suspension was filtrated via a filter pipet in a glovebox and the filter cake was washed with cold diethyl ether (1  $\times$  1 mL), cold toluene (2  $\times$  2 mL), *n*-pentane (1  $\times$  1 mL) and briefly dried *in vacuo*. **Yield of 5CF<sub>3</sub>[Li](OEt<sub>2</sub>)<sub>2</sub>**: 376 mg (578  $\mu\text{mol}$ , 68%), pale gray-green powder. To obtain the adduct **5CF<sub>3</sub>[Li](thf)<sub>3</sub>**, some of the solid was re-dissolved in tetrahydrofuran (1 mL) and the solvent was removed under reduced pressure.

**<sup>1</sup>H NMR** (500 MHz, 298 K, C<sub>6</sub>D<sub>6</sub>):  $\delta = 7.84$  (d,  $^3J_{\text{HH}} = 7.80\text{ Hz}$ , 4H, *H*-13), 7.51-7.55 (m, 4H, *H*-14), 7.28-7.31 (m, 1H, *H*-3), 7.26 (td,  $^3J_{\text{HH}} = 7.11\text{ Hz}$ ,  $^4J_{\text{HH}} = 1.31\text{ Hz}$ , 1H, *H*-4), 7.17 (td,  $^3J_{\text{HH}} = 7.29\text{ Hz}$ ,  $^4J_{\text{HH}} = 1.47\text{ Hz}$ , 5H, *H*-5)\*<sup>1</sup>, 7.09-7.12 (m, 2H, *H*-1 + *H*-6), 7.04-7.08 (m, 2H, *H*-9), 6.85-6.89 (m, 2H, *H*-10), 6.55 (tt,  $^3J_{\text{HH}} = 7.23\text{ Hz}$ ,  $^4J_{\text{HH}} = 1.11\text{ Hz}$ , 1H, *H*-11), 3.03-3.08 (m, 11H, 2.75  $\times$  CH<sub>2</sub>-thf)\*<sup>2</sup>, 1.16-1.23 (m, 11H, 2.75  $\times$  CH<sub>2</sub>-thf)\*<sup>2</sup> ppm.

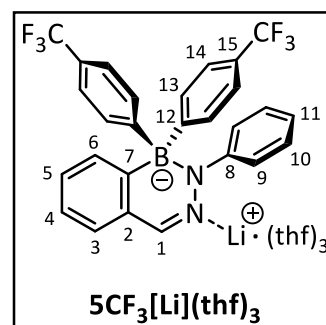

**<sup>7</sup>Li NMR** (194 MHz, 298 K, C<sub>6</sub>D<sub>6</sub>)  $\delta = -0.26$  (s) ppm. **<sup>11</sup>B NMR** (160 MHz, 298 K, C<sub>6</sub>D<sub>6</sub>)  $\delta = -3.6$  (br s) ppm. **<sup>13</sup>C{<sup>1</sup>H<sup>11</sup>B} NMR** (151 MHz, 298 K, C<sub>6</sub>D<sub>6</sub>)  $\delta = 162.5$  (C<sub>q</sub><sup>B</sup>-12), 152.6 (C<sub>q</sub><sup>N</sup>-8), 152.4 (C<sub>q</sub><sup>B</sup>-7), 141.2 (C-1), 135.2 (C-13), 133.8 (C-3), 130.8 (C-2), 130.1 (C-4), 128.8 (C-10), 126.4 (q,  $^1J_{\text{CF}} = 271.3\text{ Hz}$ , CF<sub>3</sub>), 126.3 (q,  $^2J_{\text{CF}} = 31.1\text{ Hz}$ , C<sub>q</sub>-15), 125.0 (C-5), 123.6 (C-6), 123.4 (q,  $^3J_{\text{CF}} = 4.13\text{ Hz}$ , C-14), 119.7 (C-9), 119.4 (C-11), 68.2 (CH<sub>2</sub>-thf), 25.3 (CH<sub>2</sub>-thf) ppm. **<sup>19</sup>F{<sup>1</sup>H<sup>11</sup>B} NMR** (471 MHz, 298 K, C<sub>6</sub>D<sub>6</sub>)  $\delta = -61.2$  (s) ppm.

**HRMS** (LIFDI, toluene): expected:  $m/z$  494.1498, 495.1462, 496.1495  $[\text{C}_{27}\text{H}_{18}\text{BF}_6\text{N}_2]^+$ ; found:  $m/z$  494.1492, 495.1455, 496.1498  $[\text{C}_{27}\text{H}_{18}\text{BF}_6\text{N}_2]^+$ . Crystalline material of **5CF<sub>3</sub>[Li](OEt)<sub>2</sub>** as yellow blocks for single-crystal XRD was obtained by storing the combined washing solutions at  $-30\text{ }^\circ\text{C}$  in a glovebox.

\*<sup>1</sup> Superimposed with  $\text{C}_6\text{D}_6$  solvent signal. Assigned with  $^1\text{H}/^1\text{H}$  COSY NMR and  $^1\text{H}/^{13}\text{C}$  HSQC NMR spectra.

\*<sup>2</sup> The thf equivalents are rounded to three in the compounds name and formula.

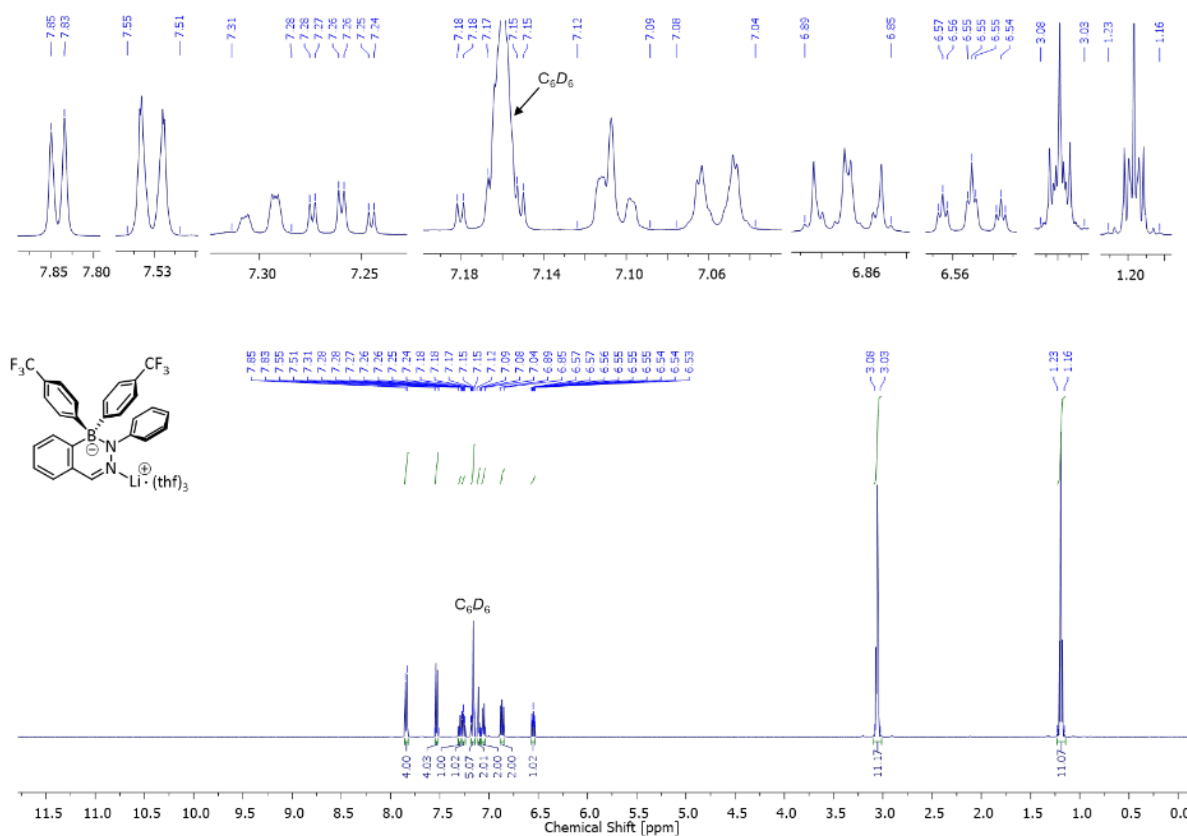

**Fig. S54**  $^1\text{H}$  NMR spectrum of compound **5CF<sub>3</sub>[Li](thf)<sub>3</sub>** in  $\text{C}_6\text{D}_6$ .

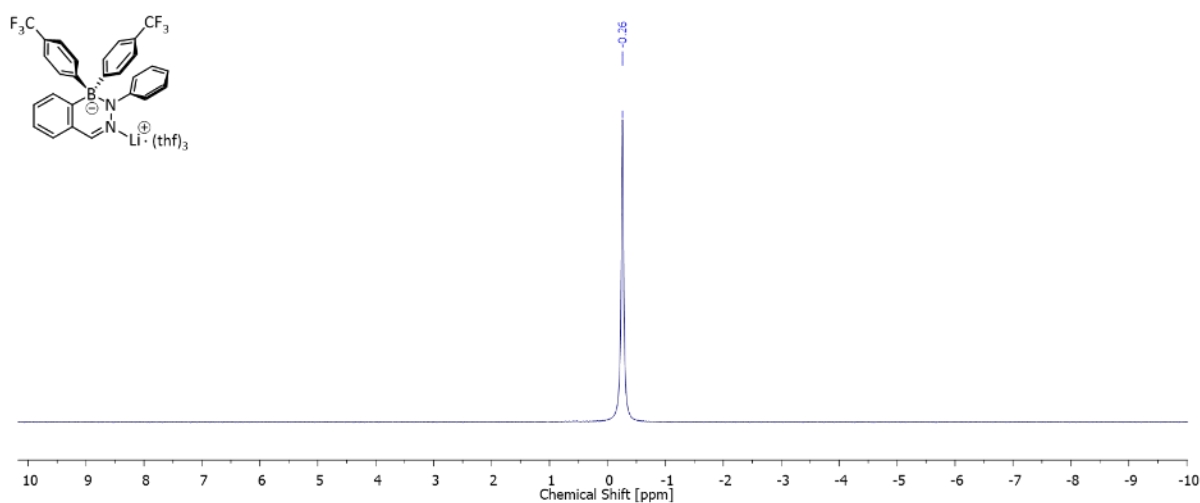

**Fig. S55**  $^7\text{Li}$  NMR spectrum of compound **5CF<sub>3</sub>[Li](thf)<sub>3</sub>** in  $\text{C}_6\text{D}_6$ .

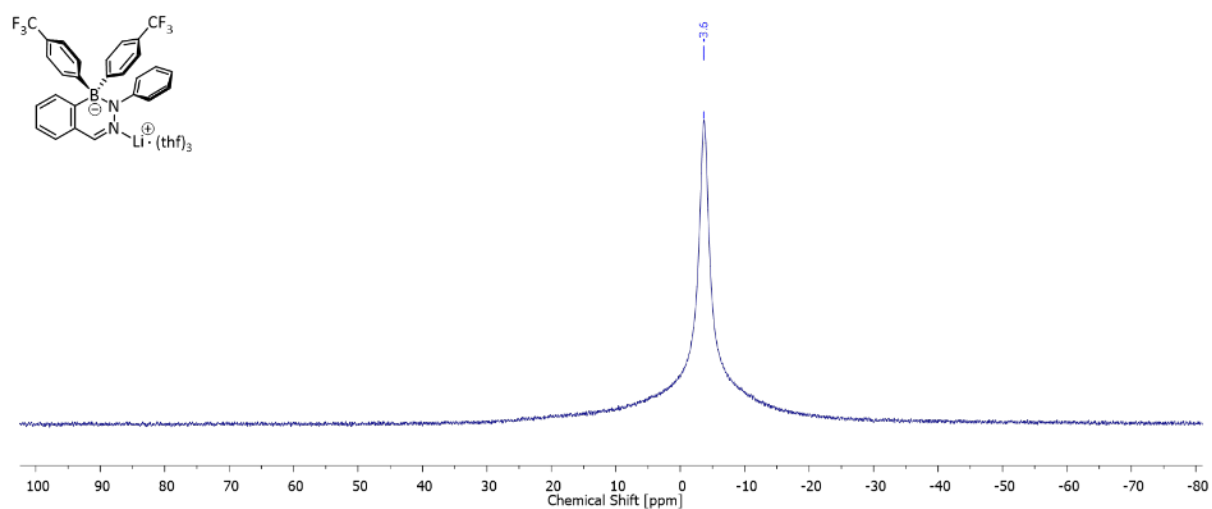

**Fig. S56** Background-reduced  $^{11}B$  NMR spectrum of compound  $5CF_3[Li](thf)_3$  in  $C_6D_6$ .

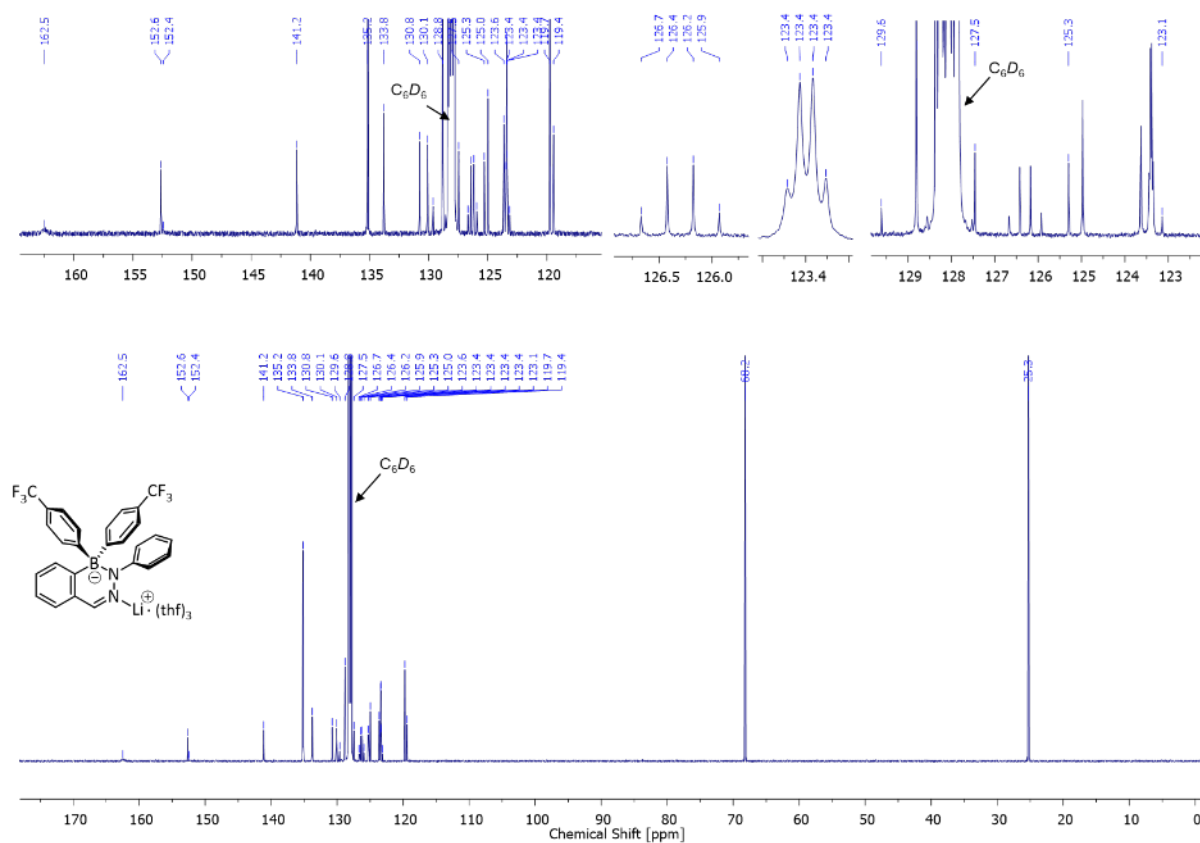

**Fig. S57**  $^{13}C\{^1H^{11}B\}$  NMR spectrum of compound  $5CF_3[Li](thf)_3$  in  $C_6D_6$  (decoupled at  $-3$  ppm).

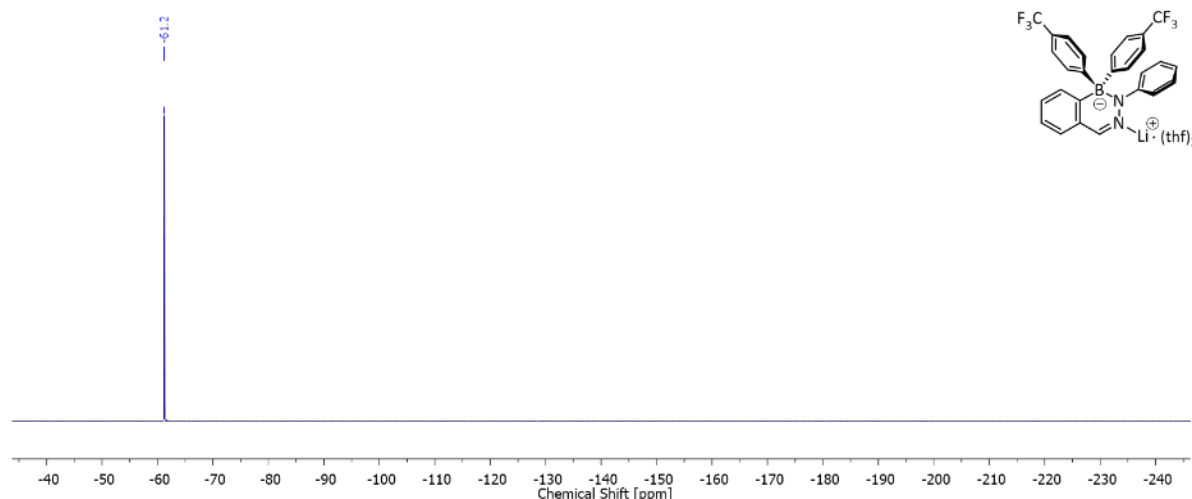

**Fig. S58**  $^{19}\text{F}\{^1\text{H}^{11}\text{B}\}$  NMR spectrum of compound **5CF<sub>3</sub>[Li](thf)<sub>3</sub>** in  $\text{C}_6\text{D}_6$ .

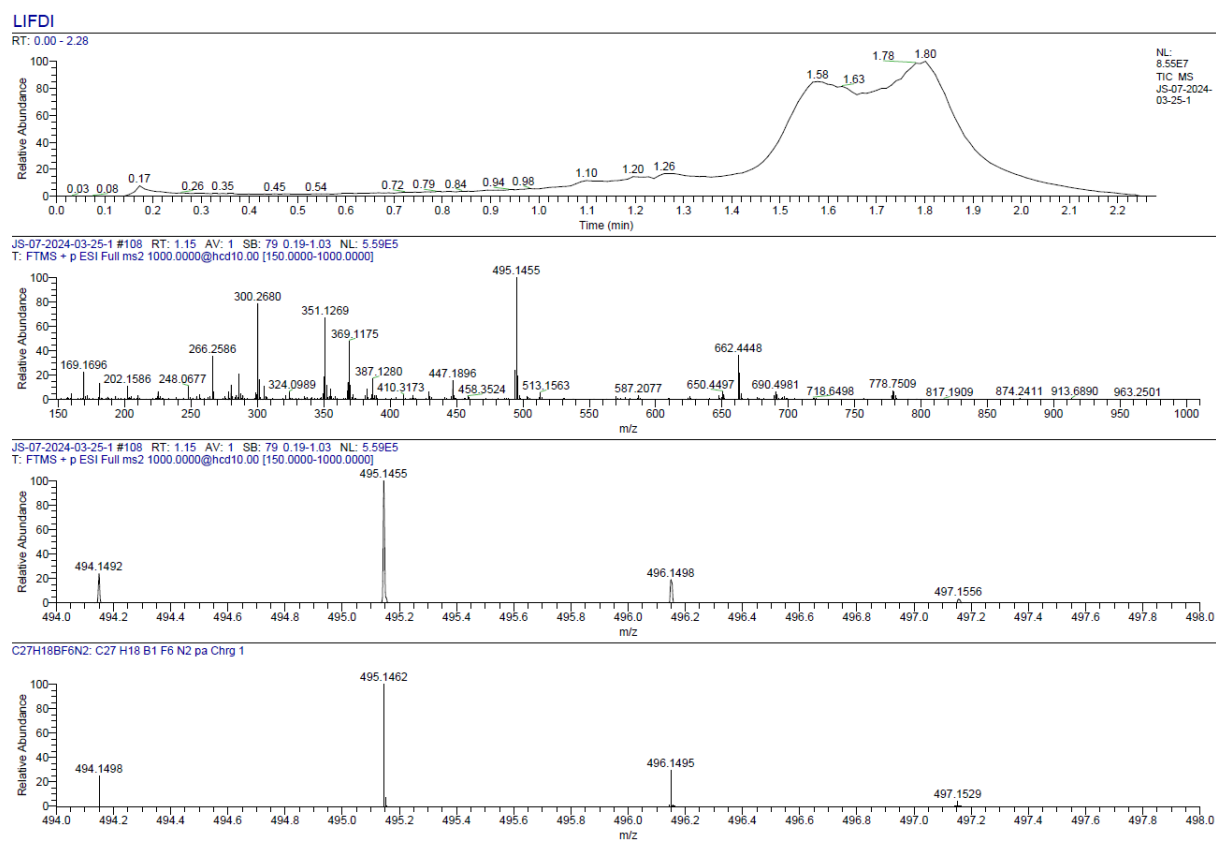

**Fig. S59** LIFDI mass spectrum of compound **5CF<sub>3</sub>[Li]** (toluene).



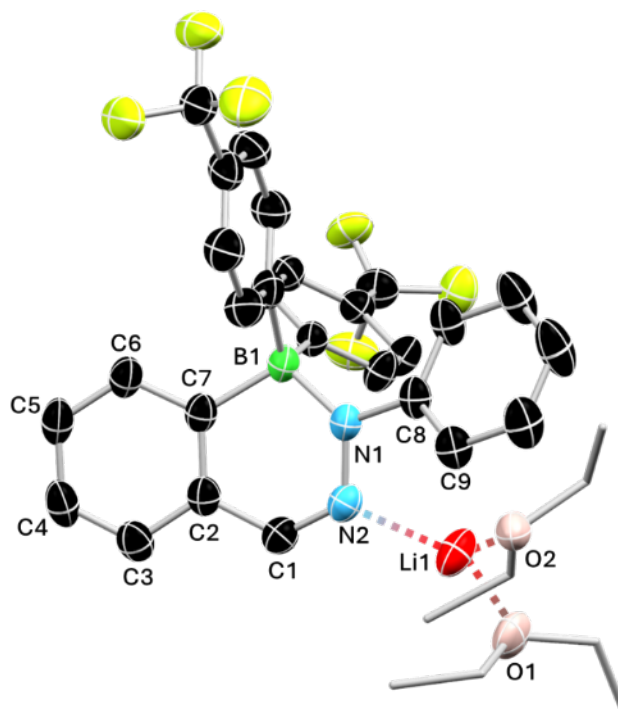

**Fig. S60** Molecular structure of compound **5CF<sub>3</sub>[Li](OEt)<sub>2</sub>**. Ellipsoids drawn at 50% probability (100 K). All H-atoms omitted. Complexing ether rendered as wireframe for clarity. Selected bond lengths (Å) and angles (°) of **5CF<sub>3</sub>[Li](OEt)<sub>2</sub>**: N2–Li1 2.047(3), B1–N1 1.5716(17), N1–N2 1.3767(15), N2–C1 1.2933(18), C1–C2 1.4532(18), C2–C3 1.3989(19), C3–C4 1.386(2), C4–C5 1.384(2), C5–C6 1.387(2), C6–C7 1.3998(18), C2–C7 1.4027(19), C7–B1 1.6205(19), N1–C8 1.4049(16), B1–N1–N2–C1 19.64(17), B1–C7–C2–C1 7.93(18), N2–N1–C8–C9 33.39(16).

Crystal data: C<sub>35</sub>H<sub>38</sub>BF<sub>6</sub>LiN<sub>2</sub>O<sub>2</sub>, *M<sub>r</sub>* = 650.42, yellow block, 0.370×0.150×0.080 mm<sup>3</sup>, monoclinic space group *P*2<sub>1</sub>/*n*, *a* = 13.06060(10) Å, *b* = 14.89200(10) Å, *c* = 17.83520(10) Å, β = 99.73°, *V* = 3419.02(4) Å<sup>3</sup>, *Z* = 4, ρ<sub>calcd</sub> = 1.264 g·cm<sup>−3</sup>, μ = 0.838 mm<sup>−1</sup>, *F*(000) = 1360, *T* = 100(2) K, *R*<sub>1</sub> = 0.0447, *wR*<sub>2</sub> = 0.1163, 6871 independent reflections [2θ ≤ 150.288°] and 590 parameters.

Both diethyl ether molecules are disordered. The atomic displacement parameters of all Et<sub>2</sub>O atoms O1\_7 to C4\_81 were restrained with RIGU (esd = 0.008) keyword in ShelXL input ('enhanced rigid bond' restraint for all bonds in the connectivity list). The displacement parameters of all Et<sub>2</sub>O atoms O1\_7 to C4\_81 were restrained to the same value with similarity restraint SIMU (esd = 0.008). The U<sub>ii</sub> displacement parameters of all Et<sub>2</sub>O atoms O1\_7 to C4\_81 were restrained with ISOR keyword (esd = 0.008) to approximate isotropic behavior. The distances between atoms Li1\_6 and O1\_7 and Li1\_6 and O1\_71 were restrained during refinement to the same value using SADI (esd = 0.002). The distances between atoms Li1\_6 and O1\_8 and Li1\_6 and O1\_81 were restrained during refinement to the same value using SADI (esd = 0.002). Both CF<sub>3</sub> groups are disordered. The atomic displacement parameters of all CF<sub>3</sub> groups atoms C1\_4 to F3\_51 were restrained with RIGU (esd = 0.008) keyword in ShelXL input ('enhanced rigid bond' restraint for all bonds in the connectivity list). The displacement parameters of all CF<sub>3</sub> groups atoms C1\_4 to F3\_51 were restrained to the same value with similarity restraint SIMU (esd = 0.008). The U<sub>ii</sub> displacement parameters of all CF<sub>3</sub> groups atoms C1\_4 to F3\_51 were restrained with ISOR keyword (esd = 0.008) to approximate isotropic behavior. The distances between atoms C4\_2 and C1\_4 and C4\_2 and C1\_41 were restrained during refinement to the same value using SADI (esd = 0.002). The distances between atoms C4\_3 and C1\_5 and C4\_3 and C1\_51 were restrained during refinement to the same value using SADI (esd = 0.002).

CCDC number: 2453544

**Lithium 3-phenyl-4-bis(4-(methoxy)phenyl)-4,3-borazaroisoquinolinate (**5OMe[Li]**)**

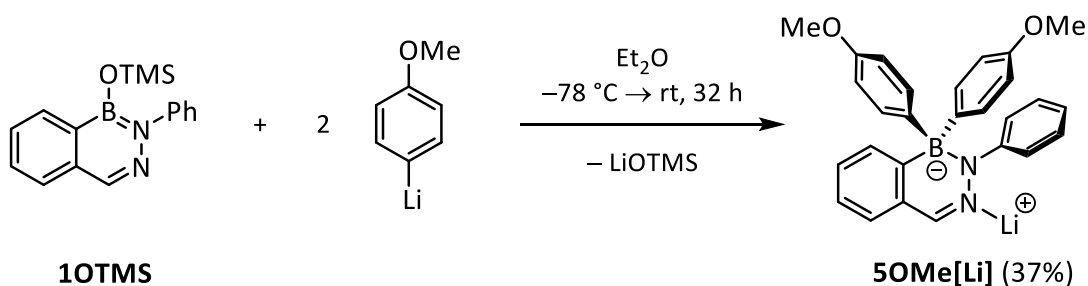

4-Bromoanisole (213  $\mu$ L, 1.70 mmol, 2.00 eq.,  $\rho$  = 1.49 g/mL) was dissolved in diethyl ether (7 mL) in a 50 mL Schlenk tube and cooled to  $-78^\circ\text{C}$  (*i*PrOH/dry ice). Slowly, *n*-butyllithium (1.6 M solution in *n*-hexane, 1.06 mL, 1.70 mmol, 2.00 eq.) was added under moderate stirring. The colorless reaction mixture was stirred for 1 h at  $-78^\circ\text{C}$  and then 30 min at ambient temperature. A slightly cloudy, colorless suspension was obtained over the course of the lithiation. Compound **1OTMS** (250 mg, 850  $\mu$ mol, 1.00 eq.) was dissolved in diethyl ether (4 mL) in a 50 mL Schlenk flask and cooled to  $-78^\circ\text{C}$  (*i*PrOH/dry ice). Then, the freshly prepared 4-(methoxy)phenyl lithium solution was added dropwise to compound **1OTMS**. Upon addition, a color change from colorless to deep yellow and the formation of a solid was observed. The reaction was stirred for 5 min at  $-78^\circ\text{C}$ . After 5 min, the cooling bath was removed. Upon warm up to ambient temperature, the solid completely dissolved again and the precipitation of an orange oil was observed. After 32 h, the orange oil was separated from the solution via cannulation. In a glovebox, the oil was redissolved in tetrahydrofuran (3 mL). After pipet filtration, the solution was layered with toluene (2 mL) and the layered solution was stored at  $-30^\circ\text{C}$  until crystallization of **5OMe[Li]**. This procedure was repeated two times to obtain **5OMe[Li](thf)<sub>4</sub>** in sufficient purity. The supernatant was removed, and the crystals were briefly dried *in vacuo*. **Yield of 5OMe[Li](thf)<sub>4</sub>**: 226 mg (316  $\mu$ mol, 37%) pale yellow, crystalline solid.

**<sup>1</sup>H NMR** (600 MHz, 298 K,  $\text{C}_6\text{D}_6$ ):  $\delta$  = 7.85-7.89 (m, 4H, *H*-13), 7.58 (d,  $^3J_{\text{HH}}$  = 7.30 Hz, 1H, *H*-3), 7.34-7.37 (m, 2H, *H*-9), 7.30 (td,  $^3J_{\text{HH}}$  = 7.25 Hz,  $^4J_{\text{HH}}$  = 1.28 Hz, 1H, *H*-4), 7.14-7.17 (m, 5H, *H*-5)\*<sup>1</sup>, 7.09-7.12 (m, 2H, *H*-1 + *H*-6), 6.96-6.99 (m, 2H, *H*-10), 6.86-6.89 (m, 4H, *H*-14), 6.62 (tt,  $^3J_{\text{HH}}$  = 7.21 Hz,  $^4J_{\text{HH}}$  = 1.07 Hz, 1H, *H*-11), 3.38 (s, 6H,  $\text{OCH}_3$ ), 3.33-3.36 (m, 20H, 5  $\times$   $\text{CH}_2$ -thf), 1.30-1.34 (m, 20H, 5  $\times$   $\text{CH}_2$ -thf) ppm. **<sup>7</sup>Li NMR** (233 MHz, 298 K,  $\text{C}_6\text{D}_6$ )  $\delta$  =  $-0.18$  (s) ppm. **<sup>11</sup>B NMR** (193 MHz, 298 K,  $\text{C}_6\text{D}_6$ )  $\delta$  =  $-3.2$  (br s) ppm. **<sup>13</sup>C{<sup>1</sup>H<sup>11</sup>B} NMR** (151 MHz, 298 K,  $\text{C}_6\text{D}_6$ )  $\delta$  = 156.8 ( $\text{C}_q$ -15), 155.0 ( $\text{C}_q^{\text{B}}$ -7), 153.5 ( $\text{C}_q^{\text{N}}$ -8), 150.3 ( $\text{C}_q^{\text{B}}$ -12), 140.8 (C-1), 136.2 (C-14), 134.0 (C-3), 131.4 ( $\text{C}_q$ -2), 129.2 (C-4), 128.5 (C-10), 124.2 (C-5), 123.3 (C-6), 120.3 (C-9), 118.6 (C-11), 113.4 (C-13), 68.0 ( $\text{CH}_2$ -thf), 55.9 ( $-\text{OCH}_3$ ), 25.6 ( $\text{CH}_2$ -thf) ppm. **HRMS** (LIFDI, toluene): expected:  $m/z$  418.1962, 419.1925, 420.1959

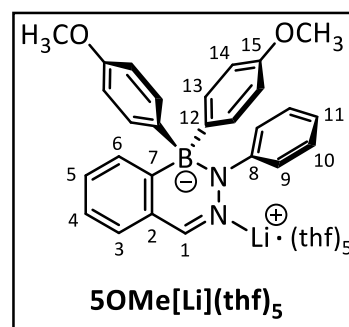

$[\text{C}_{27}\text{H}_{24}\text{BN}_2\text{O}_2]^+$ ; found:  $m/z$  418.1956, 419.1920, 420.2002  $[\text{C}_{27}\text{H}_{24}\text{BN}_2\text{O}_2+\text{H}]^+$ . Crystalline material of **5OMe[Li](thf)<sub>4</sub>** as neon yellow blocks for single-crystal XRD was obtained by storing a saturated tetrahydrofurane solution layered with toluene at  $-30\text{ }^\circ\text{C}$  for several days in a glovebox.

\*<sup>1</sup> Superimposed with  $\text{C}_6\text{D}_6$  solvent signal. Assigned with  $^1\text{H}/^1\text{H}$  COSY NMR and  $^1\text{H}/^{13}\text{C}$  HSQC NMR spectra.

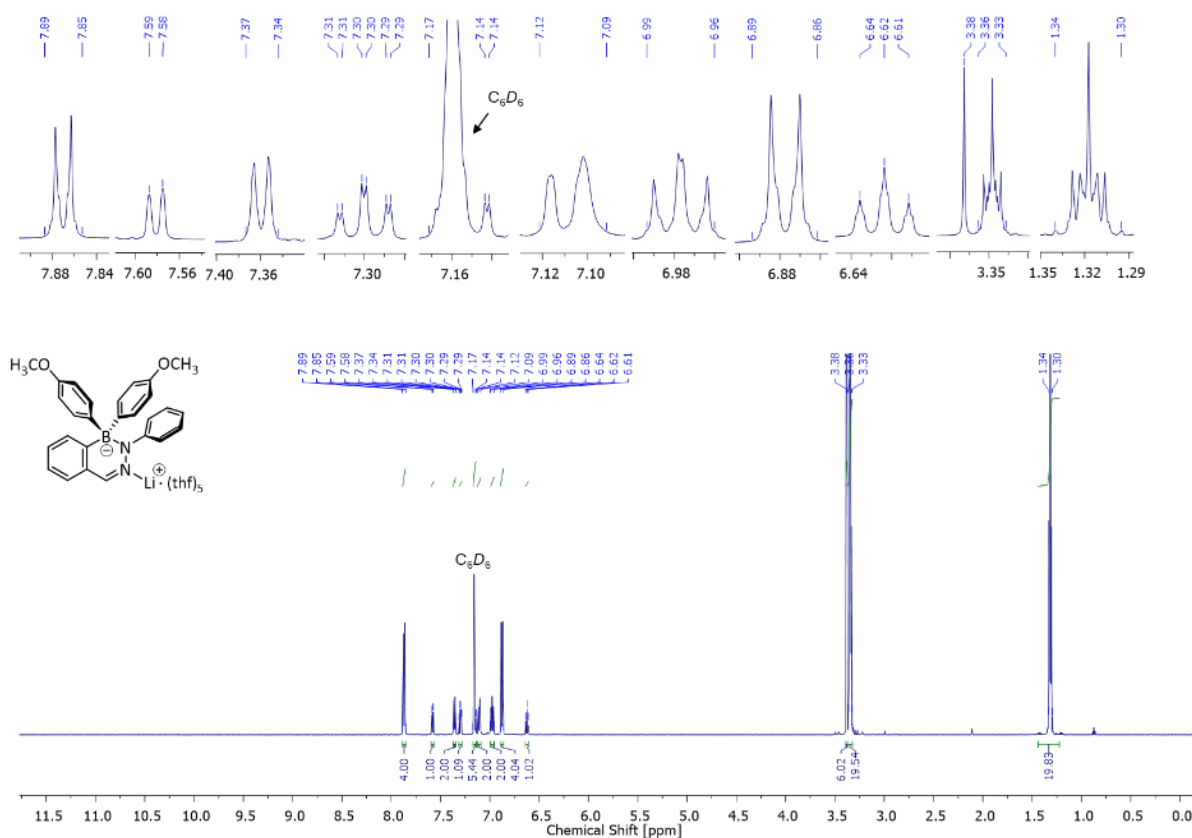

**Fig. S61**  $^1\text{H}$  NMR spectrum of compound **5OMe[Li](thf)<sub>5</sub>** in  $\text{C}_6\text{D}_6$ .

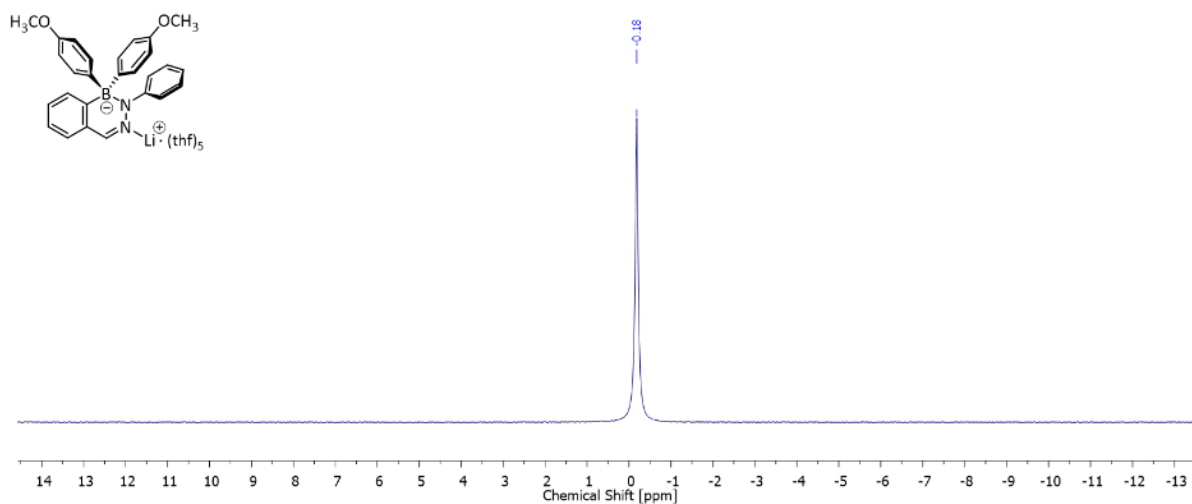

**Fig. S62**  $^7\text{Li}$  NMR spectrum of compound **5OMe[Li](thf)<sub>5</sub>** in  $\text{C}_6\text{D}_6$ .

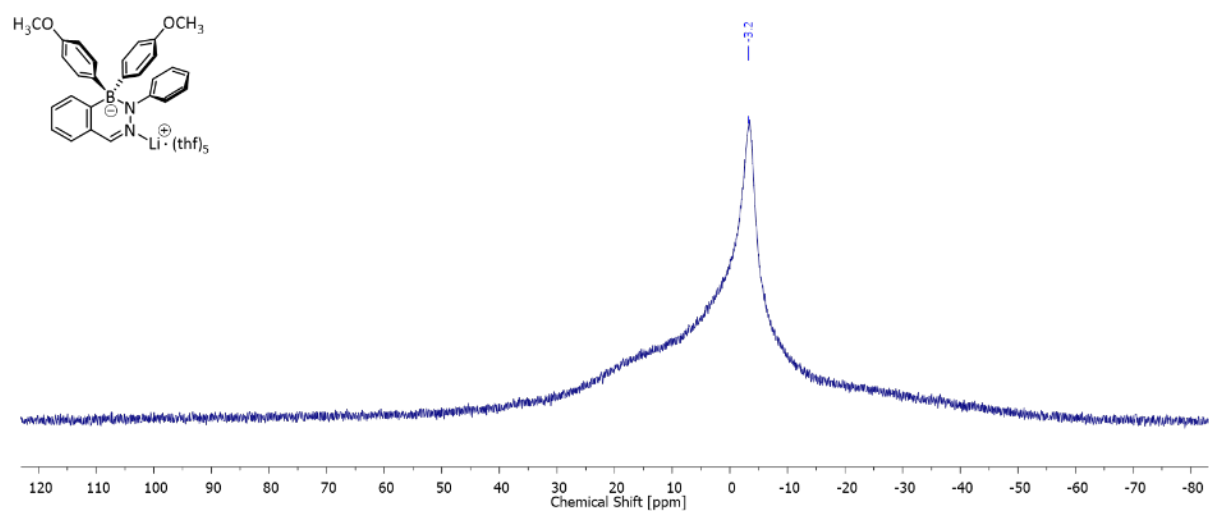

**Fig. S63** Background-reduced  $^{11}\text{B}$  NMR spectrum of compound **5OMe[Li](thf)<sub>5</sub>** in  $\text{C}_6\text{D}_6$ .

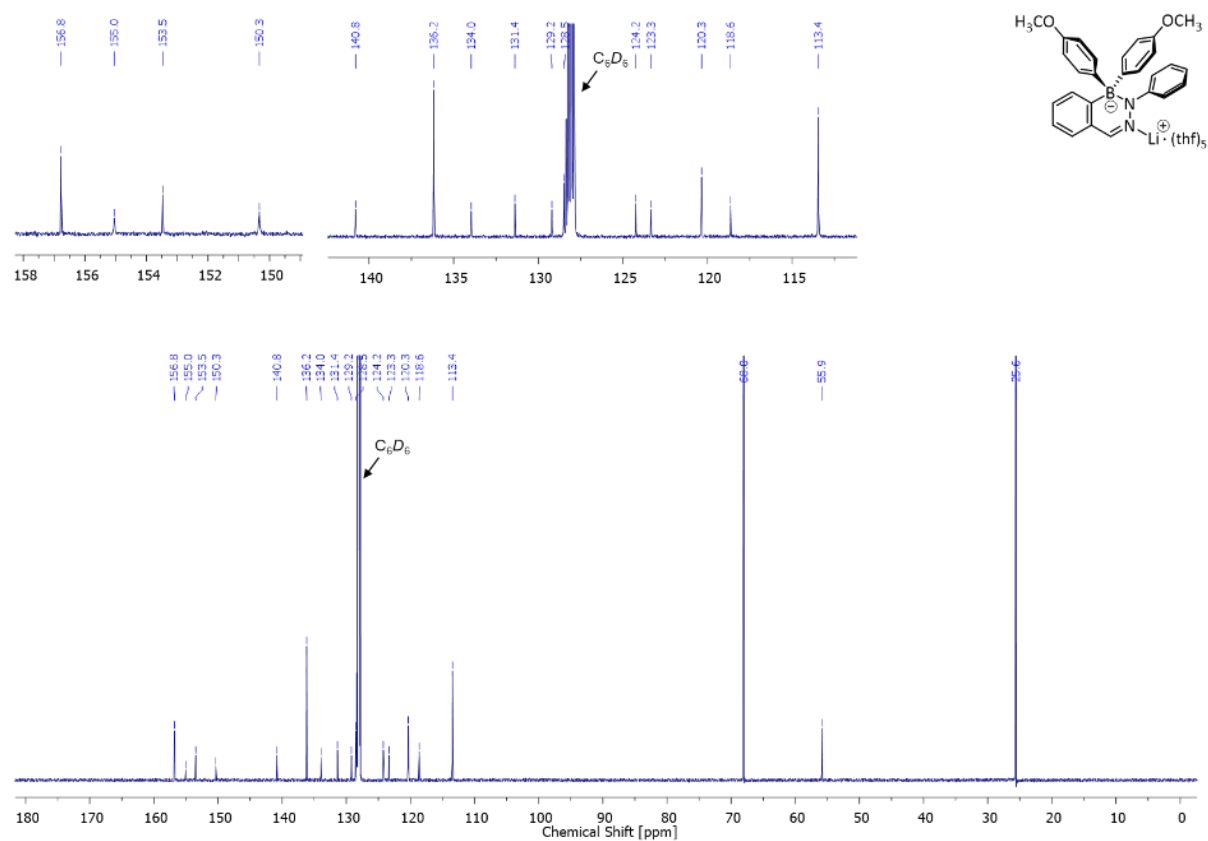

**Fig. S64**  $^{13}\text{C}\{^1\text{H}^{11}\text{B}\}$  NMR spectrum of compound **5OMe[Li](thf)<sub>5</sub>** in  $\text{C}_6\text{D}_6$  (selectively decoupled at  $-3$  ppm).

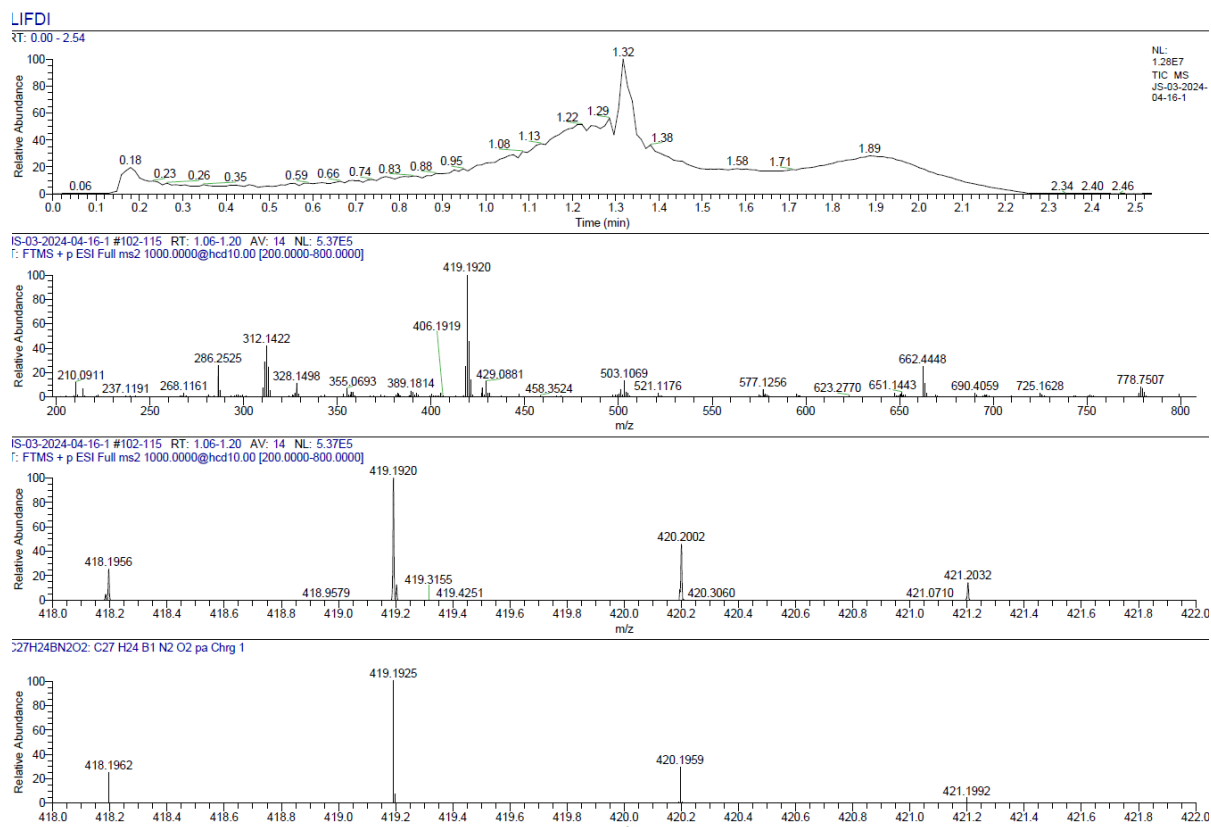

**Fig. S65** LIFDI mass spectrum of compound **5OMe[Li]** (toluene).

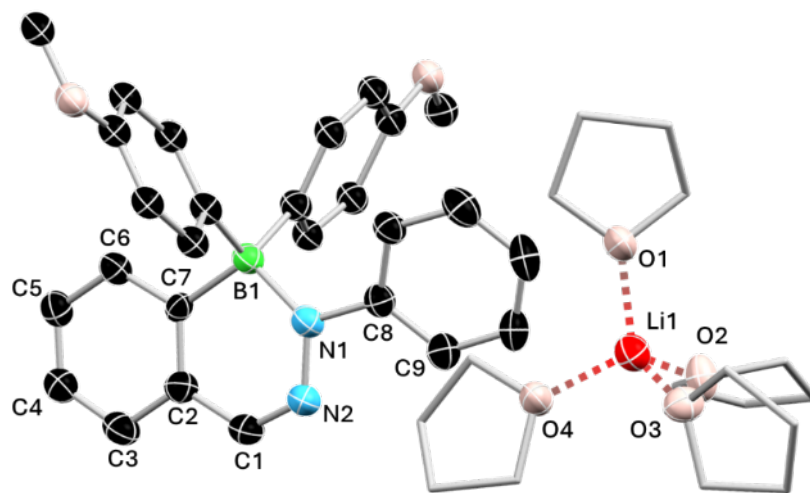

**Fig. S66** Molecular structure of compound **5OMe[Li](thf)<sub>4</sub>**. Ellipsoids drawn at 50% probability (100 K). All H-atoms omitted. Complexing THF and methoxy substituents rendered as wireframe for clarity. Due to the presence of a whole molecule disorder of the borate anion, no discussion of bond lengths is possible.

Crystal data:  $C_{43}H_{56}BLiN_2O_6$ ,  $M_r = 714.64$ , fluorescent yellow block,  $0.730 \times 0.440 \times 0.250 \text{ mm}^3$ , monoclinic space group  $P2_1/n$ ,  $a = 18.5827(2) \text{ \AA}$ ,  $b = 10.59080(10) \text{ \AA}$ ,  $c = 21.2108(2) \text{ \AA}$ ,  $\beta = 110.6840(10)^\circ$ ,  $V = 3905.33(7) \text{ \AA}^3$ ,  $Z = 4$ ,  $\rho_{\text{calcd}} = 1.215 \text{ g}\cdot\text{cm}^{-3}$ ,  $\mu = 0.627 \text{ mm}^{-1}$ ,  $F(000) = 1536$ ,  $T = 100(2) \text{ K}$ ,  $R_1 = 0.0661$ ,  $wR_2 = 0.1685$ , 7834 independent reflections [ $2\theta \leq 150.584^\circ$ ] and 767 parameters.

The diazaborinate unit was disordered by a whole molecule disorder, which is freely refined with a ratio of 0.61423. The atomic displacement parameters of atoms B1\_1 to C7\_11 were restraint with RIGU (ESD = 0.03) keyword in ShelXL input ('enhanced rigid bond' restraint for all bonds in the connectivity list). The displacement parameters of atoms B1\_1 to C7\_11 of the residue 1 were restrained to the same value with similarity restraint SIMU (ESD = 0.03). The Uii displacement parameters of atoms B1\_1

to C7\_11 were restrained with ISOR (ESD = 0.008) keyword to approximate isotropic behavior. The atomic displacement parameters of atoms O1\_3 to C7\_41 were restrained with RIGU (ESD = 0.002) keyword in ShelXL input ('enhanced rigid bond' restraint for all bonds in the connectivity list). The displacement parameters of atoms O1\_3 to C7\_41 of the residues 3 and 4 were restrained to the same value with similarity restraint SIMU (ESD = 0.002). The U<sub>ij</sub> displacement parameters of atoms O1\_3 to C7\_41 were restrained with ISOR (ESD = 0.008) keyword to approximate isotropic behavior. The phenyl substituent residue 2 with the atoms C1 > C6 was corrected with FLAT (ESD = 0.008) keyword.

CCDC number: 2453533

**Lithium 3-phenyl-4-(2,2'-biphenyl)-4,3-borazaroisoquinolinate (5Biph[Li])**

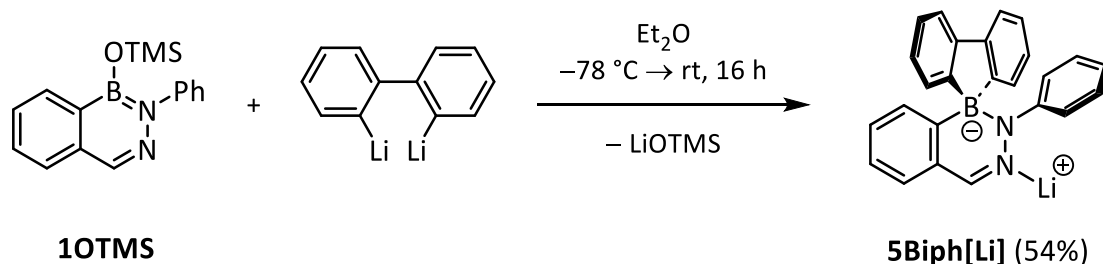

2,2'-Dibromobiphenyl (265 mg, 850  $\mu$ mol, 1.00 eq.) was dissolved in diethyl ether (7 mL) in a 50 mL Schlenk tube and cooled to  $-78\text{ }^{\circ}\text{C}$  (*i*PrOH/dry ice). Slowly, *n*-butyllithium (1.6 M solution in *n*-hexane, 1.06 mL, 1.70 mmol, 2.00 eq.) was added under moderate stirring and the colorless reaction mixture was stirred for 30 min at  $-78\text{ }^{\circ}\text{C}$ . The cooling bath was removed, and the reaction mixture was then stirred for 60 min at ambient temperature. Compound **1OTMS** (250 mg, 850  $\mu$ mol, 1.00 eq.) was dissolved in diethyl ether (10 mL) in a 100 mL Schlenk flask and cooled to  $-78\text{ }^{\circ}\text{C}$  (*i*PrOH/dry ice). Then, the freshly prepared 2,2'-dilithiobiphenyl solution was added dropwise to compound **1OTMS**. Upon addition, a color change from colorless to yellow and the formation of a neon yellow solid was observed. The reaction was stirred for 5 min at  $-78\text{ }^{\circ}\text{C}$ . After 5 min, the cooling bath was removed, and the suspension was stirred for 16 h at ambient temperature. Half of the solvent was removed under reduced pressure and the suspension was filtrated via filter cannulation at  $0\text{ }^{\circ}\text{C}$ . The remaining solid was washed with cold diethyl ether ( $1 \times 2\text{ mL}$ ), cold toluene ( $1 \times 4\text{ mL}$ ) and briefly dried *in vacuo*. **Yield of 5Biph[Li](OEt<sub>2</sub>)<sub>2</sub>**: 235 mg (459  $\mu$ mol, 54%), neon yellow powder. To obtain the adduct **5Biph[Li](thf)<sub>4</sub>**, some of the solid was re-dissolved in tetrahydrofurane (1 mL) and the solvent was removed under reduced pressure.

**<sup>1</sup>H NMR** (600 MHz, 298 K, C<sub>6</sub>D<sub>6</sub>):  $\delta$  = 8.08 (d, <sup>3</sup>*J*<sub>HH</sub> = 7.49 Hz, 2H, *H*-14), 7.77 (d, <sup>3</sup>*J*<sub>HH</sub> = 6.63 Hz, 2H, *H*-17), 7.39 (dt, <sup>3</sup>*J*<sub>HH</sub> = 7.32 Hz, <sup>4</sup>*J*<sub>HH</sub> = 1.09 Hz, 2H, *H*-15), 7.19-7.24 (m, 4H, *H*-16 + *H*-1 + *H*-6), 7.06-7.11 (m, 2H, *H*-3 + *H*-5), 6.99 (d, <sup>3</sup>*J*<sub>HH</sub> = 7.82 Hz, 2H, *H*-9), 6.94 (dt, <sup>3</sup>*J*<sub>HH</sub> = 7.32 Hz, <sup>4</sup>*J*<sub>HH</sub> = 0.93 Hz, 1H, *H*-4), 6.80-6.84 (m, 2H, *H*-10), 6.48-6.52 (m, 1H, *H*-11), 3.26-3.30 (m, 16H, 4  $\times$  CH<sub>2</sub>-thf), 1.24-1.28 (m, 16H, 4  $\times$  CH<sub>2</sub>-thf) ppm.

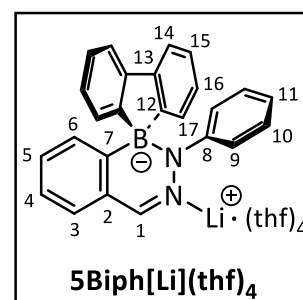

**<sup>7</sup>Li NMR** (233 MHz, 298 K, C<sub>6</sub>D<sub>6</sub>)  $\delta$  =  $-0.24$  (s) ppm. **<sup>11</sup>B NMR** (193 MHz, 298 K, C<sub>6</sub>D<sub>6</sub>)  $\delta$  =  $-3.6$  (br s) ppm. **<sup>13</sup>C{<sup>1</sup>H<sup>1</sup>B} NMR** (151 MHz, 298 K, C<sub>6</sub>D<sub>6</sub>)  $\delta$  = 165.2 (C<sub>q</sub><sup>B</sup>-12), 153.3 (C<sub>q</sub><sup>N</sup>-8), 152.5 (C<sub>q</sub><sup>B</sup>-7), 148.1 (C<sub>q</sub>-13), 139.6 (C-1), 132.9 (C-3), 131.8 (C-17), 131.2 (C<sub>q</sub>-2), 129.6 (C-4), 129.0 (C-10), 126.2 (C-16), 125.7 (C-15), 124.6 (C-5), 124.3 (C-6), 119.6 (C-14), 119.1 (C-11), 118.4 (C-9), 68.1 (CH<sub>2</sub>-thf), 25.5 (CH<sub>2</sub>-thf) ppm. **HRMS** (LIFDI, toluene): expected: *m/z* 357.1672, 358.1636, 359.1669 [C<sub>25</sub>H<sub>18</sub>BN<sub>2</sub>+H]<sup>+</sup>; found: *m/z* 357.1553, 358.1630, 359.1663 [C<sub>25</sub>H<sub>18</sub>BN<sub>2</sub>+H]<sup>+</sup>. Crystalline material of **5Biph[Li](OEt<sub>2</sub>)<sub>2</sub>** as neon yellow

blocks for single-crystal XRD was obtained by storing the combined wash solutions at  $-30\text{ }^{\circ}\text{C}$  for several days in a glovebox.

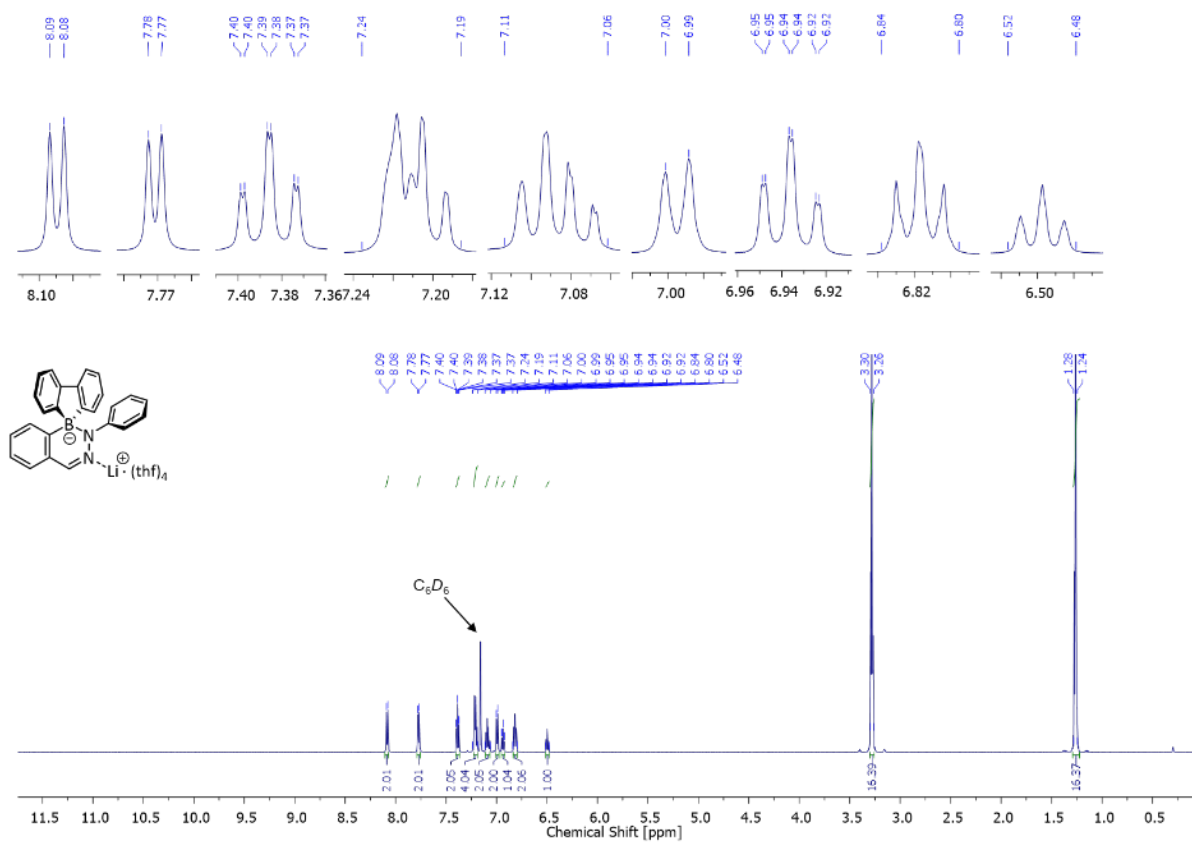

**Fig. S67** <sup>1</sup>H NMR spectrum of compound **5Biph[Li](thf)<sub>4</sub>** in C<sub>6</sub>D<sub>6</sub>.

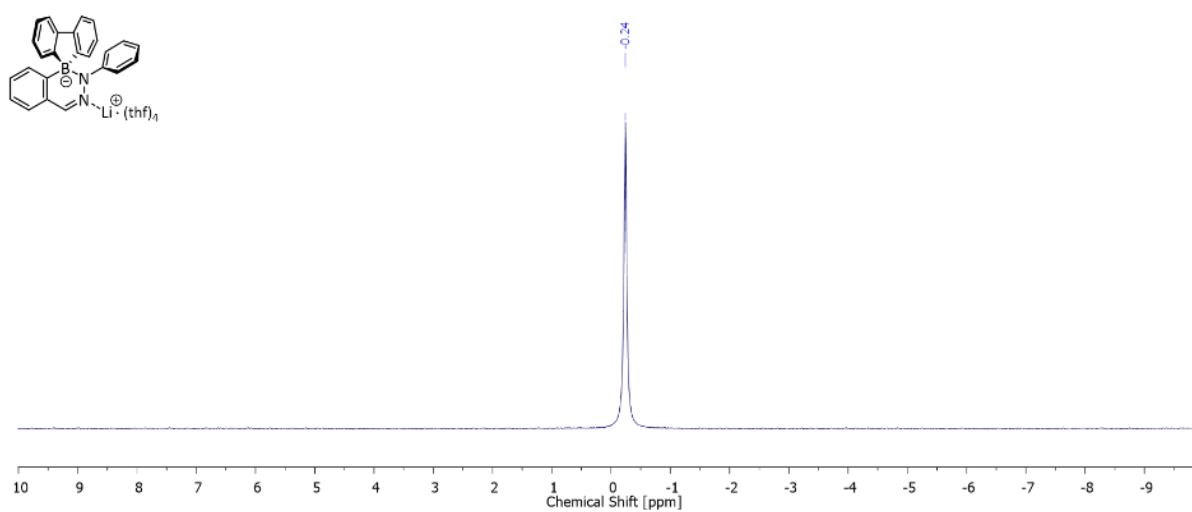

**Fig. S68** <sup>7</sup>Li NMR spectrum of compound **5Biph[Li](thf)<sub>4</sub>** in C<sub>6</sub>D<sub>6</sub>.



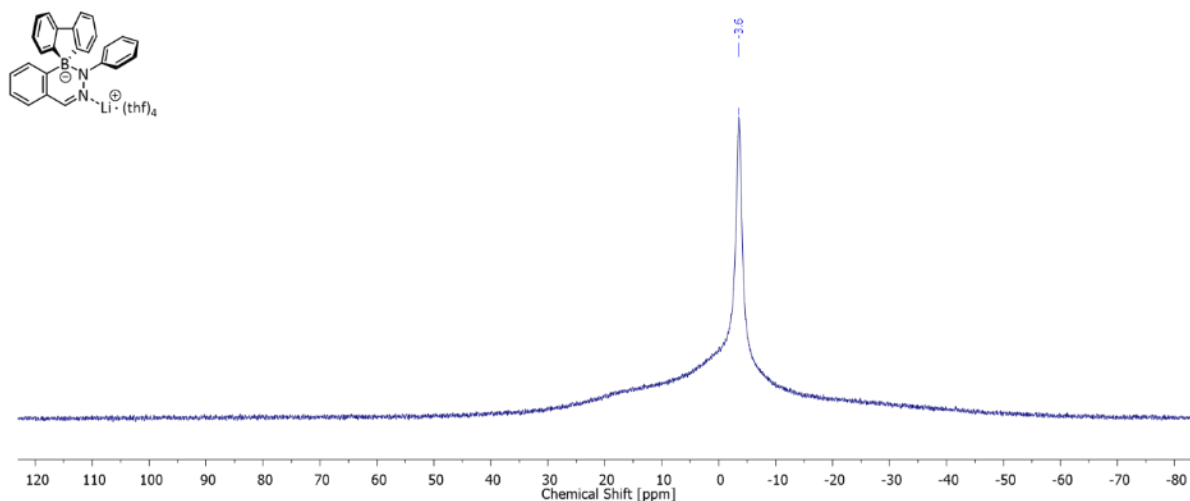

**Fig. S69** Background-reduced <sup>11</sup>B NMR spectrum of compound **5Biph[Li](thf)<sub>4</sub>** in C<sub>6</sub>D<sub>6</sub>.

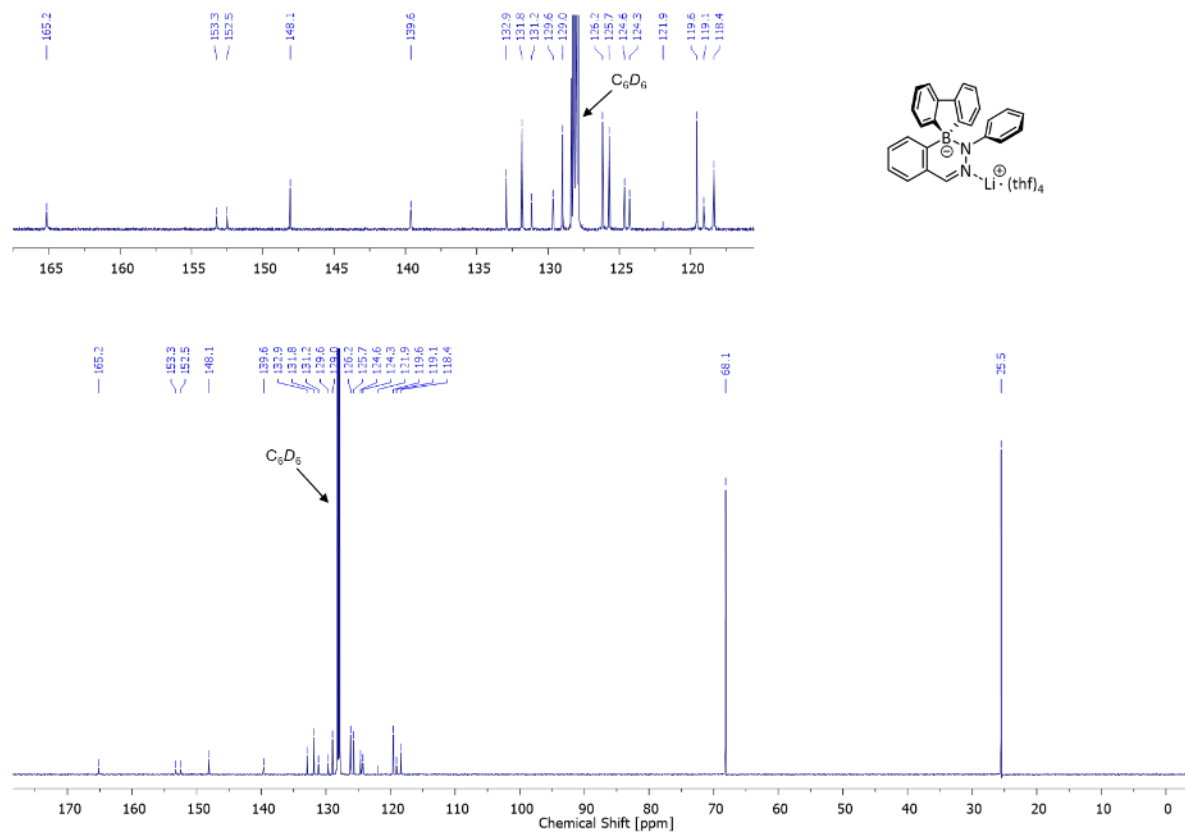

**Fig. S70** <sup>13</sup>C{<sup>1</sup>H<sup>11</sup>B} NMR spectrum of compound **5Biph[Li](thf)<sub>4</sub>** in C<sub>6</sub>D<sub>6</sub> (selectively decoupled at -3 ppm).

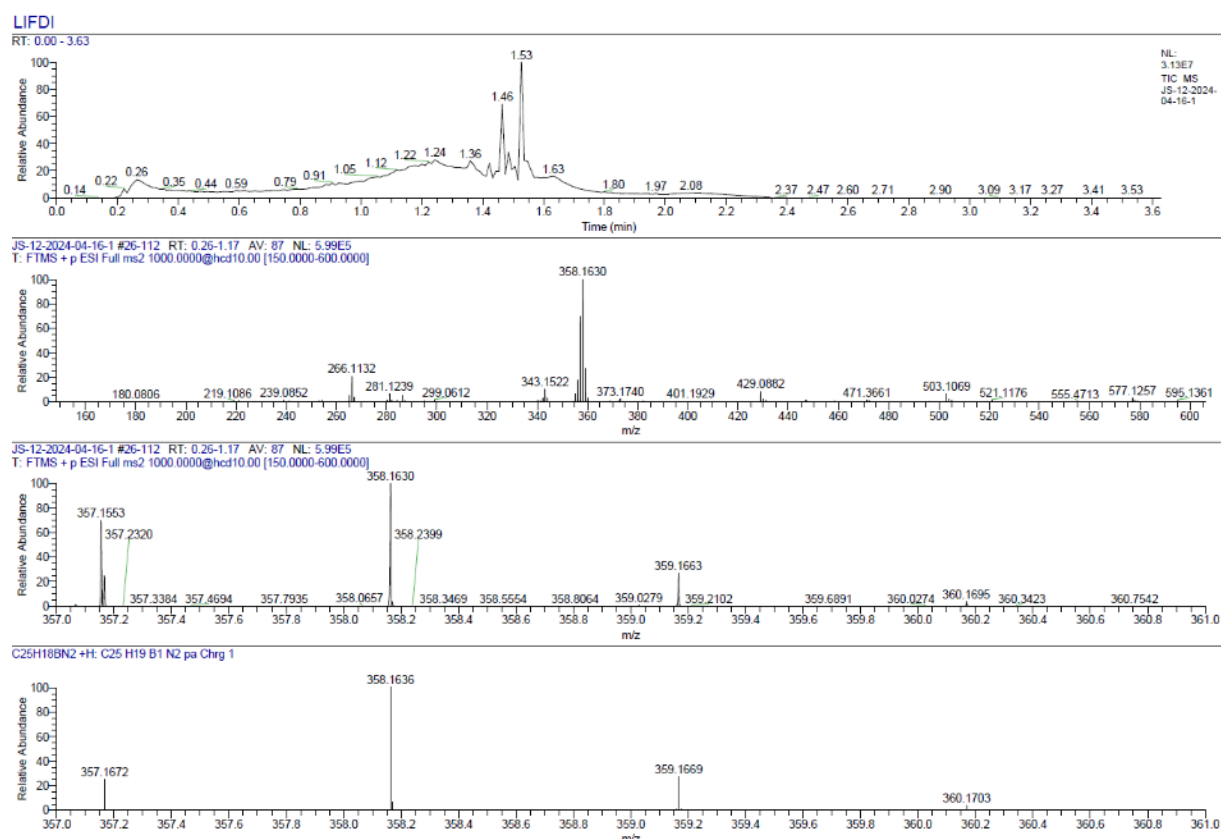

**Fig. S71** LIFDI mass spectrum of compound **5Biph[Li]** (toluene).

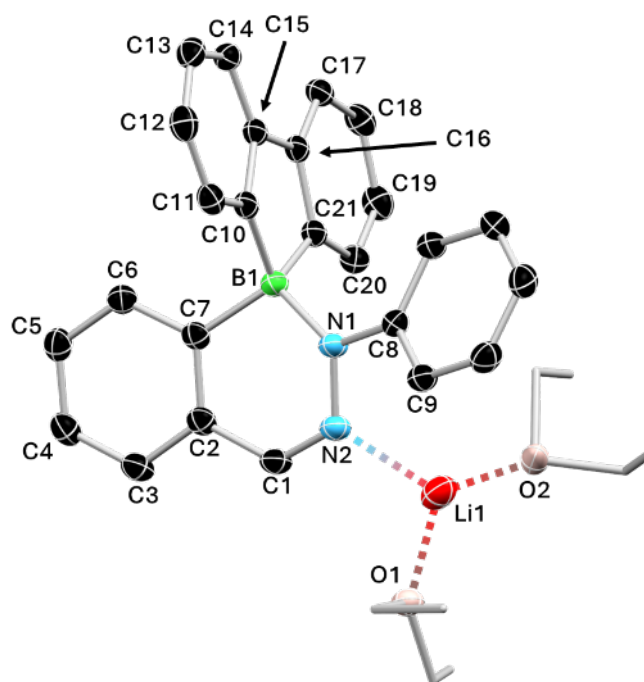

**Fig. S72**

Molecular structure of compound **5Biph[Li](OEt<sub>2</sub>)<sub>2</sub>**. Ellipsoids drawn at 50% probability (100 K). All H-atoms omitted. Complexing ether rendered as wireframe for clarity. Selected bond lengths (Å) and angles (°) of **5Biph[Li](OEt<sub>2</sub>)<sub>2</sub>**: N2–Li1 1.996(2), B1–N1 1.5708(13), N1–N2 1.3753(11), N2–C1 1.2963(13), C1–C2 1.4498(14), C2–C3 1.4046(14), C3–C4 1.3839(15), C4–C5 1.3924(16), C5–C6 1.3917(15), C6–C7 1.3996(14), C2–C7 1.4041(14), C7–B1 1.6241(14), N1–C8 1.4023(13), B1–C10 1.6313(14), C10–C11 1.3921(14), C11–C12 1.3948(15), C12–C13 1.3903(16), C13–C14 1.3929(15), C14–C15 1.3927(14), C15–C10 1.4146(14), C15–C16 1.4770(13), C16–C17 1.3923(14), C17–C18 1.3894(15), C18–C19 1.3900(16), C19–C20 1.3962(15), C20–C21 1.3927(14), C16–C21 1.4107(13), C21–B1 1.6399(14), B1–N1–N2–C1 15.80(14), B1–C7–C2–C1 6.16(14), N2–N1–C8–C9 32.11(13), C10–C15–C16–C21 1.57(11).

Crystal data: C<sub>33</sub>H<sub>38</sub>BLiN<sub>2</sub>O<sub>2</sub>, *M<sub>r</sub>* = 512.40, yellow block, 0.390×0.150×0.090 mm<sup>3</sup>, monoclinic space group *P*2<sub>1</sub>/*c*, *a* = 14.82620(10) Å, *b* = 10.01210(10) Å, *c* = 19.99020(10) Å, β = 99.70°, *V* = 2924.94(4) Å<sup>3</sup>, *Z* = 4, ρ<sub>calcd</sub> = 1.164 g·cm<sup>-3</sup>, μ = 0.546 mm<sup>-1</sup>, *F*(000) = 1096, *T* = 100(2) K, *R*<sub>1</sub> = 0.0383, *wR*<sub>2</sub> = 0.0966, 5864 independent reflections [*2*θ ≤ 150.202°] and 444 parameters.

Both Et<sub>2</sub>O molecules are disordered. The atomic displacement parameters of all Et<sub>2</sub>O atoms O1\_4 to C4\_61 were restrained with RIGU keyword in ShelXL input ('enhanced rigid bond' restraint for all bonds in the connectivity list) with esd = 0.016. The displacement parameters of all Et<sub>2</sub>O atoms O1\_4 to C4\_61 were restrained to the same value with similarity restraint SIMU (esd = 0.032). The *U*<sub>ii</sub> displacement parameters of all Et<sub>2</sub>O atoms O1\_4 to C4\_61 were restrained with ISOR keyword with esd = 0.016 to approximate isotropic behavior.

CCDC number: 2453534

**Lithium 3-phenyl-4-bis(4-(9H-carbazol-9-yl)phenyl)-4,3-borazaroisoquinolinatate (**5Cbz[Li]**)**

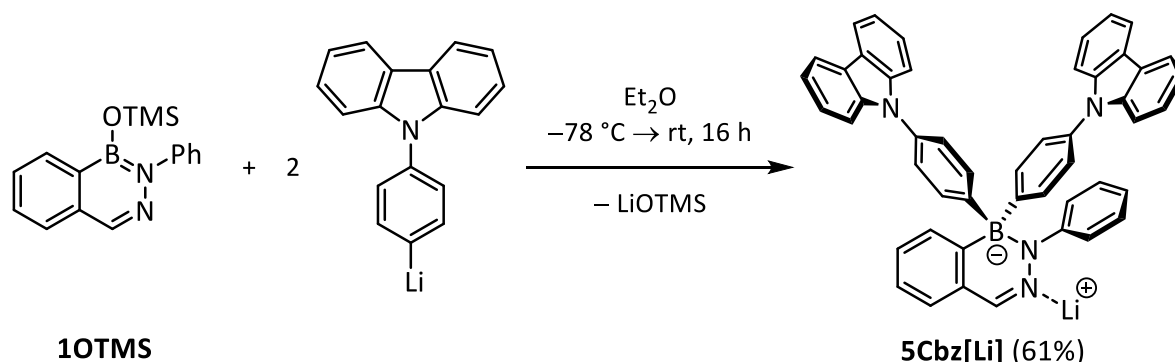

9-(4-Bromophenyl)-9H-carbazol (438 mg, 1.36 mmol, 2.00 eq.) was dissolved in diethyl ether (8 mL) in a 100 mL Schlenk tube and cooled to  $-78^\circ\text{C}$  (*i*PrOH/dry ice). Slowly, *n*-butyllithium (1.6 M solution in *n*-hexane, 0.85 mL, 1.36 mmol, 2.00 eq.) was added under moderate stirring and the colorless reaction mixture was stirred for 45 min at  $-78^\circ\text{C}$ . A gradual color change to light yellow was observed over the course of the lithiation. Compound **1OTMS** (200 mg, 680  $\mu\text{mol}$ , 1.00 eq.) was dissolved in diethyl ether (2 mL) in a 100 mL Schlenk flask and cooled to  $-78^\circ\text{C}$  (*i*PrOH/dry ice). Then, the freshly prepared 4-(9H-carbazol-9-yl)phenyl lithium solution was added dropwise to compound **1OTMS**. Upon addition, a color change from colorless to yellow and the formation of a yellow solid was observed. The reaction was stirred for 5 min at  $-78^\circ\text{C}$ . After 5 min, the cooling bath was removed, and the suspension was stirred for 16 h at ambient temperature. The suspension was filtrated via filter cannulation. The remaining solid was washed with cold diethyl ether (1  $\times$  6 mL), cold toluene (1  $\times$  4 mL) and briefly dried *in vacuo*. **Yield of 5Cbz[Li](OEt)<sub>2</sub>**: 350 mg (414  $\mu\text{mol}$ , 61%) of a pale yellow powder. To obtain the adduct **5Cbz[Li](thf)<sub>3</sub>**, some of the solid was re-dissolved in tetrahydrofurane (1 mL) and the solvent was removed under reduced pressure.

**<sup>1</sup>H NMR** (600 MHz, 298 K, C<sub>6</sub>D<sub>6</sub>):  $\delta$  = 8.08-8.11 (m, 4H, *H*-13), 8.05-8.08 (m, 4H, *H*-20), 7.73 (d, <sup>3</sup>*J*<sub>HH</sub> = 7.31 Hz, 1H, *H*-3), 7.51 (d, <sup>3</sup>*J*<sub>HH</sub> = 8.19 Hz, 4H, *H*-17), 7.40 (pseudo td, <sup>3</sup>*J*<sub>HH</sub> = 7.18 Hz, <sup>4</sup>*J*<sub>HH</sub> = 1.27 Hz, *H*-4), 7.36-7.39 (m, 4H, *H*-14), 7.26-7.32 (m, 6H, *H*-9 + *H*-18), 7.24 (s, 1H, *H*-1), 7.18-7.24 (m, 6H, *H*-5 + *H*-6 + *H*-19), 6.99-7.03 (m, 2H, *H*-10), 6.67 (t, <sup>3</sup>*J*<sub>HH</sub> = 7.31 Hz, 1H, *H*-11), 3.11-3.15 (m, 12H, 3  $\times$  CH<sub>2</sub>-thf), 1.17-1.22 (m, 12H, 3  $\times$  CH<sub>2</sub>-thf) ppm. **<sup>7</sup>Li NMR** (223 MHz, 298 K, C<sub>6</sub>D<sub>6</sub>)  $\delta$  = -0.25 (s) ppm.

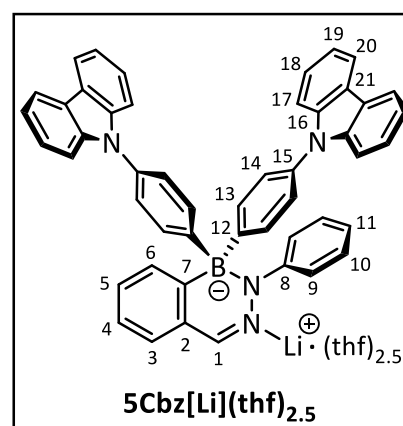

**<sup>11</sup>B NMR** (193 MHz, 298 K, C<sub>6</sub>D<sub>6</sub>)  $\delta$  = -3.1 (br s) ppm. **<sup>13</sup>C{<sup>1</sup>H<sup>11</sup>B} NMR** (151 MHz, 298 K, C<sub>6</sub>D<sub>6</sub>)  $\delta$  = 157.6 (C<sub>q</sub><sup>B</sup>-12), 153.6 (C<sub>q</sub><sup>B</sup>-7), 153.0 (C<sub>q</sub><sup>N</sup>-8), 142.1 (C<sub>q</sub><sup>N</sup>-16), 141.5 (C-1), 136.3 (C-13), 134.1 (C-3), 133.9 (C<sub>q</sub><sup>N</sup>-15), 131.2 (C<sub>q</sub>-2), 130.0 (C-4), 128.5 (C-10), 126.0 (C-18), 125.5 (C-14), 124.9 (C-5), 123.7 (C<sub>q</sub>-21), 123.6 (C-6), 120.5 (C-9), 120.3 (C-20), 119.7 (C-19), 119.1 (C-11), 110.8 (C-17), 68.1

(CH<sub>2</sub>-thf), 25.4 (CH<sub>2</sub>-thf) ppm. **HRMS** (LIFDI, powder): expected: m/z 689.2986, 690.2949, 691.2983, 692.3016 [C<sub>49</sub>H<sub>34</sub>BN<sub>4</sub>+H]<sup>+</sup>; found: m/z 689.2849, 690.2930, 691.2969, 692.3002 [C<sub>49</sub>H<sub>34</sub>BN<sub>4</sub>+H]<sup>+</sup>. Crystalline material of **5Cbz[Li](18-crown-6)** as neon yellow plates for single-crystal XRD was obtained by adding a few milligrams of 18-crown-6 to a saturated solution of **5Cbz[Li](thf)<sub>3</sub>** in benzene and storing the mixture in a closed vial at ambient temperature in a glovebox for several weeks.

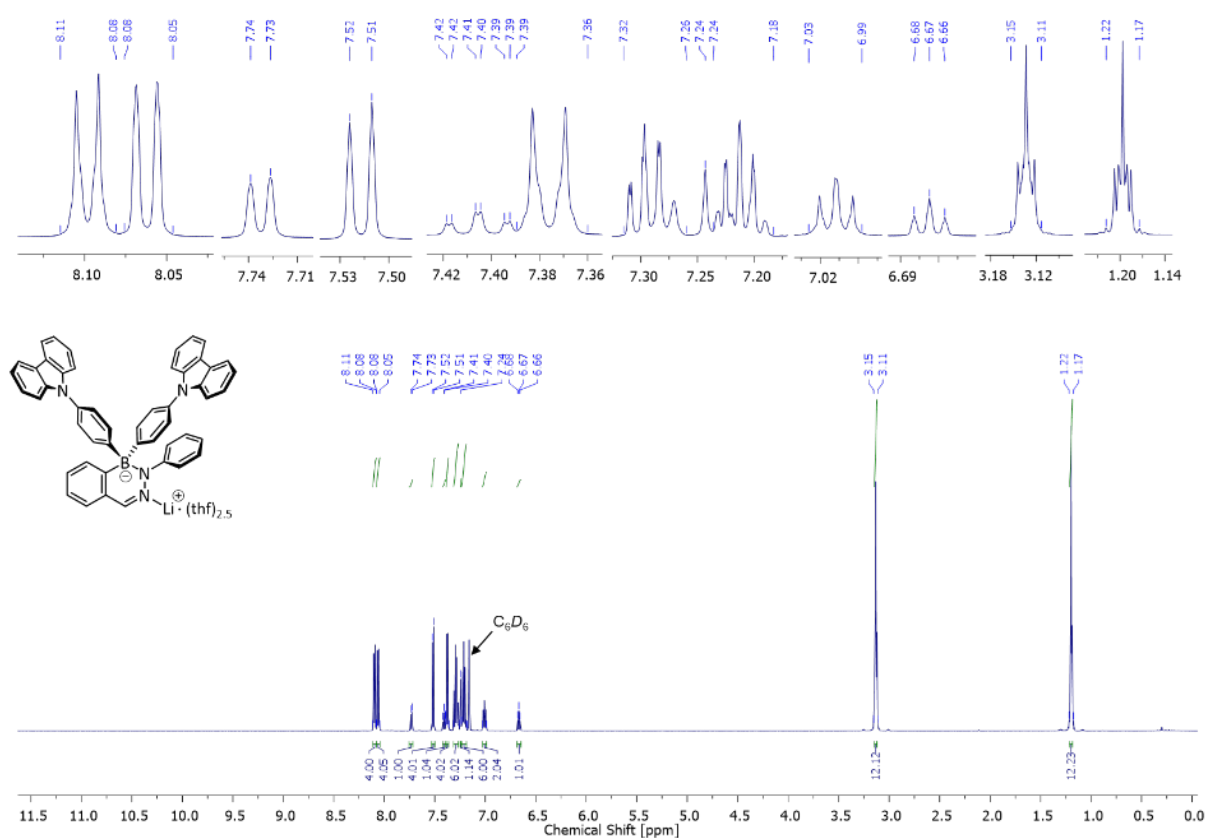

**Fig. S73** <sup>1</sup>H NMR spectrum of compound **5Cbz[Li]Cbx(thf)<sub>2.5</sub>** in C<sub>6</sub>D<sub>6</sub>.

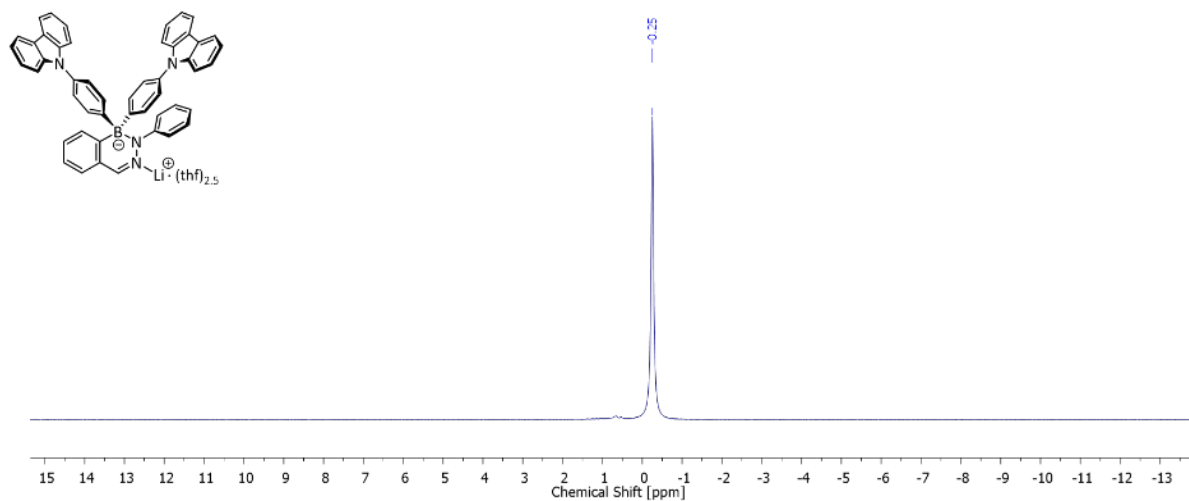

**Fig. S74** <sup>7</sup>Li NMR spectrum of compound **5Cbz[Li]Cbz(thf)<sub>2.5</sub>** in C<sub>6</sub>D<sub>6</sub>.

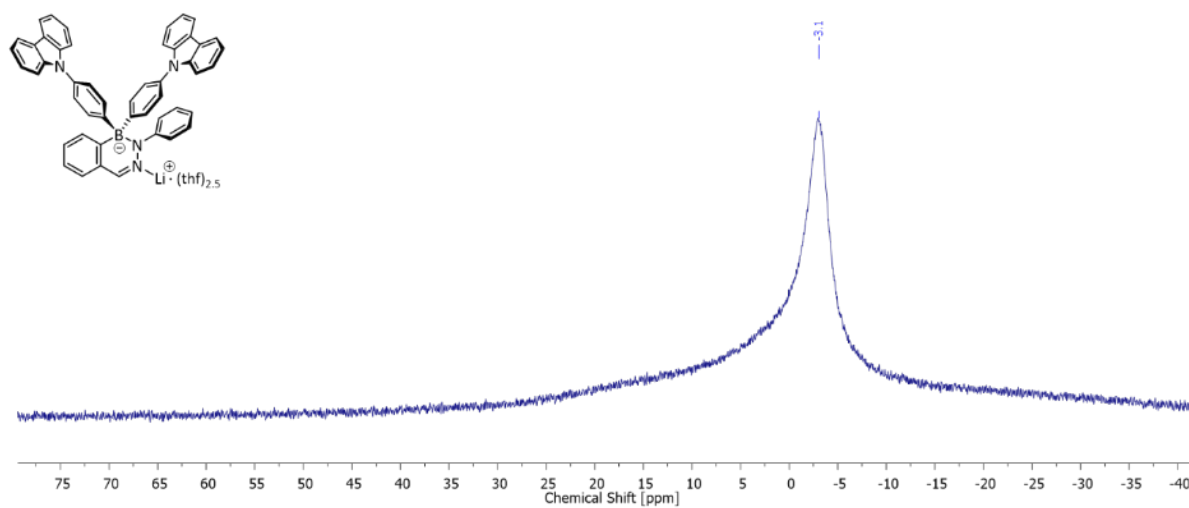

**Fig. S75** Background-reduced <sup>11</sup>B NMR spectrum of compound **5Cbz[Li]Cbz(thf)<sub>2.5</sub>** in C<sub>6</sub>D<sub>6</sub>.

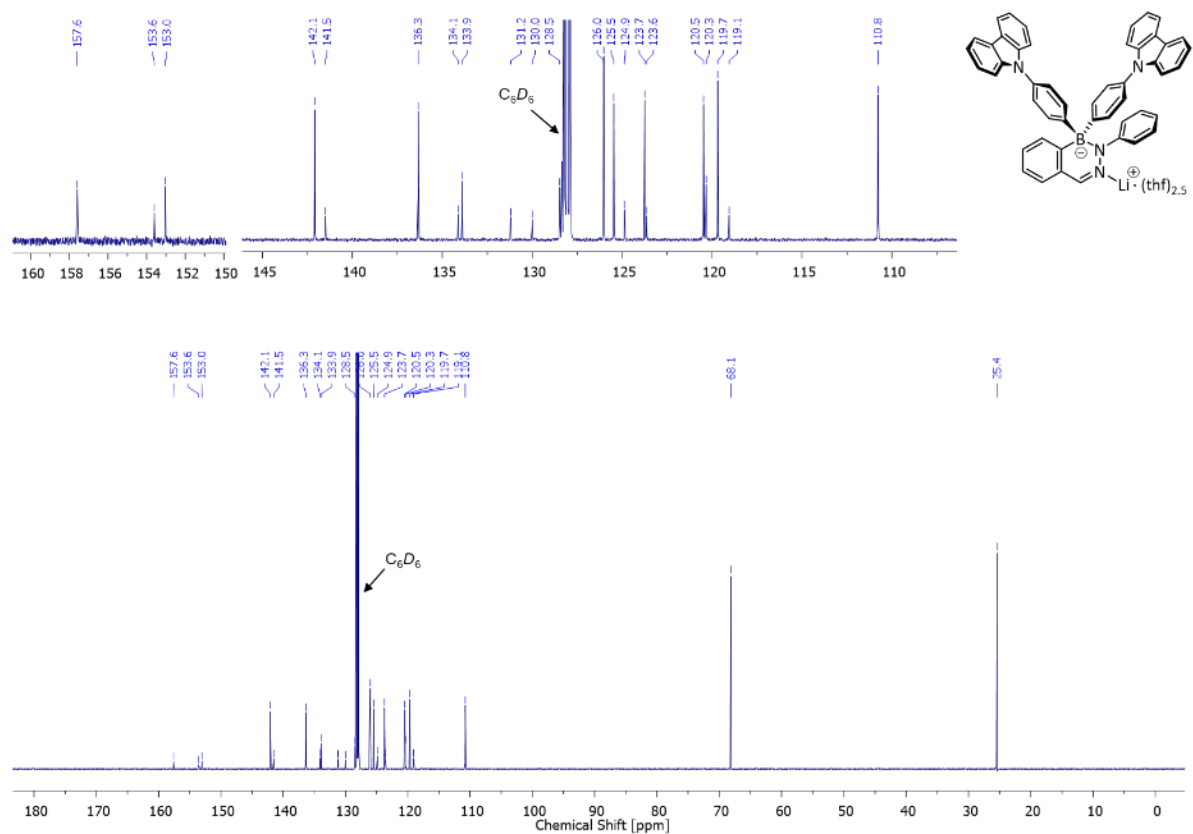

**Fig. S76**  $^{13}\text{C}\{^1\text{H}^{11}\text{B}\}$  NMR spectrum of compound **5Cbz[Li](thf)<sub>2.5</sub>** in  $\text{C}_6\text{D}_6$  ( $^{11}\text{B}$  decoupled at  $-3$  ppm).

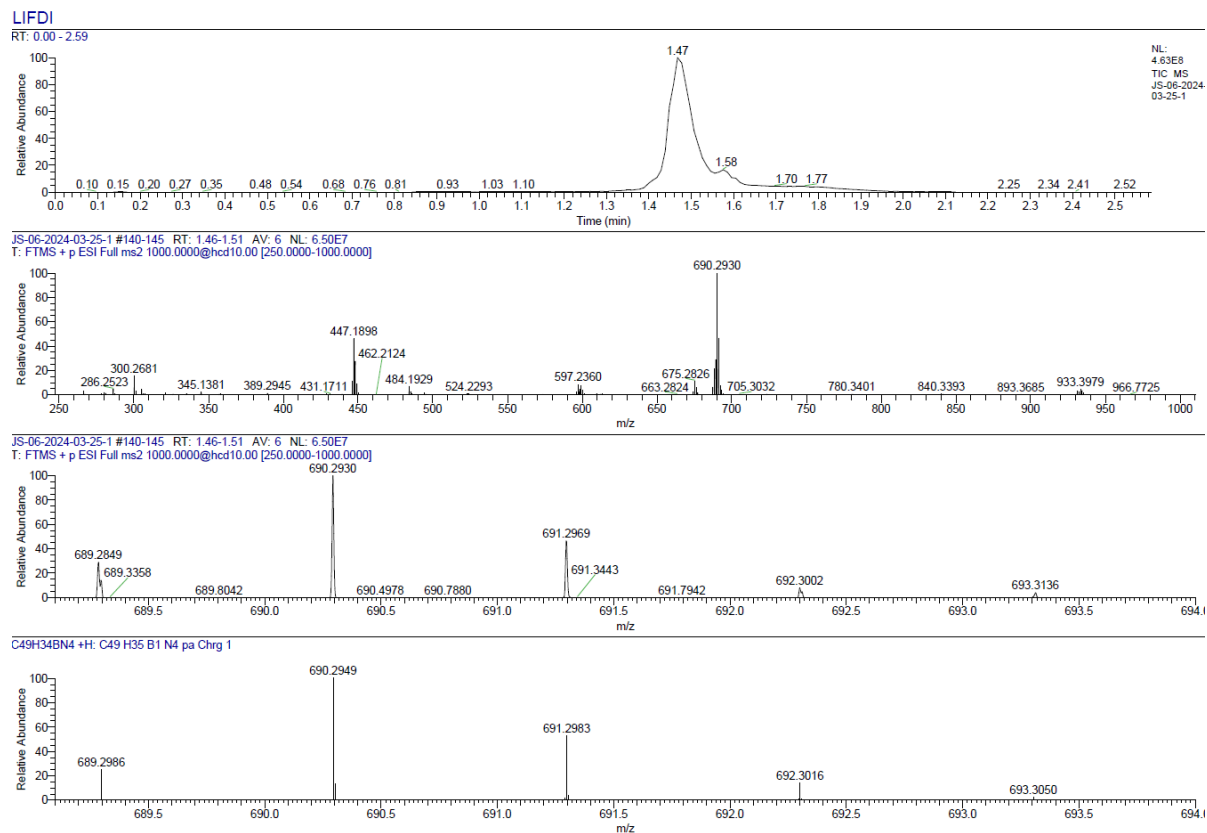

**Fig. S77** LIFDI mass spectrum of compound **5Cbz[Li]** (powder).

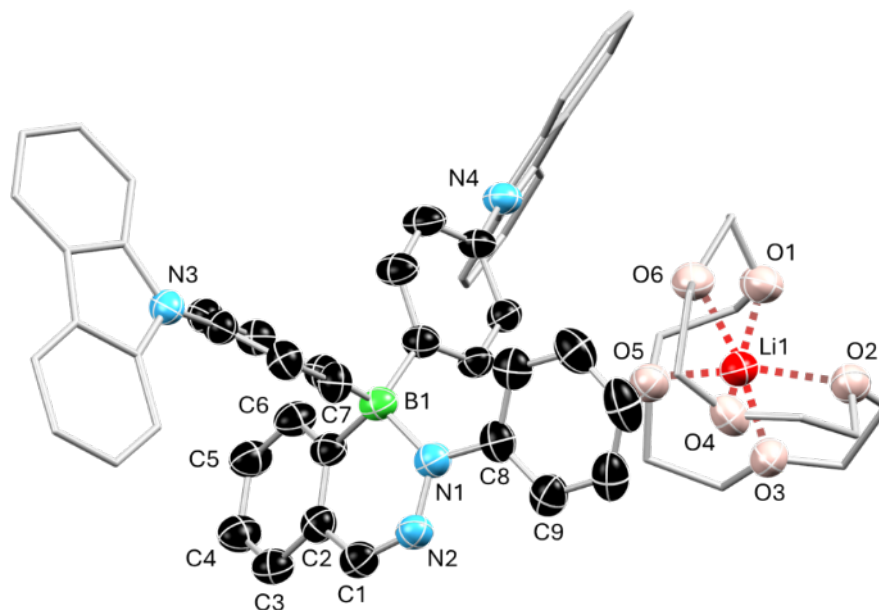

**Fig. S78**

Molecular structure of compound **5Cbz[Li](18-crown-6)**. Ellipsoids drawn at 50% probability (100 K). All H atoms and two co-crystallized, free crown ether molecules omitted for clarity. Complexing crown ether and 9*H*-carbazole substituents rendered as wireframe for clarity. Due to poor crystal quality and heavily disordered crown ethers, the  $wR_2$  value is high. Since no disorders are present in the main diazaborinate molecule, the discussion of bond length is warranted, despite the  $wR_2$  value. Selected bond lengths (Å) and angles (°) of **5Cbz[Li](18-crown-6)**: B1–N1 1.563(6), N1–N2 1.373(5), N2–C1 1.299(6), C1–C2 1.442(6), C2–C3 1.413(6), C3–C4 1.369(7), C4–C5 1.404(7), C5–C6 1.379(6), C6–C7 1.377(6), C2–C7 1.399(6), C7–B1 1.640(7), N1–C8 1.407(6), B1–N1–N2–C1 19.7(5), B1–C7–C2–C1 8.0(6), N2–N1–C8–C9 23.2(5).

Crystal data:  $C_{73}H_{82}BLiN_4O_{12}$ ,  $M_r = 1225.17$ , yellow plate,  $0.100 \times 0.080 \times 0.030$  mm<sup>3</sup>, monoclinic space group  $P2_1/c$ ,  $a = 19.8918(3)$  Å,  $b = 14.6116(2)$  Å,  $c = 23.1516(4)$  Å,  $\beta = 102.0619(18)^\circ$ ,  $V = 6580.5(2)$  Å<sup>3</sup>,  $Z = 4$ ,  $\rho_{\text{calcd}} = 1.237$  g·cm<sup>−3</sup>,  $\mu = 0.669$  mm<sup>−1</sup>,  $F(000) = 2608$ ,  $T = 100(2)$  K,  $R_1 = 0.1282$ ,  $wR_2 = 0.3151$ , 13205 independent reflections [ $2\theta \leq 150.388^\circ$ ] and 1201 parameters.

Some reflections were removed from refinement as outliers. Crown-ether showed disorder. Equivalent distances in this moiety were restrained using SADI command. The atomic displacement parameters of disordered atoms were restrained with RIGU keyword in ShelXL input ('enhanced rigid bond' restraint for all bonds in the connectivity list), similarity restraint SIMU and additionally  $U_{ii}$  displacement parameters were restrained with ISOR keyword to approximate isotropic behavior.

CCDC number: 2453535



## 2-Methyl-3-phenyl-4-bis(phenyl)-4,3-borazaroisoquinoline (**5Ph[Me]**)

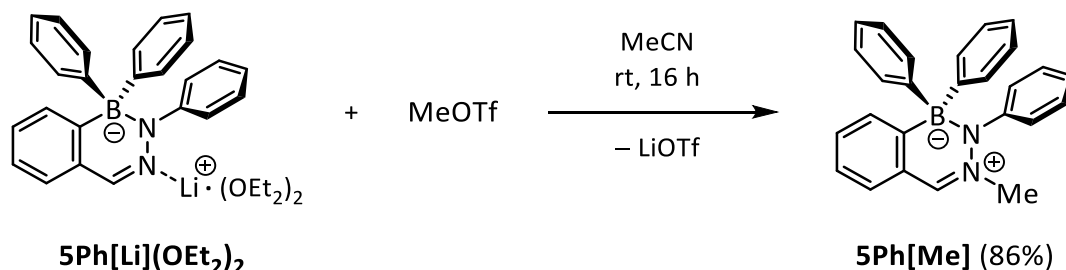

In a glovebox compound **5Ph[Li](OEt<sub>2</sub>)<sub>2</sub>** (100 mg, 194  $\mu\text{mol}$ , 1.00 eq.) was dissolved in acetonitrile (2 mL) in a glass vial equipped with a stirring bar. Methyl triflate (10 drops, xs.) was added in portions at ambient temperature. Upon addition, an immediate color change from pale-yellow to deep orange and the formation of an orange solid was observed. The reaction suspension was stirred for 16 h at ambient temperature in the glovebox. The solid was separated via pipet filtration and the filter cake was washed with cold acetonitrile ( $2 \times 0.5$  mL), *n*-pentane ( $1 \times 1$  mL) and dried *in vacuo*. **Yield of 5Ph[Me]:** 63.0 mg (167  $\mu\text{mol}$ , 86%) of an intense orange powder.

**<sup>1</sup>H NMR** (500 MHz, 298 K, THF-*d*<sub>8</sub>):  $\delta$  = 8.15 (s, 1H, *H*-1), 7.40 (ddd,  $^3J_{\text{HH}}$  = 7.36 Hz; 7.36 Hz,  $^4J_{\text{HH}}$  = 1.28 Hz, 1H, *H*-4), 7.32 (d,  $^3J_{\text{HH}}$  = 7.59 Hz, 1H, *H*-6), 7.18 (ddd,  $^3J_{\text{HH}}$  = 7.45 Hz; 7.45 Hz,  $^4J_{\text{HH}}$  = 1.31 Hz, 1H, *H*-5), 7.09 (d,  $^3J_{\text{HH}}$  = 7.43 Hz, 1H, *H*-3), 6.98-7.02 (m, 4H, *H*-13), 6.90-6.95 (m, 6H, *H*-14 + *H*-10), 6.85-6.89 (m, 2H, *H*-15), 6.82 (tt,  $^3J_{\text{HH}}$  = 7.25 Hz,  $^4J_{\text{HH}}$  = 1.20 Hz, 1H, *H*-11) 6.72-6.76 (m, 2H, *H*-9), 3.77 (d,  $^4J_{\text{HH}}$  = 0.48 Hz, -CH<sub>3</sub>) ppm.

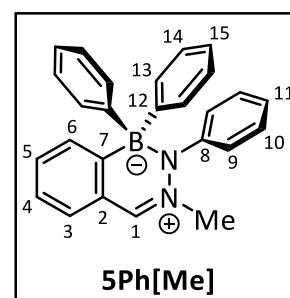

**<sup>11</sup>B{<sup>1</sup>H} NMR** (160 MHz, 298 K, THF-*d*<sub>8</sub>)  $\delta$  = -1.3 (br s) ppm. **<sup>13</sup>C{<sup>1</sup>H} NMR** (126 MHz, 298 K, THF-*d*<sub>8</sub>)  $\delta$  = 156.7 (br, C<sub>q</sub><sup>B</sup>-7), 153.8 (br, C<sub>q</sub><sup>B</sup>-12), 150.4 (C-1), 145.3 (C<sub>q</sub><sup>N</sup>-8), 135.3 (C-13), 134.0 (C-3), 133.9 (C-4), 129.9 (C<sub>q</sub>-2), 128.1 (C-10), 127.5 (C-6), 126.7 (C-14), 126.5 (C-11), 125.4 (C-5), 124.7 (C-15), 124.0 (C-11), 47.8 (-CH<sub>3</sub>) ppm. **HRMS** (LIFDI, THF): expected: *m/z* 373.1985, 374.1949, 375.1982 [C<sub>26</sub>H<sub>23</sub>BN<sub>2</sub>]<sup>+</sup>; found: *m/z* 373.1866, 374.1946, 375.1980 [C<sub>26</sub>H<sub>23</sub>BN<sub>2</sub>]<sup>+</sup>. Crystalline material of **5Ph[Me]** as orange plates for single-crystal XRD was obtained by slow evaporation of a saturated benzene solution at ambient temperature in a glovebox.

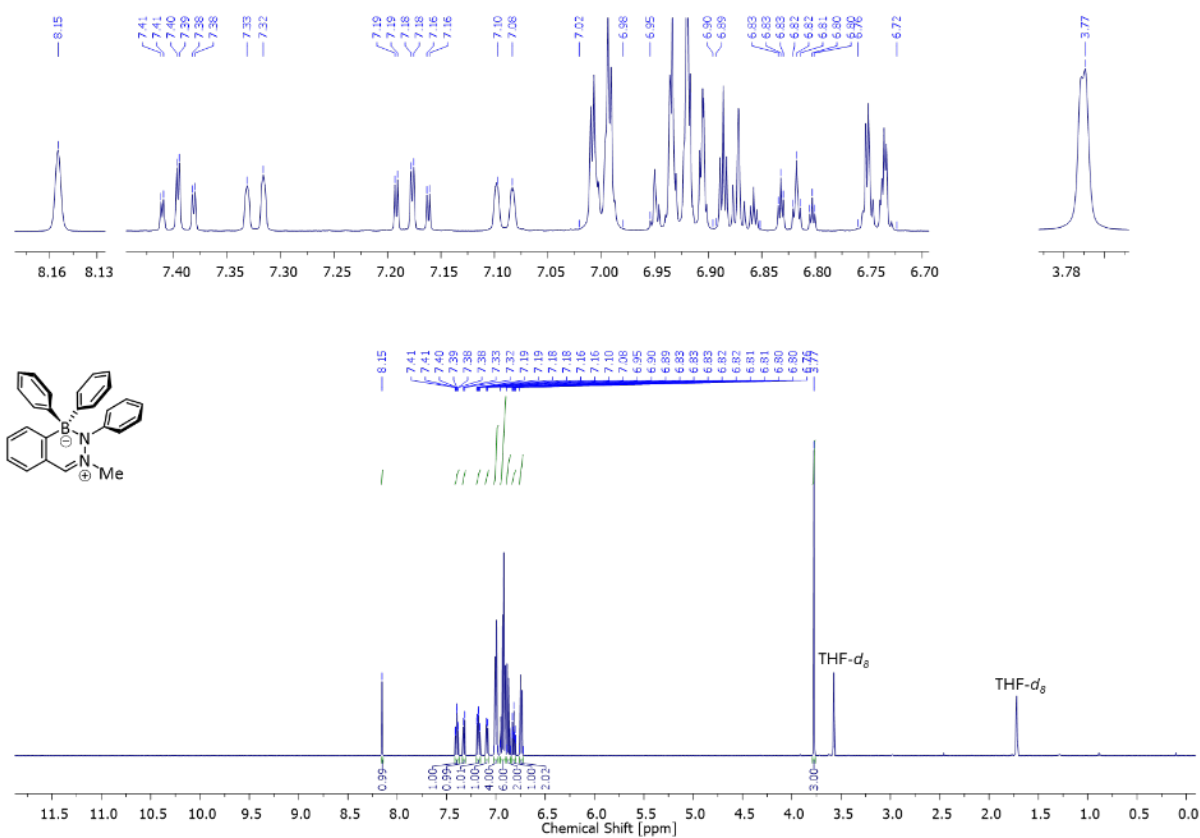

**Fig. S79** <sup>1</sup>H NMR spectrum of compound 5Ph[Me] in THF-*d*<sub>8</sub>.

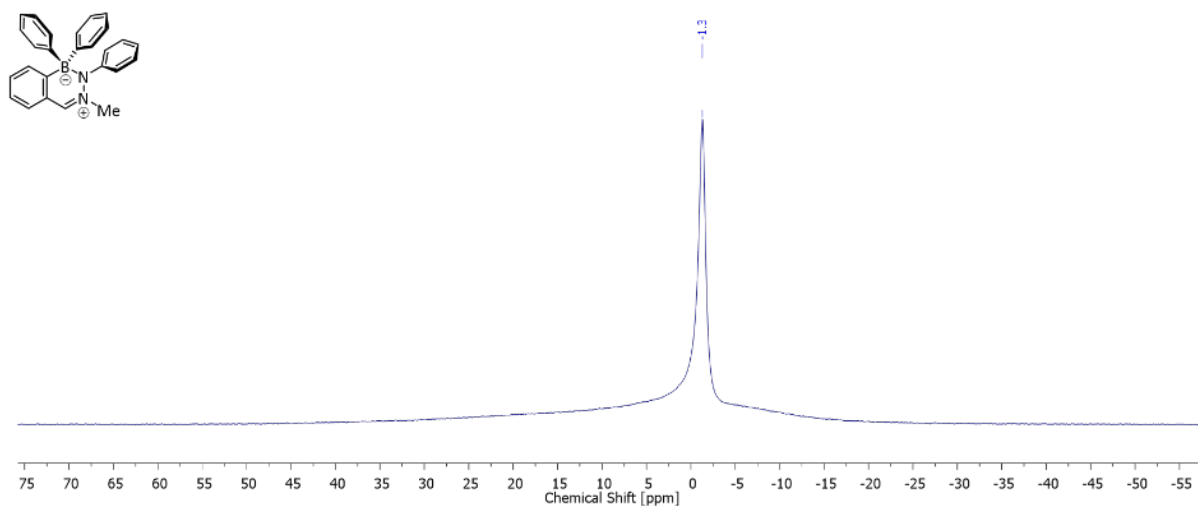

**Fig. S80** Background-reduced <sup>11</sup>B{<sup>1</sup>H} NMR spectrum of compound 5Ph[Me] in THF-*d*<sub>8</sub>.

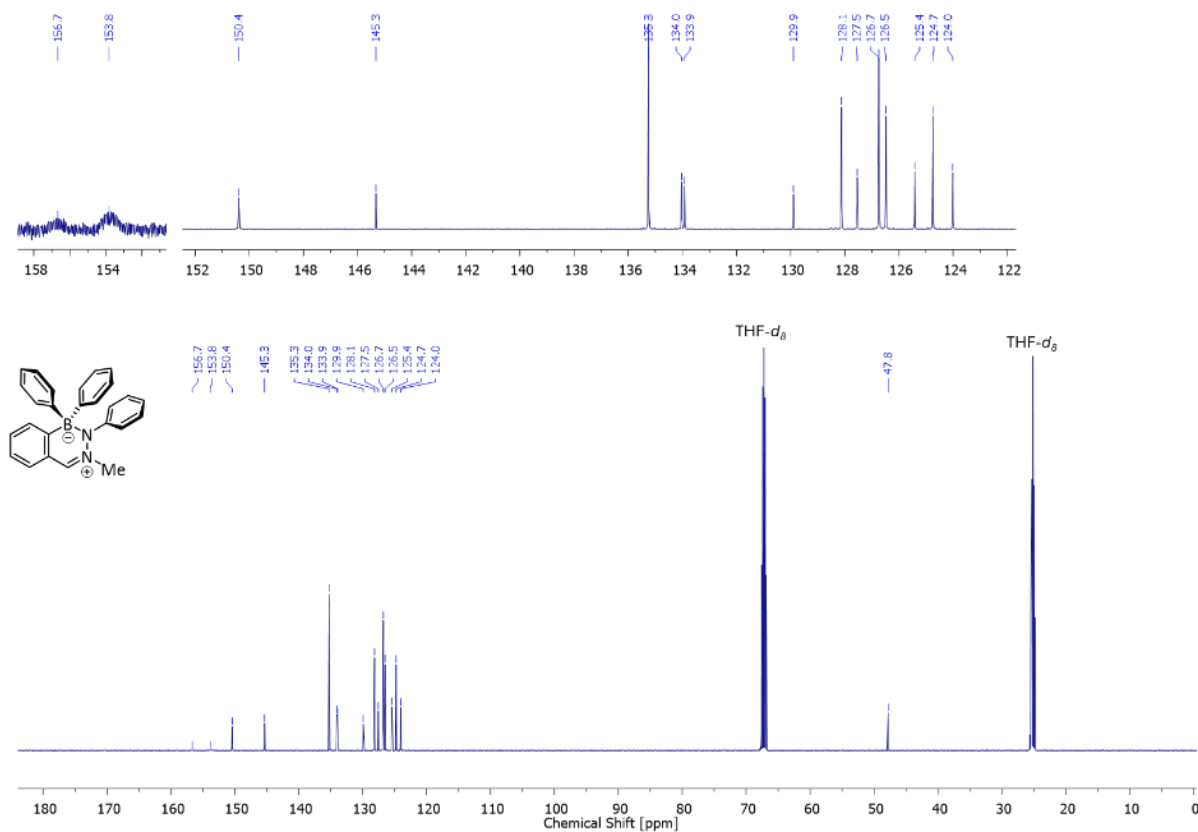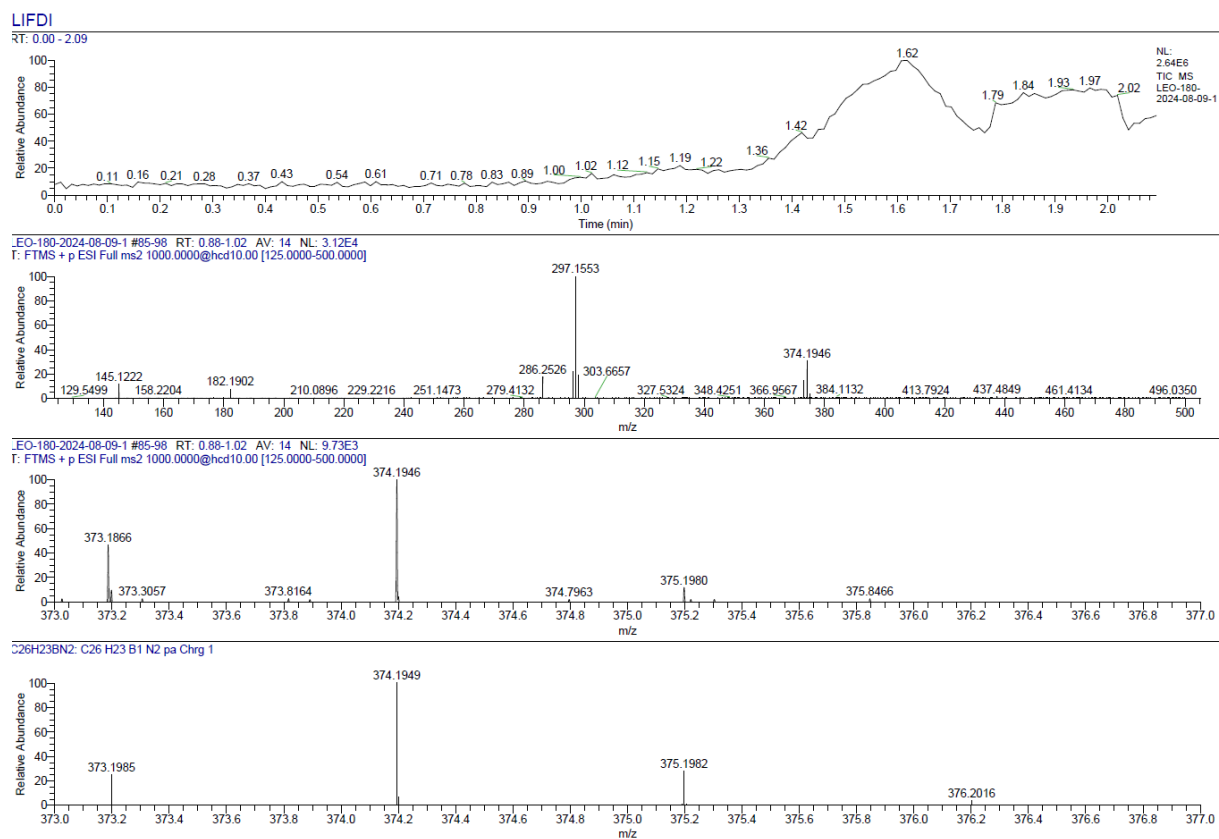

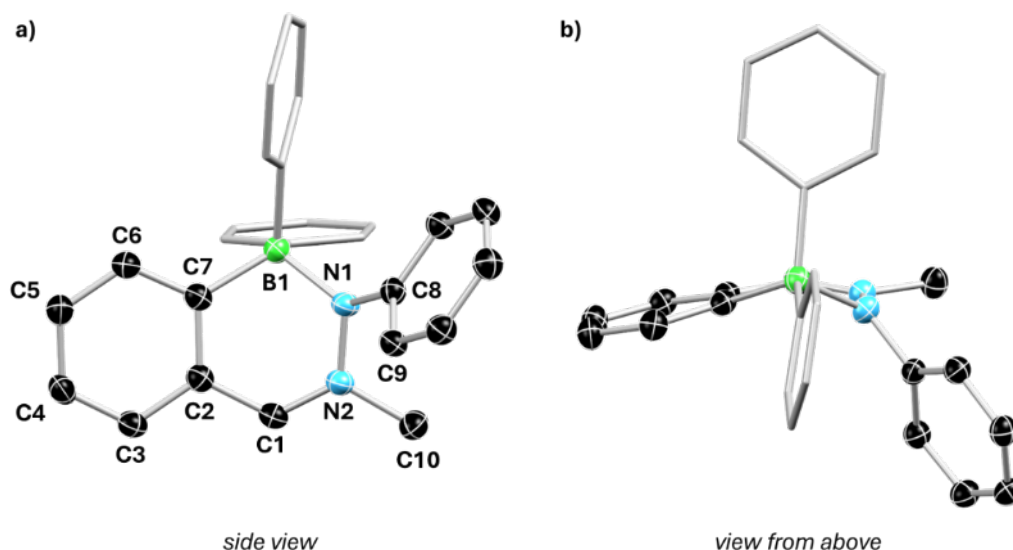

**Fig. S83** Molecular structure of compound **5Ph[Me]**. a) side view; b) view from above. Ellipsoids drawn at 50% (100 K) probability. All H-atoms omitted. Selected bond lengths (Å) and angles (°) of **5Ph[Me]**: B1–N1 1.603(2), N1–N2 1.3844(17), N2–C1 1.4208(19), C1–C2 1.438(2), C2–C3 1.406(2), C3–C4 1.380(2), C4–C5 1.392(2), C5–C6 1.386(2), C6–C7 1.397(2), C2–C7 1.411(2), C7–B1 1.618(2), N1–C8 1.4208(19), N2–C10 1.4777(19), B1–N1–N2–C1 24.96(19), B1–C7–C2–C1 12.3(2), N2–N1–C8–C9 37.51(19).

Crystal data:  $C_{26}H_{23}BN_2$ ,  $M_r = 374.27$ , orange plate,  $0.210 \times 0.150 \times 0.030$  mm<sup>3</sup>, monoclinic space group  $P2_1/n$ ,  $a = 14.1594(4)$  Å,  $b = 9.8690(2)$  Å,  $c = 15.6500(5)$  Å,  $\beta = 111.203(3)^\circ$ ,  $V = 2038.87(10)$  Å<sup>3</sup>,  $Z = 4$ ,  $\rho_{\text{calcd}} = 1.219$  g·cm<sup>-3</sup>,  $\mu = 0.538$  mm<sup>-1</sup>,  $F(000) = 792$ ,  $T = 100(2)$  K,  $R_1 = 0.0580$ ,  $wR_2 = 0.1195$ , 3972 independent reflections [ $2\theta \leq 147.404^\circ$ ] and 263 parameters.

CCDC number: 2453541

**Lithium 3-(2,6-dimethylphenyl)-4-bis(phenyl)-4,3-borazaroisoquinolate (6Ph[Li])**

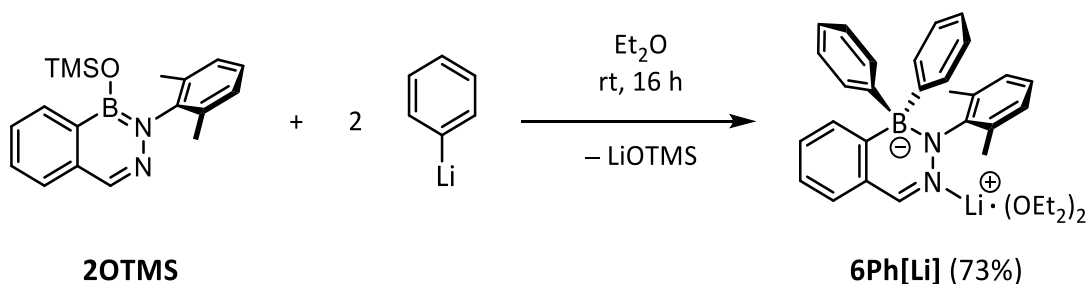

In a glovebox, compound **2OTMS** (105 mg, 326  $\mu\text{mol}$ , 1.00 eq.) was dissolved in diethyl ether (2 mL) and in a glass vial equipped with a stirring bar. Phenyllithium (54.8 mg, 652  $\mu\text{mol}$ , 2.00 eq.) was added in portions at ambient temperature. Upon addition, the immediate formation of a neon yellow solid was observed. The reaction suspension was stirred for 16 h in the glovebox at ambient temperature. The solid was separated via a PE-syringe equipped with a *Whatman* filter and the filter cake was washed with cold diethyl ether (1  $\times$  1 mL), *n*-pentane (1  $\times$  1 mL) and briefly dried *in vacuo*. **Yield of 6Ph[Li](OEt<sub>2</sub>)<sub>2</sub>**: 129 mg (238  $\mu\text{mol}$ , 73%), neon yellow solid. To obtain the adduct **6Ph[Li](thf)<sub>2.5</sub>**, some of the solid was re-dissolved in tetrahydrofuran (1 mL) and the solvent was removed under reduced pressure.

**<sup>1</sup>H NMR** (500 MHz, 298 K, THF-*d*<sub>8</sub>):  $\delta$  = 7.27-7.31 (m, 4H, *H*-13), 7.26 (s, 1H, *H*-1), 6.99 (d, <sup>3</sup>*J*<sub>HH</sub> = 7.31 Hz, *H*-3), 6.90 (ddd, <sup>3</sup>*J*<sub>HH</sub> = 7.30 Hz; 7.12 Hz, <sup>4</sup>*J*<sub>HH</sub> = 1.40 Hz, 1H, *H*-4), 6.75-6.80 (m, 5H, *H*-14 + *H*-5), 6.72 (d, <sup>3</sup>*J*<sub>HH</sub> = 7.03 Hz, 1H, *H*-6), 6.67 (tt, <sup>3</sup>*J*<sub>HH</sub> = 7.18 Hz, <sup>4</sup>*J*<sub>HH</sub> = 1.41 Hz, 2H, *H*-10), 6.55-6.58 (m, 2H, *H*-11), 6.50-6.53 (m, 1H, *H*-11), 3.59-3.63 (m, 7H, 1.75  $\times$  CH<sub>2</sub>-thf), 1.93 (s, 6H, -CH<sub>3</sub>), 1.75-1.78 (m, 7H, 1.75  $\times$  CH<sub>2</sub>-thf) ppm. **<sup>7</sup>Li NMR** (194 MHz, 298 K, THF-*d*<sub>8</sub>)  $\delta$  = -0.45 (s)

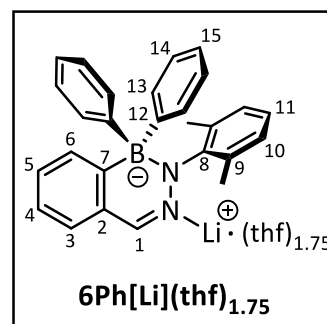

ppm. **<sup>11</sup>B{<sup>1</sup>H} NMR** (160 MHz, 298 K, THF-*d*<sub>8</sub>)  $\delta$  = -3.8 (br s) ppm. **<sup>13</sup>C{<sup>1</sup>H<sup>11</sup>B} NMR** (151 MHz, 298 K, THF-*d*<sub>8</sub>)  $\delta$  = 157.3 (C<sub>q</sub><sup>B</sup>-12), 152.1 (C<sub>q</sub><sup>B</sup>-7), 151.8 (C<sub>q</sub><sup>N</sup>-8), 138.6 (C-1), 138.5 (C<sub>q</sub>-9), 135.6 (C-13), 132.6 (C<sub>q</sub>-2), 132.1 (C-3), 127.9 (C-10), 127.8 (C-4), 125.5 (C-15), 123.6 (C-11), 123.1 (C-5), 123.0 (C-11), 122.2 (C-6), 68.0 (CH<sub>2</sub>-thf), 26.2 (CH<sub>2</sub>-thf), 21.2 (-CH<sub>3</sub>) ppm. **HRMS** (LIFDI, toluene): expected: *m/z* 386.2063, 387.2027, 388.2061, 389.2094 [C<sub>27</sub>H<sub>24</sub>BN<sub>2</sub>]<sup>+</sup>; found: *m/z* 386.2058, 387.2021, 388.2105, 389.2134 [C<sub>27</sub>H<sub>24</sub>BN<sub>2</sub>]<sup>+</sup>. Crystalline material of **6Ph[Li](OEt<sub>2</sub>)<sub>2</sub>** as neon yellow plates for single-crystal XRD was obtained by storing slow evaporation of a saturated THF solution at ambient temperature in a glovebox.

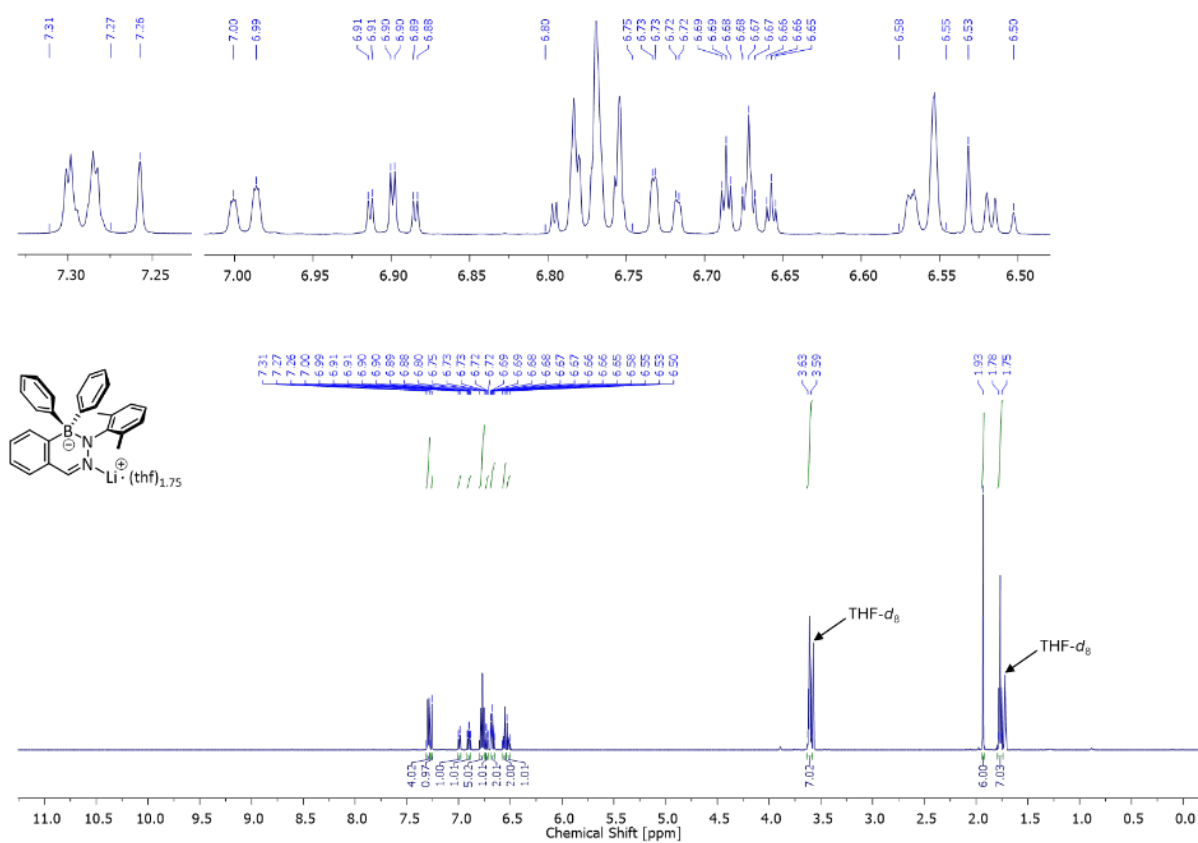

**Fig. S84** <sup>1</sup>H NMR spectrum of compound **6Ph[Li](thf)<sub>3</sub>** in THF-d<sub>8</sub>.

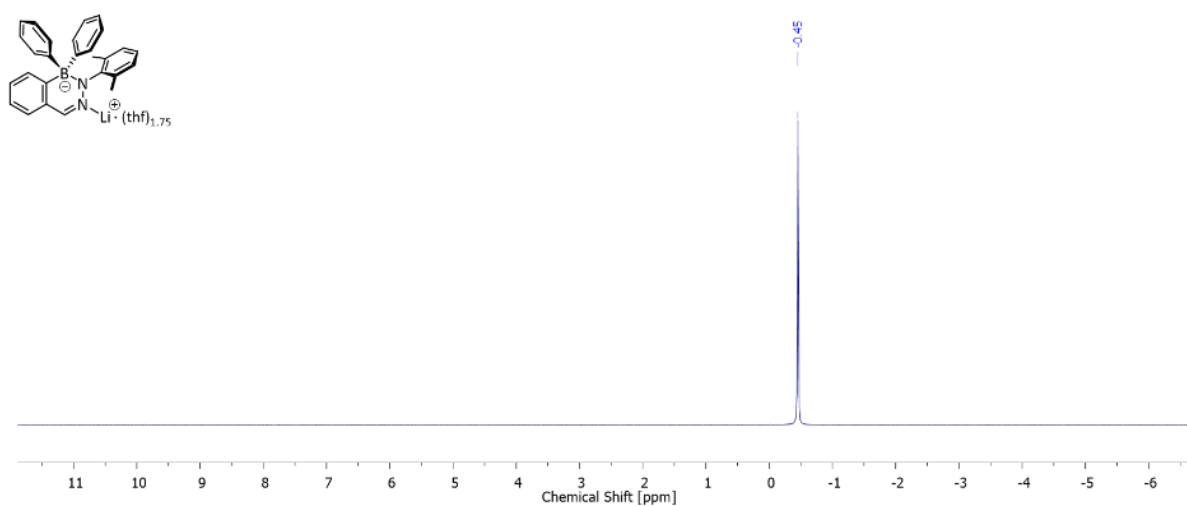

**Fig. S85** <sup>7</sup>Li NMR spectrum of compound **6Ph[Li](thf)<sub>3</sub>** in THF-d<sub>8</sub>.

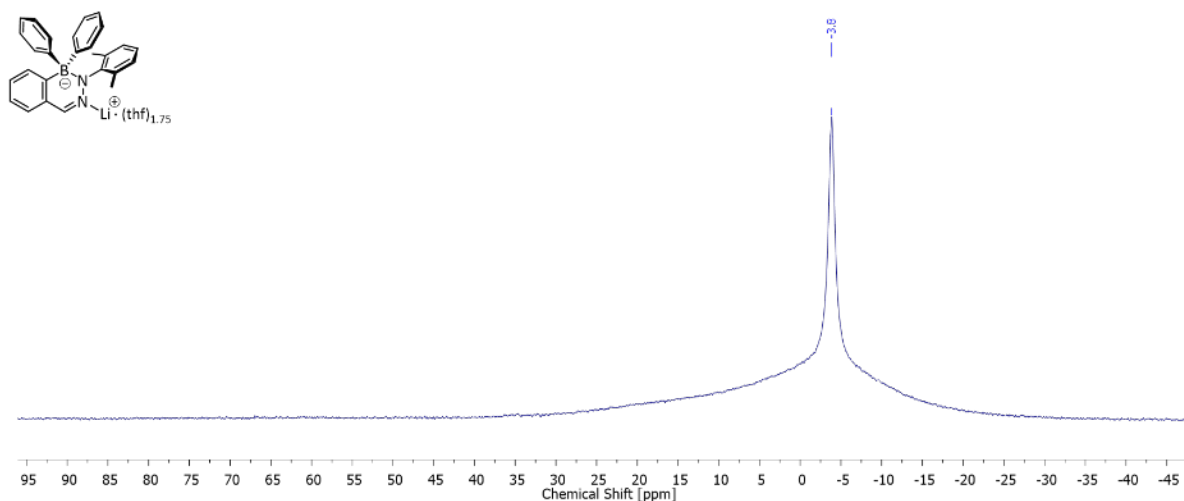

**Fig. S86** Background-reduced  $^{11}\text{B}\{^1\text{H}\}$  NMR spectrum of compound  $6\text{Ph}[\text{Li}](\text{thf})_3$  in  $\text{THF-}d_8$ .

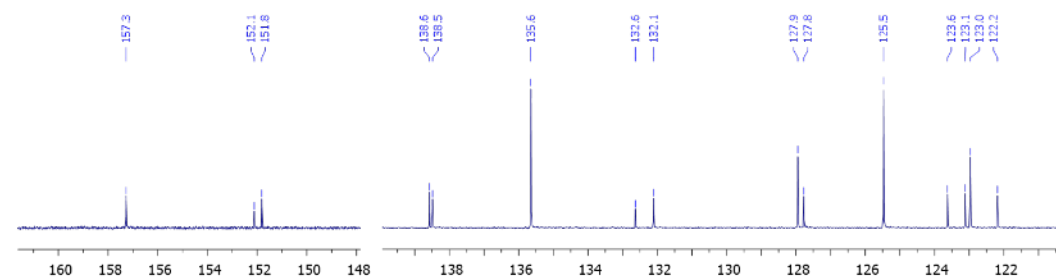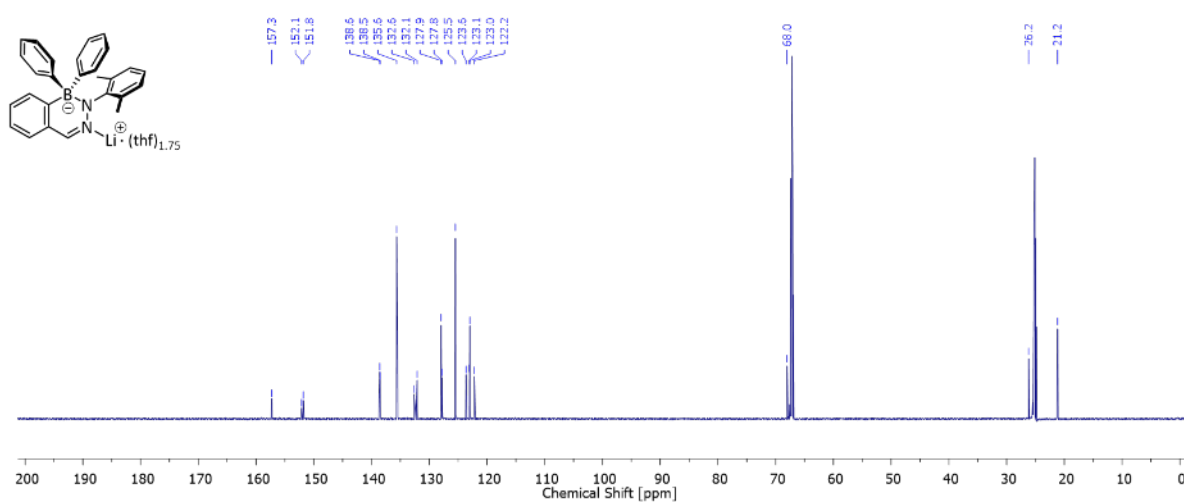

**Fig. S87**  $^{13}\text{C}\{^1\text{H}\}$  NMR spectrum of compound  $6\text{Ph}[\text{Li}](\text{thf})_3$  in  $\text{THF-}d_8$  (decoupled at  $-4$  ppm).

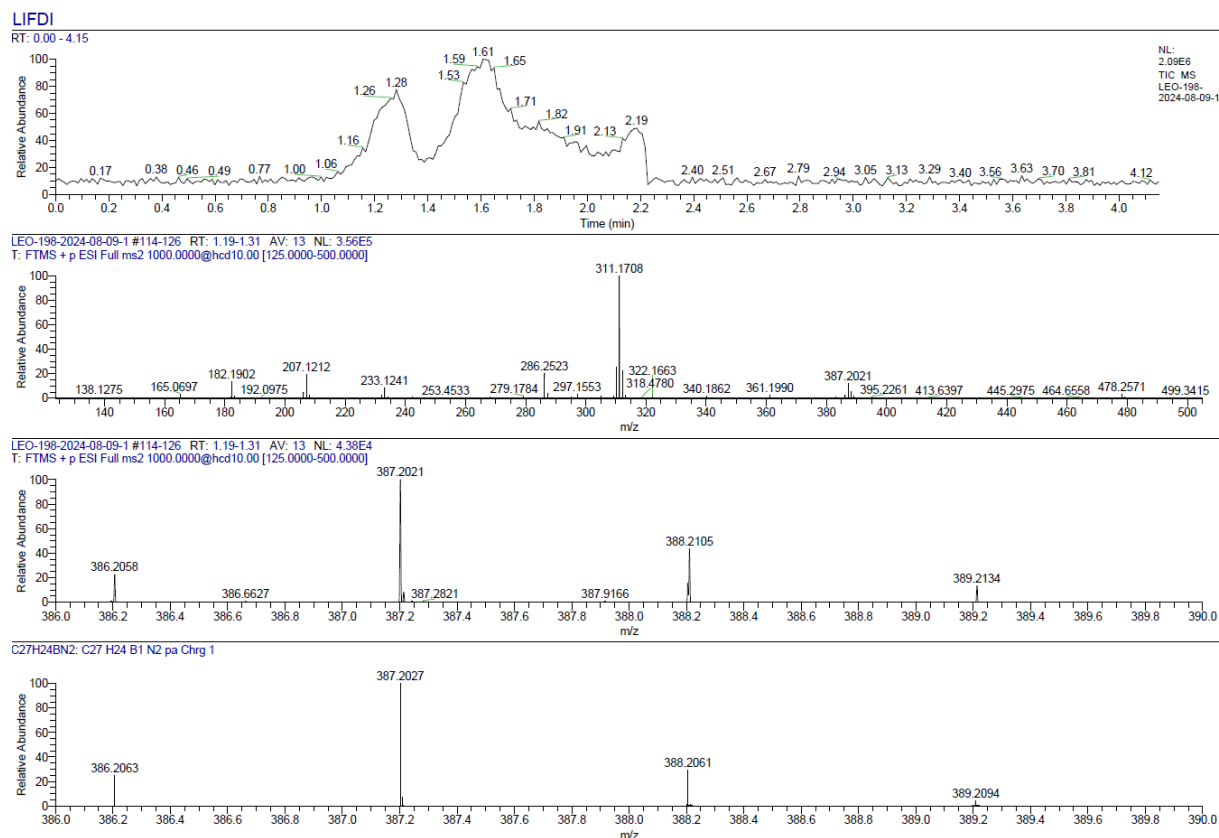

**Fig. S88** LIFDI mass spectrum of compound **6Ph[Li]** (toluene).

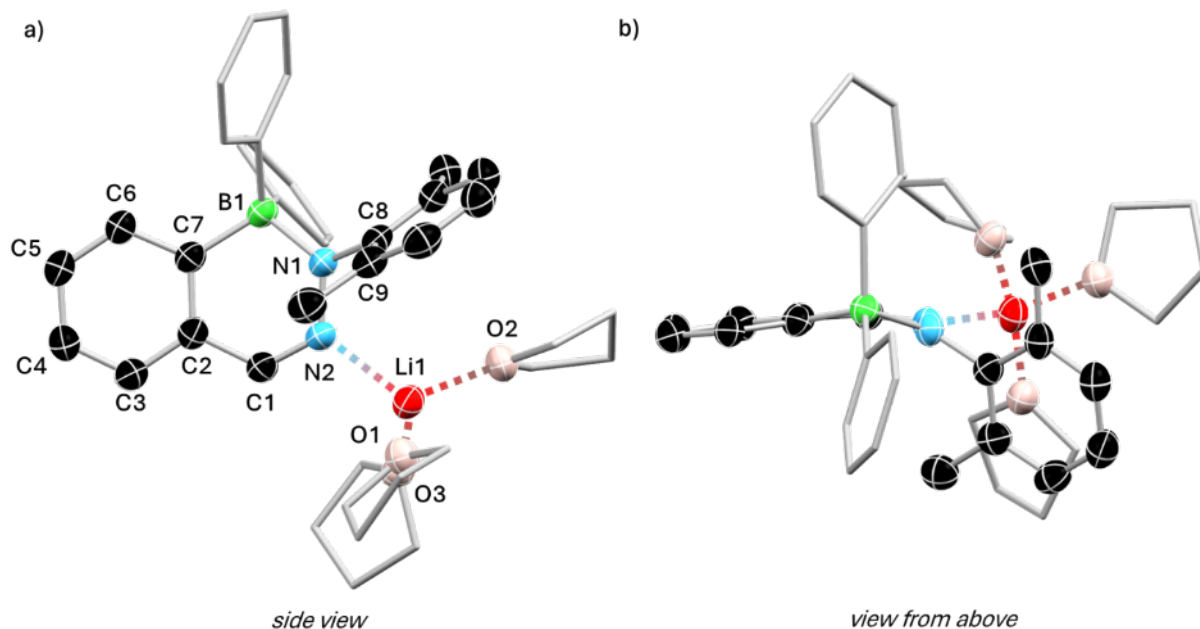

**Fig. S89** Molecular structure of compound **6Ph[Li](thf)<sub>3</sub>**. a) side view; b) view from above. Ellipsoids drawn at 50% probability (100 K). All H-atoms omitted. Selected bond lengths (Å) and angles (°) of **6Ph[Li](thf)<sub>3</sub>**. Due to the presence of a whole molecule disorder of the borate anion (see appendix), no discussion of bond length is possible.

Crystal data:  $C_{39}H_{47}BLiN_2O_3$ ,  $M_r = 609.53$ , clear yellow plate,  $0.130 \times 0.100 \times 0.050$  mm<sup>3</sup>, triclinic space group  $P\bar{1}$ ,  $a = 10.9272(2)$  Å,  $b = 17.6925(3)$  Å,  $c = 18.5888(4)$  Å,  $\alpha = 77.105(2)^\circ$ ,  $\beta = 80.910(2)^\circ$ ,  $\gamma = 88.455(2)^\circ$ ,  $V = 3459.01(12)$  Å<sup>3</sup>,  $Z = 4$ ,  $\rho_{\text{calcd}} = 1.170$  g·cm<sup>-3</sup>,  $\mu = 0.560$  mm<sup>-1</sup>,  $F(000) = 1308$ ,  $T = 100(2)$  K,  $R_1 = 0.0792$ ,  $wR_2 = 0.1856$ , 13516 independent reflections [ $2\theta \leq 148.268^\circ$ ] and 1420 parameters.



Reflections [3 -1 2], [3 3 3] and [6 2 0] were removed from refinement as outliers. All THF molecules are disordered. The atomic displacement parameters of all thf atoms O1\_1 to C5\_61 were restrained with RIGU keyword with esd = 0.008 in ShelXL input ('enhanced rigid bond' restraint for all bonds in the connectivity list). The displacement parameters of all thf atoms O1\_1 to C5\_61 were restrained to the same value with similarity restraint SIMU with esd = 0.008. The  $U_{ii}$  displacement parameters of all thf atoms O1\_1 to C5\_61 were restrained with ISOR keyword with esd 0 0.008 to approximate isotropic behavior. Both diazaborinin molecules with substituents had a whole molecule disorder. The atomic displacement parameters of the atoms B1\_7 to C6\_141 and the atoms of a xylyl substituent C1\_11 to C8\_119 were restrained with RIGU keyword with esd = 0.008 in ShelXL input ('enhanced rigid bond' restraint for all bonds in the connectivity list). The displacement parameters of the atoms B1\_7 to C6\_141 and the atoms of a xylyl substituent C1\_11 to C8\_119 were restrained to the same value with similarity restraint SIMU with esd = 0.008. The  $U_{ii}$  displacement parameters of the atoms B1\_7 to C6\_141 and the atoms of a xylyl substituent C1\_11 to C8\_119 were restrained with ISOR keyword with esd 0 0.008 to approximate isotropic behavior.

CCDC number: 2453542

### Lithium 3-phenyl-4-bis(phenyl)-4,3-borazarothieno[3,2-c]pyridinate (**7Ph[Li]**)

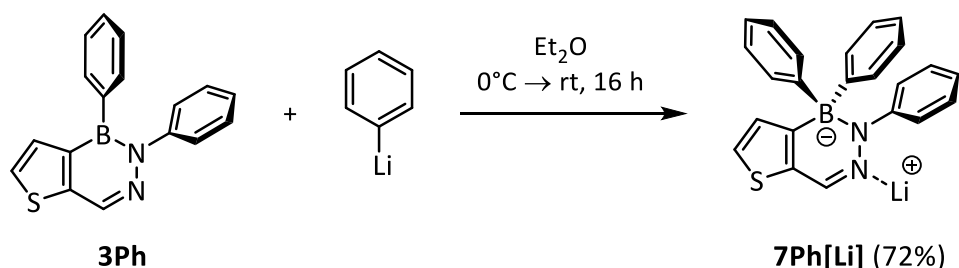

Compound **3Ph** (98.0 mg, 340  $\mu\text{mol}$ , 1.00 eq.) was dissolved in diethyl ether (5 mL) and cooled to 0 °C with a cooling bath (ice). Phenyllithium (1.9 M solution in diethyl ether, 0.18 mL, 340  $\mu\text{mol}$ , 1.00 eq.) was added in dropwise under rapid stirring. Upon addition, a color change to yellow was observed. The cooling bath was removed, and the solution was stirred for 16 h at ambient temperature. All volatile components were removed *in vacuo*. The remaining oil was re-dissolved in tetrahydrofurane, all volatile components were removed *in vacuo* again to exchange the coordinating solvent from diethyl ether to tetrahydrofurane and the remaining oil was lyophilized to obtain a powdery substance. **Yield of 7Ph[Li](thf)<sub>3</sub>**: 91.0 mg, 245  $\mu\text{mol}$ , 72% of a yellow solid. The compound is air- and moisture-sensitive.

**<sup>1</sup>H NMR** (600 MHz, C<sub>6</sub>D<sub>6</sub>, 298 K)  $\delta$  = 8.00 (d, 4H, <sup>3</sup>J<sub>HH</sub> = 6.84 Hz, *H*-11), 7.34 (t, 4H, <sup>3</sup>J<sub>HH</sub> = 7.55 Hz, *H*-12), 7.25 (d, 2H, <sup>3</sup>J<sub>HH</sub> = 7.82 Hz, *H*-7), 7.18 (tt, 1H, <sup>3</sup>J<sub>HH</sub> = 7.28 Hz, <sup>4</sup>J<sub>HH</sub> = 1.22 Hz, *H*-13), \*<sup>1</sup> 7.12 (d, 1H, <sup>3</sup>J<sub>HH</sub> = 4.58 Hz, *H*-3), 7.05 (d, 1H, <sup>3</sup>J<sub>HH</sub> = 4.85 Hz, *H*-4), 6.88 (t, 2H, <sup>3</sup>J<sub>HH</sub> = 7.82 Hz, *H*-8), 6.54 (t, 1H, <sup>3</sup>J<sub>HH</sub> = 7.11 Hz, *H*-9), 3.17 (m, 7H, 3 × CH<sub>2</sub>-thf), 1.22 (m, 7H, 3 × CH<sub>2</sub>-thf) ppm. ppm.

**<sup>7</sup>Li NMR** (223 MHz, 298 K, C<sub>6</sub>D<sub>6</sub>)  $\delta$  = -0.51 (s) ppm. **<sup>11</sup>B NMR** (193 MHz, 298 K, C<sub>6</sub>D<sub>6</sub>)  $\delta$  = -2.3 (s) ppm. **<sup>13</sup>C{<sup>1</sup>H<sup>11</sup>B} NMR** (151 MHz, C<sub>6</sub>D<sub>6</sub>, 298 K)  $\delta$  = 160.5 (C<sub>q</sub><sup>B</sup>-5), 157.1 (C<sub>q</sub><sup>B</sup>-10), 153.5 (C<sub>q</sub><sup>N</sup>-6), 135.0 (C-11), 134.6 (C-3), 133.4 (C-1), 129.1 (C-2), 128.8 (C-8), 127.0 (C-12), 125.8 (C-4), 124.2 (C-13), 119.4 (C-7), 118.7 (C-9) ppm. **HRMS** (LIFDI, toluene): expected: *m/z* 364.1315, 365.1278, 366.1312 [C<sub>23</sub>H<sub>18</sub>BN<sub>2</sub>S]; found: *m/z* 364.1311, 365.1274, 366.1306 [C<sub>23</sub>H<sub>18</sub>BN<sub>2</sub>S]. Crystalline material of **7Ph[Li](OEt<sub>2</sub>)<sub>2</sub>** as yellow blocks for single-crystal XRD was obtained from a different batch by skipping the tetrahydrofurane work-up step and slow evaporation of a saturated benzene solution at ambient temperature in a glovebox.

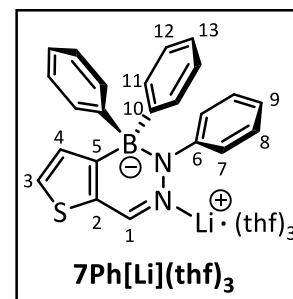

\*<sup>1</sup> Partially superimposed with C<sub>6</sub>D<sub>6</sub> solvent signal.

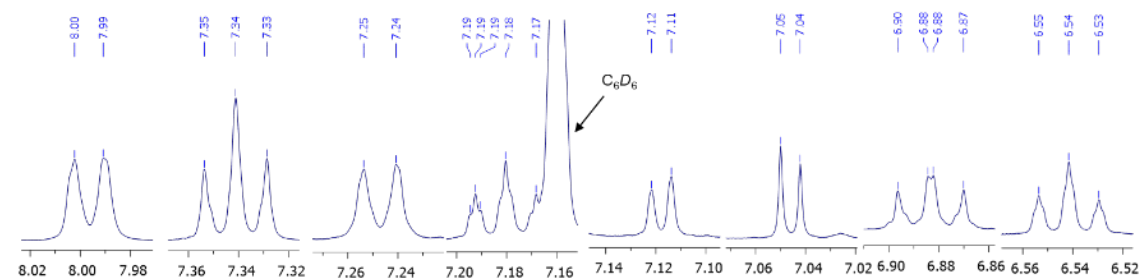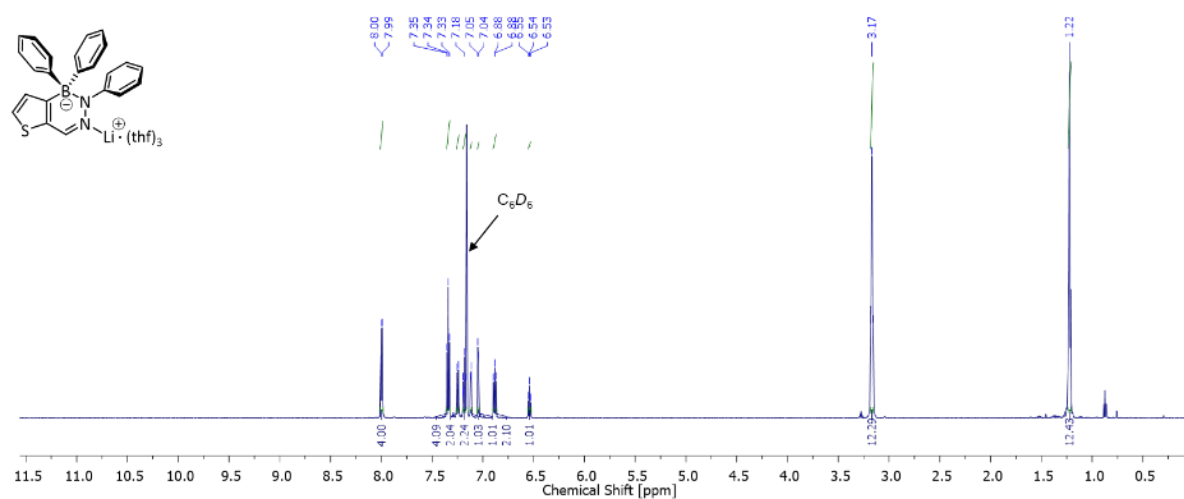

**Fig. S90** <sup>1</sup>H NMR spectrum of compound **7Ph[Li](thf)<sub>3</sub>** in C<sub>6</sub>D<sub>6</sub>.

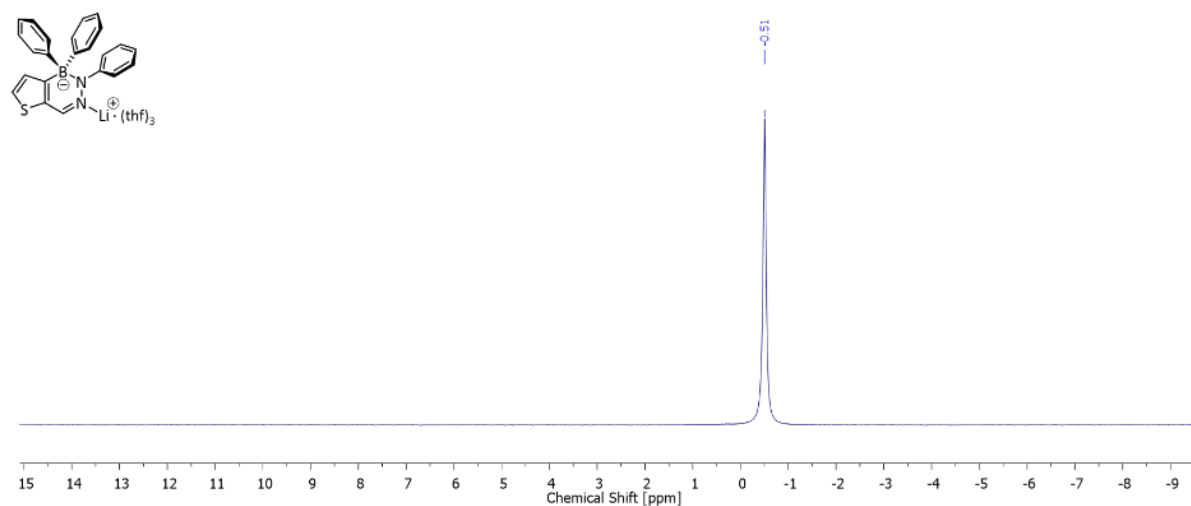

**Fig. S91** <sup>7</sup>Li NMR spectrum of compound **7Ph[Li](thf)<sub>3</sub>** in C<sub>6</sub>D<sub>6</sub>.

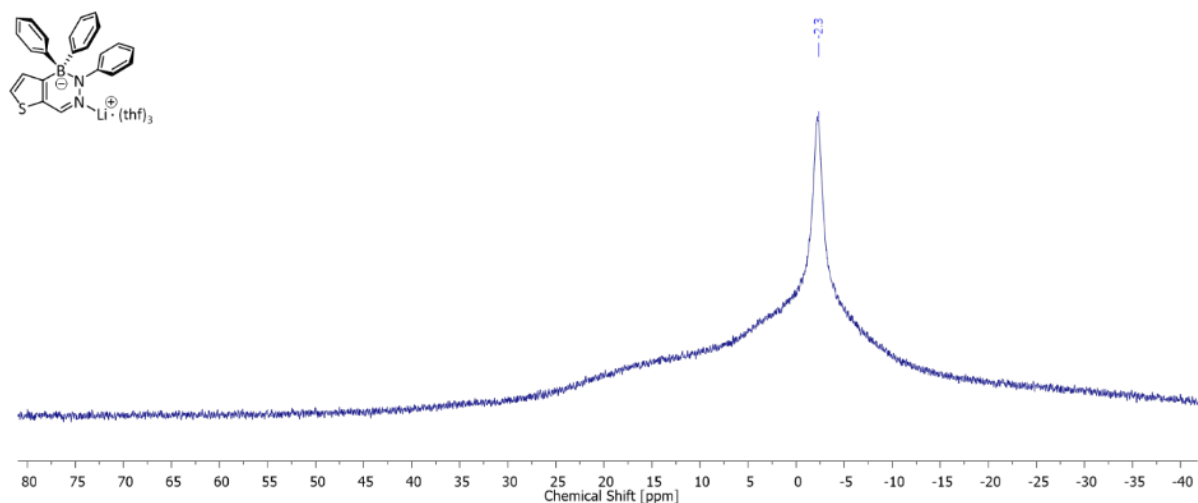

**Fig. S92** Background-reduced  $^{11}\text{B}$  NMR spectrum of compound  $7\text{Ph}[\text{Li}](\text{thf})_3$  in  $\text{C}_6\text{D}_6$ .

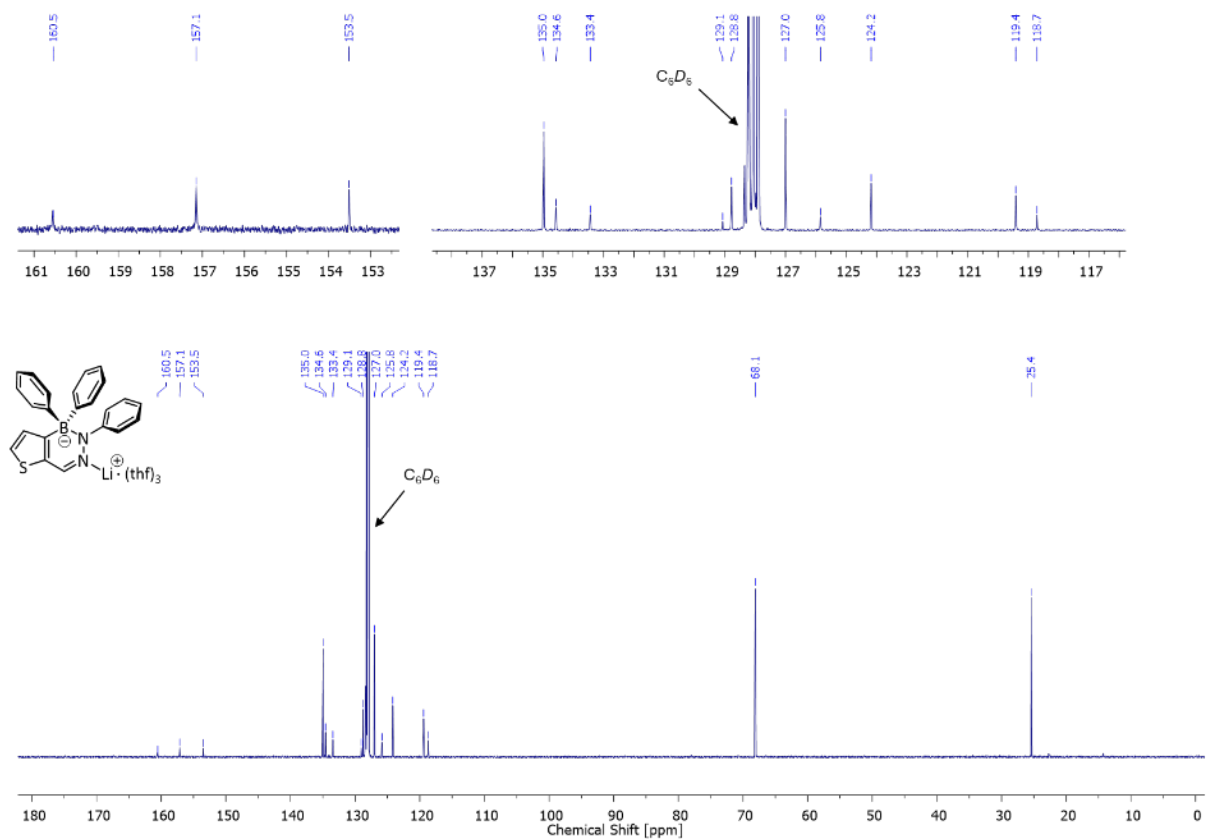

**Fig. S93**  $^{13}\text{C}\{^1\text{H}^{11}\text{B}\}$  NMR spectrum of compound  $7\text{Ph}[\text{Li}](\text{thf})_3$  in  $\text{C}_6\text{D}_6$  ( $^{11}\text{B}$  decoupled at  $-2.8$  ppm).

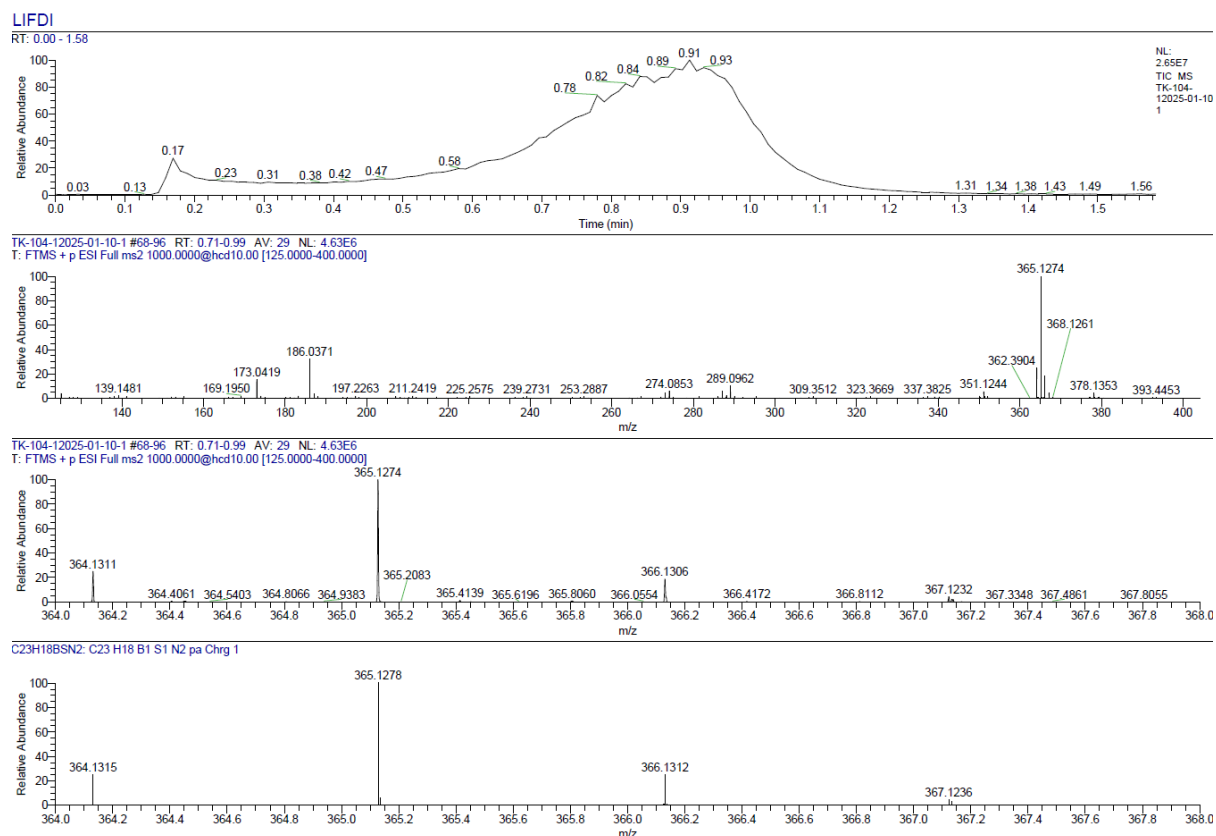

**Fig. S94** LIFDI mass spectrum of compound **7Ph[Li]** (toluene).

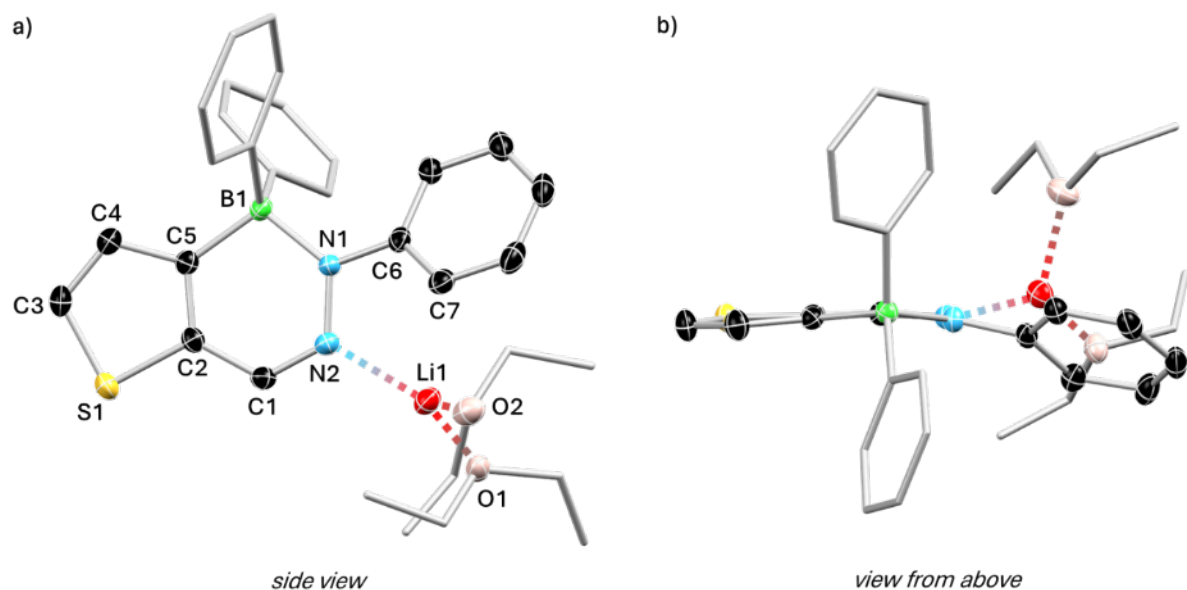

**Fig. S95** Molecular structure of compound **7Ph[Li](OEt)<sub>2</sub>**. a) side view; b) view from above. Ellipsoids drawn at 50% probability (100 K). All H-atoms omitted. Selected bond lengths (Å) and angles (°) of **7Ph[Li](OEt)<sub>2</sub>**: N2–Li1 2.042(4), B1–N1 1.619(2), N1–N2 1.384(3), N2–C1 1.297(2), C1–C2 1.428(3), C2–S1 1.7376(19), S1–C3 1.714(2), C3–C4 1.359(3), C4–C5 1.428(3), C2–C5 1.372(3), C5–B1 1.615(3), N1–C6 1.402(2), B1–N1–N2–C1 5.0(3), B1–C5–C2–C1 6.0(3), N2–N1–C6–C7 28.1(2).

Crystal data: C<sub>31</sub>H<sub>38</sub>BLiN<sub>2</sub>O<sub>2</sub>S, *M<sub>r</sub>* = 520.44, clear light yellow plate, 0.170×0.120×0.050 mm<sup>3</sup>, orthorhombic space group *P*2<sub>1</sub>2<sub>1</sub>2<sub>1</sub>, *a* = 9.01030(10) Å, *b* = 15.58450(10) Å, *c* = 20.4878(2) Å, *V* = 2876.92(5) Å<sup>3</sup>, *Z* = 4, *ρ*<sub>calcd</sub> = 1.202 g·cm<sup>−3</sup>, *μ* = 1.221 mm<sup>−1</sup>, *F*(000) = 1112, *T* = 100(2) K, *R*<sub>1</sub> = 0.0305, *wR*<sub>2</sub> = 0.0709, Flack parameter = 0.017(7), 5811 independent reflections [*2θ* ≤ 150.002°] and 348 parameters.

CCDC number: 2453543

### Lithium 1-Methyl-3-phenyl-4-bis(phenyl)-4,3-borazaroisoquinolate (**8Ph[Li]**)

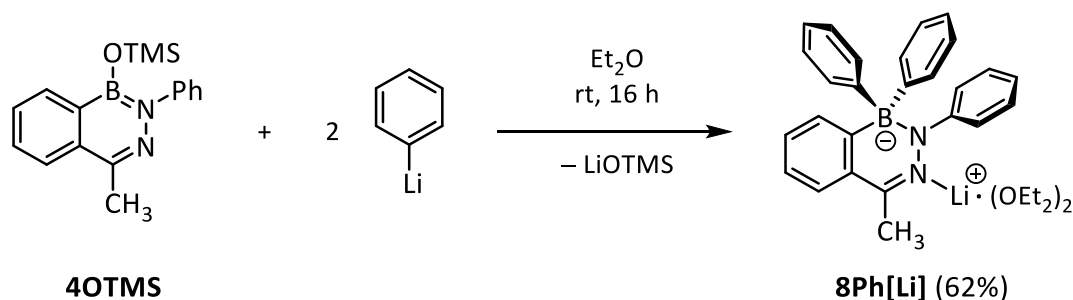

In a glovebox, compound **4OTMS** (167 mg, 542  $\mu$ mol, 1.00 eq.) was dissolved in diethyl ether (2 mL) and in a glass vial equipped with a stirring bar. Phenyllithium (91.0 mg, 1.08 mmol, 2.00 eq.) was added in portions at ambient temperature. Upon addition, the immediate formation of a neon yellow solid was observed. The reaction suspension was stirred for 16 h in the glovebox at ambient temperature. The solid was separated via a PE-syringe equipped with a *Whatman* filter and the filter cake was washed with cold diethyl ether (1  $\times$  1 mL), *n*-pentane (1  $\times$  1 mL) and briefly dried *in vacuo*. **Yield of 8Ph[Li](OEt<sub>2</sub>)<sub>2</sub>**: 177 mg (335  $\mu$ mol, 62%), neon yellow solid. To obtain the adduct **8Ph[Li](thf)<sub>2.5</sub>**, some of the solid was re-dissolved in tetrahydrofurane (1 mL) and the solvent was removed under reduced pressure.

**<sup>1</sup>H NMR** (500 MHz, 298 K, C<sub>6</sub>D<sub>6</sub>):  $\delta$  = 7.91 (d, <sup>3</sup>J<sub>HH</sub> = 6.47 Hz, 4H, *H*-13), 7.61 (d, <sup>3</sup>J<sub>HH</sub> = 7.31 Hz, 1H, *H*-6), 7.30-7.35 (m, 6H, *H*-14 + *H*-3 + *H*-5), 7.17-7.24 (m, 3H, *H*-15 + *H*-4), 7.13 (d, <sup>3</sup>J<sub>HH</sub> = 7.59 Hz, 2H, *H*-9), 6.85-6.90 (m, 2H, *H*-10), 6.53 (tt, <sup>3</sup>J<sub>HH</sub> = 7.19 Hz, <sup>4</sup>J<sub>HH</sub> = 1.23 Hz, 1H, *H*-11), 2.99-3.03 (m, 8H, 2  $\times$  CH<sub>2</sub>-thf), 2.00 (s, 3H, -CH<sub>3</sub>), 1.15-1.20 (m, 8H, 2  $\times$  CH<sub>2</sub>-thf) ppm. **<sup>7</sup>Li NMR** (194 MHz, 298 K, C<sub>6</sub>D<sub>6</sub>)  $\delta$  = -0.02 (s) ppm. **<sup>11</sup>B NMR** (160 MHz, 298 K, C<sub>6</sub>D<sub>6</sub>)  $\delta$  = -3.3 (br s) ppm. **<sup>13</sup>C{<sup>1</sup>H<sup>11</sup>B} NMR** (151 MHz, 298 K, C<sub>6</sub>D<sub>6</sub>)

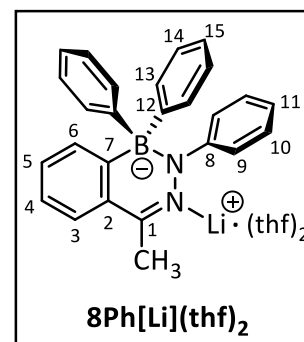

$\delta$  = 157.6 (C<sub>q</sub><sup>B</sup>-12), 156.0 (C<sub>q</sub><sup>B</sup>-7), 153.4 (C<sub>q</sub><sup>N</sup>-8), 145.3 (C-1), 135.3 (C-13), 134.6 (C-6), 131.5 (C<sub>q</sub>-2), 129.9 (C-5), 129.2 (C-10), 127.0 (C-14), 124.2 (C-4), 124.2 (C-15), 121.8 (C-3), 118.7 (C-9), 118.2 (C-11), 68.2 (CH<sub>2</sub>-thf), 25.3 (CH<sub>2</sub>-thf), 20.4 (-CH<sub>3</sub>) ppm. **HRMS** (LIFDI, THF): expected: *m/z* 372.1907, 373.1871, 374.1904 [C<sub>26</sub>H<sub>22</sub>BN<sub>2</sub>]<sup>+</sup>; found: *m/z* 372.1897, 373.1861, 374.1892 [C<sub>26</sub>H<sub>22</sub>BN<sub>2</sub>]<sup>+</sup>. Crystalline material of **8Ph[Li](OEt<sub>2</sub>)<sub>2</sub>** as neon yellow blocks for single-crystal XRD was obtained by slow evaporation of a saturated diethyl ether solution at ambient temperature in a glovebox.

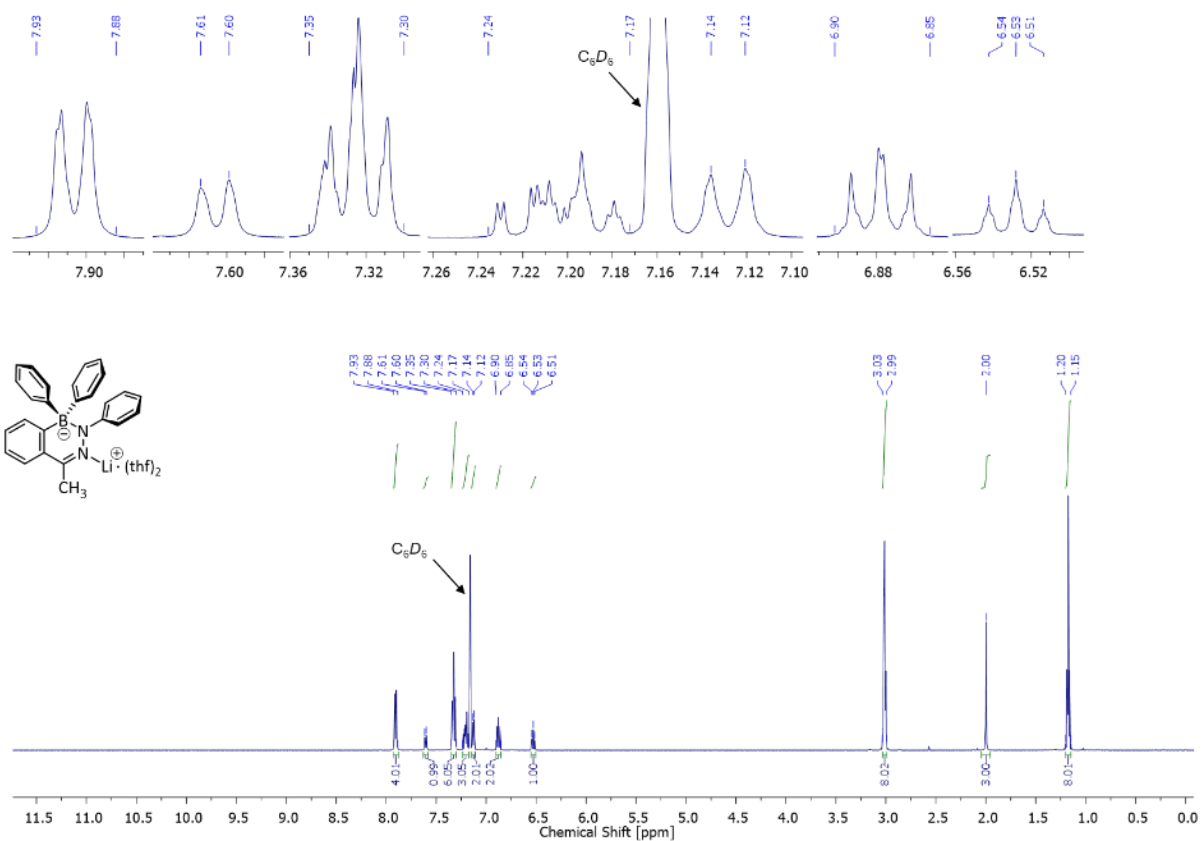

**Fig. S96** <sup>1</sup>H NMR spectrum of compound **8Ph[Li](thf)<sub>2</sub>** in C<sub>6</sub>D<sub>6</sub>.

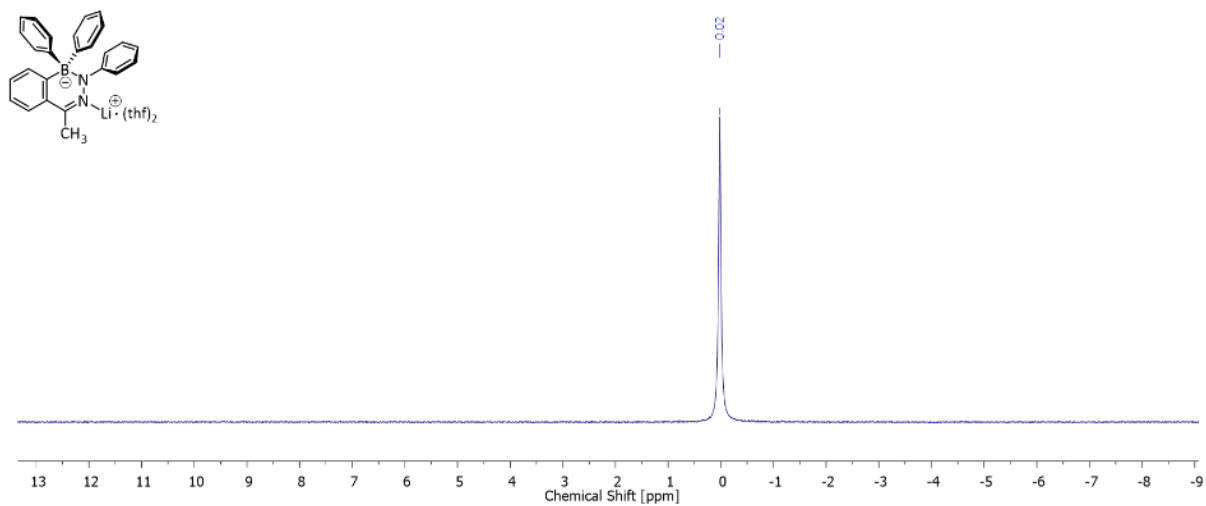

**Fig. S97** <sup>7</sup>Li NMR spectrum of compound **8Ph[Li](thf)<sub>2</sub>** in C<sub>6</sub>D<sub>6</sub>.

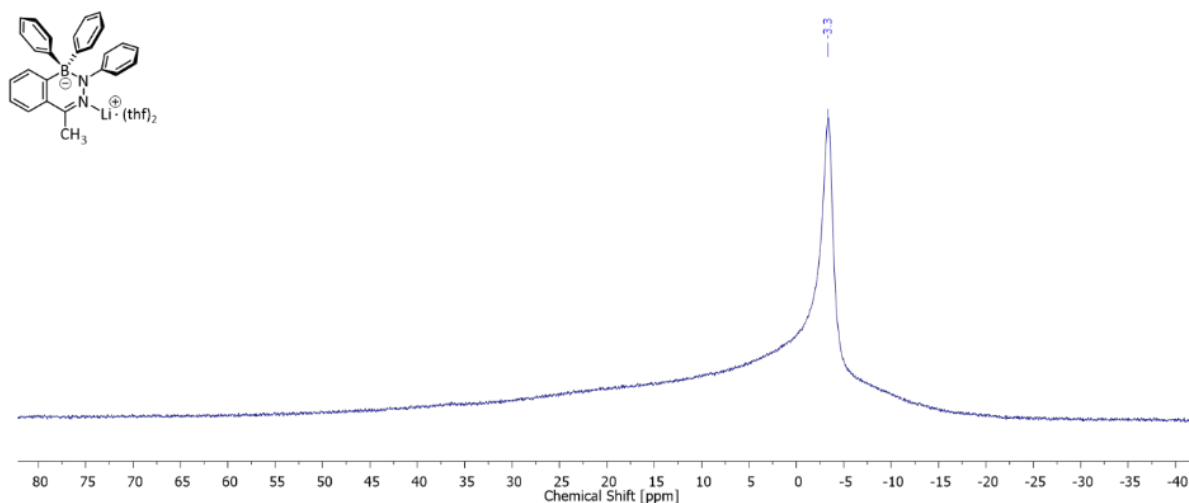

**Fig. S98** Background-reduced  $^{11}\text{B}$  NMR spectrum of compound  $8\text{Ph}[\text{Li}](\text{thf})_2$  in  $\text{C}_6\text{D}_6$ .

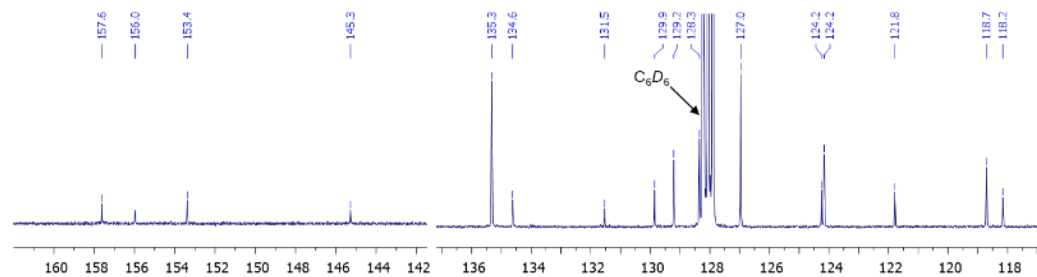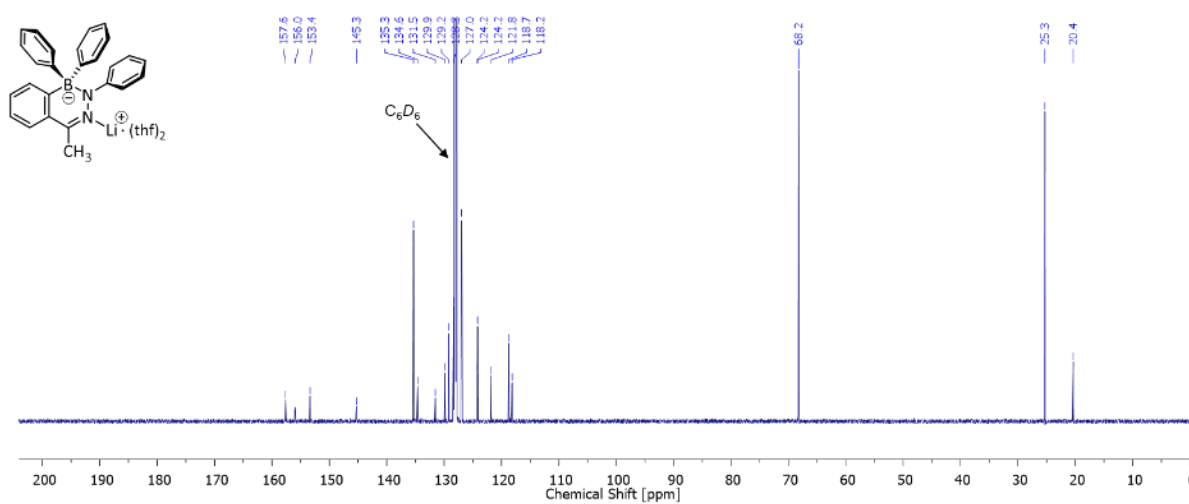

**Fig. S99**  $^{13}\text{C}\{^1\text{H}/^{11}\text{B}\}$  NMR spectrum of compound  $8\text{Ph}[\text{Li}](\text{thf})_2$  in  $\text{C}_6\text{D}_6$  (decoupled at  $-3$  ppm).



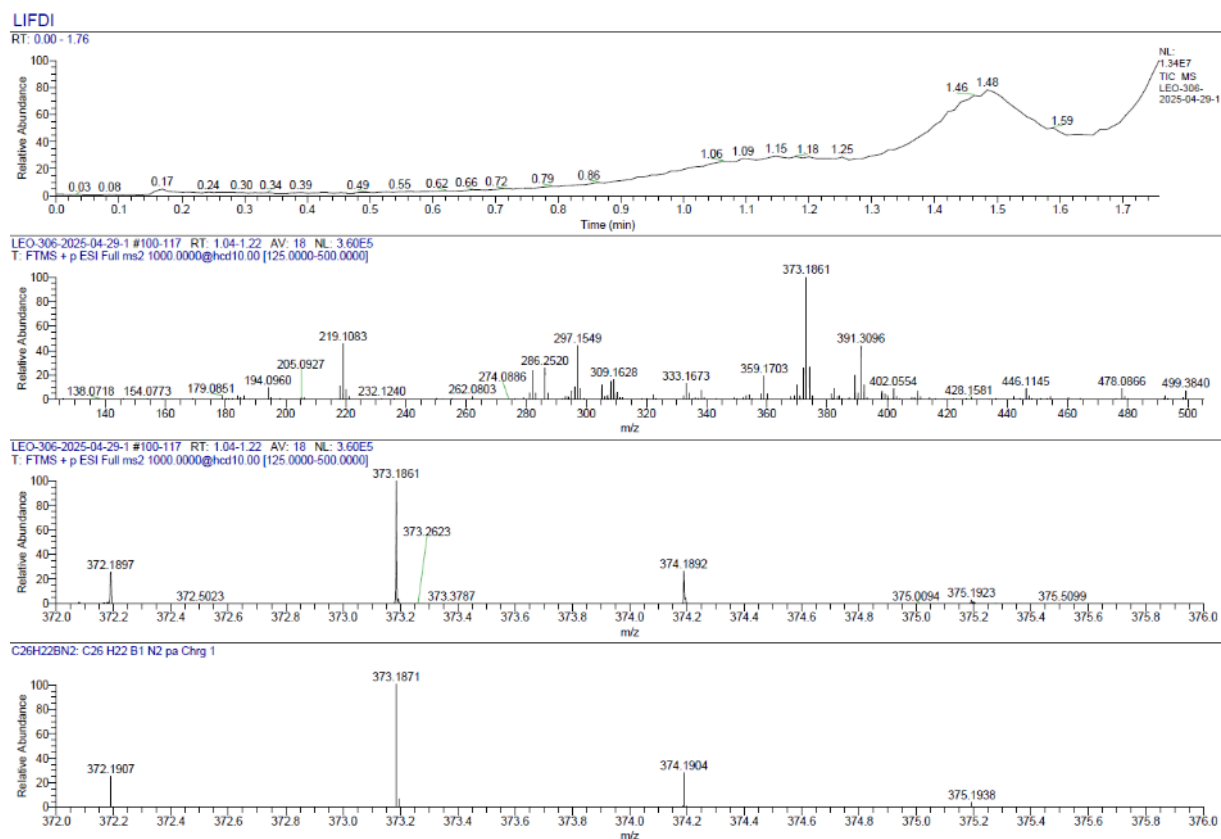

**Fig. S100** LIFDI mass spectrum of compound **8Ph[Li]** (THF).

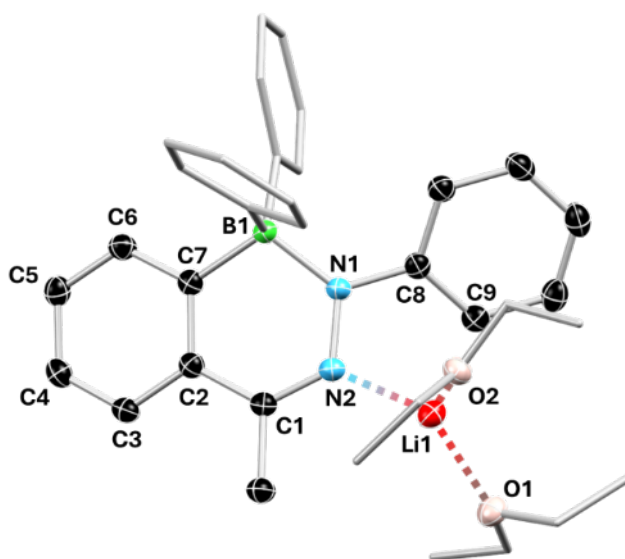

**Fig. S101** Molecular structure of compound **8Ph[Li](OEt<sub>2</sub>)<sub>2</sub>**. Ellipsoids drawn at 50% probability (100 K). All H-atoms omitted. Complexing ether rendered as wireframe for clarity. Selected bond lengths (Å) and angles (°) of **8Ph[Li](OEt<sub>2</sub>)<sub>2</sub>**: N2–Li1 2.056(2), B1–N1 1.5813(15), N1–N2 1.3891(12), N2–C1 1.3015(14), C1–C2 1.4667(15), C2–C3 1.4070(15), C3–C4 1.3864(16), C4–C5 1.3920(16), C5–C6 1.3896(16), C6–C7 1.4002(15), C2–C7 1.4063(15), C7–B1 1.6225(16), N1–C8 1.3949(14), B1–N1–N2–C1 23.31(14), B1–C7–C2–C1 5.24(15), N2–N1–C8–C9 29.04(14).

Crystal data: C<sub>34</sub>H<sub>42</sub>BLiN<sub>2</sub>O<sub>2</sub>, *M<sub>r</sub>* = 528.44, yellow block, 0.513×0.203×0.154 mm<sup>3</sup>, monoclinic space group *P*2<sub>1</sub>/*n*, *a* = 13.14620(10) Å, *b* = 13.84270(10) Å, *c* = 16.70950(10) Å, *β* = 101.4410(10)°, *V* = 2980.35(4) Å<sup>3</sup>, *Z* = 4, *ρ*<sub>calcd</sub> = 1.178 g·cm<sup>−3</sup>, *μ* = 0.548 mm<sup>−1</sup>, *F*(000) = 1136, *T* = 100(2) K, *R*<sub>1</sub> = 0.0391, *wR*<sub>2</sub> = 0.0984, 6006 independent reflections [*2θ* ≤ 150.828°] and 366 parameters.

CCDC number: 2453539

**<sup>1</sup>H NMR** (600 MHz, 298 K, THF-*d*<sub>8</sub>):  $\delta$  = 7.44 (d,  $^3J_{\text{HH}}$  = 6.81 Hz, 4H, *H*-13), 7.20 (d,  $^3J_{\text{HH}}$  = 7.91 Hz, 2H, *H*-9), 6.94-6.96 (m, 1H, *H*-3), 6.87 (t+m,  $^3J_{\text{HH}}$  = 7.61 Hz, 5H, *H*-14 + *H*-6), 6.71-6.76 (m, 4H, *H*-15 + *H*-4 + *H*-5), 6.64 (t,  $^3J_{\text{HH}}$  = 7.93 Hz, 2H, *H*-10), 6.19 (t,  $^3J_{\text{HH}}$  = 7.06 Hz, 1H, *H*-11), 2.85-2.90 (m, 8H, *H*-16), 2.27 (s, 3H, -CH<sub>3</sub>), 1.41-1.47 (m, 8H, *H*-17), 1.26 (sext,  $^3J_{\text{HH}}$  = 7.41 Hz, 8H, *H*-18), 0.93 (t,  $^3J_{\text{HH}}$  = 7.34 Hz, 12H, <sup>*n*</sup>Bu-CH<sub>3</sub>) ppm.

**<sup>11</sup>B NMR** (193 MHz, 298 K, THF-*d*<sub>8</sub>)  $\delta$  = -4.9 (br s) ppm. **<sup>13</sup>C{<sup>1</sup>H<sup>11</sup>B} NMR** (151 MHz, 298 K, THF-*d*<sub>8</sub>)  $\delta$  = 160.1 (C<sub>q</sub><sup>B</sup>-12), 156.7 (C<sub>q</sub><sup>B</sup>-7), 153.9 (C<sub>q</sub><sup>N</sup>-8), 136.0 (C<sub>q</sub>-1), 135.3 (C-13), 134.1 (C-6), 132.2 (C<sub>q</sub>-2), 126.7 (C-10), 126.4

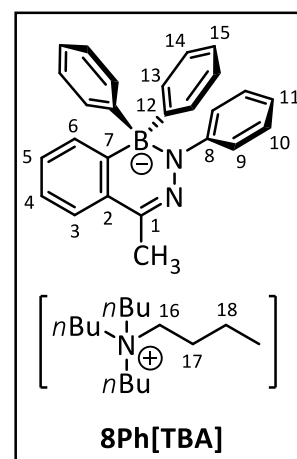

S86

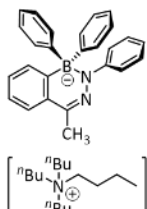

**Fig. S102**  $^1\text{H}$  NMR spectrum of compound **8Ph[TBA]** in  $\text{THF-}d_8$ .

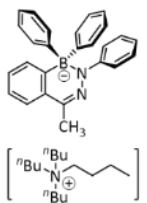

**Fig. S103** Background-reduced  $^{11}\text{B}$  NMR spectrum of compound **8Ph**[TBA] in  $\text{THF-}d_8$ .

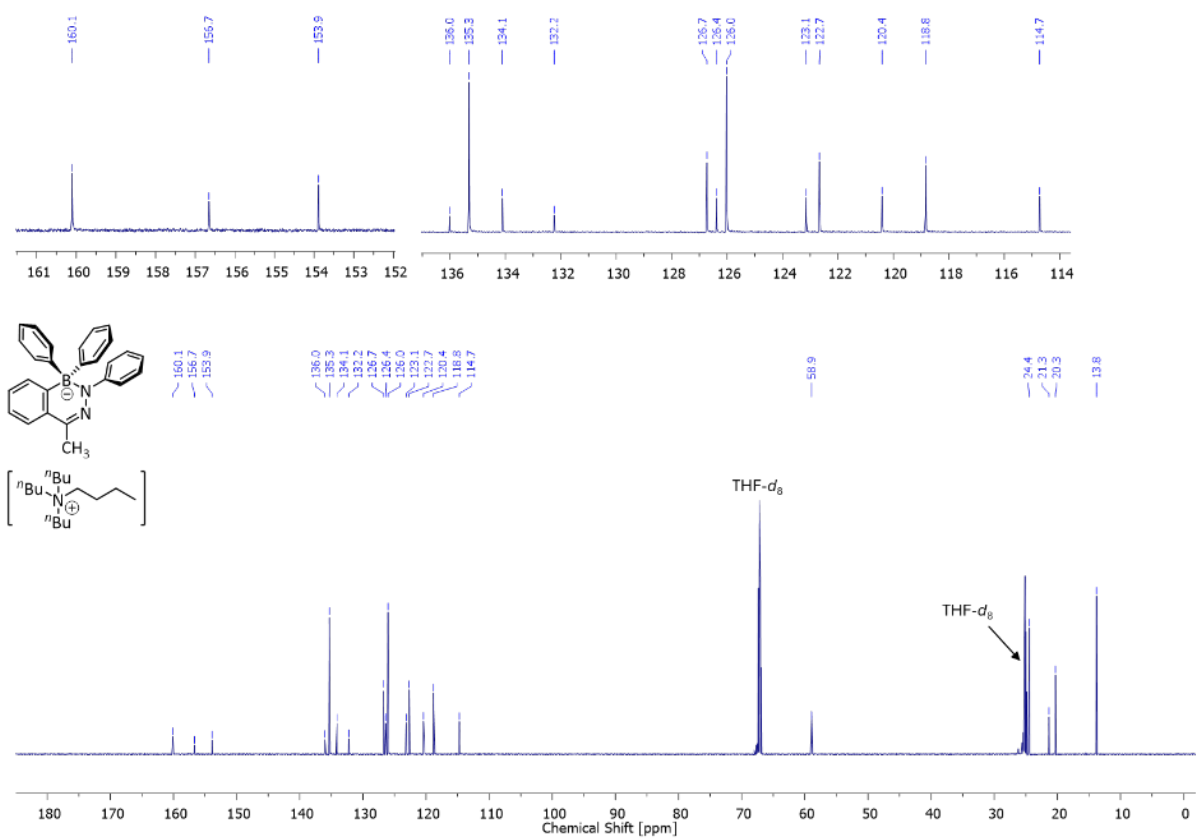

**Fig. S104**  $^{13}\text{C}\{^1\text{H}^{11}\text{B}\}$  NMR spectrum of compound **8Ph[TBA]** in THF- $d_8$  (decoupled at -6 ppm).

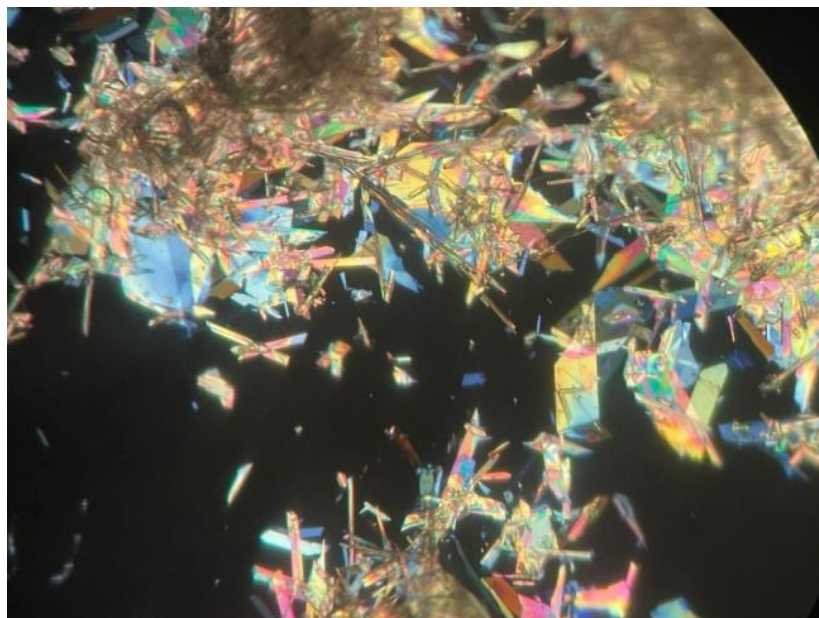

**Fig. S106** Crystals of compound **8Ph[TBA]**, grown from a THF/H<sub>2</sub>O mixture on air.

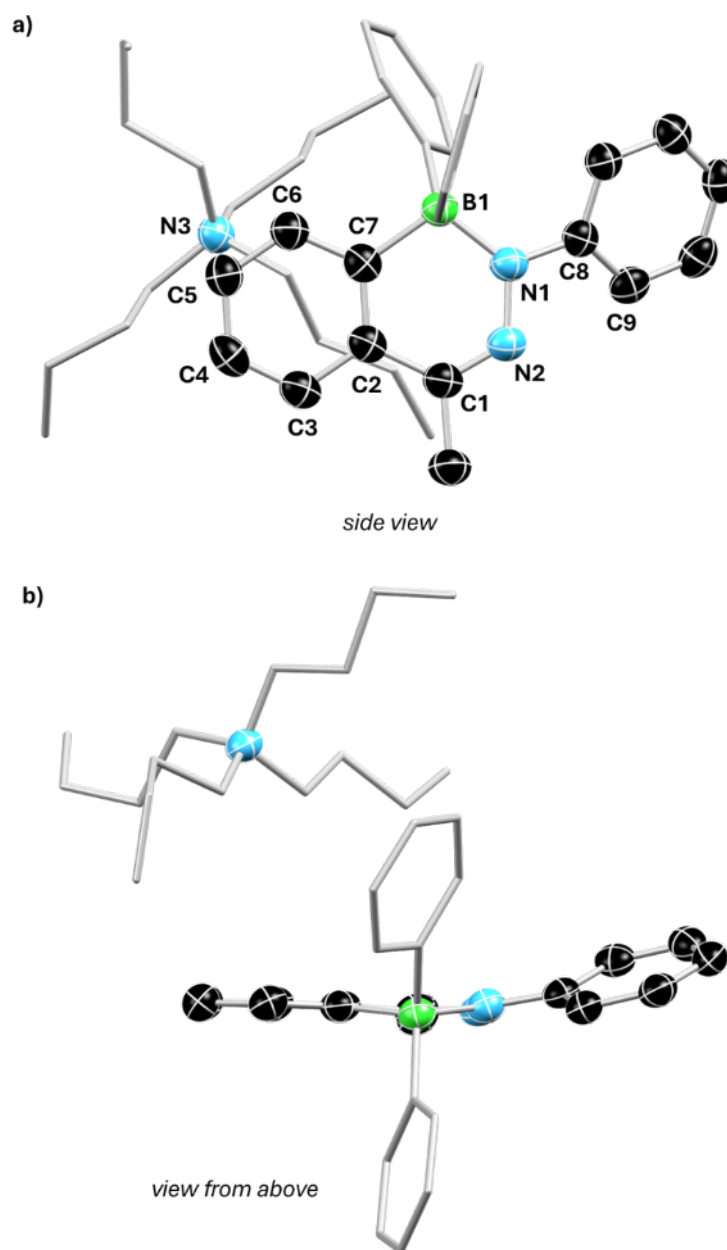

**Fig. S105** Molecular structure of compound **8Ph[TBA]**. Ellipsoids drawn at 50% probability (100 K). All H-atoms omitted, B-Ph substituents and *n*-butyl groups rendered as wireframe. Due to the presence of a whole molecule disorder of the borate anion, no discussion of bond lengths is possible.

Crystal data:  $C_{42}H_{58}BN_3$ ,  $M_r = 615.72$ , yellow plate,  $0.170 \times 0.120 \times 0.090$  mm<sup>3</sup>, monoclinic space group  $P2_1/n$ ,  $a = 9.6431(2)$  Å,  $b = 18.5866(4)$  Å,  $c = 20.3530(4)$  Å,  $\beta = 95.344(2)^\circ$ ,  $V = 3632.06(13)$  Å<sup>3</sup>,  $Z = 4$ ,  $\rho_{\text{calcd}} = 1.126$  g·cm<sup>-3</sup>,  $\mu = 0.482$  mm<sup>-1</sup>,  $F(000) = 1344$ ,  $T = 100(2)$  K,  $R_1 = 0.0918$ ,  $wR_2 = 0.2596$ , 7309 independent reflections [ $2\theta \leq 151.558^\circ$ ] and 426 parameters.

The reflections [1 1 5], [-1 1 4], [0 6 3], [2 3 5] and [2 4 4] were removed from the refinement as outliers. The structure shows a whole molecule disorder with an occupancy factor of 95.7% regarding to the second free variable. The geometry of the disordered diazaborinate part (residues 11, 21, 31, and 41) were constrained using AFIX 6 during refinement. The atoms of the disordered diazaborinate part (residues 11, 21, 31, and 41) were refined isotropic with constrained  $U_{\text{iso}}$ . The value of this tensor was computed using a free variable and SIMU command.

CCDC number: 2453537

## Appendix

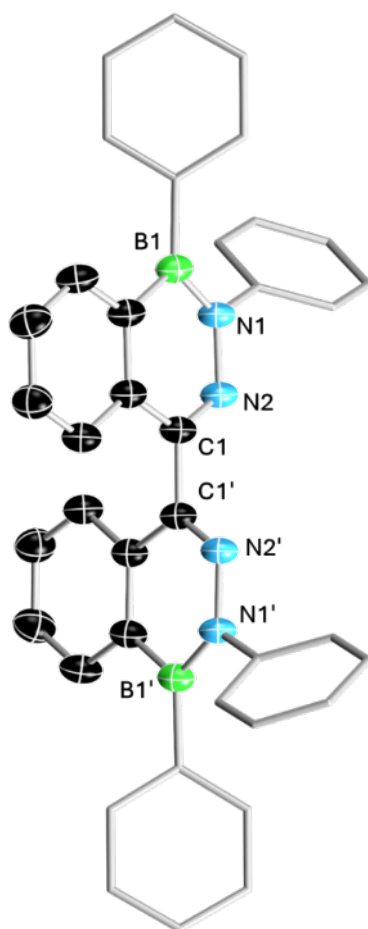

**Fig. S107** Molecular structure of decomposition product **9**. Ellipsoids drawn at 50% probability (100 K). All H-atoms omitted. Selected bond lengths (Å) and angles (°) of **9**: B1–N1 1.424(2), N1–N2 1.394(1), N2–C1 1.295(2), C1–C1' 1.505(1), B1–N1–N2–C1 2.5(2), N2–C1–C1'–N2' 79.5(1).

Crystal data:  $\text{C}_{38}\text{H}_{28}\text{B}_2\text{N}_4$ ,  $M_r = 562.26$ , red plate,  $0.060 \times 0.060 \times 0.030 \text{ mm}^3$ , monoclinic space group  $C2/c$ ,  $a = 16.5211(3) \text{ Å}$ ,  $b = 12.6459(2) \text{ Å}$ ,  $c = 15.0585(3) \text{ Å}$ ,  $\beta = 112.305(2)^\circ$ ,  $V = 2910.68(10) \text{ Å}^3$ ,  $Z = 4$ ,  $\rho_{\text{calcd}} = 1.283 \text{ g}\cdot\text{cm}^{-3}$ ,  $\mu = 0.578 \text{ mm}^{-1}$ ,  $F(000) = 1176$ ,  $T = 100(2) \text{ K}$ ,  $R_1 = 0.0465$ ,  $wR_2 = 0.1043$ , 2925 independent reflections [ $2\theta \leq 147.416^\circ$ ] and 199 parameters.

CCDC number: 2453634

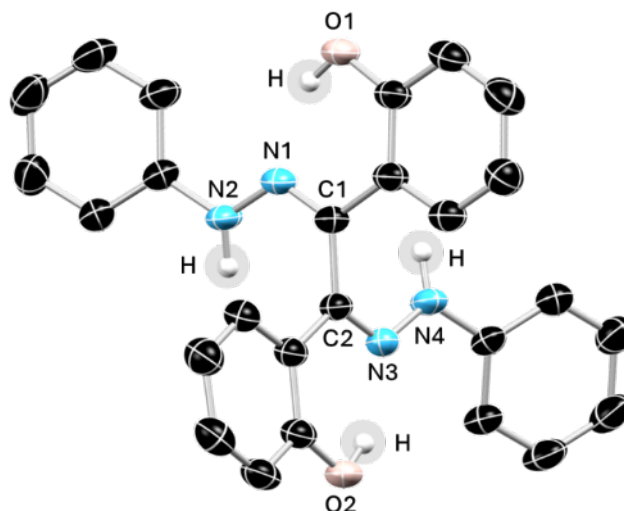

**Fig. S108** Molecular structure of decomposition product **10**. Ellipsoids drawn at 50% probability (100 K). All H-atoms except for those bound to a heteroatom omitted. Selected bond lengths (Å) and angles (°) of **10**: C1–N1 1.297(2), N1–N2 1.347(2), C1–C2 1.505(3), C2–N3 1.293(3), N3–N4 1.353(3), N1–C1–C2–N3 97.9(2).

One of the co-crystallized benzene molecules was disordered. Geometry was idealized using AFIX66. One half of the molecule is symmetry generated due to its position on symmetry elements in the cell.

Crystal data:  $\text{C}_{38}\text{H}_{34}\text{N}_4\text{O}_2$ ,  $M_r = 578.69$ , clear red needle,  $0.230 \times 0.030 \times 0.030 \text{ mm}^3$ , triclinic space group  $P\bar{1}$ ,  $a = 10.1284(4) \text{ Å}$ ,  $b = 12.2505(5) \text{ Å}$ ,  $c = 13.3672(5) \text{ Å}$ ,  $\alpha = 82.511(3)^\circ$ ,  $\beta = 89.613(3)^\circ$ ,  $\gamma = 70.539(4)^\circ$ ,  $V = 1549.29(11) \text{ Å}^3$ ,  $Z = 2$ ,  $\rho_{\text{calcd}} = 1.240 \text{ g}\cdot\text{cm}^{-3}$ ,  $\mu = 0.612 \text{ mm}^{-1}$ ,  $F(000) = 612$ ,  $T = 100(2) \text{ K}$ ,  $R_1 = 0.0882$ ,  $wR_2 = 0.1690$ , 6069 independent reflections [ $2\theta \leq 149.226^\circ$ ] and 428 parameters.

CCDC number: 2453635

**Table S2**

Attempted reaction conditions for a rational synthesis of a bis(diazaborinine) in analogy to the decomposition product **9**, by coupling of a neutral Duryl-congener **11** (to avoid hydrolysis / oxidation to **10**) via Scholl-reaction conditions or reductive coupling.

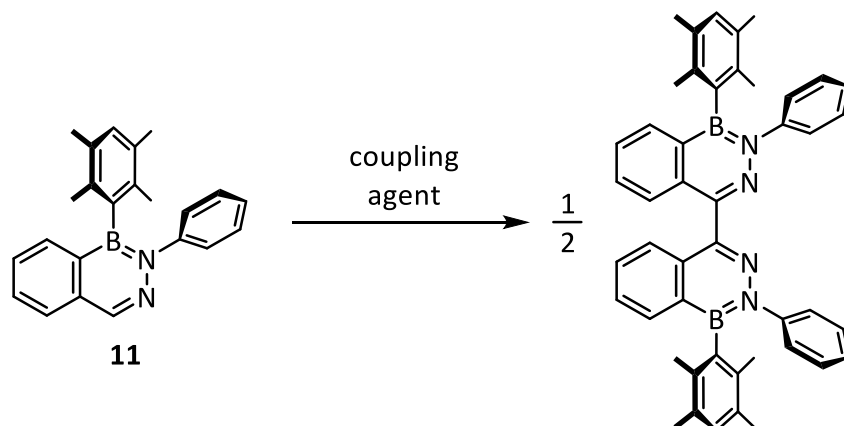

| Starting Material | Coupling Agent                                  | Reaction conditions                             | Observation                               | Possible Outcome                                            |
|-------------------|-------------------------------------------------|-------------------------------------------------|-------------------------------------------|-------------------------------------------------------------|
| <b>11</b>         | FeCl <sub>3</sub>                               | 2 eq., CD <sub>2</sub> Cl <sub>2</sub>          | red solution<br><sup>1</sup> H: broad     | <b>11</b> →FeCl <sub>3</sub> adduct                         |
| <b>11</b>         | FeCl <sub>3</sub>                               | cat., C <sub>6</sub> D <sub>6</sub>             | red solution<br><sup>1</sup> H: broad     | <b>11</b> →FeCl <sub>3</sub> adduct                         |
| <b>11</b>         | FeCl <sub>3</sub>                               | 1 eq., CDCl <sub>3</sub>                        | red solution<br><sup>11</sup> B: 57 ppm   | <b>11</b> →FeCl <sub>3</sub> adduct                         |
| <b>11</b>         | AlCl <sub>3</sub>                               | 1 eq., C <sub>6</sub> D <sub>6</sub>            | Colorless                                 | <b>11</b> →AlCl <sub>3</sub> adduct<br>(observed via XRD)   |
| <b>11</b>         | AlCl <sub>3</sub>                               | 2.5 eq., CD <sub>2</sub> Cl <sub>2</sub>        | red solution<br>(fast)                    | new species but <i>H</i> -1<br>still observed as<br>singlet |
| <b>11</b>         | AlCl <sub>3</sub>                               | 2.5 eq.,<br>bromobenzene- <i>d</i> <sub>5</sub> | red solution<br>(slow)                    |                                                             |
| <b>11</b>         | AlCl <sub>3</sub>                               | xs., CDCl <sub>3</sub>                          | violet<br>oil                             | decomposition                                               |
| <b>11</b>         | AlCl <sub>3</sub> , CuCl <sub>2</sub><br>(cat.) | 1 eq., CD <sub>2</sub> Cl <sub>2</sub>          | violet<br>paramagnet.                     | -                                                           |
| <b>11</b>         | DDQ + TFA                                       | CD <sub>2</sub> Cl <sub>2</sub>                 | no reaction<br>(several days<br>at 50 °C) | [ <b>11</b> ] <sup>+</sup> [TFA] <sup>-</sup><br>recovered  |
| <b>11</b>         | Lithium<br>naphthalene                          | 1.00 eq., THF / DME                             | red solution                              | [ <b>11</b> ] <sup>-</sup> radical anion                    |
| <b>11</b>         | Li-sand                                         | xs., THF                                        | red solution                              | [ <b>11</b> ] <sup>-</sup> radical anion                    |
| <b>11</b>         | KC <sub>8</sub>                                 | xs., C <sub>6</sub> D <sub>6</sub> / THF        | no reaction                               | <b>11</b>                                                   |
| <b>11</b>         | B <sub>2</sub> pin <sub>2</sub> <sup>7</sup>    | 0.5 eq., C <sub>6</sub> D <sub>6</sub>          | no reaction                               | no B <sub>2</sub> pin <sub>2</sub> adduct<br>formation      |



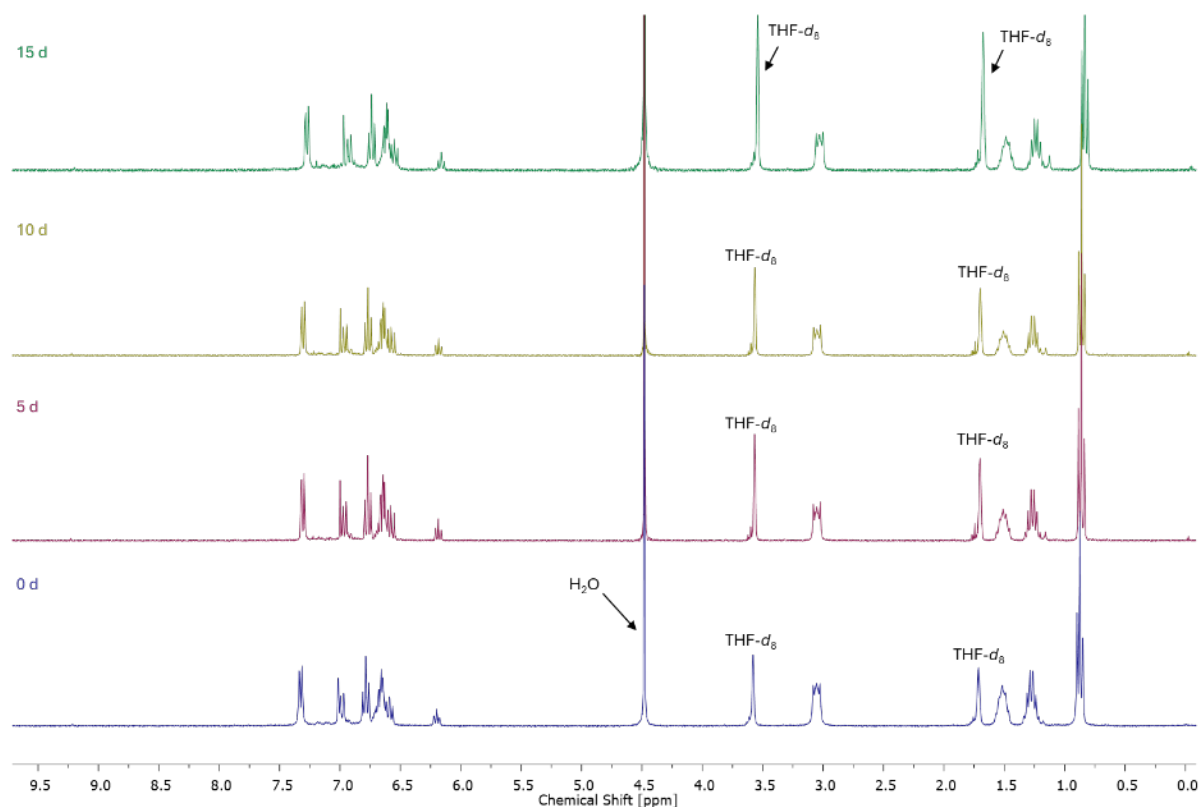

**Fig. S109** Stacked hydrolysis study  $^1\text{H}$  NMR spectra of compound **5Ph[TBA]** in a 1:1 mixture of  $\text{THF-}d_8$  and  $\text{H}_2\text{O}$  after 10 min, 5 d, 10 d and 15 d under Ar-atmosphere at ambient temperature.

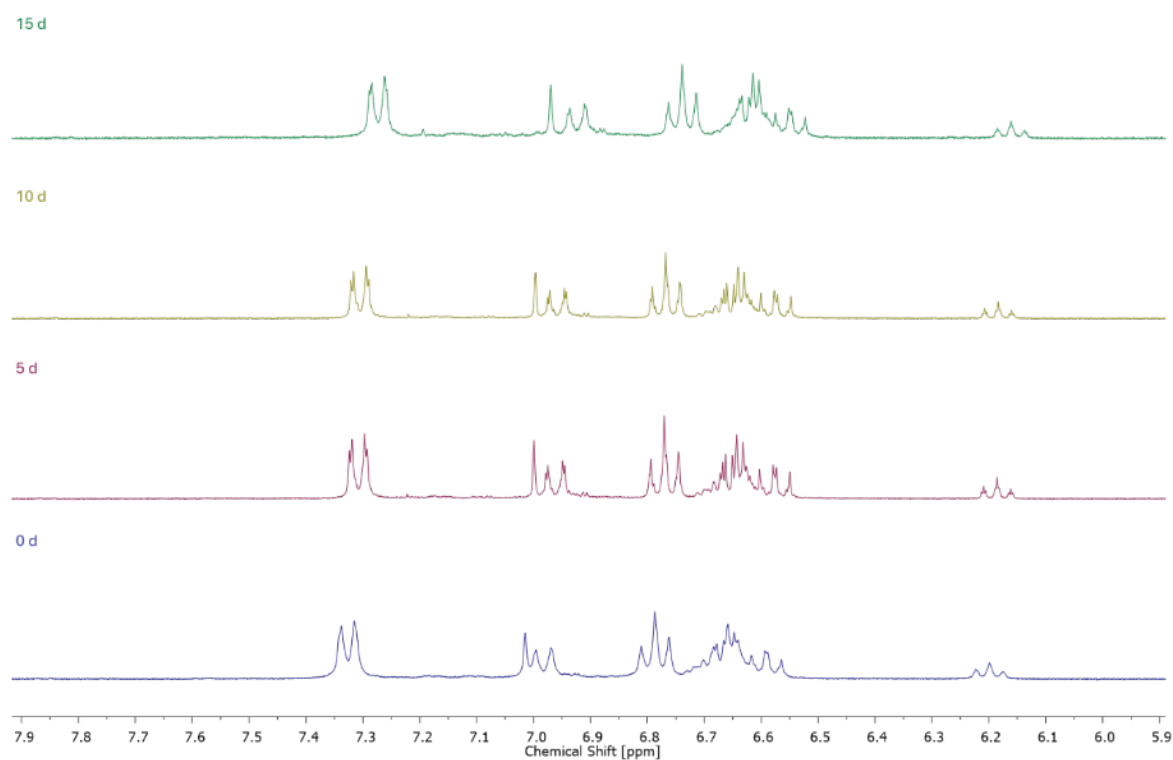

**Fig. S110** Stacked hydrolysis study  $^1\text{H}$  NMR spectra (aromatic region) of compound **5Ph[TBA]** in a 1:1 mixture of  $\text{THF-}d_8$  and  $\text{H}_2\text{O}$  after 10 min, 5 d, 10 d and 15 d under Ar-atmosphere at ambient temperature.

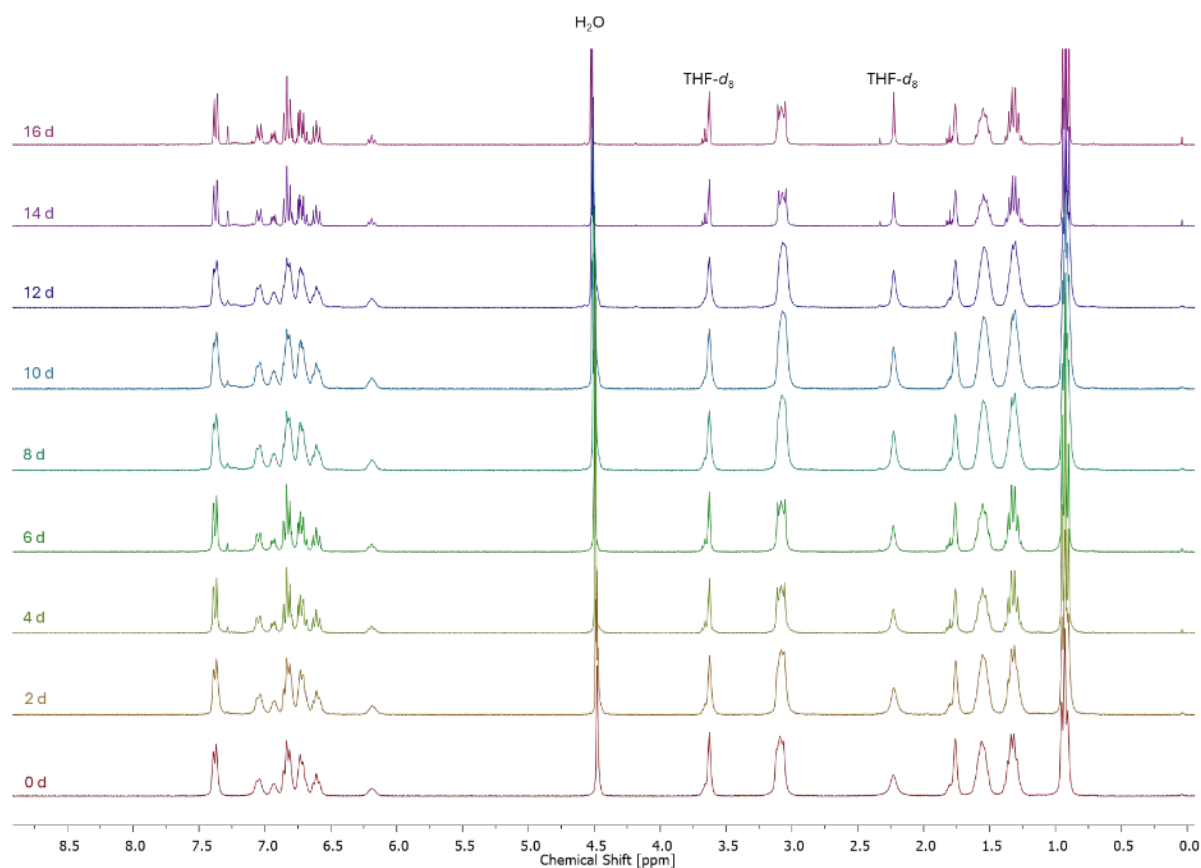

**Fig. S111** Stacked hydrolysis study  $^1\text{H}$  NMR spectra of compound **8Ph[TBA]** in a 1:1 mixture of  $\text{THF-}d_8$  and  $\text{H}_2\text{O}$  open to the atmosphere after over a time period of 16 d at ambient temperature.

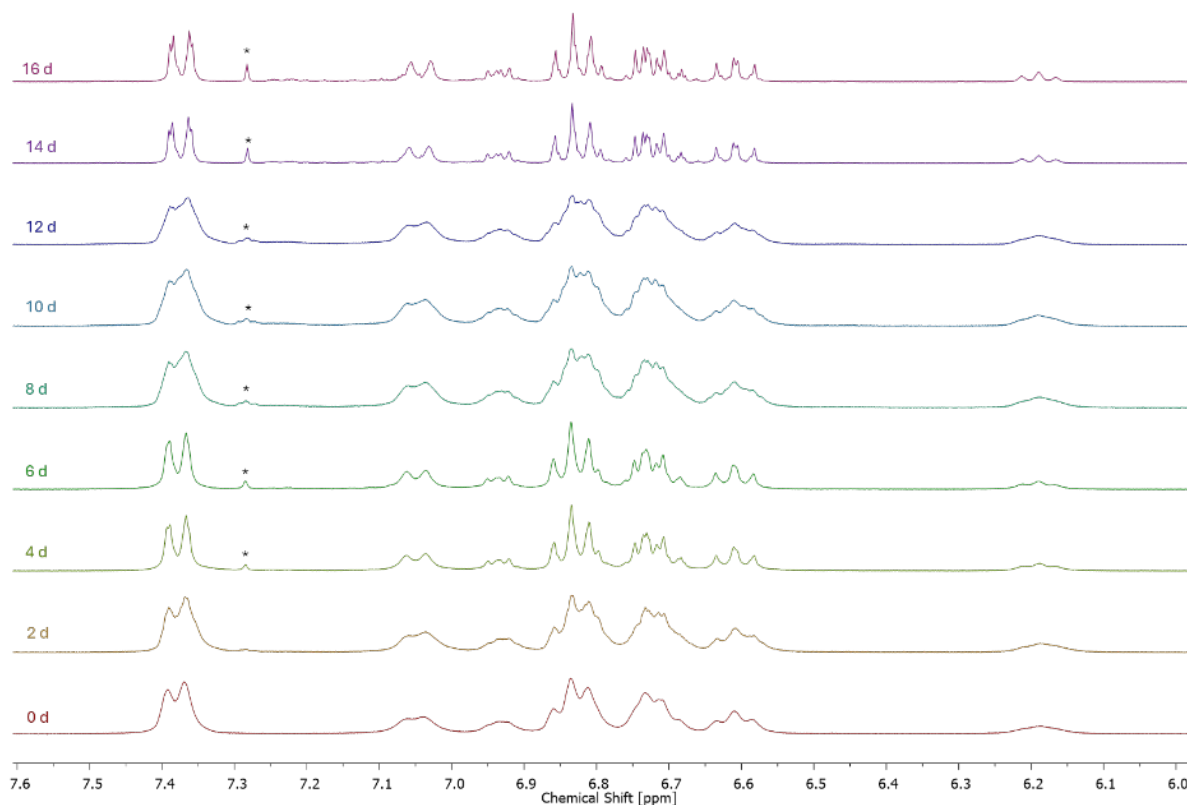

**Fig. S112** Stacked hydrolysis study  $^1\text{H}$  NMR spectra (aromatic region) of compound **8Ph[TBA]** in a 1:1 mixture of  $\text{THF-}d_8$  and  $\text{H}_2\text{O}$  open to the atmosphere after over a time period of 16 d at ambient temperature. The marked impurity corresponds to a  $\text{C}_6\text{H}_6$  impurity with increasing intensity as **8Ph[TBA]** slowly precipitates.

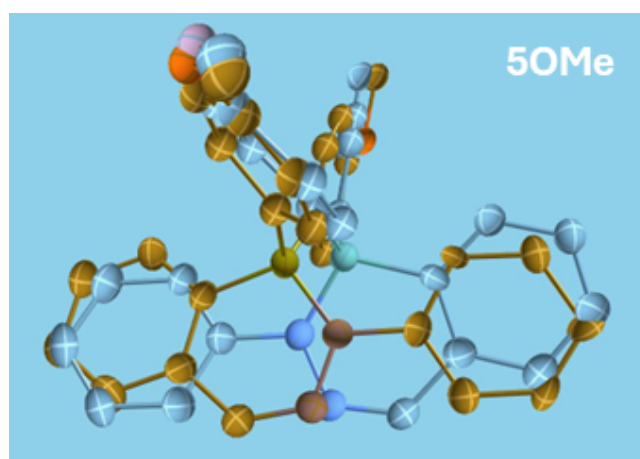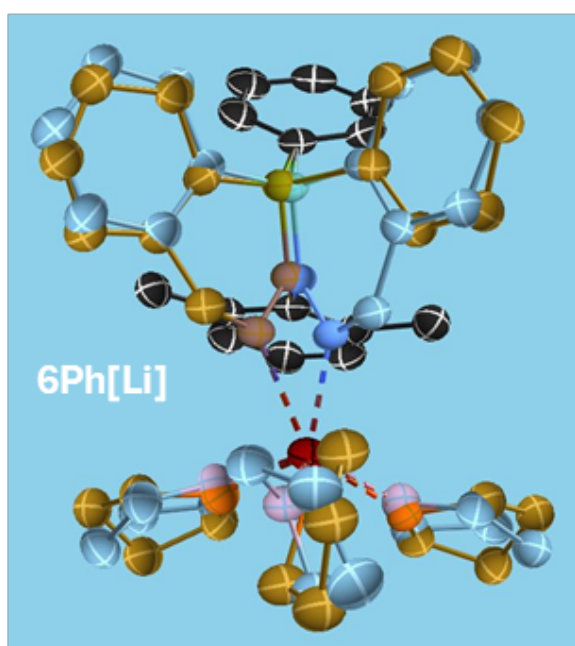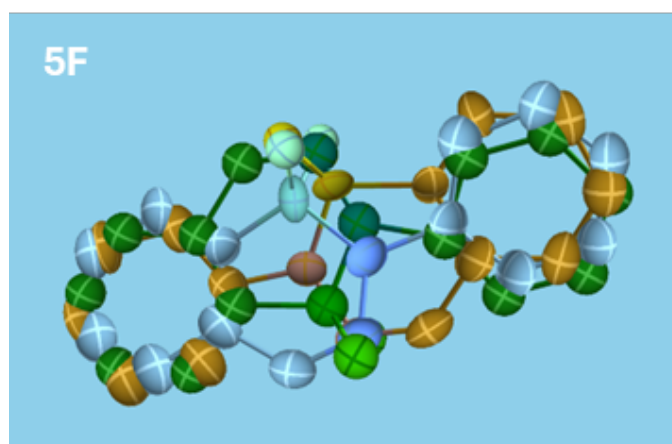

**Fig. S113**

Examples **5OMe[Li]** (counter cation omitted for clarity), **6Ph[Li]** and **5F[TBA]** (counter cation omitted for clarity) showcasing different kinds of 2- or 3-fold whole molecule disorders, that generally prevent in-depth XRD discussion for these and other derivatives (ShelXle screenshot).

### 3 Spectroscopic details

**Table S3** Photophysical data of the compounds **1R-4R** in THF.

| Compound     | $\lambda_{\text{abs, max}}$ [nm] |
|--------------|----------------------------------|
| <b>1OH</b>   | 307                              |
| <b>1OTMS</b> | 304                              |
| <b>2OH</b>   | 304                              |
| <b>2OTMS</b> | 305                              |
| <b>3OH</b>   | 306                              |
| <b>3OTMS</b> | 301                              |
| <b>3Ph</b>   | 300                              |
| <b>4OH</b>   | 306                              |
| <b>4OTMS</b> | 300                              |

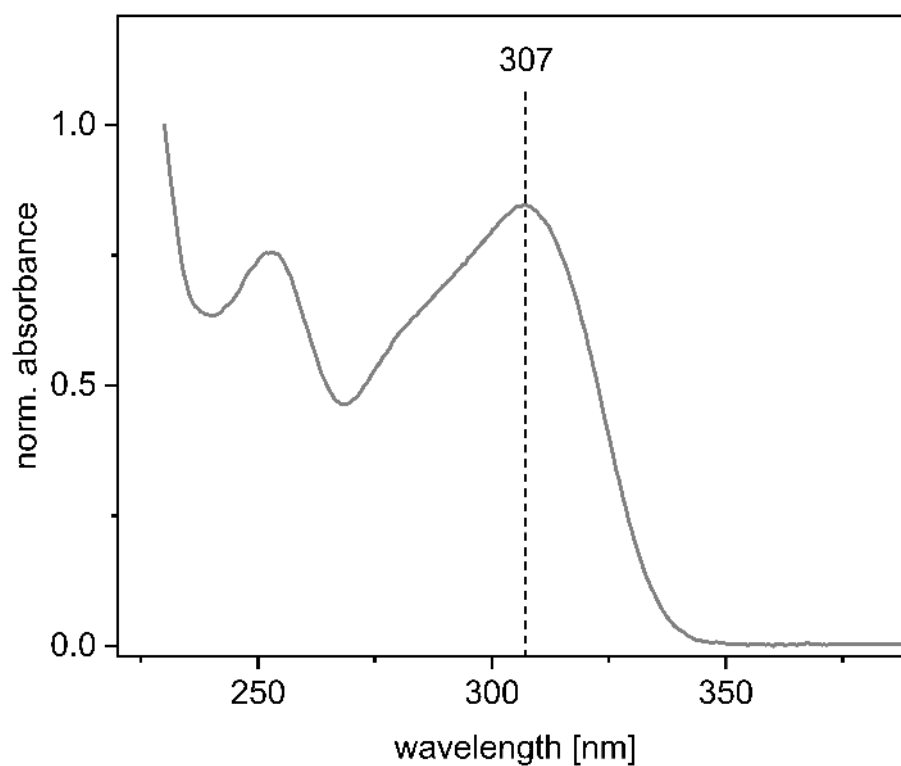

**Fig. S114** Normalized absorption spectrum of **1OH** in THF.

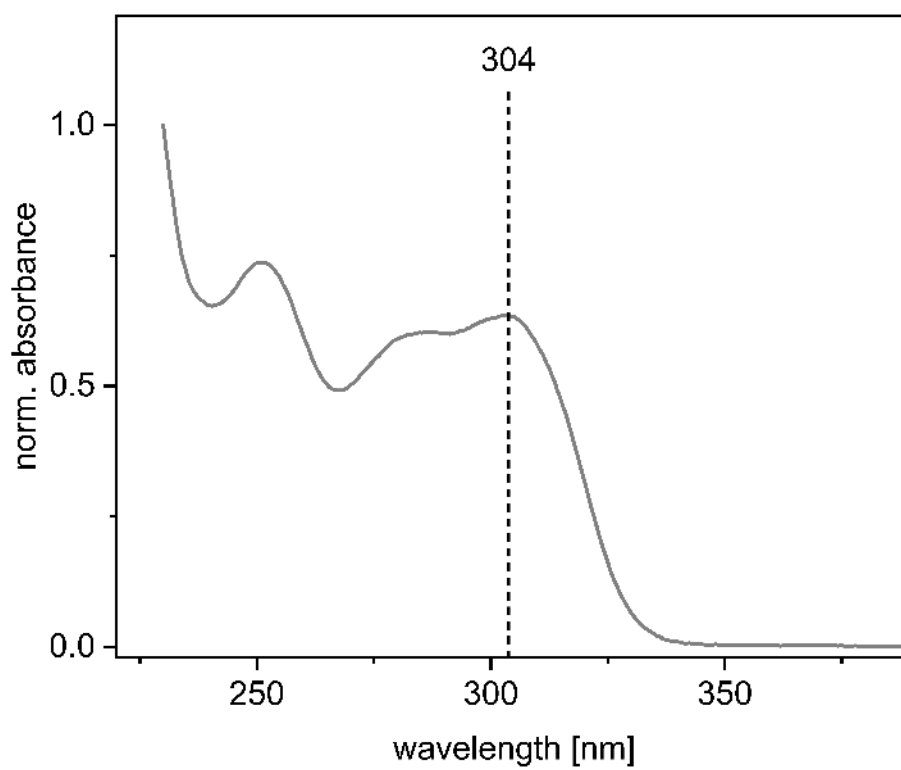

**Fig. S115** Normalized absorption spectrum of **1OTMS** in THF.

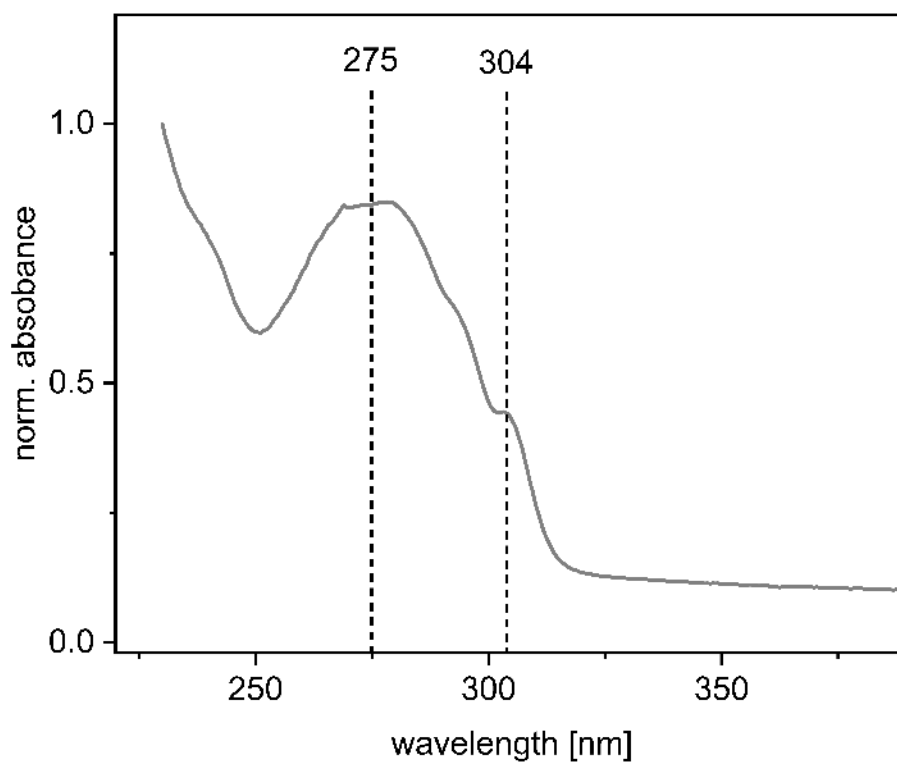

**Fig. S116** Normalized absorption spectrum of **2OH** in THF.

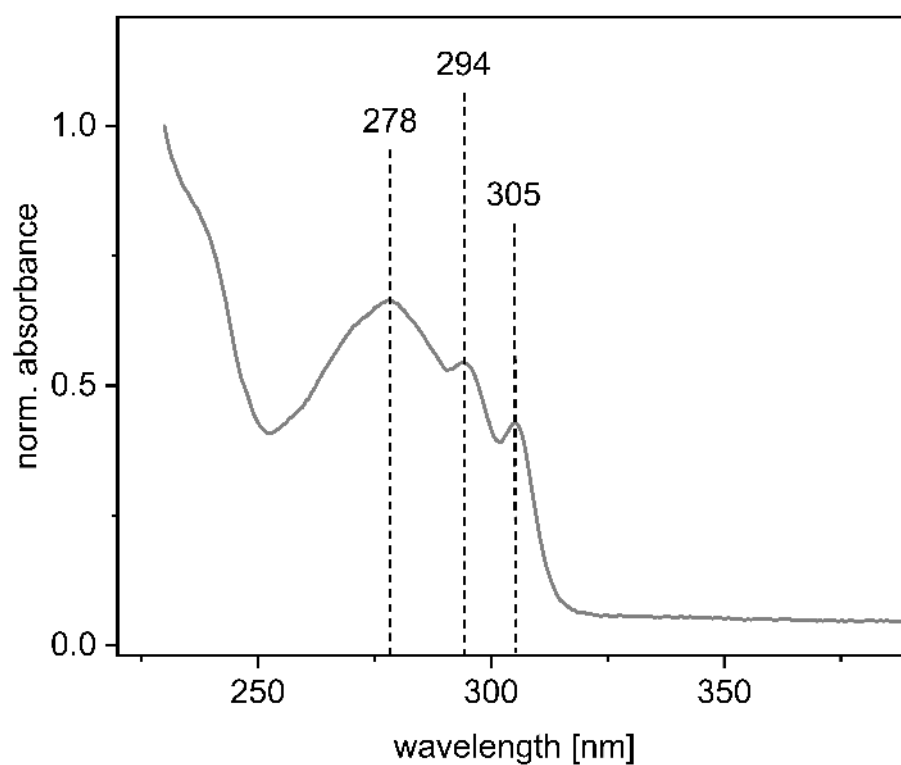

**Fig. S117** Normalized absorption spectrum of **2OTMS** in THF.

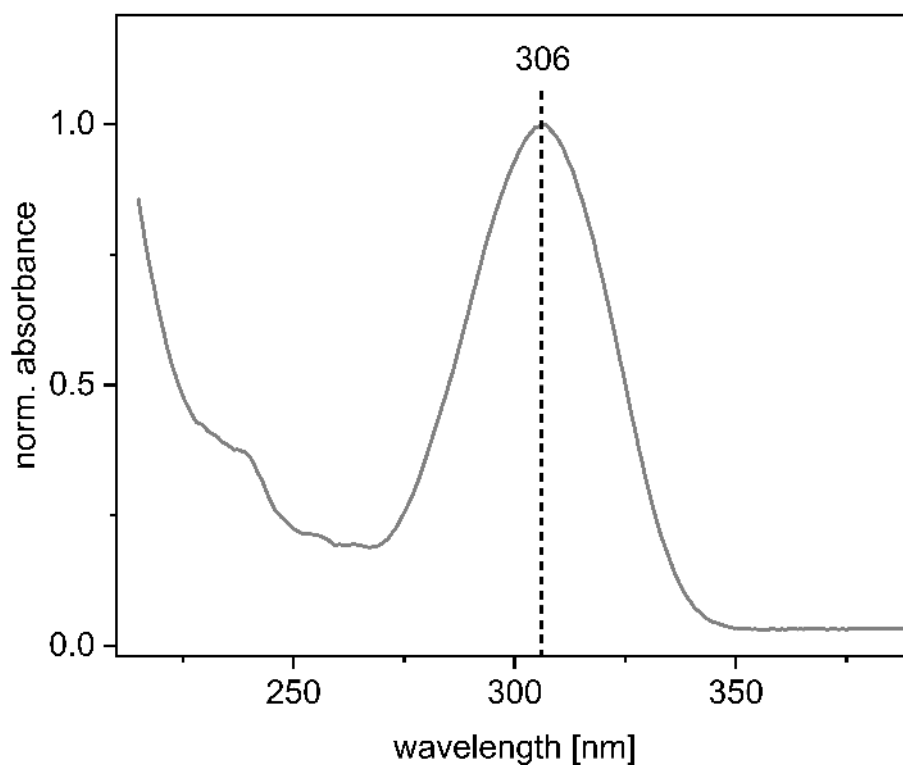

**Fig. S118** Normalized absorption spectrum of **3OH** in THF.

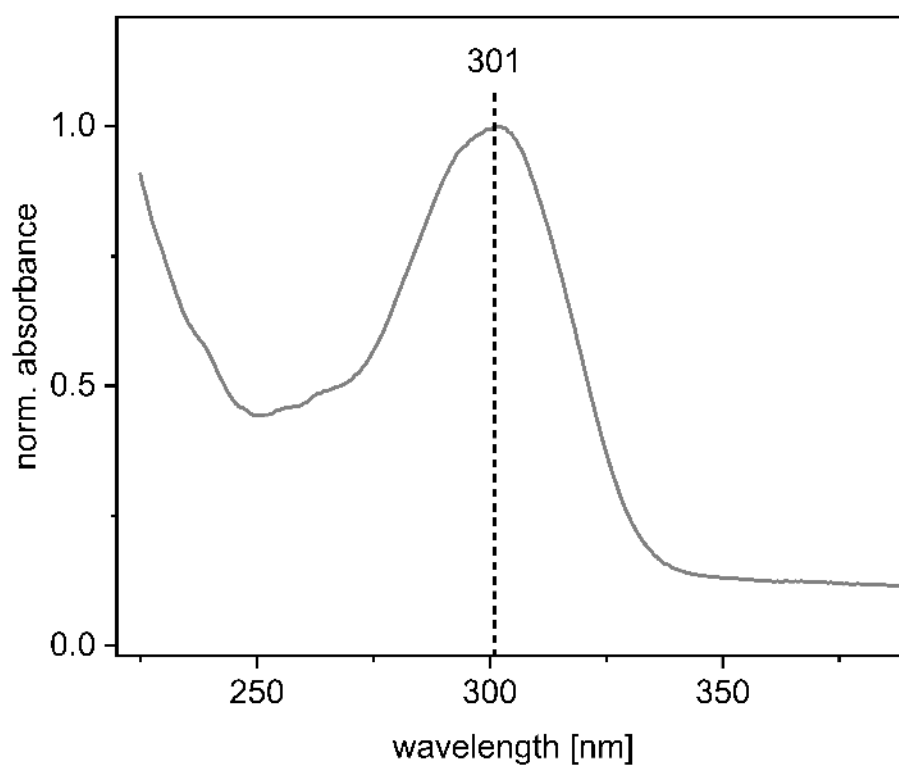

**Fig. S119** Normalized absorption spectrum of **3OTMS** in THF.

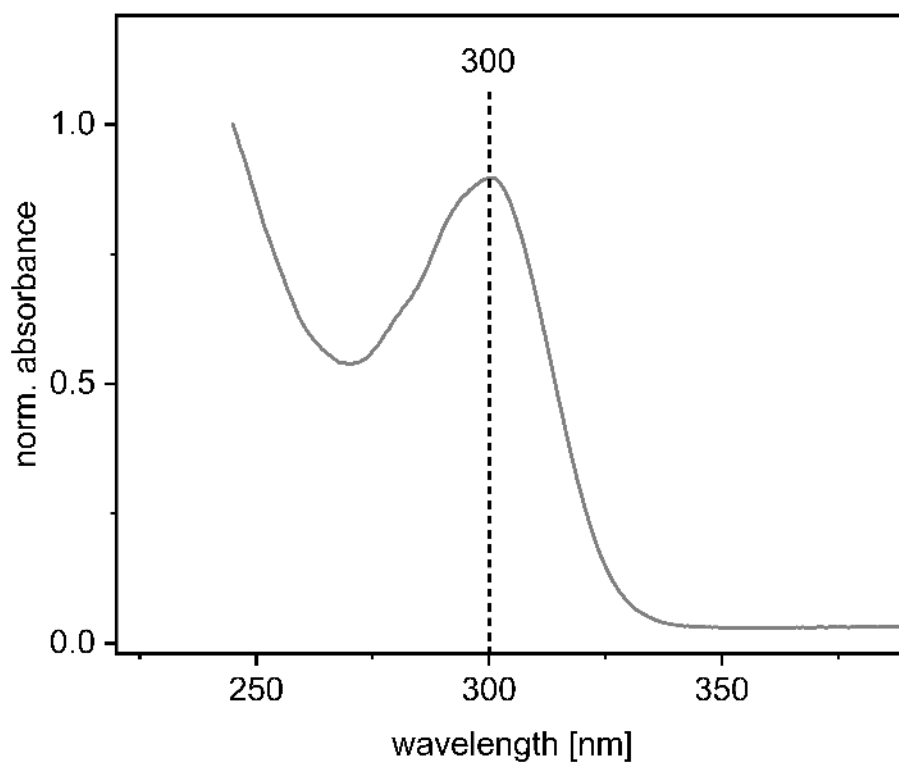

**Fig. S120** Normalized absorption spectrum of **3Ph** in THF.

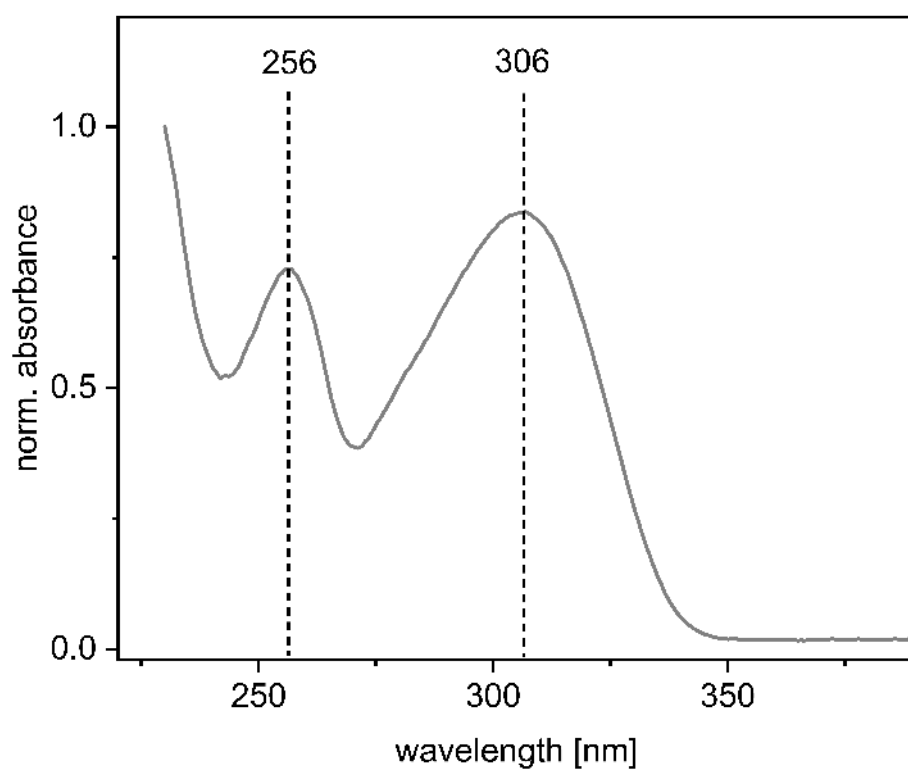

**Fig. S121** Normalized absorption spectrum of **4OH** in THF.

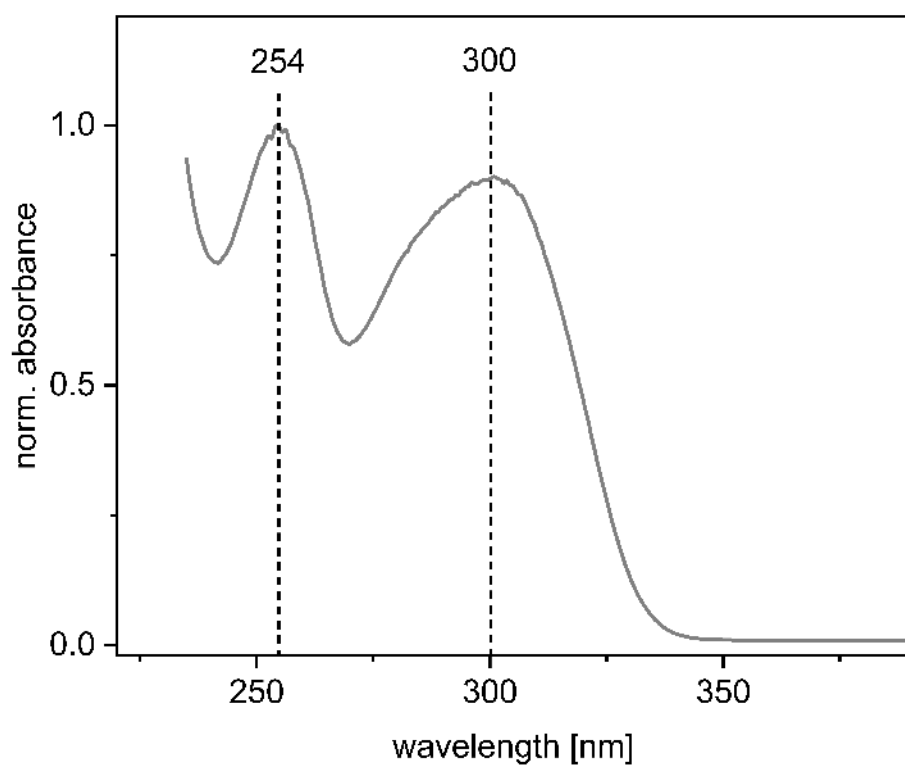

**Fig. S122** Normalized absorption spectrum of **4OTMS** in THF.



**Table S4** Photophysical data of the compounds **5R-8R** in THF and as PMMA film.

| Compound                   | $\lambda_{\text{abs, max}}$<br>[nm] | $\lambda_{\text{abs, max}}^{[a]}$<br>[nm] | $\lambda_{\text{em, max}}$<br>[nm] | $\lambda_{\text{em, max}}^{[a]}$<br>[nm] | $\Phi_{\text{fl}}^{[b]}$<br>[%] | $\Phi_{\text{fl}}^{[a; b]}$<br>[%] | $\tau^{\text{fl}} [a]$<br>[ns] |
|----------------------------|-------------------------------------|-------------------------------------------|------------------------------------|------------------------------------------|---------------------------------|------------------------------------|--------------------------------|
| <b>5Ph[Li]</b>             | 398                                 | 396                                       | 460                                | 455                                      | 18                              | 30                                 | 1.70; 2.57 (74%)               |
| <b>5Ph[TBA]</b>            | 398                                 | 399                                       | 459                                | 463                                      | 19                              | 27                                 | 1.63; 2.57 (77%)               |
| <b>5F[TBA]</b>             | 355                                 | 354                                       | 428                                | 427                                      | -                               | 37                                 | -                              |
| <b>5Me[Li]</b>             | 404                                 | 415                                       | 471                                | 471                                      | 2                               | 27                                 | -                              |
| <b>5Thio[Li]</b>           | 388                                 | 384                                       | 450                                | 448                                      | 19                              | 38                                 | 1.03 (74%); 1.59               |
| <b>5CF<sub>3</sub>[Li]</b> | 395                                 | 391                                       | 453                                | 445                                      | 19                              | 42                                 | -                              |
| <b>5OMe[Li]</b>            | 398                                 | 403                                       | 457                                | 457                                      | 18                              | 25                                 | 1.88 (71%); 3.23               |
| <b>5Bip[Li]</b>            | 404                                 | 406                                       | 467                                | 457                                      | 18                              | 32                                 | 1.62; 2.91 (89%)               |
| <b>5Cbz[Li]</b>            | 397                                 | 395                                       | 456                                | 451                                      | 12                              | 34                                 | 1.65; 2.34 (57%)               |
| <b>5Ph[Me]</b>             | 415                                 | -                                         | -                                  | -                                        | -                               | -                                  | -                              |
| <b>6Ph[Li]</b>             | 390                                 | 387                                       | 501                                | 483                                      | 7                               | 3                                  | 2.16; 3.61 (72%)               |
| <b>7Ph[Li]</b>             | 410                                 | 410                                       | 465                                | 477                                      | 63                              | 28                                 | 5.63                           |
| <b>8Ph[Li]</b>             | 403                                 | 402                                       | 463                                | 463                                      | 26                              | 5                                  | 2.96                           |
| <b>8Ph[TBA]</b>            | 403                                 | 404                                       | 464                                | 474                                      | 26                              | 9                                  | 2.92 (95%); 6.81               |

[a] PMMA film [b] Fluorescence quantum yields, determined using an integration sphere.

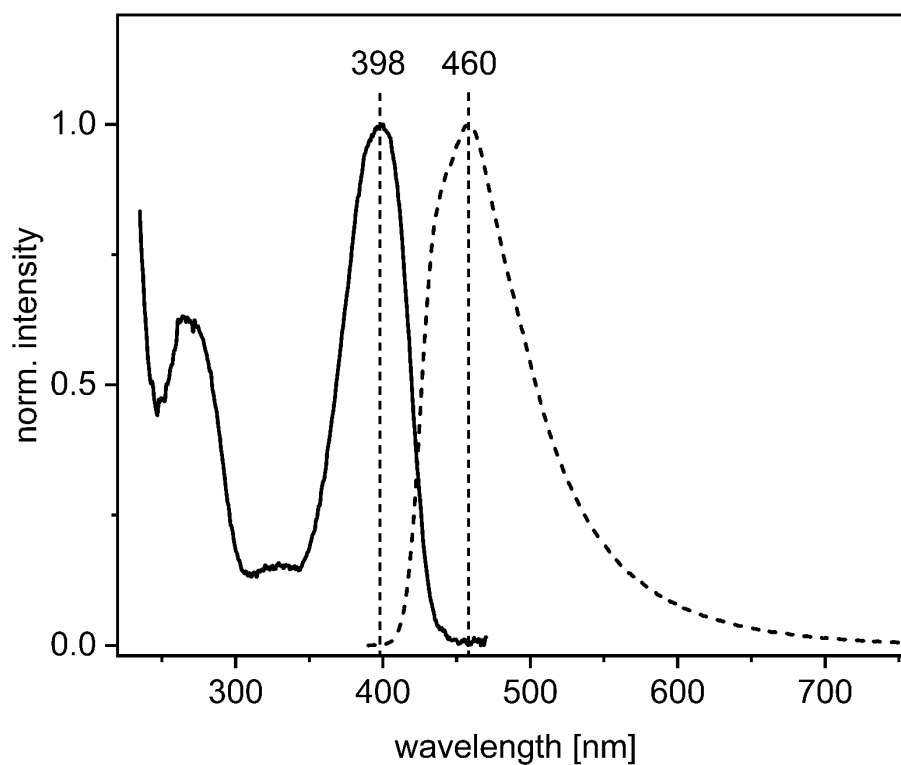**Fig. S123** Normalized absorption and emission spectra of **5Ph[Li]** in THF.

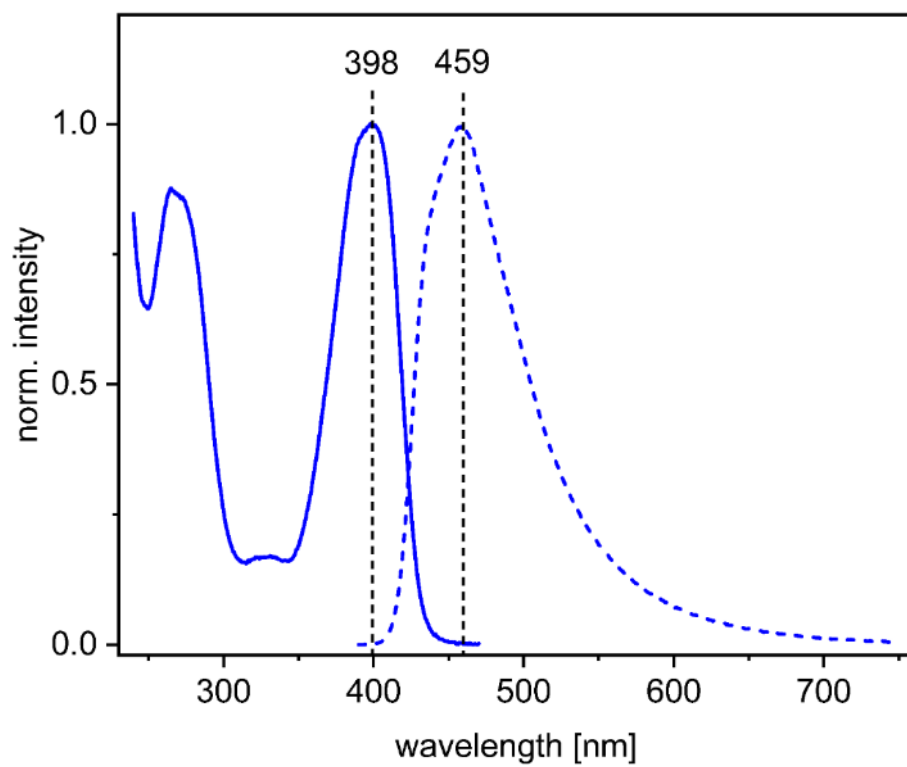

**Fig. S124** Normalized absorption and emission spectra of **5Ph[TBA]** in THF.

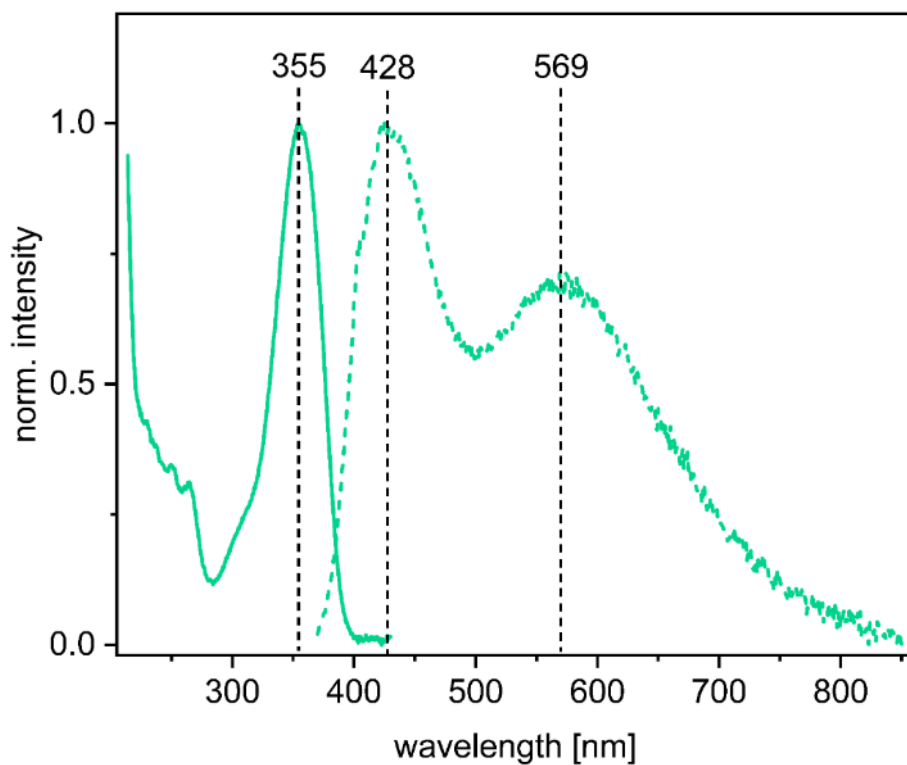

**Fig. S125** Normalized absorption and emission spectra of **5F[TBA]** in THF.

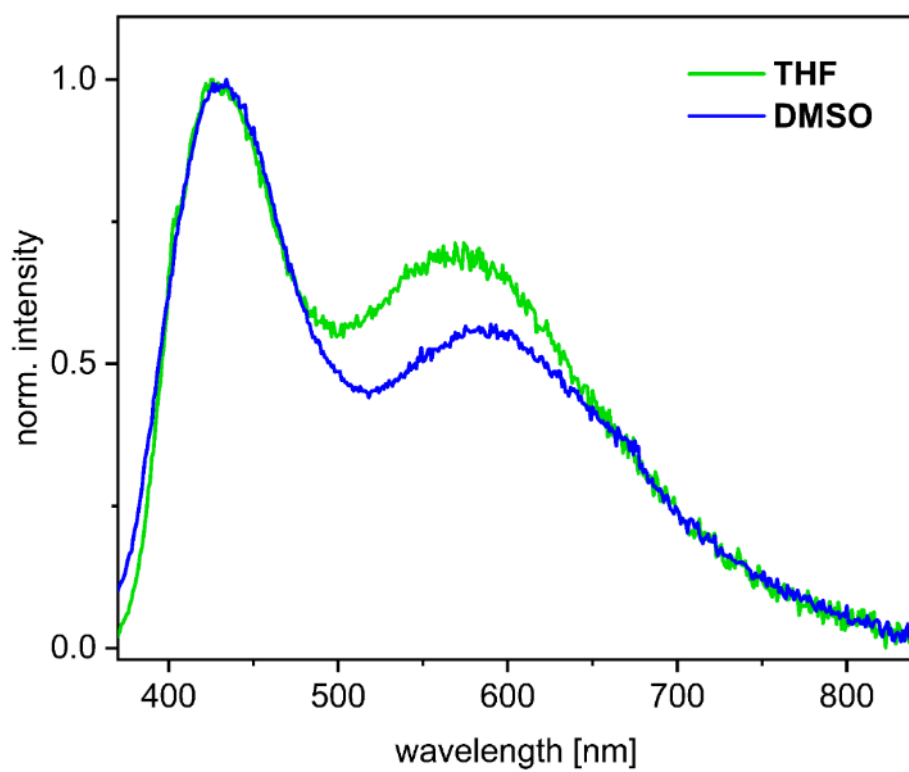

**Fig. S126**

Normalized emission spectra of **5F[TBA]** in THF and DMSO.

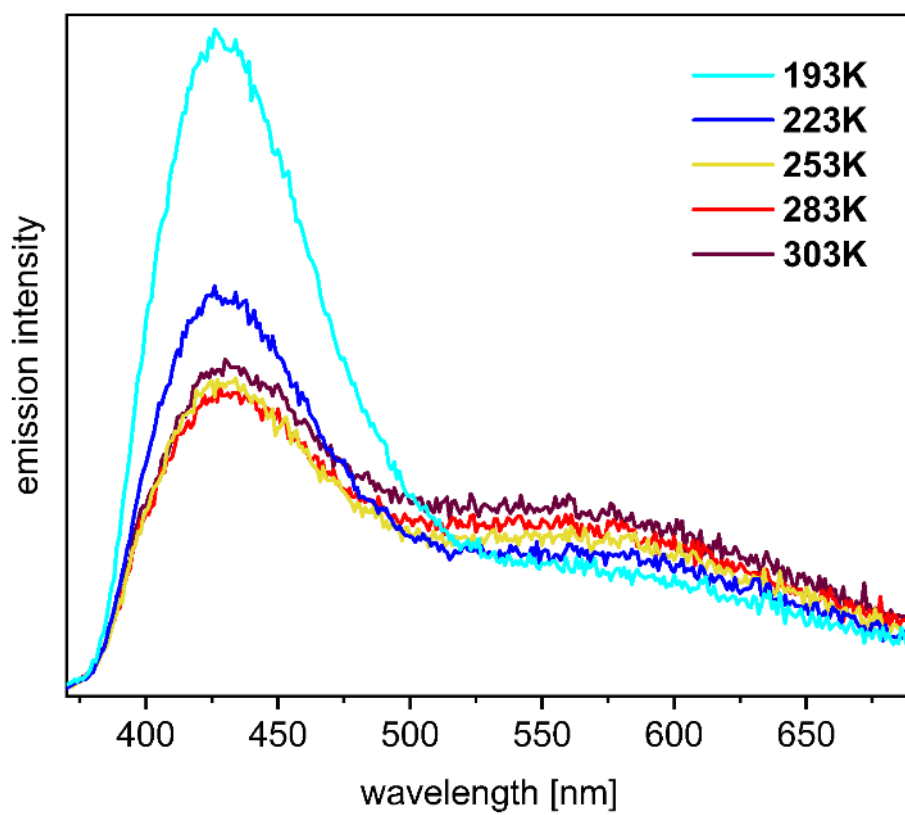

**Fig. S127**

Emission spectra of **5F[TBA]** in 2-MeTHF by variable-temperature.

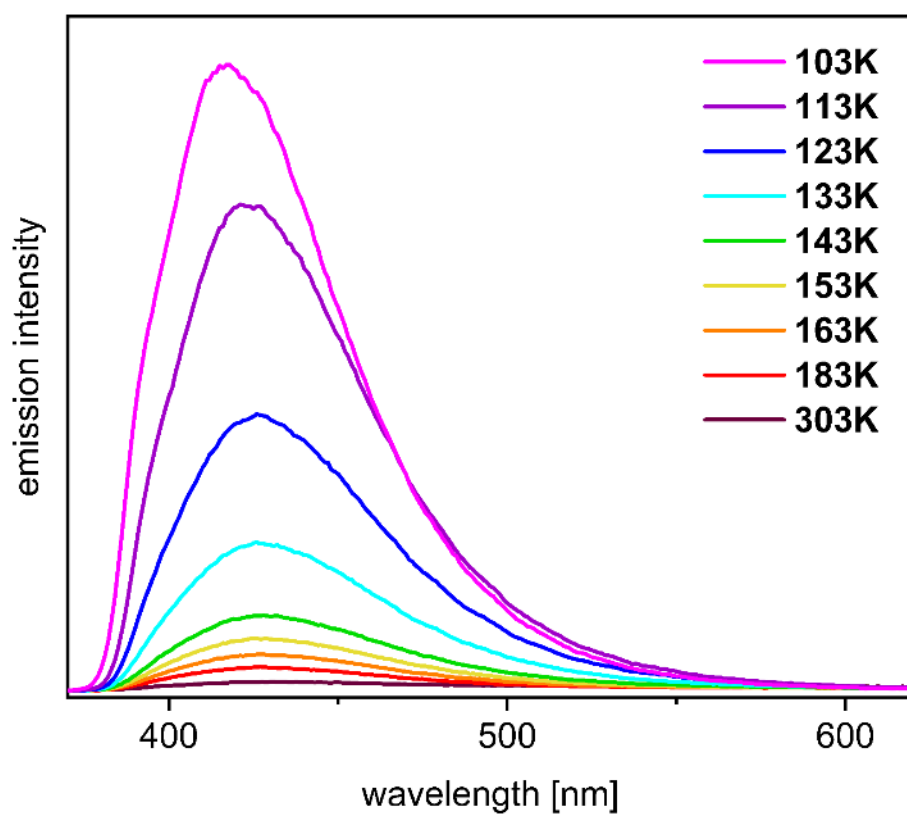

**Fig. S128**

Emission spectra of **5F[TBA]** in 2-MeTHF by variable-temperature.

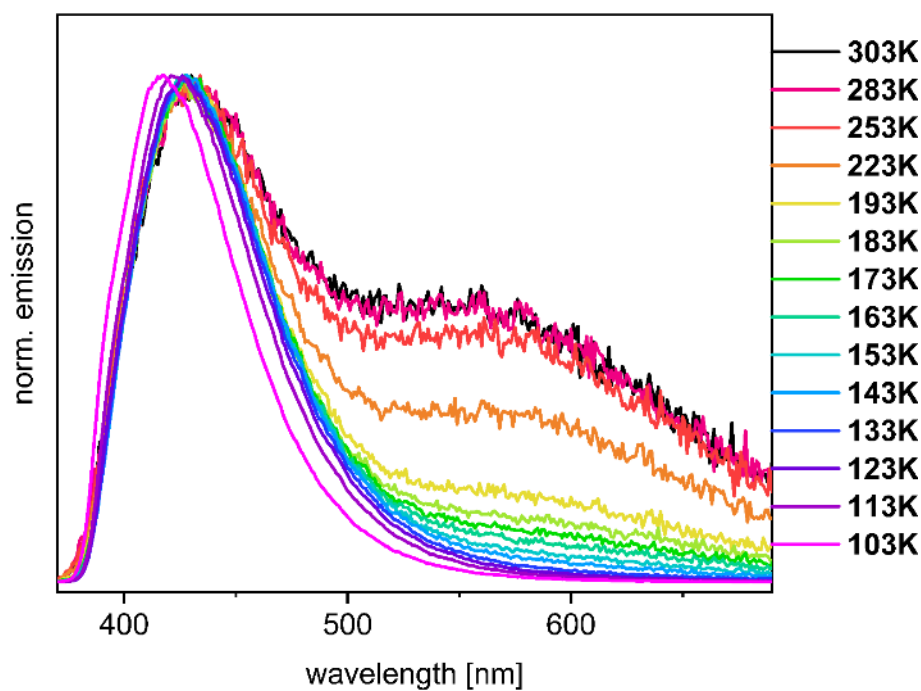

**Fig. S129**

Normalized emission spectra of **5F[TBA]** in 2-MeTHF by variable-temperature.

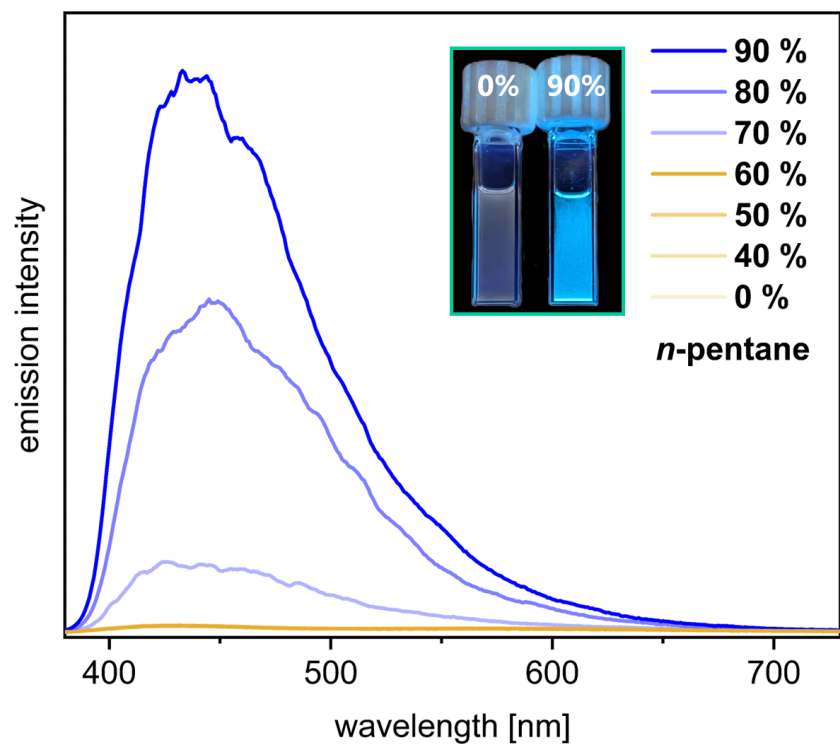

**Fig. S130** Emission spectra of **5F[TBA]** in THF/*n*-pentane mixtures (conc.  $5 \times 10^{-5}$  M). Inset: Cuvettes of the sample with 0% (left) and 90% (right) *n*-pentane fraction under UV light.

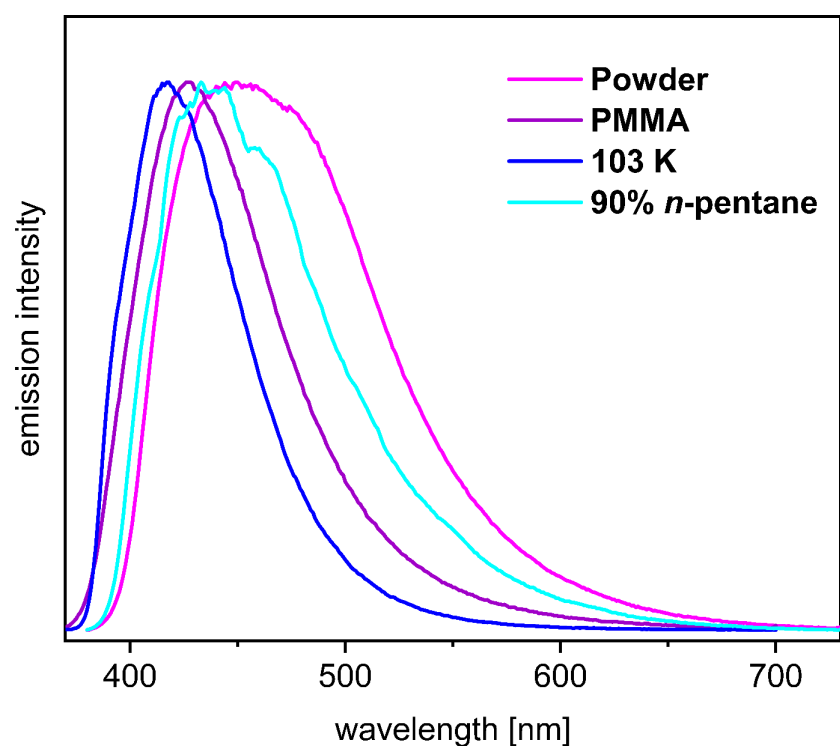

**Fig. S131** Emission spectra of **5F[TBA]** in a rigid environment as powder, PMMA-film, at 103 K in Me-THF and in a 90% *n*-pentane/ 10% THF mixture (conc.  $5 \times 10^{-5}$  M).

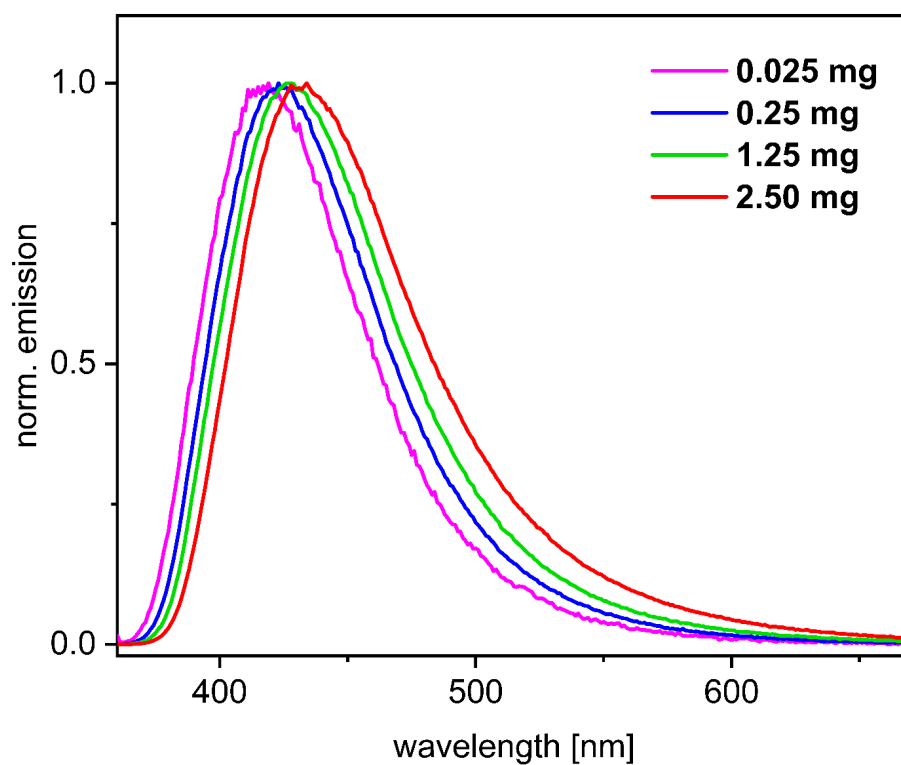

**Fig. S132**

Emission spectra of **5F[TBA]** as PMMA-film with different contents of DABate.

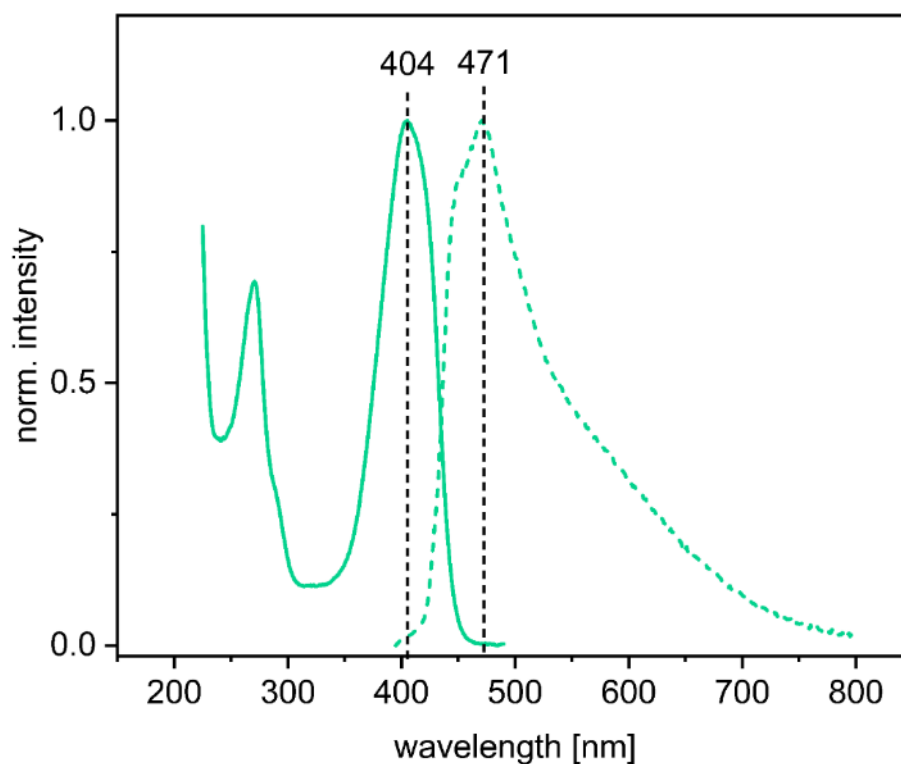

**Fig. S133**

Normalized absorption and emission spectra of **5Me[Li]** in THF.

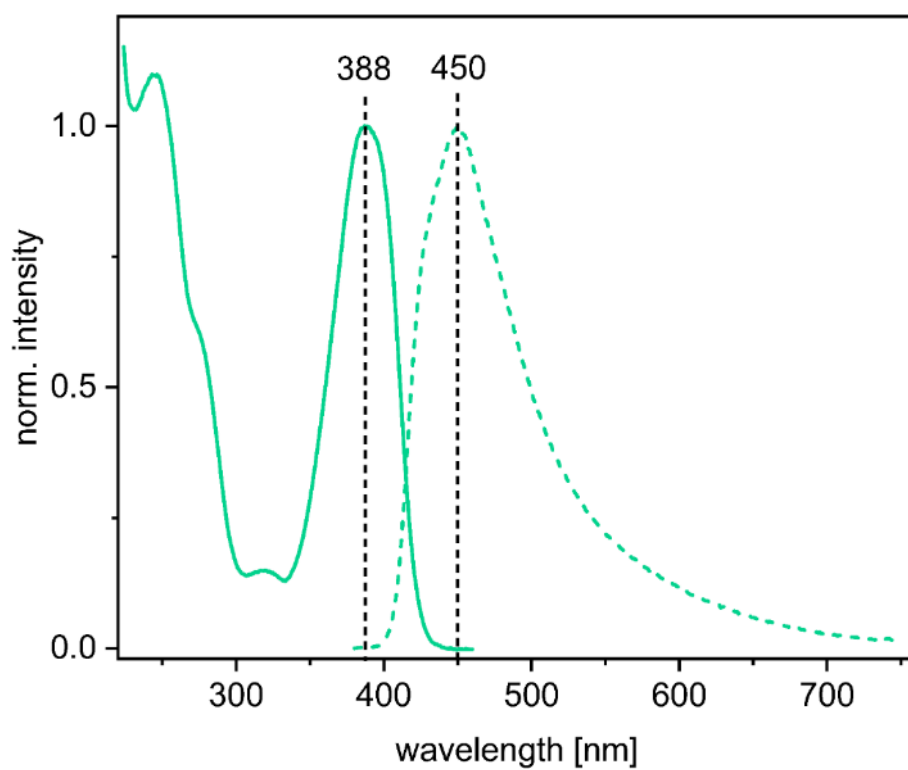

**Fig. S134** Normalized absorption and emission spectra of **5Thio[Li]** in THF.

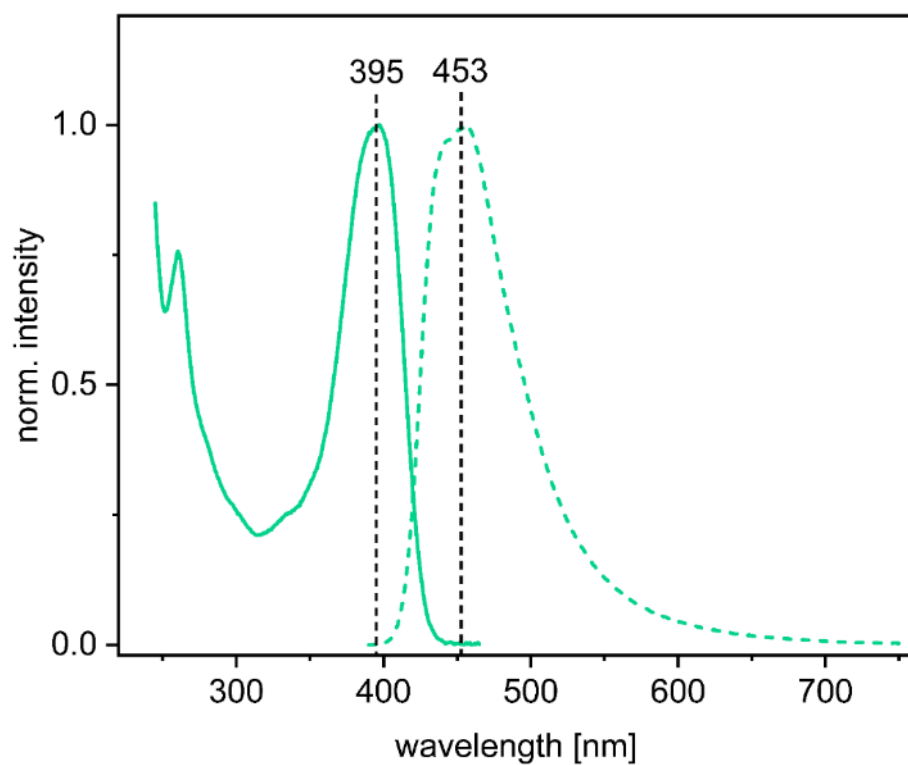

**Fig. S135** Normalized absorption and emission spectra of **5CF<sub>3</sub>[Li]** in THF.

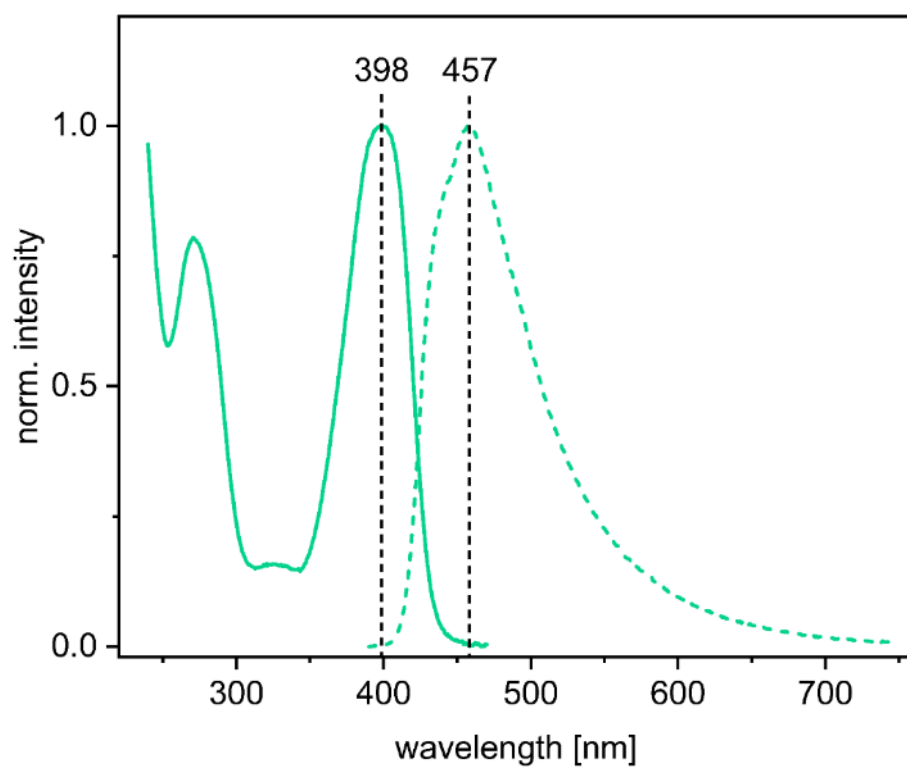

**Fig. S136** Normalized absorption and emission spectra of **5OMe[Li]** in THF.

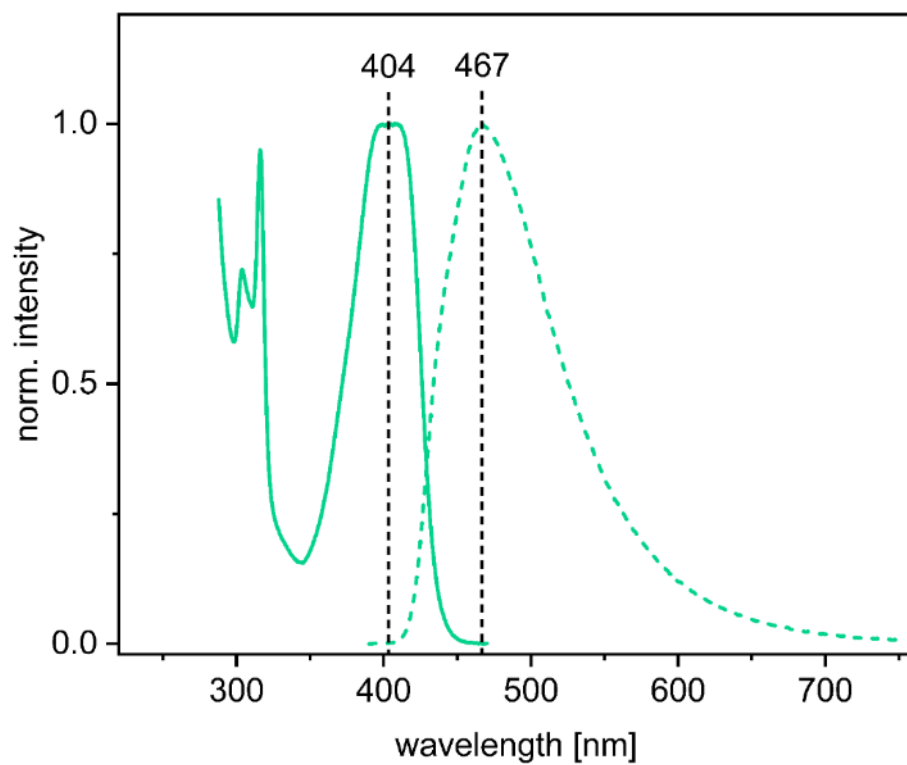

**Fig. S137** Normalized absorption and emission spectra of **5Biph[Li]** in THF.



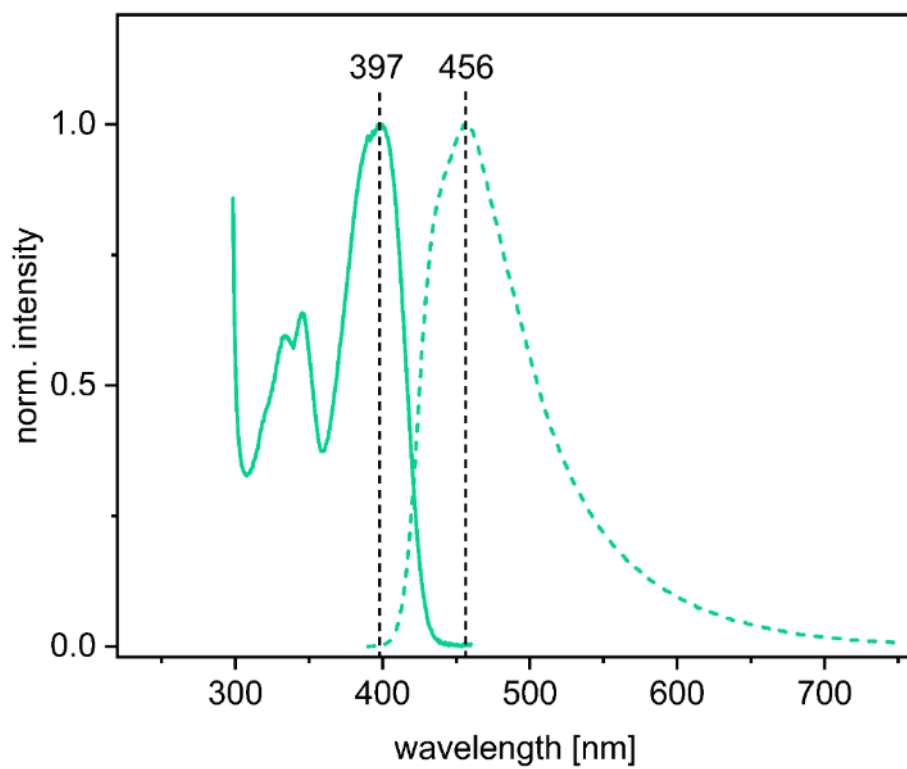

**Fig. S138** Normalized absorption and emission spectra of **5Cbz[Li]** in THF.

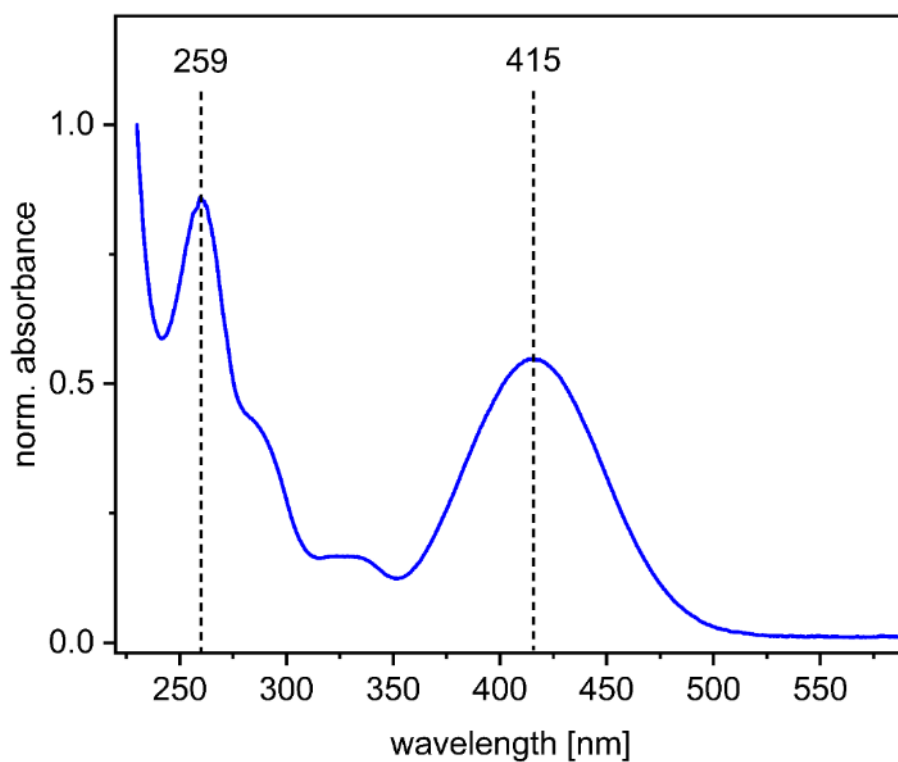

**Fig. S139** Normalized absorption spectrum of **5Ph[Me]** in THF.

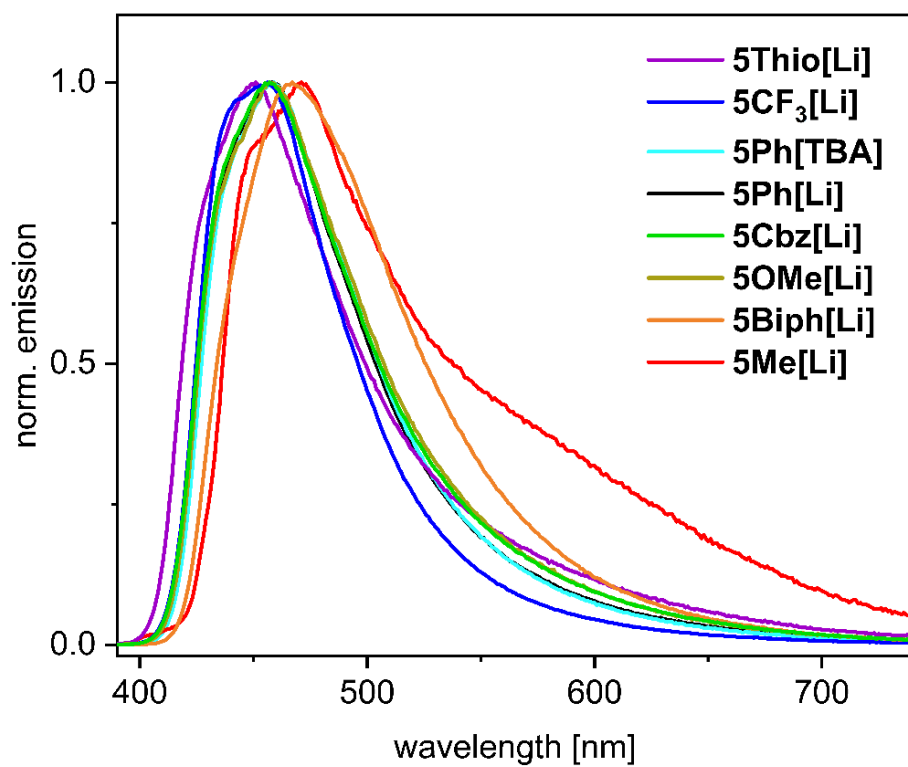

**Fig. S140**

Normalized emission spectra of the **5R** compounds in THF.

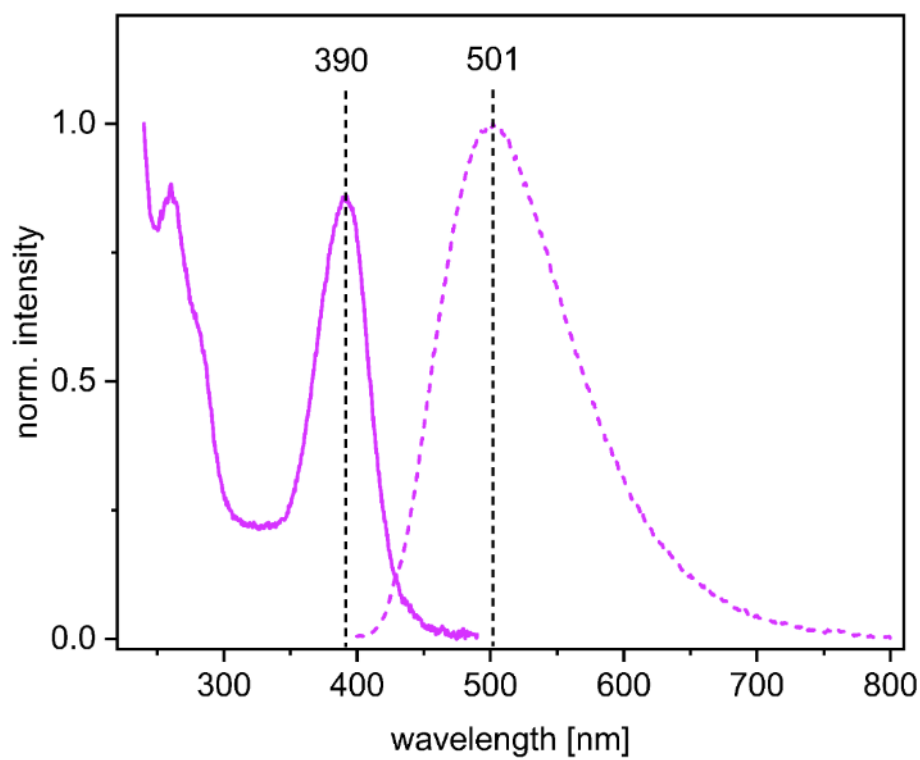

**Fig. S141**

Normalized absorption and emission spectra of **6Ph[Li]** in THF.

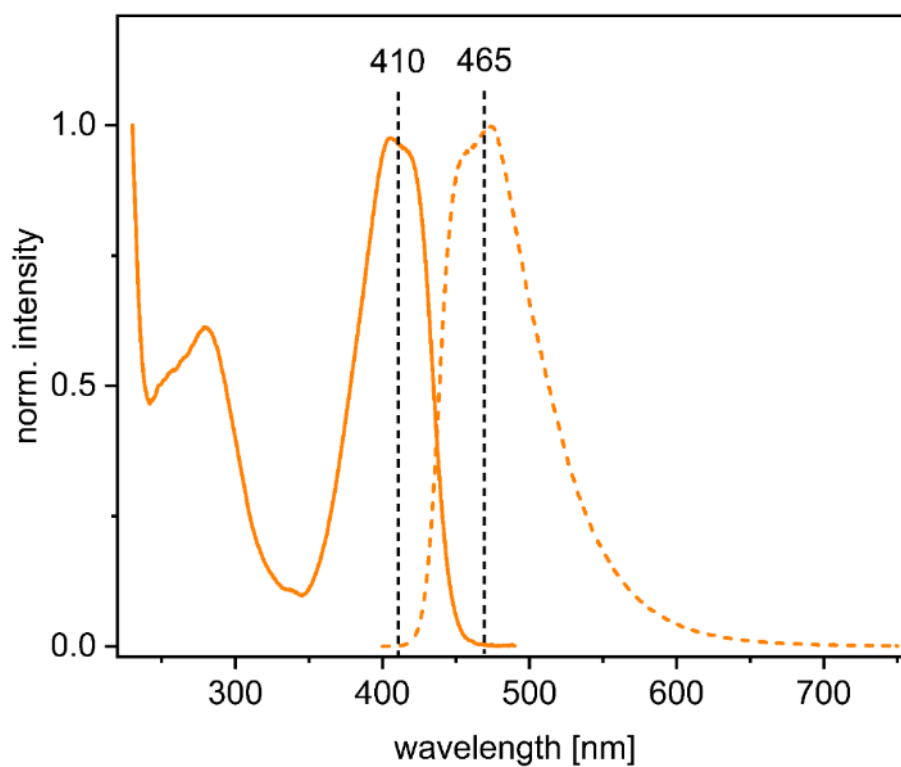

**Fig. S142**

Normalized absorption and emission spectra of **7Ph[Li]** in THF.

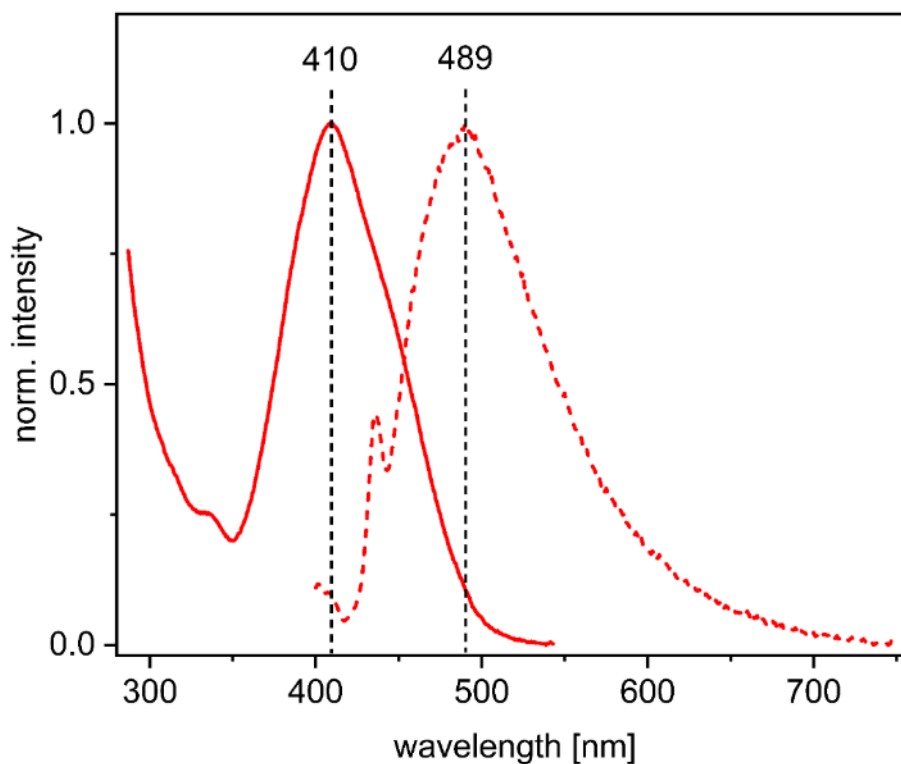

**Fig. S143**

Normalized absorption and emission spectra of **8Ph[Li]** in THF.

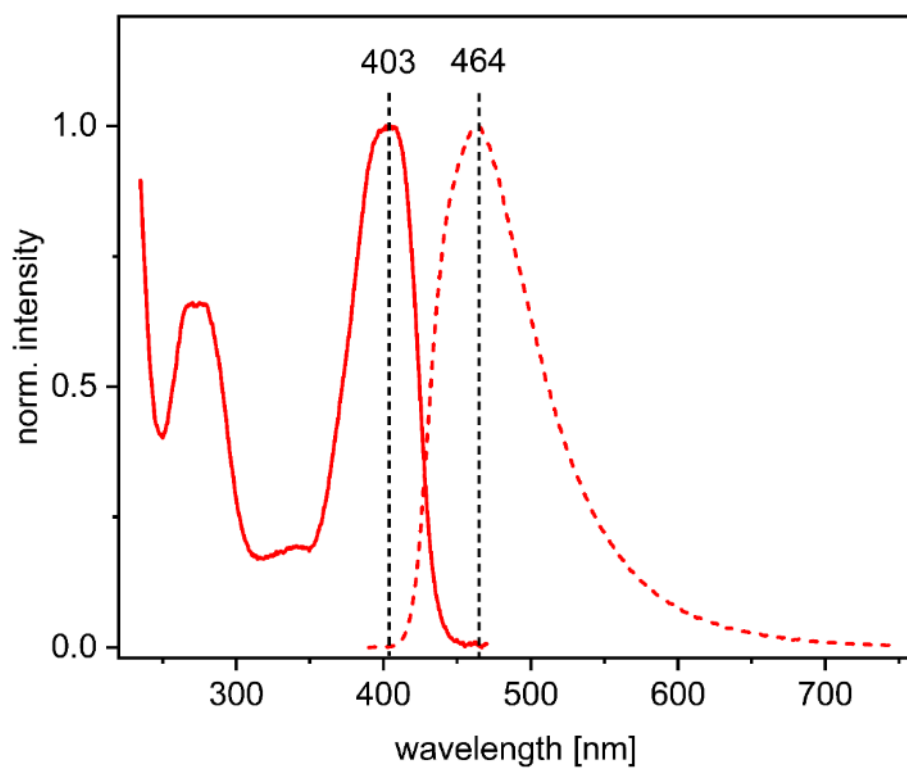

**Fig. S144** Normalized absorption and emission spectra of **8Ph[TBA]** in THF.

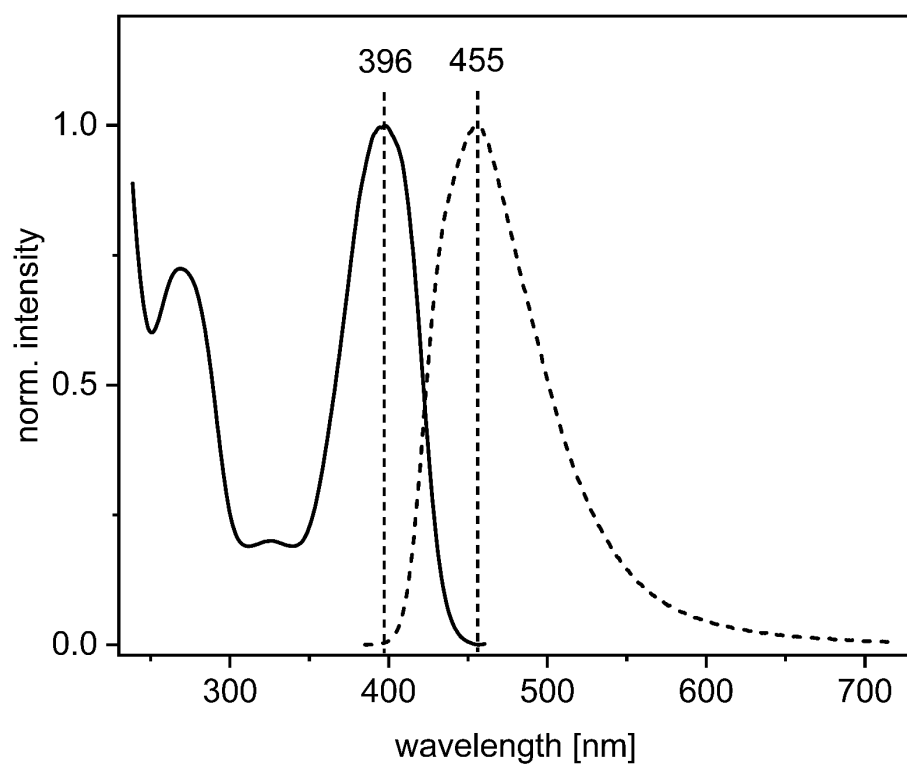

**Fig. S145** Normalized absorption and emission spectra of **5Ph[Li]** as PMMA film.

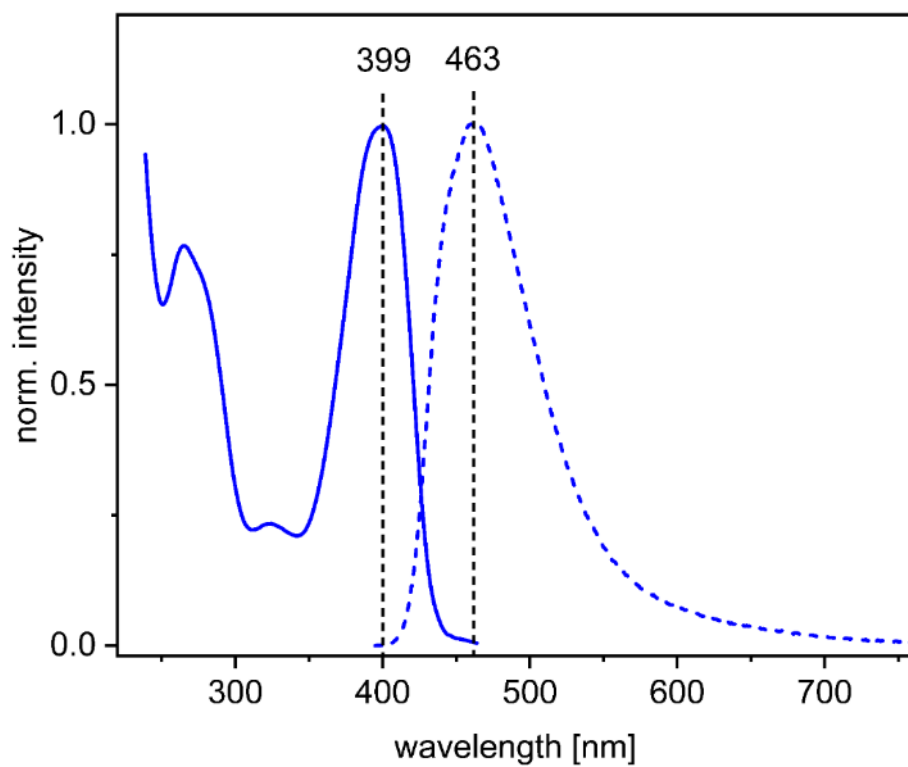

**Fig. S146** Normalized absorption and emission spectra of **5Ph[TBA]** as PMMA film.

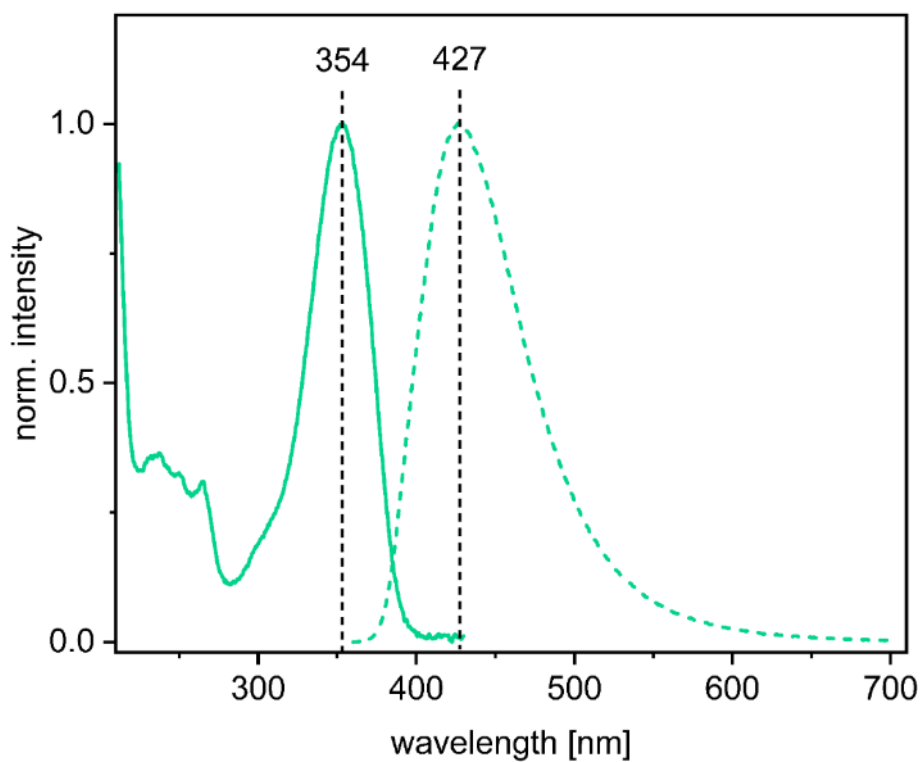

**Fig. S147** Normalized absorption and emission spectra of **5F[TBA]** as PMMA film.

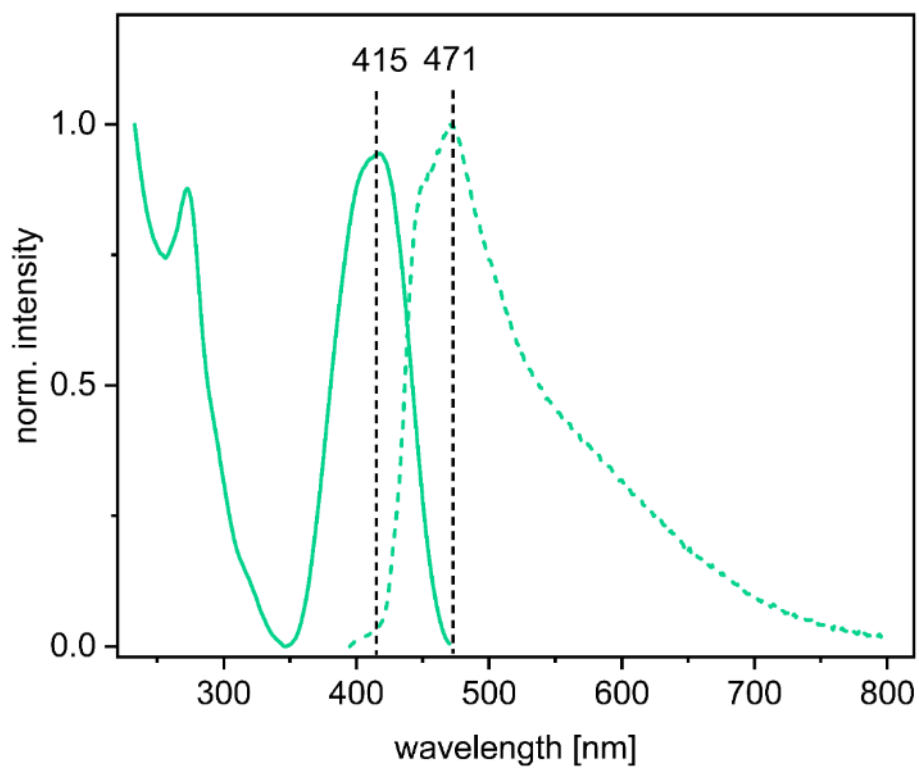

**Fig. S148** Normalized absorption and emission spectra of **5Me[Li]** as PMMA film.

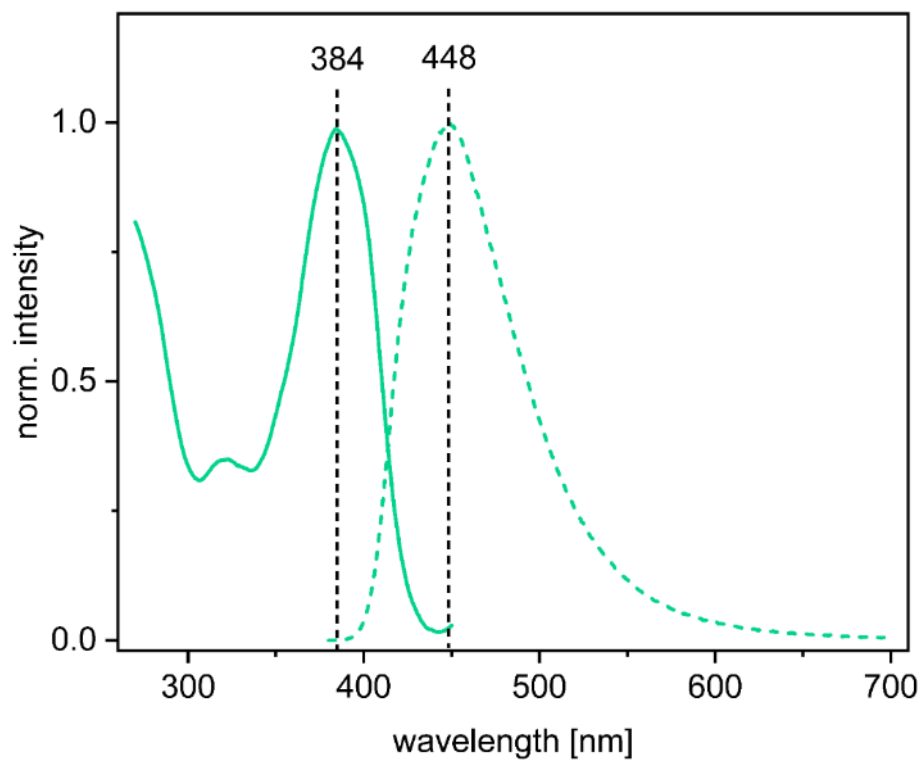

**Fig. S149** Normalized absorption and emission spectra of **5Thio[Li]** as PMMA film.

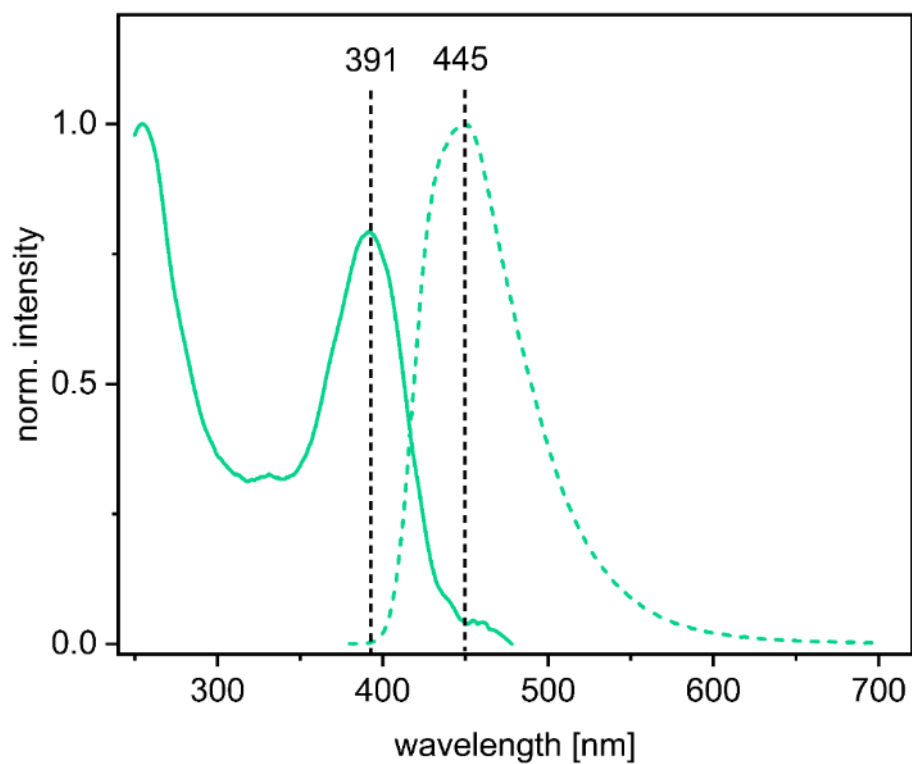

**Fig. S150** Normalized absorption and emission spectra of **5CF<sub>3</sub>[Li]** as PMMA film.

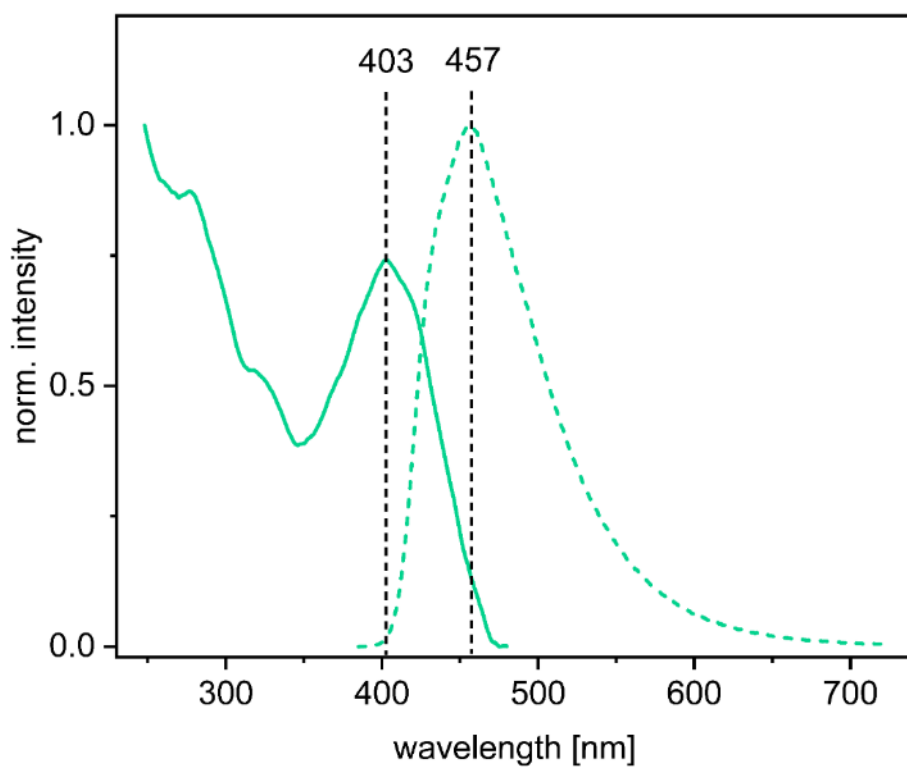

**Fig. S151** Normalized absorption and emission spectra of **5OMe[Li]** as PMMA film.

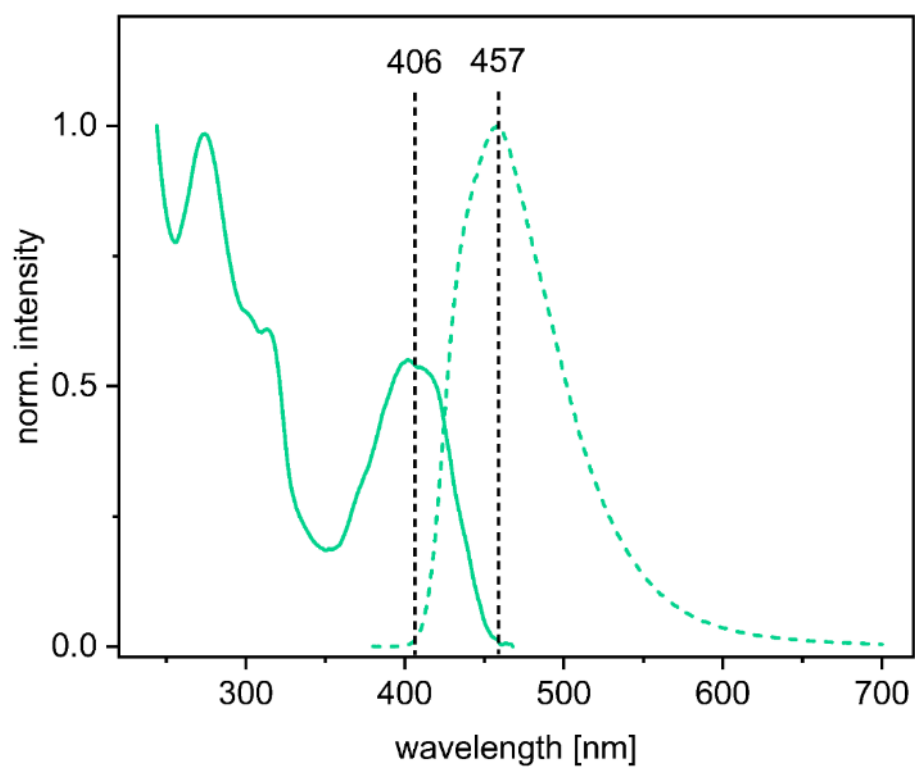

**Fig. S152** Normalized absorption and emission spectra of **5Biph[Li]** as PMMA film.

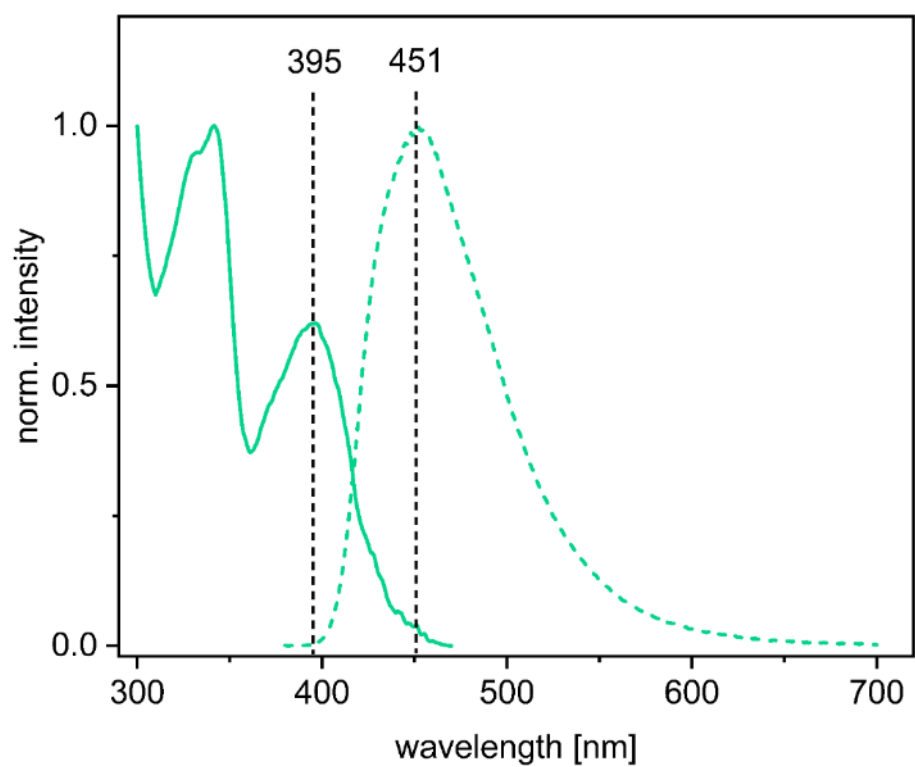

**Fig. S153** Normalized absorption and emission spectra of **5Cbz[Li]** as PMMA film.



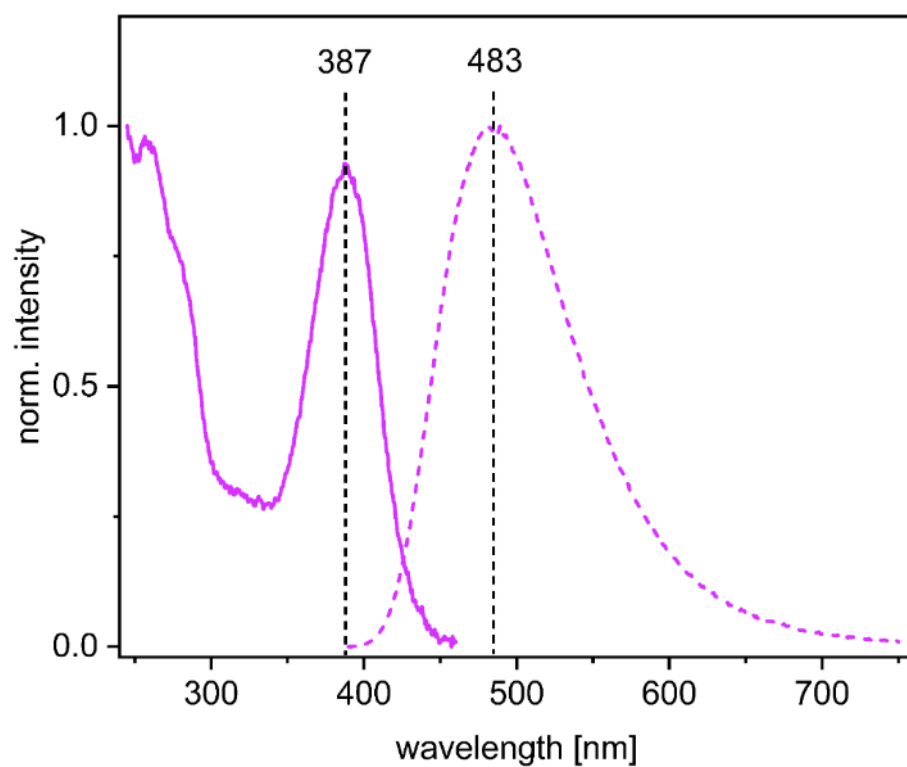

**Fig. S154**

Normalized absorption and emission spectra of **6Ph[Li]** as PMMA film.

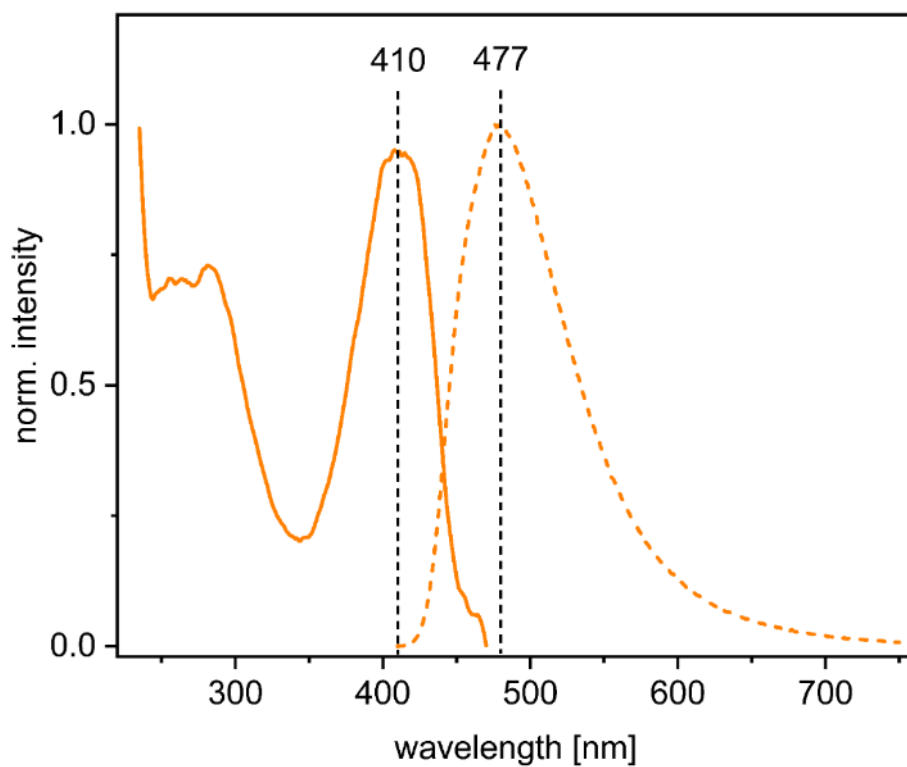

**Fig. S155**

Normalized absorption and emission spectra of **7Ph[Li]** as PMMA film.

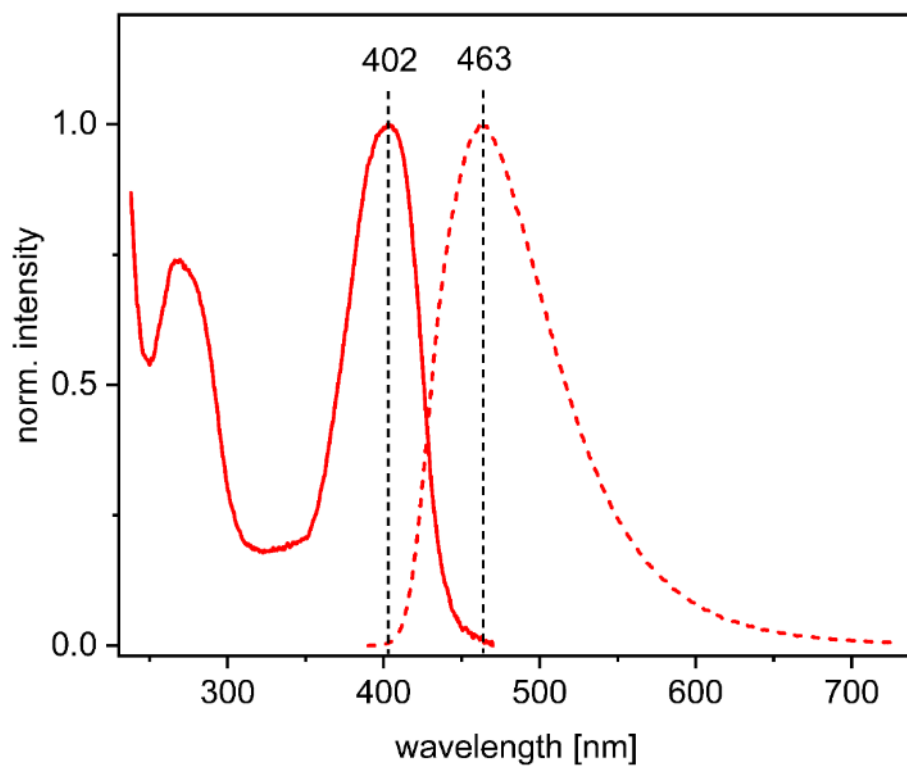

**Fig. S156**

Normalized absorption and emission spectra of **8Ph[Li]** as PMMA film.

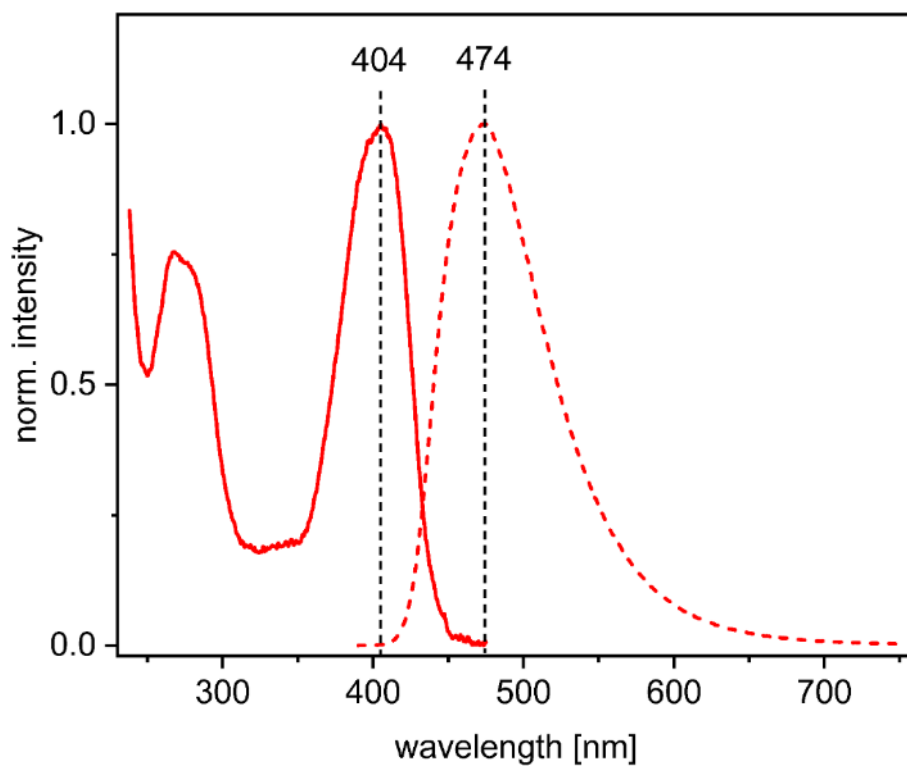

**Fig. S157**

Normalized absorption and emission spectra of **8Ph[TBA]** as PMMA film.

**Table S5**Photophysical data of the compounds **5R-8R** in toluene.

| Compound                   | $\lambda_{\text{abs, max}}$<br>[nm] | $\lambda_{\text{em, max}}$<br>[nm] | $\Phi_{\text{fl}}^{[a]}$<br>[%] |
|----------------------------|-------------------------------------|------------------------------------|---------------------------------|
| <b>5Ph[Li]</b>             | 391                                 | 510                                | -                               |
| <b>5Ph[TBA]</b>            | 404                                 | 479                                | 8                               |
| <b>5F[TBA]</b>             | 354                                 | -                                  | -                               |
| <b>5Me[Li]</b>             | 399                                 | 505                                | -                               |
| <b>5Thio[Li]</b>           | 384                                 | 543                                | -                               |
| <b>5CF<sub>3</sub>[Li]</b> | 388                                 | 529                                | -                               |
| <b>5OMe[Li]</b>            | -                                   | -                                  | -                               |
| <b>5Bip[Li]</b>            | 397                                 | 516                                | -                               |
| <b>5Cbz[Li]</b>            | 390                                 | 510                                | -                               |
| <b>5Ph[Me]</b>             | 421                                 | -                                  | -                               |
| <b>6Ph[Li]</b>             | 393                                 | 504                                | -                               |
| <b>7Ph[Li]</b>             | 411                                 | 490                                | -                               |
| <b>8Ph[Li]</b>             | 410                                 | 489                                | -                               |
| <b>8Ph[TBA]</b>            | -                                   | 485                                | -                               |

[b] Fluorescence quantum yields, determined using an integration sphere.

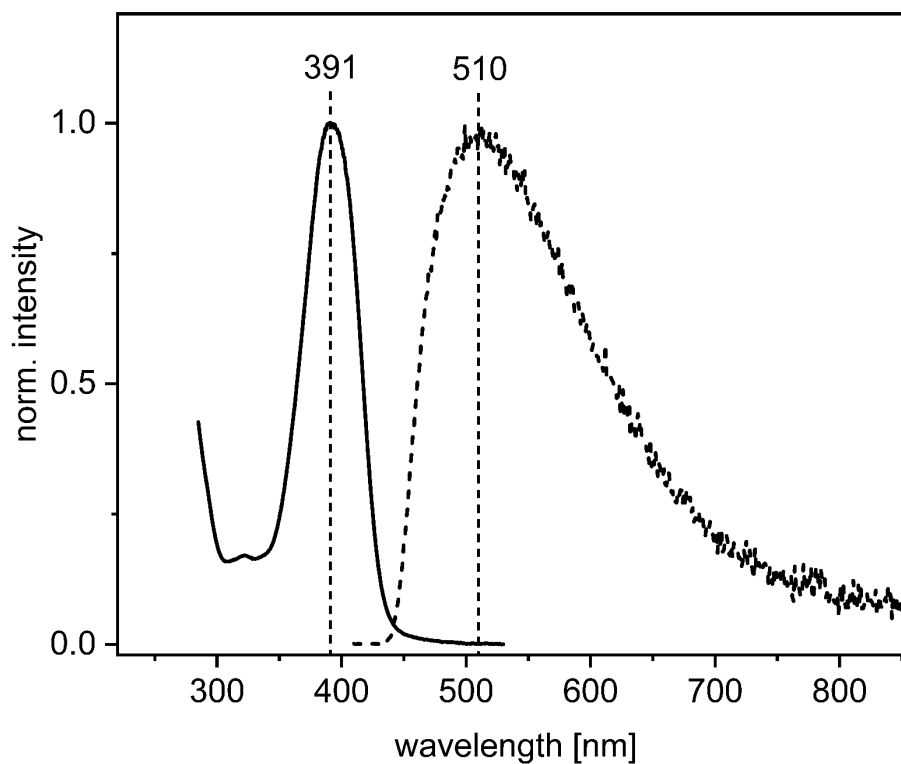**Fig. S158**Normalized absorption and emission spectra of **5Ph[Li]** in toluene.

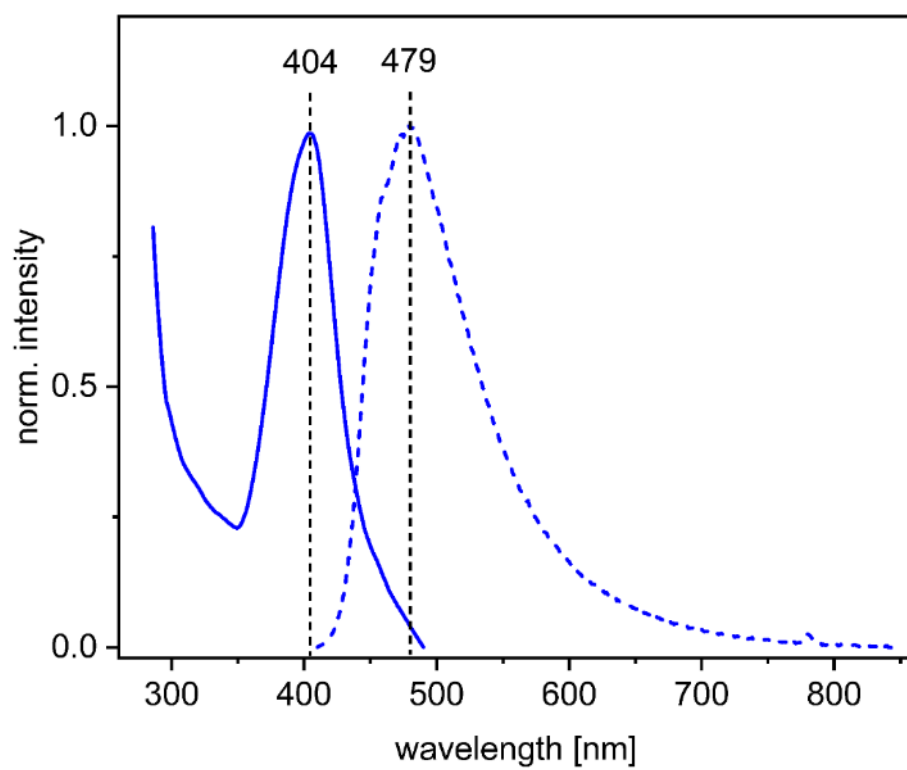

**Fig. S159** Normalized absorption and emission spectra of **5Ph[TBA]** in toluene.

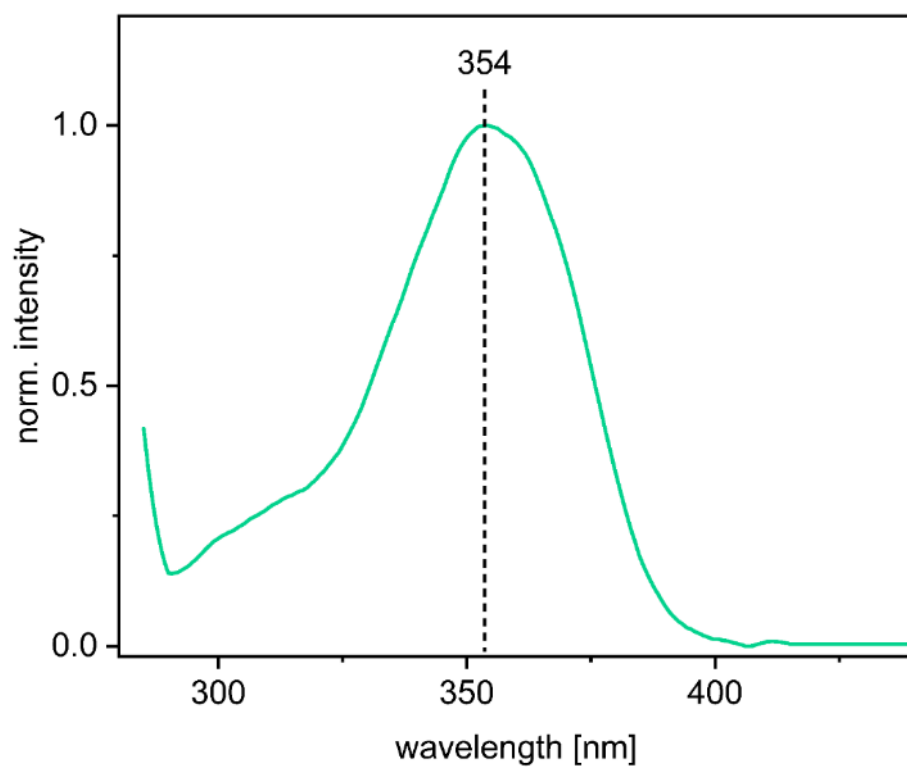

**Fig. S160** Normalized absorption spectrum of **5F[TBA]** in toluene.

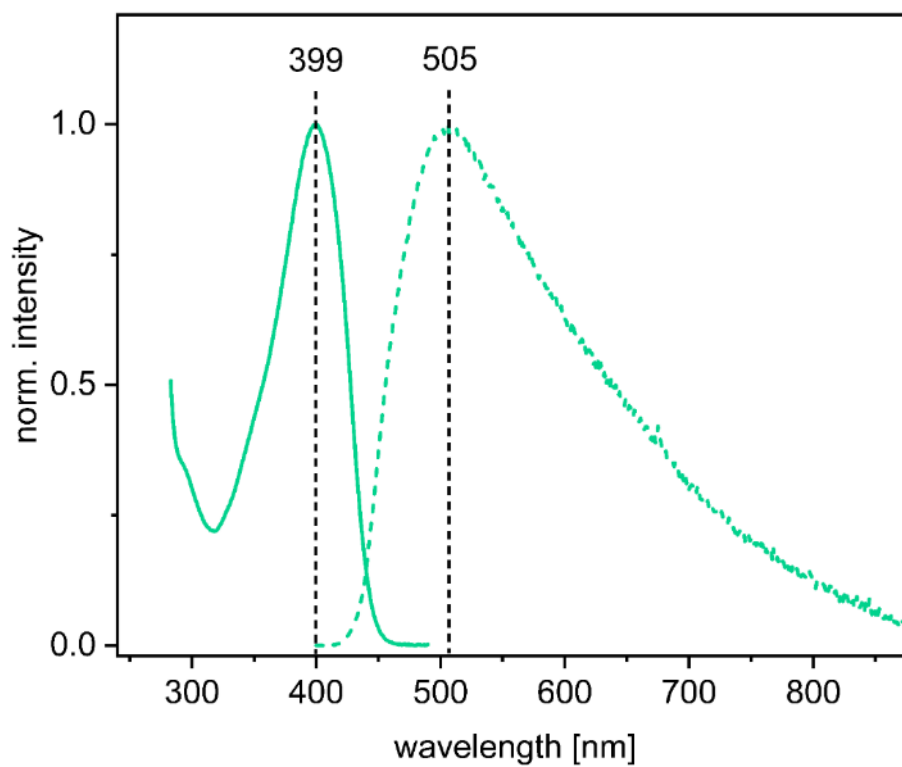

**Fig. S161**

Normalized absorption and emission spectra of **5Me[Li]** in toluene.

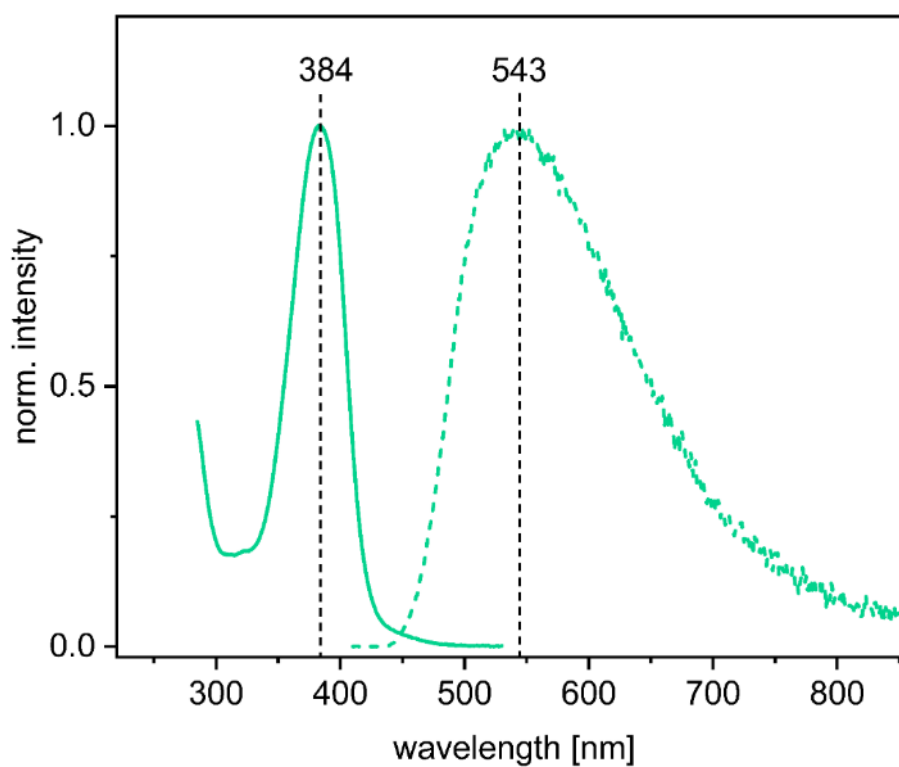

**Fig. S162**

Normalized absorption and emission spectra of **5Thio[Li]** in toluene.

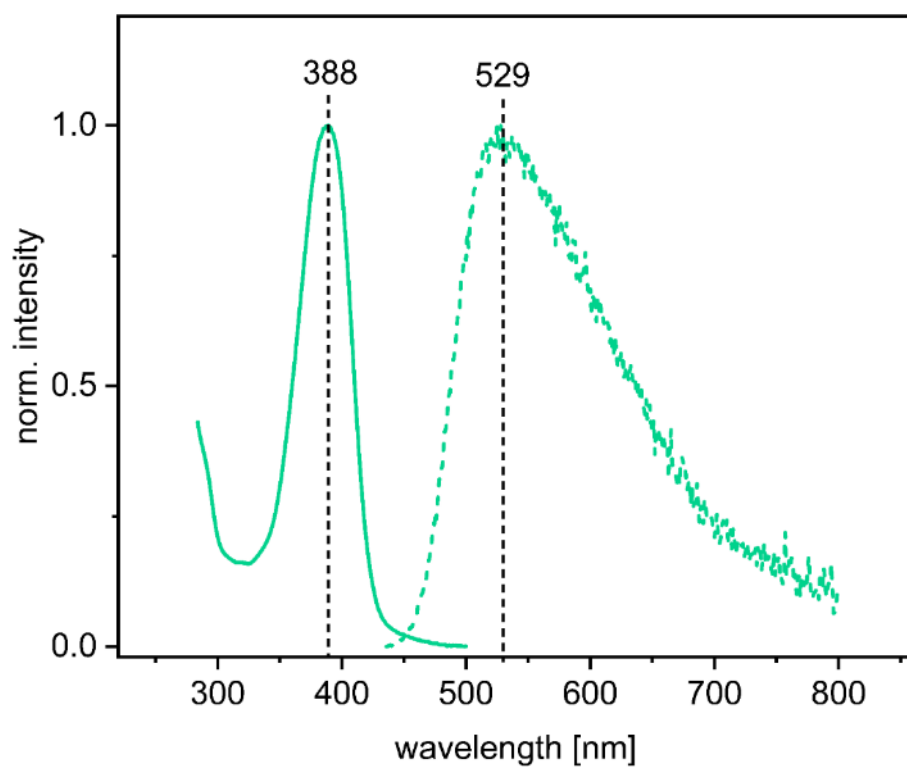

**Fig. S163** Normalized absorption and emission spectra of **5CF<sub>3</sub>[Li]** in toluene.

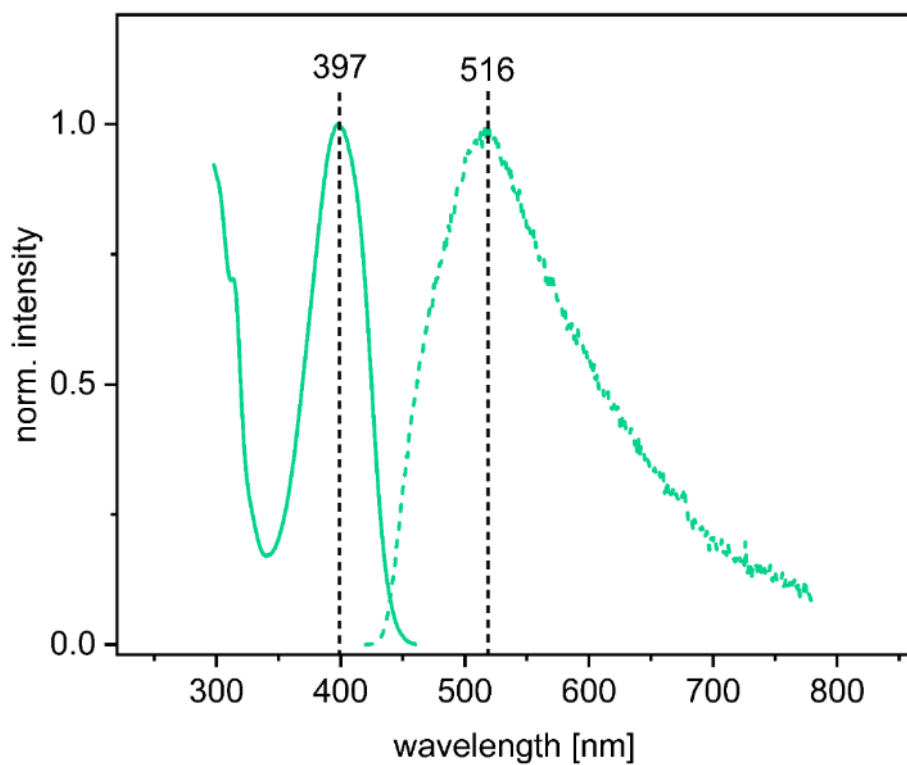

**Fig. S164** Normalized absorption and emission spectra of **5Biph[Li]** in toluene.

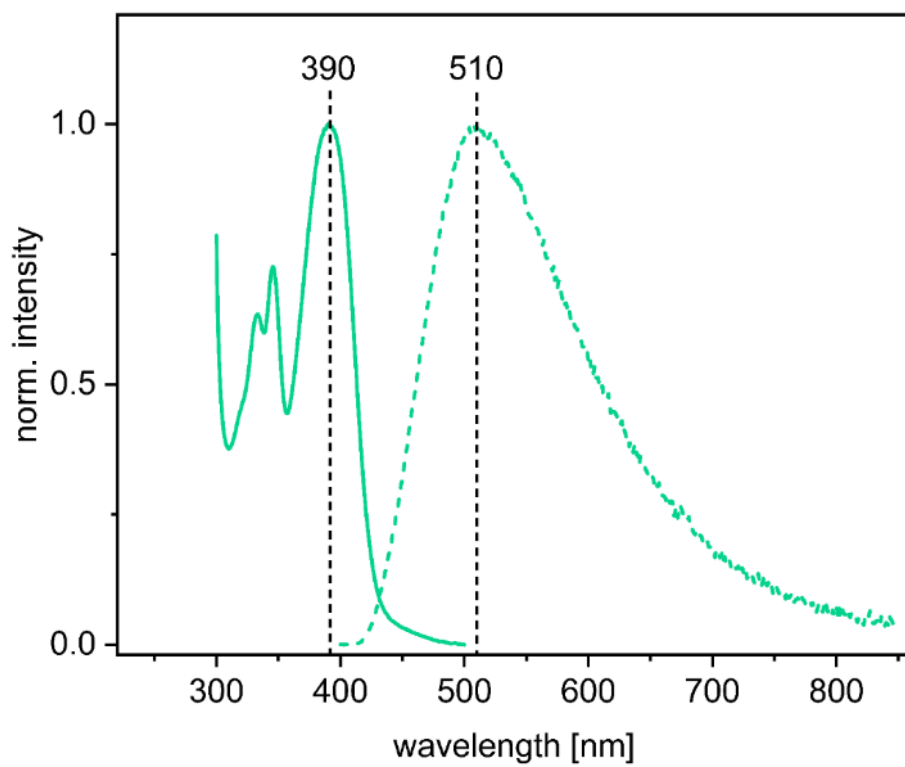

**Fig. S165** Normalized absorption and emission spectra of **5Cbz[Li]** in toluene.

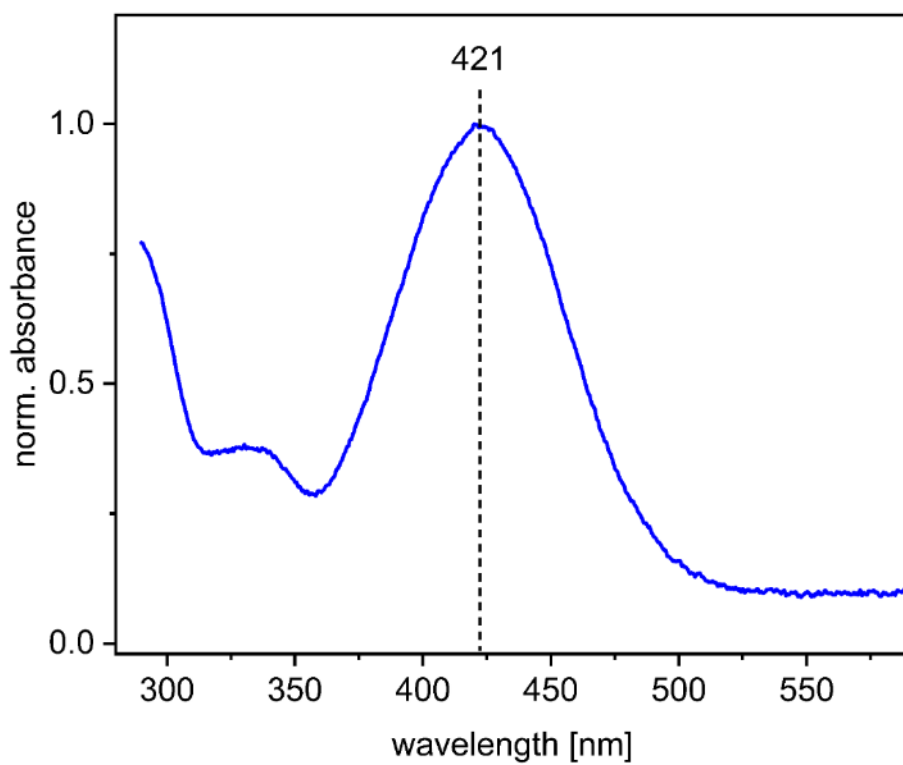

**Fig. S166** Normalized absorption spectrum of **5Ph[Me]** in toluene.

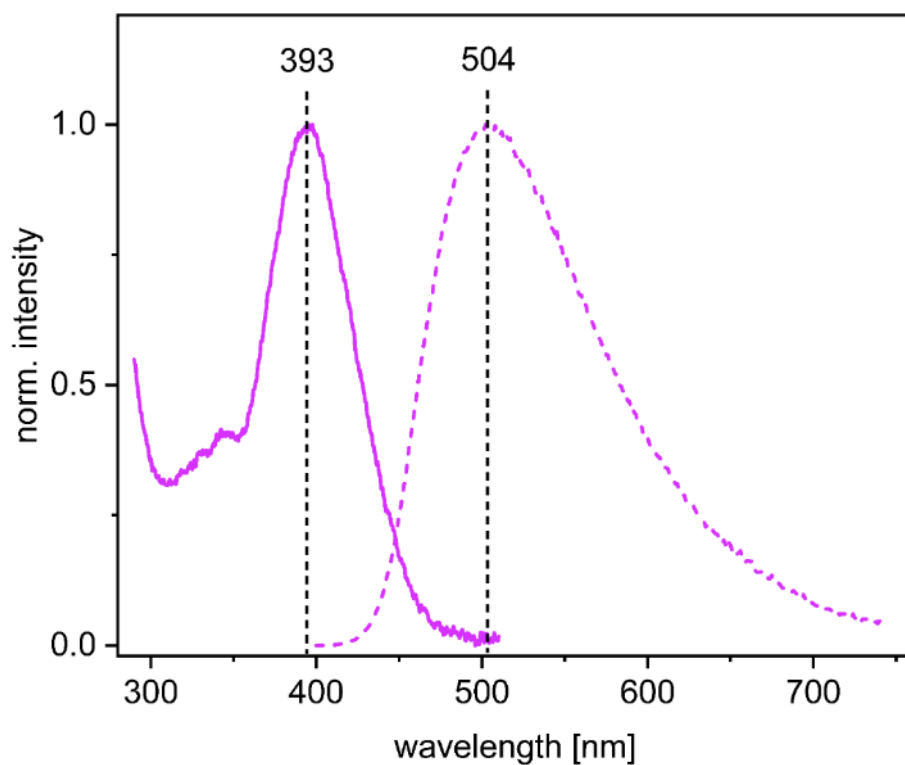

**Fig. S167** Normalized absorption and emission spectra of **6Ph[Li]** in toluene.

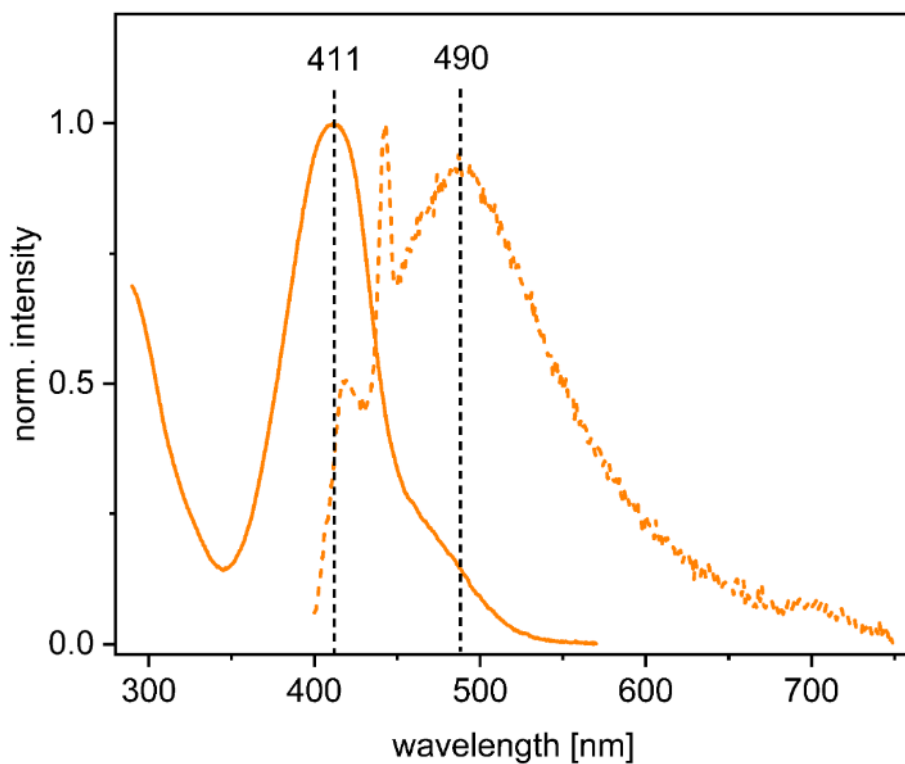

**Fig. S168** Normalized absorption and emission spectra of **7Ph[Li]** in toluene.



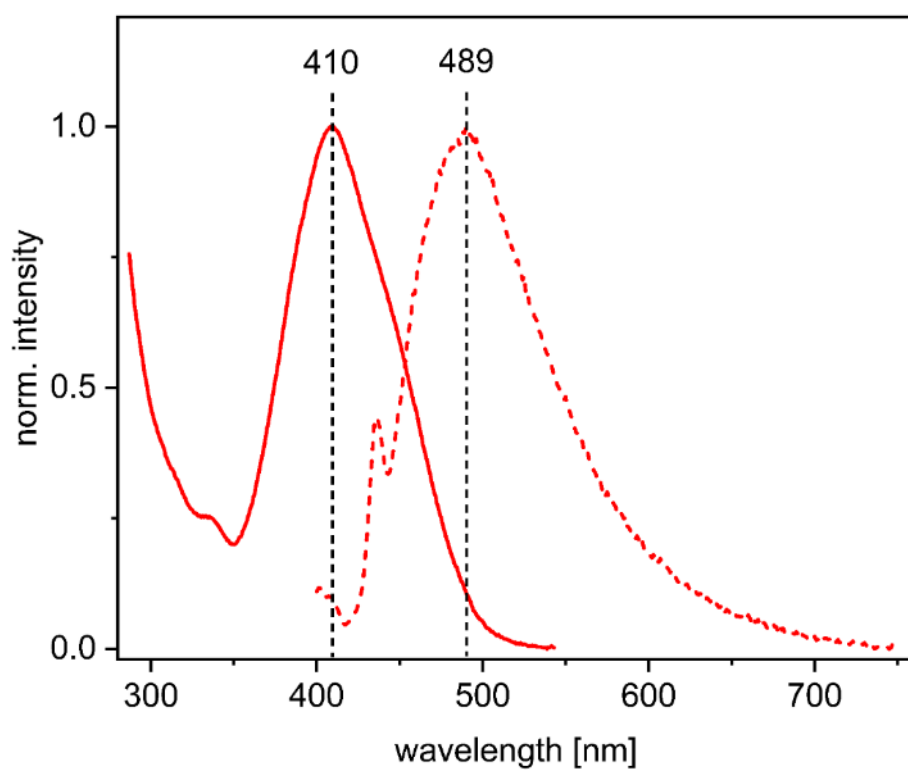

**Fig. S169**

Normalized absorption and emission spectra of **8Ph[Li]** in toluene.

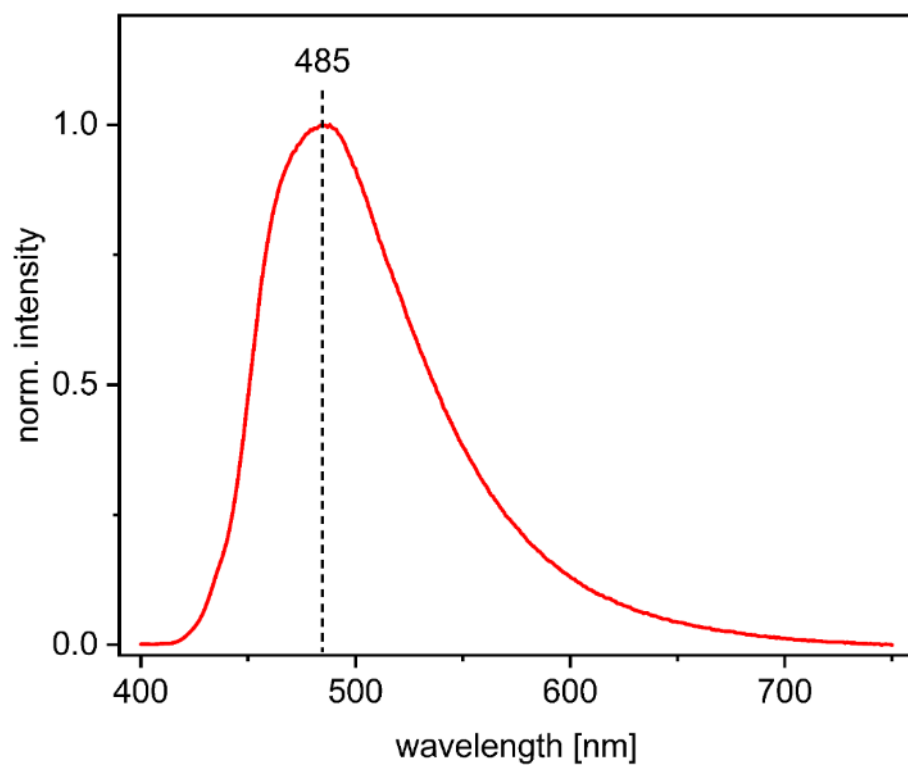

**Fig. S170**

Normalized emission spectrum of **8Ph[TBA]** in toluene.

## 4 Computational details

All calculations were carried out for the free borate anions without corresponding counter cation. DFT geometry optimizations of all compounds (ground state and excited states) were carried out with the Gaussian 16, Revision C.01 program package<sup>8</sup> using the  $\omega$ B97X-D functional<sup>9</sup> in combination with the def2-SVP basis set.<sup>10</sup> All structures were fully optimized and confirmed as minima on the corresponding potential energy surface by vibrational frequency computations, which revealed that all eigenvalues of the Hessian matrices are positive. NBO analysis was carried out with the NBO 7.0 extension<sup>11</sup> (see **Table S7**). The frontier molecular orbitals were visualized with the open-source program IQmol 2.8.0 molecular viewer.<sup>12</sup>

PES (Potential Energy Surface) scanning for the rotational barriers of the phenyl (**5Ph<sup>-</sup>**) and xylyl (**6Ph<sup>-</sup>**) substituents (see **Fig. S114** and **Fig. S115**) were performed by using opt=modredundant keyword at  $\omega$ B97X-D<sup>9</sup> / def2-SVP<sup>10</sup> level of theory and scanning along the N <sub>$\beta$</sub> -N <sub>$\alpha$</sub> -C<sub>q</sub><sup>N</sup>-C<sup>Ph</sup> dihedral angle  $\alpha$  (360°, stepsize = 5.0).

Vertical singlet excitations (10 states) were calculated with the geometries from the DFT-calculations ( $\omega$ B97X-D / def2-SVP) by means of time dependent (TD) DFT with Gaussian 16, using the tHCTHhyb functional<sup>13</sup> and the def2-TZVPP basis set<sup>10, 14</sup> in a solvation model mimicking tetrahydrofuran (see **Table S6**). For **5Ph<sup>-</sup>**, the first excited state was optimized and confirmed as minimum on the corresponding potential energy surface by vibrational frequency computation at  $\omega$ B97X-D<sup>9</sup> / def2-SVP<sup>10</sup> level of theory.

The electron excitation analysis of **5Ph<sup>-</sup>**, **5Ph[Me]**, **6Ph<sup>-</sup>** and **7Ph<sup>-</sup>** were performed using the Multiwfn program package<sup>15</sup> and the TD-DFT-calculation results, selecting the S<sub>0</sub>→S<sub>1</sub> excitation. Mulliken-like partition was selected for the interfragment charge transfer (IFCT) analysis. The input atom indices of each fragment are given in **Table S9**. Only non-hydrogen-atoms were considered. As no significant contribution from the exocyclic boron substituents was found in preliminary computations, these atoms were not included in the calculation. The hole-electron and transition density analysis was visualized from the post-processing menu as isosurface plot (isovalue 0.002).

## Rotational barriers

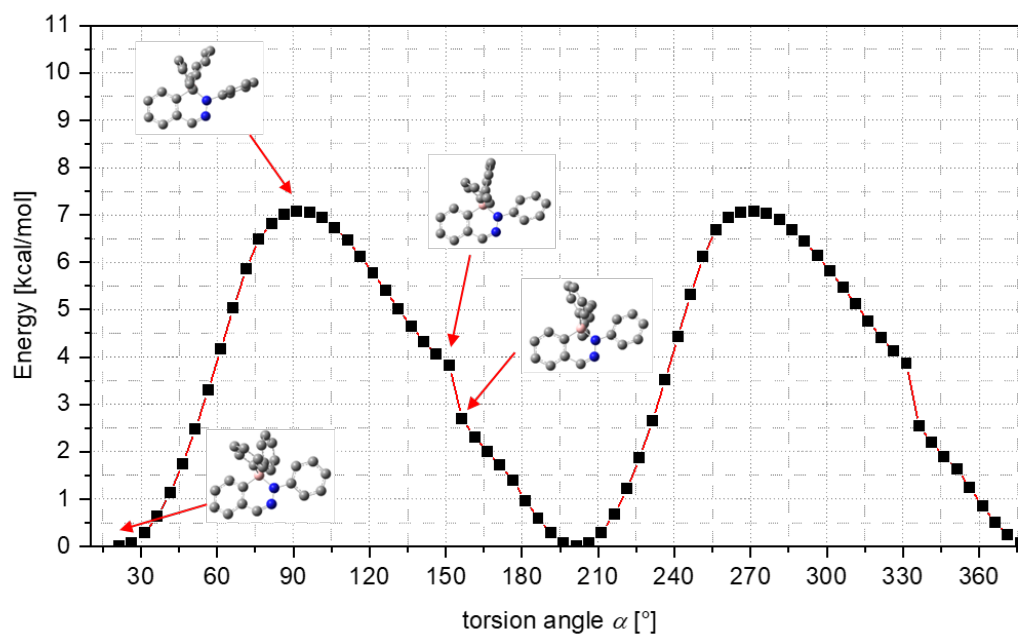

**Fig. S114** PES scan of the rotation of the phenyl substituent of **5Ph<sup>-</sup>** by rotation around the  $N_{\delta}-N_{\alpha}-C_q^N-C^{Ph}$  dihedral angle  $\alpha$ , starting from optimized structure with  $\alpha = 21.4^\circ$  ( $\omega$ B97X-D / def2-SVP, 360° scan, stepsize=5.0, dihedral scan).

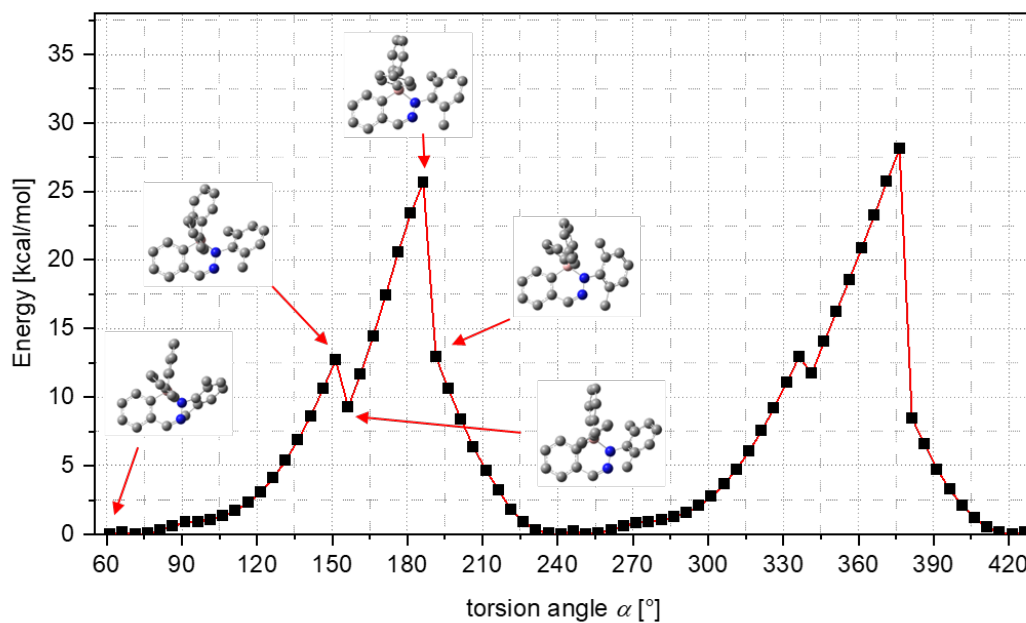

**Fig. S115** PES scan of the rotation of the phenyl substituent of **6Ph<sup>-</sup>** by rotation around the  $N_{\delta}-N_{\alpha}-C_q^N-C^{Ph}$  dihedral angle  $\alpha$ , starting from optimized structure with  $\alpha = 61.3^\circ$  ( $\omega$ B97X-D / def2-SVP, 360° scan, stepsize=5.0, dihedral scan).

## Calculated UV-Vis spectra

**Table S6** Calculated electronic excitations with the largest oscillator strength (tHCTHhyb / def2-TZVPP / solvent=tetrahydrofuran / td(nstates=10)) and experimental absorption maxima of **5R<sup>-</sup>**, **6Ph<sup>-</sup>**, **7Ph<sup>-</sup>**, **8Ph<sup>-</sup>**, and **5Ph[Me]**.

| Compound                           | State | Symmetry       | $\lambda_{exp}$<br>[nm] | $\lambda_{calc}$<br>[nm] | Oscillator strength | Main excitation         |
|------------------------------------|-------|----------------|-------------------------|--------------------------|---------------------|-------------------------|
| <b>5F<sup>-</sup></b>              | 1     | <sup>1</sup> A | 355                     | 362                      | 0.6747              | HOMO→LUMO               |
| <b>5Me<sup>-</sup></b>             | 1     | <sup>1</sup> A | 404                     | 415                      | 0.4337              | HOMO→LUMO               |
| <b>5Thio<sup>-</sup></b>           | 1     | <sup>1</sup> A | 388                     | 392                      | 0.3821              | HOMO→LUMO               |
| <b>5Ph<sup>-</sup></b>             | 1     | <sup>1</sup> A | 398                     | 401                      | 0.3687              | HOMO→LUMO               |
| <b>5CF<sub>3</sub><sup>-</sup></b> | 1     | <sup>1</sup> A | 395                     | 404                      | 0.2606              | HOMO→LUMO <sup>*1</sup> |
| <b>5OMe<sup>-</sup></b>            | 1     | <sup>1</sup> A | 398                     | 401                      | 0.3632              | HOMO→LUMO               |
| <b>5Bip<sup>-</sup></b>            | 2     | <sup>1</sup> A | 404                     | 409                      | 0.3461              | HOMO→LUMO               |
| <b>5Cbz<sup>-</sup></b>            | 3     | <sup>1</sup> A | 397                     | 402                      | 0.2999              | HOMO→LUMO+2             |
| <b>6Ph<sup>-</sup></b>             | 1     | <sup>1</sup> A | 390                     | 399                      | 0.2452              | HOMO→LUMO               |
| <b>7Ph<sup>-</sup></b>             | 1     | <sup>1</sup> A | 410                     | 421                      | 0.3152              | HOMO→LUMO               |
| <b>5Ph[Me]</b>                     | 1     | <sup>1</sup> A | 415                     | 443                      | 0.2043              | HOMO→LUMO               |
| <b>8Ph<sup>-</sup></b>             | 1     | <sup>1</sup> A | 403                     | 406                      | 0.3507              | HOMO→LUMO               |

<sup>\*1</sup> With minor contribution from HOMO→LUMO+1.

## Mulliken- and NBO-charges

**Table S7** Calculated Mulliken- and NBO charges for the neutral DAB **1Ph** and the parent DABate **5Ph<sup>-</sup>** ( $\omega$ B97X-D / def2-SVP).

| Compound                        | Mulliken charges |                | NBO charges |                |
|---------------------------------|------------------|----------------|-------------|----------------|
|                                 | B                | N <sub>a</sub> | B           | N <sub>a</sub> |
| <b>1Ph</b> (DAB)                | -0.007           | -0.137         | +0.928      | -0.495         |
| <b>5Ph<sup>-</sup></b> (DABate) | -0.027           | -0.204         | +0.686      | -0.469         |

## Frontier molecular orbitals

**Table S8** Calculated HOMO and LUMO energies of **5R<sup>-</sup>**, **6Ph<sup>-</sup>**, **7Ph<sup>-</sup>**, **8Ph<sup>-</sup>**, and **5Ph[Me]** ( $\omega$ B97X-D / def2-SVP).

| Compound                           | HOMO energy (eV) | LUMO energy (eV) | HOMO-LUMO gap (eV) |
|------------------------------------|------------------|------------------|--------------------|
| <b>5F<sup>-</sup></b>              | -3.36698060368   | 4.179719420328   | 7.546700024011     |
| <b>5Me<sup>-</sup></b>             | -2.92066456656   | 4.279294583304   | 7.199959149864     |
| <b>5Thio<sup>-</sup></b>           | -3.48782846217   | 3.965969880496   | 7.453798342666     |
| <b>5Ph<sup>-</sup></b>             | -3.42583929448   | 3.947914548510   | 7.373753842993     |
| <b>5CF<sub>3</sub><sup>-</sup></b> | -3.82552428210   | 3.556831827931   | 7.382356110043     |
| <b>5OMe<sup>-</sup></b>            | -3.49057256155   | 3.876534603240   | 7.367107164789     |
| <b>5Bip<sup>-</sup></b>            | -3.37364390818   | 3.944385802646   | 7.318029710820     |
| <b>5Cbz<sup>-</sup></b>            | -3.89641066338   | 2.664153355186   | 6.560564018568     |
| <b>6Ph<sup>-</sup></b>             | -3.43113450857   | 4.098930955512   | 7.530065464085     |
| <b>7Ph<sup>-</sup></b>             | -3.33287347540   | 3.883415029088   | 7.216288504485     |
| <b>5Ph[Me]</b>                     | -7.60315103244   | -0.617130491330  | 6.986020541114     |
| <b>8Ph<sup>-</sup></b>             | -3.36825416099   | 3.97087313870    | 7.339127299686     |

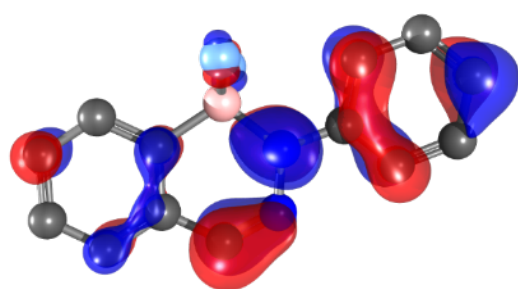

**HOMO**

-3.36698060368 eV

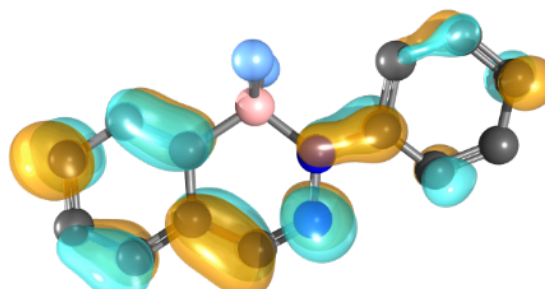

**LUMO**

4.179719420328 eV

**Fig. S116** Calculated frontier molecular orbitals (isovalue 0.10 eÅ<sup>-3</sup>) of **5F<sup>-</sup>** ( $\omega$ B97X-D / def2-SVP).

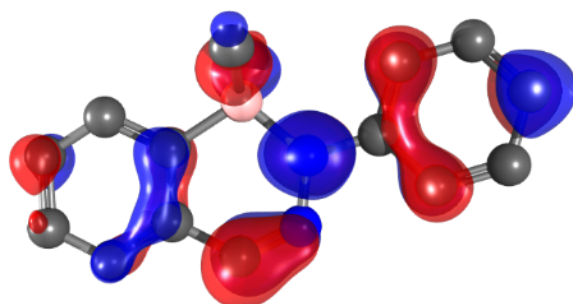

**HOMO**

-2.92066456656 eV

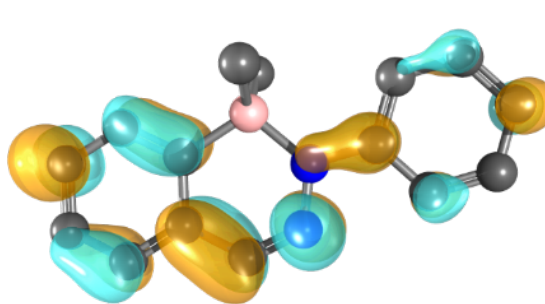

**LUMO**

4.279294583304 eV

**Fig. S117** Calculated frontier molecular orbitals (isovalue 0.10 eÅ<sup>-3</sup>) of **5Me<sup>-</sup>** ( $\omega$ B97X-D / def2-SVP).

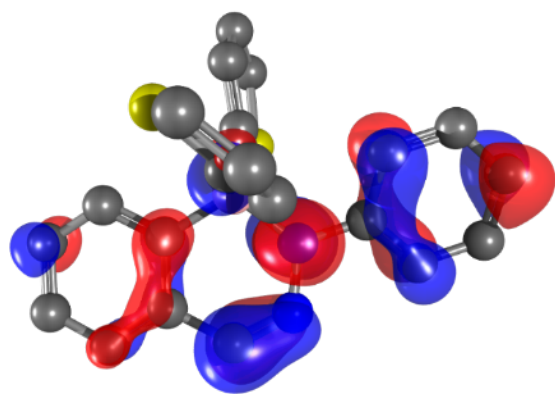

**HOMO**  
-3.48782846217 eV

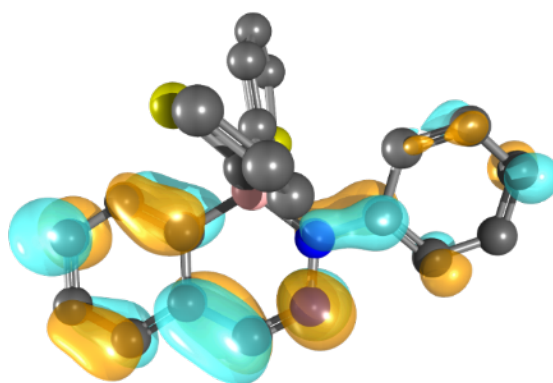

**LUMO**  
3.965969880496 eV

**Fig. S118** Calculated frontier molecular orbitals (isovalue  $0.10 \text{ e}\text{\AA}^{-3}$ ) of **5Thio<sup>-</sup>** ( $\omega$ B97X-D / def2-SVP).

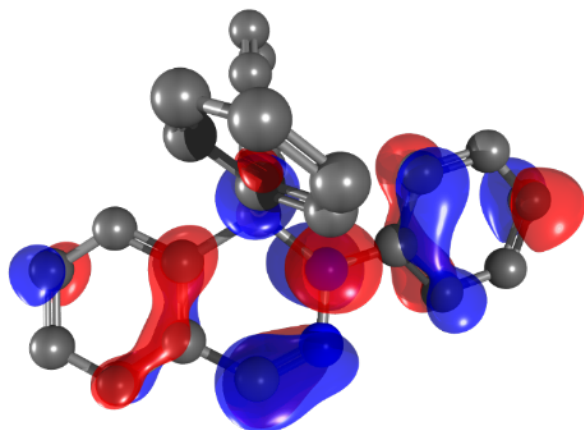

**HOMO**  
-3.42583929448 eV

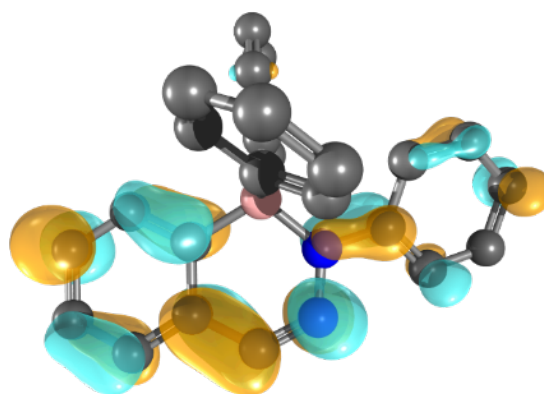

**LUMO**  
3.947914548510 eV

**Fig. S119** Calculated frontier molecular orbitals (isovalue  $0.10 \text{ e}\text{\AA}^{-3}$ ) of the ground state  $S_0$  of **5Ph<sup>-</sup>** ( $\omega$ B97X-D / def2-SVP).

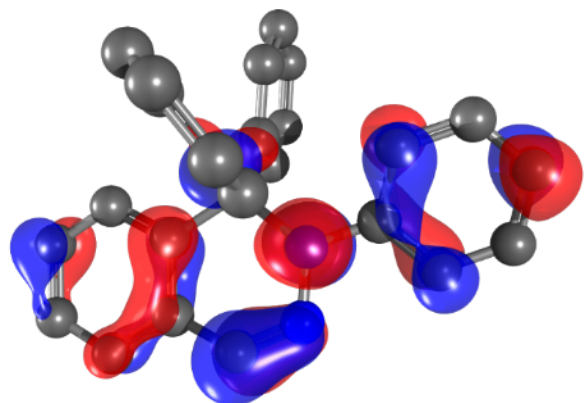

**HOMO**  
-3.42583929448 eV

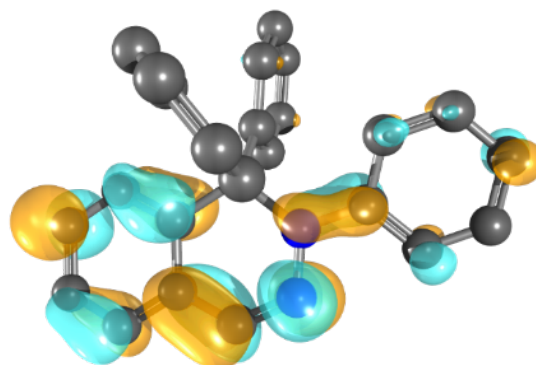

**LUMO**  
3.947914548510 eV

**Fig. S120** Calculated frontier molecular orbitals (isovalue  $0.10 \text{ e}\text{\AA}^{-3}$ ) of the first excited state  $S_1$  of **5Ph<sup>-</sup>** ( $\omega$ B97X-D / def2-SVP).

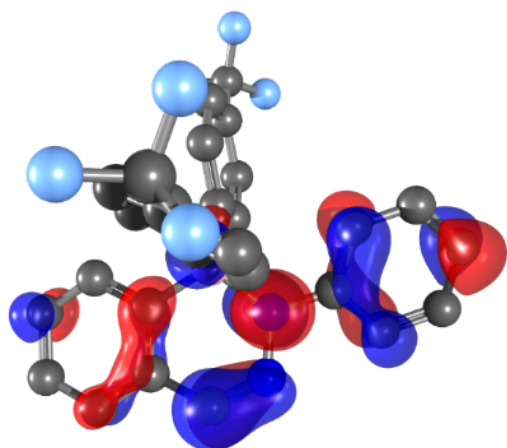

**HOMO**  
-3.82552428210 eV

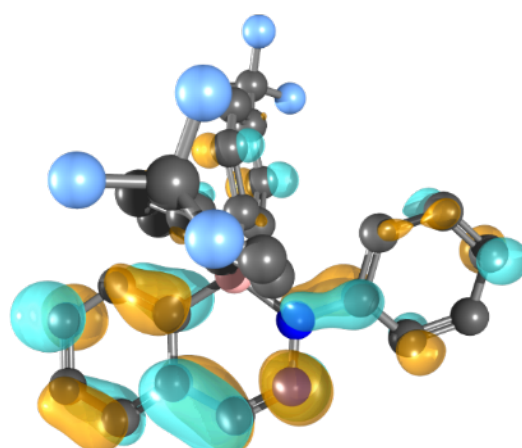

**LUMO**  
3.556831827931 eV

**Fig. S121** Calculated frontier molecular orbitals (isovalue  $0.10 \text{ e}\text{\AA}^{-3}$ ) of **5CF<sub>3</sub><sup>-</sup>** ( $\omega$ B97X-D / def2-SVP).

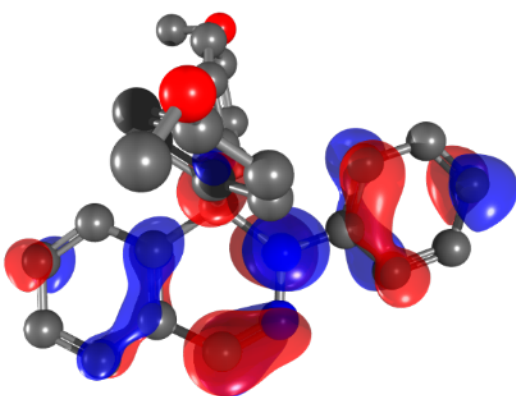

**HOMO**  
-3.49057256155 eV

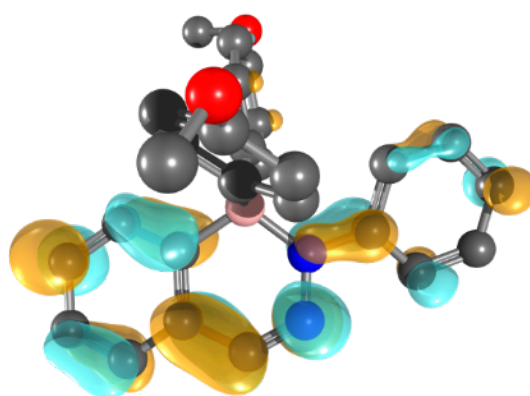

**LUMO**  
3.876534603240 eV

**Fig. S122** Calculated frontier molecular orbitals (isovalue  $0.10 \text{ e}\text{\AA}^{-3}$ ) of **5OMe<sup>-</sup>** ( $\omega$ B97X-D / def2-SVP).

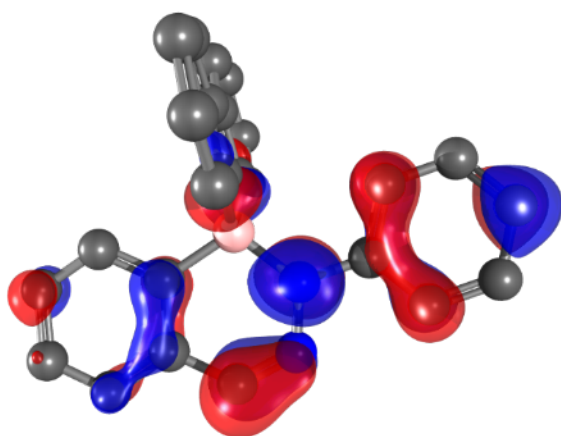

**HOMO**  
-3.37364390818 eV

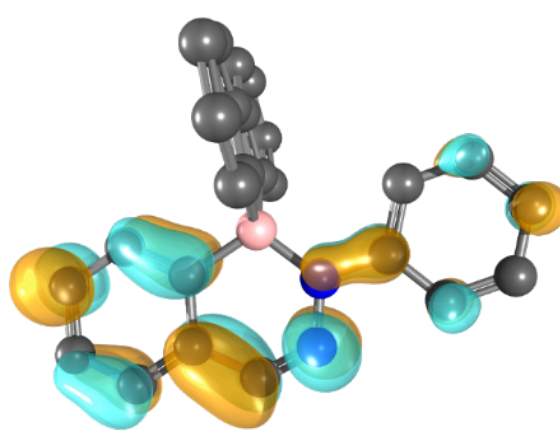

**LUMO**  
3.944385802646 eV

**Fig. S123** Calculated frontier molecular orbitals (isovalue  $0.10 \text{ e}\text{\AA}^{-3}$ ) of **5Biph<sup>-</sup>** ( $\omega$ B97X-D / def2-SVP).



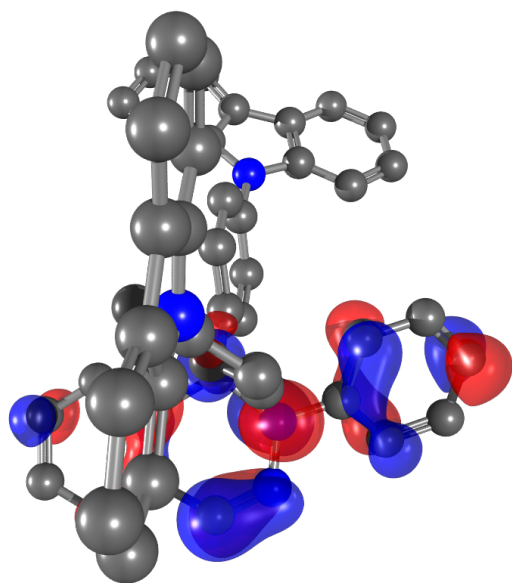

**HOMO**  
-3.89641066338 eV

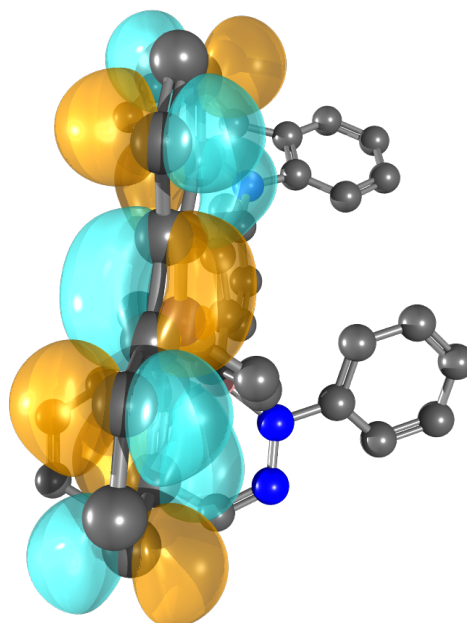

**LUMO**  
2.664153355186 eV

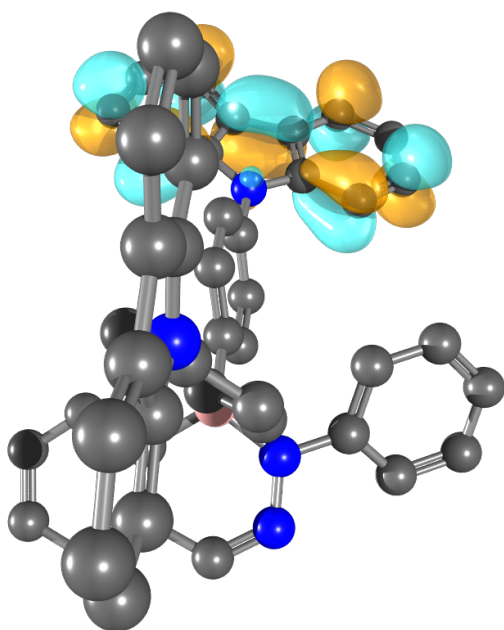

**LUMO+1**  
2.68418490241044 eV

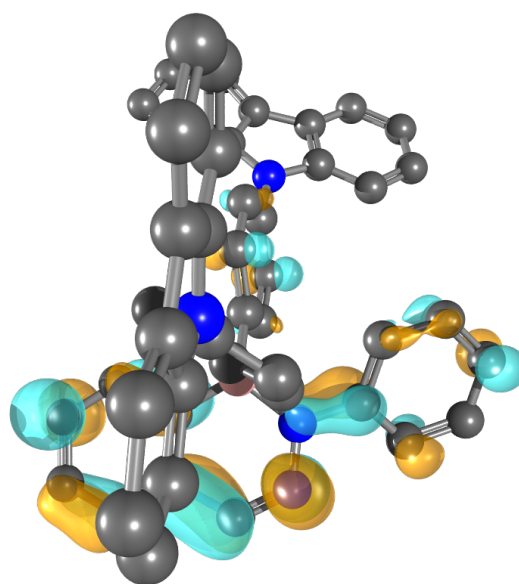

**LUMO+2**  
3.4872560389524 eV

**Fig. S124**

Calculated frontier molecular orbitals (isovalue  $0.10 \text{ e}\text{\AA}^{-3}$ ) of **5Cbz<sup>-</sup>** ( $\omega$ B97X-D / def2-SVP).



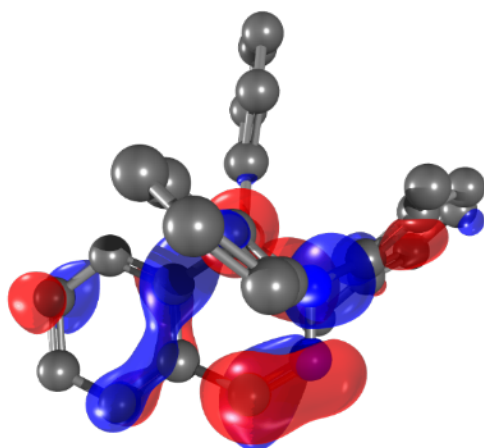

**HOMO**  
-3.43113450857 eV

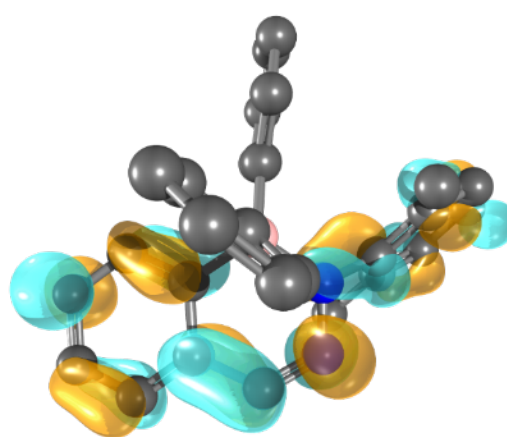

**LUMO**  
4.098930955512 eV

**Fig. S125** Calculated frontier molecular orbitals (isovalue  $0.10 \text{ e}\text{\AA}^{-3}$ ) of **6Ph<sup>-</sup>** ( $\omega$ B97X-D / def2-SVP).

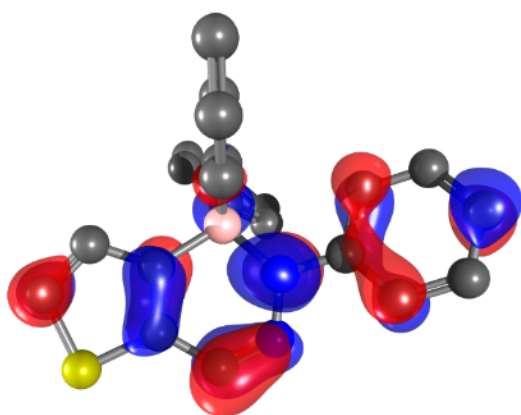

**HOMO**  
-3.33287347540 eV

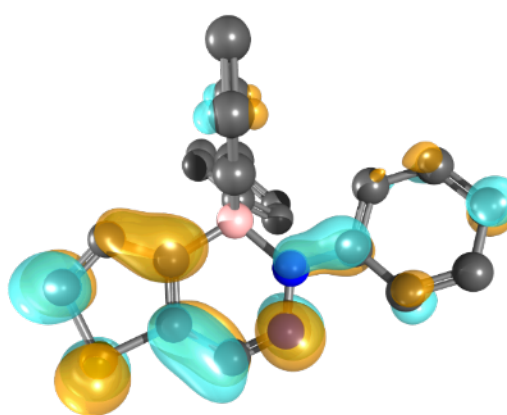

**LUMO**  
3.883415029088 eV

**Fig. S126** Calculated frontier molecular orbitals (isovalue  $0.10 \text{ e}\text{\AA}^{-3}$ ) of **7Ph<sup>-</sup>** ( $\omega$ B97X-D / def2-SVP).

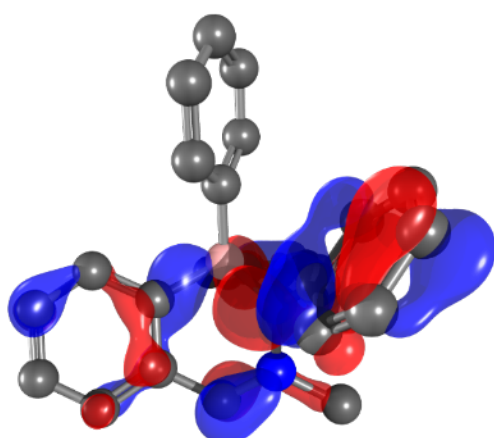

**HOMO**  
-7.60315103244 eV

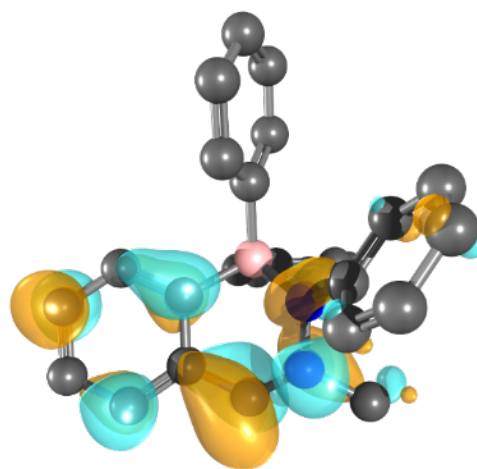

**LUMO**  
-0.617130491330 eV

**Fig. S127** Calculated frontier molecular orbitals (isovalue  $0.10 \text{ e}\text{\AA}^{-3}$ ) of **5Ph[Me]** ( $\omega$ B97X-D / def2-SVP).

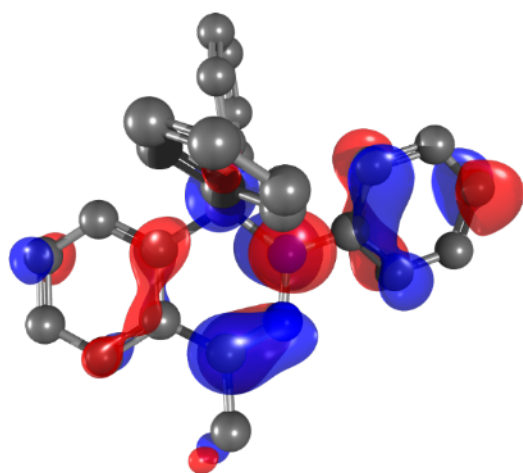

**HOMO**

-3.368254160986 eV

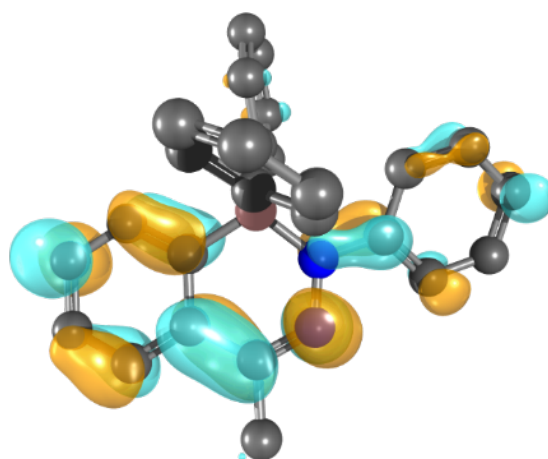

**LUMO**

3.9708731387 eV

**Fig. S128**

Calculated frontier molecular orbitals (isovalue  $0.10 \text{ e}\text{\AA}^{-3}$ ) of **8Ph<sup>-</sup>** ( $\omega$ B97X-D / def2-SVP).

## Electron excitation analysis

**Table S9** Interfragment charge transfer (IFCT) analysis with Mulliken-like partition of **5Ph<sup>-</sup>**, **6Ph<sup>-</sup>**, **5Ph[Me]**, and **7Ph<sup>-</sup>** for the first excited state.

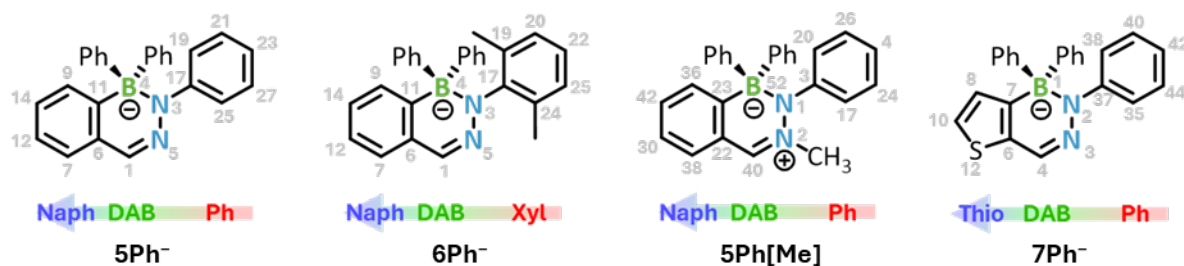

| Fragment characterization |          |                    |                        |                            |                               |
|---------------------------|----------|--------------------|------------------------|----------------------------|-------------------------------|
|                           | Fragment | Input atom indices | Hole (h <sup>+</sup> ) | Electron (e <sup>-</sup> ) | IF e <sup>-</sup> retribution |
| <b>5Ph<sup>-</sup></b>    | Naph     | 6 7 9 11 12 14     | 15.09%                 | 44.22%                     | 0.06671                       |
|                           | DAB      | 1 3 4 5 6 11       | 56.03%                 | 50.11%                     | 0.28076                       |
|                           | Ph       | 17 19 21 23 25 27  | 27.36%                 | 16.09%                     | 0.04402                       |
| <b>6Ph<sup>-</sup></b>    | Naph     | 6,7,9,11,12,14     | 19.28%                 | 42.18%                     | 0.08133                       |
|                           | DAB      | 1,3,4,5,6,11       | 70.86%                 | 48.98%                     | 0.34707                       |
|                           | Xyl      | 17,19,20,22,24,25  | 8.11%                  | 18.08%                     | 0.01466                       |
| <b>5Ph[Me]</b>            | Naph     | 36,42,30,38,22,23  | 15.57%                 | 35.40%                     | 0.05511                       |
|                           | DAB      | 23,22,40,52,1,2    | 52.19%                 | 64.66%                     | 0.33746                       |
|                           | Ph       | 3,20,26,4,24,17    | 29.61%                 | 6.38%                      | 0.01890                       |
| <b>7Ph<sup>-</sup></b>    | Thio     | 6,7,8,10,12        | 20.60%                 | 46.89%                     | 0.09660                       |
|                           | DAB      | 1,2,3,4,6,7        | 58.37%                 | 50.61%                     | 0.29541                       |
|                           | Ph       | 35,37,38,40,42,44  | 24.25%                 | 14.14%                     | 0.03429                       |

| Transferred electrons between fragments |           |           |              |              |
|-----------------------------------------|-----------|-----------|--------------|--------------|
|                                         | Fragments | Electrons | Intrinsic CT | Intrinsic LE |
| <b>5Ph<sup>-</sup></b>                  | DAB→Naph  | 0.24776   | 69.59%       | 39.15%       |
|                                         | Ph→DAB    | 0.13711   |              |              |
|                                         | Ph→Naph   | 0.12099   |              |              |
| <b>6Ph<sup>-</sup></b>                  | DAB→Naph  | 0.29885   | 63.02%       | 44.31%       |
|                                         | Xyl→DAB   | 0.03971   |              |              |
|                                         | Xyl→Naph  | 0.03419   |              |              |
| <b>5Ph[Me]</b>                          | DAB→Naph  | 0.18474   | 62.49%       | 41.15%       |
|                                         | Ph→DAB    | 0.19145   |              |              |
|                                         | Ph→Naph   | 0.10481   |              |              |
| <b>7Ph<sup>-</sup></b>                  | DAB→Thio  | 0.27371   | 72.61%       | 42.63%       |
|                                         | Ph→DAB    | 0.12272   |              |              |
|                                         | Ph→Thio   | 0.11371   |              |              |

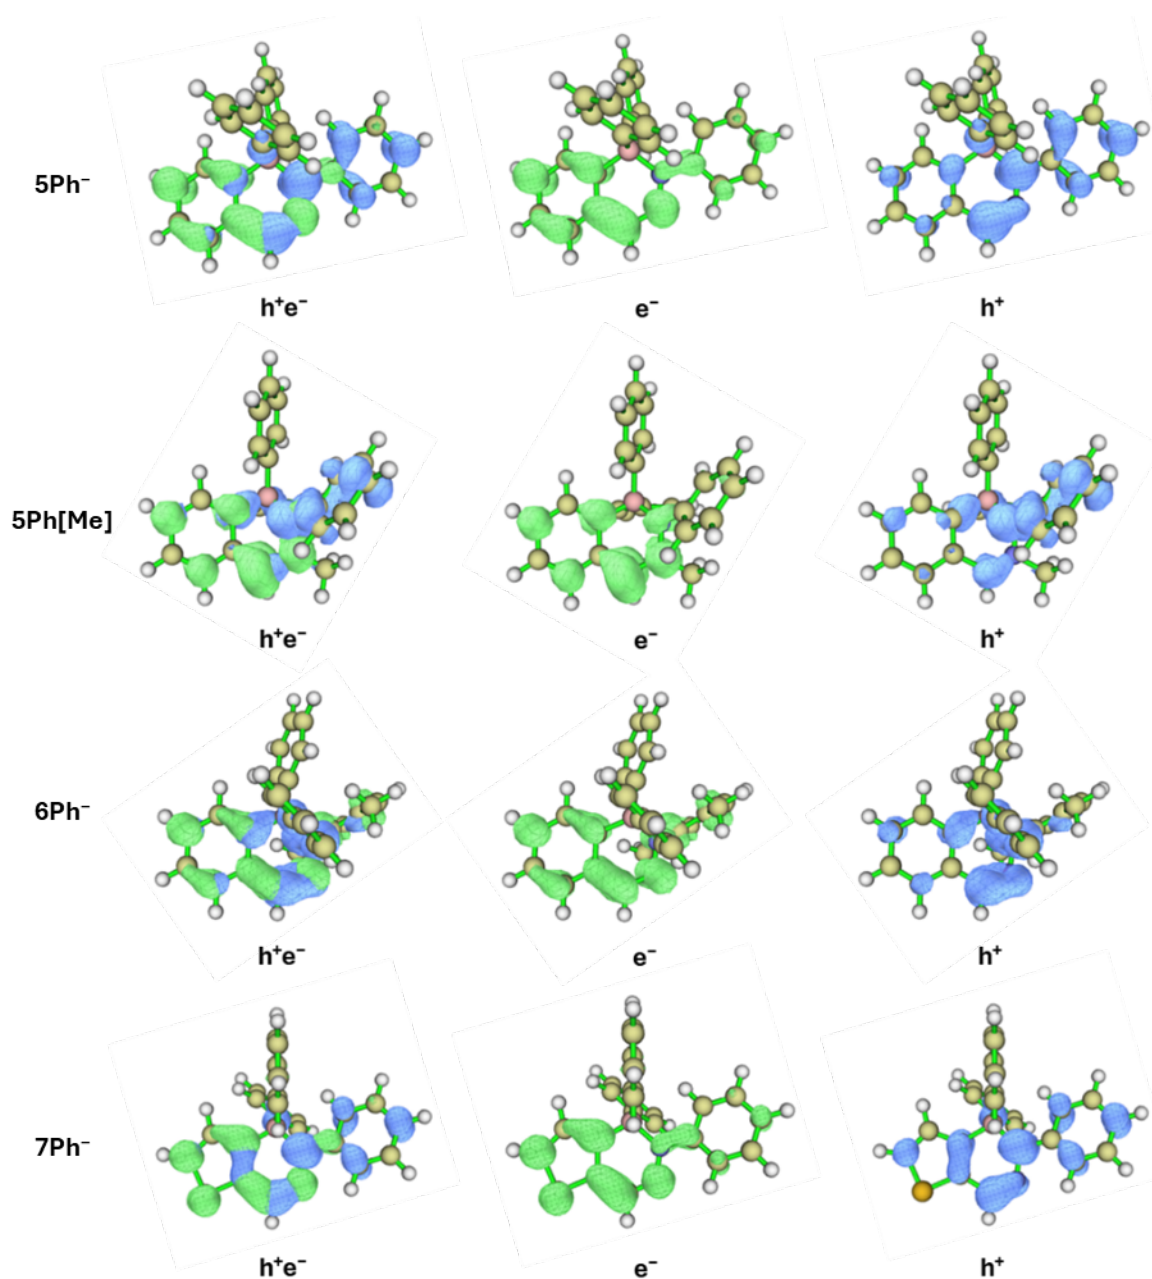

**Fig. S129**

Visualized hole-electron and transition density analysis of **5Ph<sup>-</sup>**, **5Ph[Me]**, **6Ph<sup>-</sup>**, and **7Ph<sup>-</sup>**. Simultaneous isosurface of hole (h<sup>+</sup>) and electron (e<sup>-</sup>) distribution (top), isosurface of electron distribution (middle, green) and isosurface of hole distribution (bottom, blue), isovalue 0.002.

## Optimized structures (.xyz-files)

Compound **5F<sup>-</sup>** @  $\omega$ B97XD / def2-SVP

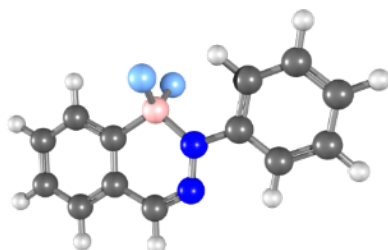

-1 1

|   |             |             |             |
|---|-------------|-------------|-------------|
| C | -1.11276600 | 1.93126900  | -0.06838300 |
| H | -1.34428700 | 3.00389100  | -0.09571100 |
| N | 0.57198600  | 0.37315800  | -0.06815000 |
| B | -0.36968500 | -0.88069300 | 0.06651300  |
| N | 0.14130700  | 1.64171000  | -0.08502100 |
| C | -2.21669100 | 0.98008600  | -0.03087500 |
| C | -3.55331300 | 1.41836500  | -0.05663600 |
| H | -3.76861300 | 2.49141900  | -0.09798000 |
| C | -2.97509300 | -1.29867800 | 0.03981400  |
| H | -2.75255200 | -2.36936300 | 0.07332800  |
| C | -1.90781100 | -0.38953500 | 0.02220500  |
| C | -4.59225600 | 0.49705600  | -0.03218000 |
| H | -5.63142300 | 0.83858700  | -0.05173400 |
| C | -4.30074100 | -0.87180500 | 0.01490100  |
| H | -5.11549100 | -1.60207300 | 0.03127300  |
| C | 1.96668100  | 0.25215900  | -0.05088800 |
| C | 2.57711000  | -1.01221100 | -0.18375900 |
| H | 1.94784800  | -1.88751500 | -0.33086400 |
| C | 3.96116500  | -1.13840900 | -0.14868500 |
| H | 4.40098000  | -2.13480900 | -0.25315500 |
| C | 4.78959000  | -0.02521500 | 0.00678000  |
| H | 5.87695000  | -0.13407900 | 0.03123300  |
| C | 2.80848600  | 1.37242100  | 0.10158600  |
| H | 2.34386100  | 2.35210100  | 0.19899200  |
| C | 4.19253800  | 1.22943400  | 0.12757900  |
| H | 4.81510200  | 2.12133500  | 0.24989700  |
| F | -0.11855900 | -1.79052000 | -0.99771300 |
| F | -0.07459500 | -1.54833900 | 1.27944700  |

Compound **5Me<sup>-</sup>** @  $\omega$ B97XD / def2-SVP

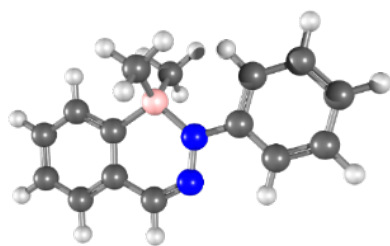

-1 1

|   |             |             |             |
|---|-------------|-------------|-------------|
| C | 1.06473800  | -1.93155000 | -0.00004600 |
| H | 1.26797000  | -3.01098500 | -0.00003600 |
| N | -0.59785600 | -0.33562700 | -0.00005300 |
| B | 0.39470800  | 0.94215800  | 0.00000800  |
| N | -0.17823900 | -1.61121400 | -0.00002700 |
| C | 2.19845700  | -1.01168500 | -0.00004400 |
| C | 3.51317500  | -1.50352900 | -0.00008700 |
| H | 3.68097200  | -2.58623900 | -0.00016600 |
| C | 3.04021200  | 1.22391500  | 0.00012700  |
| H | 2.87358700  | 2.30644500  | 0.00022300  |
| C | 1.92789300  | 0.36859200  | 0.00003700  |
| C | 4.59438700  | -0.62821500 | -0.00002100 |
| H | 5.61874400  | -1.01210800 | -0.00006300 |
| C | 4.35172200  | 0.74745400  | 0.00009600  |
| H | 5.19033700  | 1.45077500  | 0.00017300  |
| C | -1.98913900 | -0.24488500 | -0.00003200 |
| C | -2.65369600 | 1.00191100  | -0.00012700 |
| H | -2.07156200 | 1.91765900  | -0.00025200 |
| C | -4.04251300 | 1.08546200  | -0.00008900 |
| H | -4.50672500 | 2.07648700  | -0.00016500 |
| C | -4.84111900 | -0.05757900 | 0.00003600  |
| H | -5.93158300 | 0.01514200  | 0.00005900  |
| C | -2.81432800 | -1.39701800 | 0.00008000  |
| H | -2.32828900 | -2.37001400 | 0.00013700  |
| C | -4.20007500 | -1.29794200 | 0.00011600  |
| H | -4.79307200 | -2.21823300 | 0.00020600  |
| C | 0.20507200  | 1.82684900  | 1.37982300  |
| H | -0.76222500 | 2.34602600  | 1.48680300  |
| H | 0.32702100  | 1.19265400  | 2.27689200  |
| H | 0.98441300  | 2.60928300  | 1.43791400  |
| C | 0.20519000  | 1.82689400  | -1.37980600 |
| H | -0.76202600 | 2.34622400  | -1.48681800 |
| H | 0.98463800  | 2.60922300  | -1.43788000 |
| H | 0.32706500  | 1.19270600  | -2.27689200 |

Compound **5Thio**<sup>-</sup> @  $\omega$ B97XD / def2-SVP

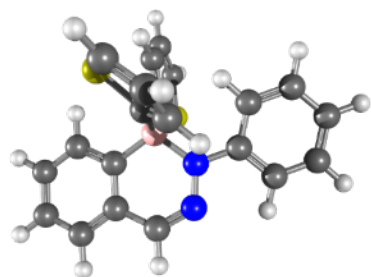

-1 1

|   |             |             |             |
|---|-------------|-------------|-------------|
| C | 0.91137700  | -0.29767000 | -2.82243300 |
| H | 1.09533300  | -0.30437200 | -3.90418400 |
| N | -0.68500500 | -0.08908100 | -1.18372800 |
| B | 0.34816800  | 0.02225700  | 0.00633500  |
| N | -0.31310900 | -0.12265900 | -2.47692100 |
| C | 2.02821700  | -0.56526800 | -1.92125800 |
| C | 3.28612700  | -0.93045300 | -2.42640800 |
| H | 3.43768000  | -0.97670000 | -3.51000200 |
| C | 2.85384500  | -0.83698800 | 0.31385200  |
| H | 2.68881000  | -0.81735700 | 1.39597600  |
| C | 1.79471400  | -0.49913500 | -0.53798500 |
| C | 4.32834700  | -1.23878600 | -1.55964800 |
| H | 5.30906400  | -1.51974300 | -1.95381700 |
| C | 4.10698300  | -1.19520800 | -0.18015000 |
| H | 4.91717700  | -1.44392800 | 0.51141500  |
| C | -2.07311400 | 0.01794400  | -1.02208700 |
| C | -2.64044000 | 0.43811700  | 0.19675700  |
| H | -1.99411300 | 0.70717200  | 1.02847200  |
| C | -4.02055500 | 0.52533200  | 0.34931100  |
| H | -4.42211100 | 0.85451000  | 1.31179400  |
| C | -4.88616900 | 0.21258300  | -0.69830000 |
| H | -5.96922300 | 0.28440900  | -0.57106500 |
| C | -2.95581100 | -0.29195700 | -2.07746600 |
| H | -2.52898100 | -0.60903800 | -3.02726300 |
| C | -4.33299900 | -0.19274600 | -1.91355100 |
| H | -4.98611900 | -0.44523000 | -2.75444700 |
| C | 0.49224500  | 1.61017700  | 0.40777600  |
| C | -0.06343000 | 2.68852500  | -0.24079400 |
| S | 1.52828400  | 2.19990900  | 1.67240200  |
| C | 0.32663000  | 3.96181300  | 0.27623300  |
| H | -0.74375700 | 2.55944600  | -1.08470700 |
| C | 1.19477000  | 3.85584200  | 1.32783000  |
| H | -0.02466400 | 4.91671100  | -0.12041800 |
| H | 1.64870800  | 4.65649600  | 1.91085700  |
| C | -0.10217200 | -0.92697000 | 1.25918600  |
| C | -0.14311900 | -0.70883200 | 2.61683800  |
| S | -0.54663900 | -2.57381500 | 0.94246100  |
| C | -0.52963700 | -1.84855200 | 3.38840400  |

|   |             |             |            |
|---|-------------|-------------|------------|
| H | 0.08812300  | 0.26370900  | 3.05546200 |
| C | -0.78440000 | -2.94266700 | 2.60780100 |
| H | -0.61979600 | -1.84935300 | 4.47679600 |
| H | -1.10494700 | -3.93395600 | 2.92674700 |

Compound **5Ph<sup>-</sup>** @  $\omega$ B97XD / def2-SVP

Ground state S<sub>0</sub>

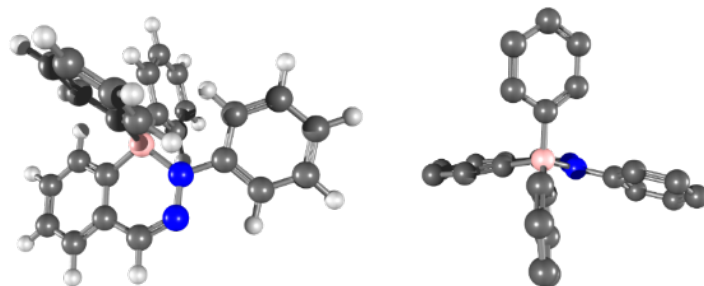

-1 1

|   |             |             |             |
|---|-------------|-------------|-------------|
| C | 1.08220700  | 0.62112900  | -2.72617200 |
| H | 1.33298600  | 1.00588500  | -3.72272700 |
| N | -0.59644400 | 0.29645000  | -1.19692300 |
| B | 0.38577600  | -0.02241000 | 0.00557300  |
| N | -0.15636200 | 0.72103500  | -2.39608000 |
| C | 2.12129000  | -0.05479700 | -1.95416900 |
| C | 3.37145200  | -0.33336300 | -2.52751600 |
| H | 3.58689900  | 0.01472000  | -3.54333100 |
| C | 2.76916100  | -1.24589100 | 0.02262300  |
| H | 2.53337800  | -1.63582600 | 1.01809500  |
| C | 1.80512500  | -0.48616200 | -0.65319300 |
| C | 4.32501700  | -1.05650900 | -1.81854800 |
| H | 5.30084000  | -1.26871400 | -2.26454500 |
| C | 4.01625200  | -1.52261100 | -0.53832300 |
| H | 4.75127100  | -2.10709000 | 0.02285800  |
| C | 0.65770600  | 1.35112600  | 0.87759300  |
| C | -1.98899800 | 0.35436300  | -1.08106000 |
| C | -0.18789400 | -1.28272200 | 0.89052800  |
| C | -2.62086700 | 0.39609500  | 0.17747900  |
| H | -2.01900200 | 0.40925800  | 1.08316000  |
| C | -4.00756400 | 0.43763500  | 0.28022700  |
| H | -4.45994900 | 0.46800100  | 1.27535700  |
| C | -4.81663600 | 0.45251500  | -0.85571600 |
| H | -5.90539400 | 0.48518600  | -0.76749100 |
| C | -2.81543500 | 0.37737500  | -2.22402300 |
| H | -2.33866000 | 0.35842300  | -3.20278400 |
| C | -4.20006100 | 0.42775700  | -2.10754200 |
| H | -4.80873800 | 0.44016100  | -3.01681600 |
| C | 1.61546600  | 1.39501800  | 1.90735300  |



|   |             |             |             |
|---|-------------|-------------|-------------|
| H | 2.19044000  | 0.49289900  | 2.13794800  |
| C | 1.87556100  | 2.55317800  | 2.63890200  |
| H | 2.62830000  | 2.53898300  | 3.43316500  |
| C | 1.18465200  | 3.73161300  | 2.35312300  |
| H | 1.38481800  | 4.64488400  | 2.92088200  |
| C | 0.24373000  | 3.72712300  | 1.32513900  |
| H | -0.29988000 | 4.64388200  | 1.07732100  |
| C | -0.60450500 | -2.44568400 | 0.21847600  |
| H | -0.57708900 | -2.45415400 | -0.87581800 |
| C | -0.24798800 | -1.32009900 | 2.29087800  |
| H | 0.04758200  | -0.43482700 | 2.86145500  |
| C | -0.00775100 | 2.55710700  | 0.60513000  |
| H | -0.74356500 | 2.58445900  | -0.20325100 |
| C | -1.05735100 | -3.57493300 | 0.89559900  |
| H | -1.37947800 | -4.45624700 | 0.33281600  |
| C | -0.69383100 | -2.44812200 | 2.98616400  |
| H | -0.72712800 | -2.43448100 | 4.07995600  |
| C | -1.10220000 | -3.58410400 | 2.29153800  |
| H | -1.45609900 | -4.46796500 | 2.82996600  |

Excited state S<sub>1</sub>

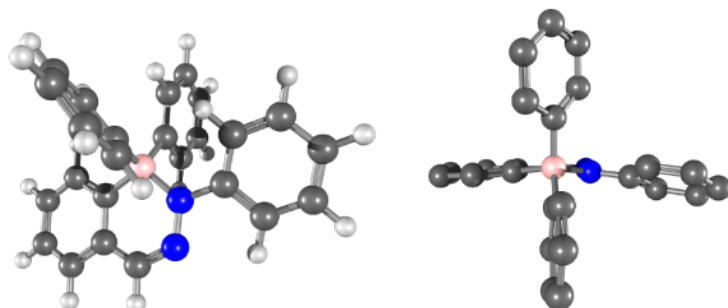

-1 1

|   |             |             |             |
|---|-------------|-------------|-------------|
| C | 1.22087000  | 0.13954900  | -2.74585600 |
| H | 1.48922200  | 0.29987400  | -3.79767400 |
| N | -0.52929300 | 0.16185100  | -1.24470900 |
| B | 0.39433300  | -0.06351000 | 0.01193700  |
| N | -0.08069700 | 0.34704500  | -2.50996700 |
| C | 2.22565800  | -0.25271000 | -1.84591300 |
| C | 3.57446100  | -0.49462600 | -2.27326600 |
| H | 3.83696100  | -0.33148800 | -3.32415600 |
| C | 2.87483100  | -0.89138400 | 0.40807200  |
| H | 2.61773200  | -1.06753400 | 1.45810400  |
| C | 1.87848200  | -0.43704500 | -0.46094900 |
| C | 4.52145000  | -0.92985800 | -1.37886800 |
| H | 5.54648900  | -1.11479200 | -1.71534600 |
| C | 4.17686400  | -1.14749400 | -0.01883900 |
| H | 4.92735000  | -1.51854500 | 0.68424300  |
| C | 0.54408300  | 1.39313100  | 0.78448000  |

|   |             |             |             |
|---|-------------|-------------|-------------|
| C | -1.90570900 | 0.27069200  | -1.13900100 |
| C | -0.22230100 | -1.30425700 | 0.89532500  |
| C | -2.54062500 | 0.54380700  | 0.09793100  |
| H | -1.94080900 | 0.71309000  | 0.98763100  |
| C | -3.92183800 | 0.63864400  | 0.17536200  |
| H | -4.38187100 | 0.85102600  | 1.14399900  |
| C | -4.72253800 | 0.48295200  | -0.96110800 |
| H | -5.81023700 | 0.56086700  | -0.88985100 |
| C | -2.72371200 | 0.15339000  | -2.29329300 |
| H | -2.23124400 | -0.02246700 | -3.24735300 |
| C | -4.10385400 | 0.24482800  | -2.19229400 |
| H | -4.71206300 | 0.13019700  | -3.09434100 |
| C | 1.10446500  | 1.49075600  | 2.07124300  |
| H | 1.42889000  | 0.58248400  | 2.58464600  |
| C | 1.27519900  | 2.71632600  | 2.71232900  |
| H | 1.71081600  | 2.74635600  | 3.71552000  |
| C | 0.90377500  | 3.90190500  | 2.07591700  |
| H | 1.03938900  | 4.86603500  | 2.57367500  |
| C | 0.36338600  | 3.83517800  | 0.79304600  |
| H | 0.07166100  | 4.75281900  | 0.27365600  |
| C | -0.26310500 | -2.57010400 | 0.28279700  |
| H | 0.10982600  | -2.66800200 | -0.74167100 |
| C | -0.69968900 | -1.23195700 | 2.21030700  |
| H | -0.70397700 | -0.26937700 | 2.73033500  |
| C | 0.18563200  | 2.60241900  | 0.16379400  |
| H | -0.24388100 | 2.58178100  | -0.84174100 |
| C | -0.75787900 | -3.69494900 | 0.93663400  |
| H | -0.77910200 | -4.65992800 | 0.42173700  |
| C | -1.18742200 | -2.35607400 | 2.88596300  |
| H | -1.54929100 | -2.25695600 | 3.91380200  |
| C | -1.22087000 | -3.59397400 | 2.25189000  |
| H | -1.60528600 | -4.47502400 | 2.77360700  |

Compound **5CF<sub>3</sub><sup>-</sup>** @  $\omega$ B97XD / def2-SVP

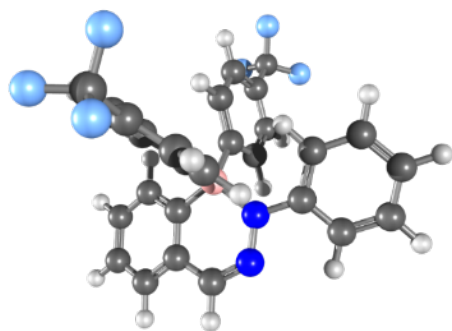

-1 1

|   |             |             |             |
|---|-------------|-------------|-------------|
| C | 0.87187300  | 3.67427500  | -0.13175000 |
| H | 1.29938000  | 4.68037200  | -0.04098500 |
| N | 0.00522100  | 1.88149700  | 1.00616700  |
| B | 0.08732400  | 0.89928800  | -0.22664800 |
| N | 0.53323200  | 3.12036000  | 0.97771400  |
| C | 0.62437100  | 3.13510400  | -1.46641800 |
| C | 0.79256100  | 3.93800000  | -2.60474900 |
| H | 1.17147100  | 4.95900600  | -2.49157000 |
| C | -0.21533100 | 1.36396600  | -2.84844300 |
| H | -0.63926000 | 0.36035000  | -2.95715100 |
| C | 0.13877200  | 1.81944400  | -1.57180500 |
| C | 0.46870700  | 3.44756300  | -3.86529000 |
| H | 0.60470800  | 4.07288700  | -4.75187600 |
| C | -0.04711700 | 2.15507100  | -3.98507700 |
| H | -0.32150500 | 1.76447400  | -4.96905800 |
| C | 1.48787100  | 0.03160900  | -0.15538200 |
| C | -0.43797900 | 1.50923200  | 2.28104200  |
| C | -1.26773100 | -0.02424900 | -0.31117700 |
| C | -0.58441100 | 0.15613600  | 2.64229600  |
| H | -0.32205800 | -0.62595300 | 1.93323800  |
| C | -1.04468100 | -0.20065500 | 3.90613700  |
| H | -1.14674000 | -1.26177200 | 4.14893000  |
| C | -1.36165900 | 0.76756100  | 4.85774200  |
| H | -1.72282800 | 0.48090800  | 5.84822700  |
| C | -0.75315900 | 2.48083900  | 3.25283200  |
| H | -0.63091800 | 3.53019900  | 2.98890000  |
| C | -1.20334600 | 2.11127400  | 4.51517600  |
| H | -1.44269400 | 2.89233500  | 5.24280700  |
| C | 1.89924700  | -0.79814500 | -1.21483700 |
| H | 1.27320800  | -0.87292400 | -2.10836700 |
| C | 3.09015300  | -1.51540800 | -1.18399000 |
| H | 3.37494100  | -2.14683700 | -2.02884400 |
| C | 3.93367500  | -1.41404300 | -0.07438200 |
| C | 3.56878800  | -0.58259400 | 0.98429500  |
| H | 4.22845900  | -0.48096700 | 1.84870000  |
| C | -2.51950600 | 0.60758500  | -0.19813200 |

|   |             |             |             |
|---|-------------|-------------|-------------|
| H | -2.54660300 | 1.68385900  | -0.00510500 |
| C | -1.28701100 | -1.40569800 | -0.54589400 |
| H | -0.34246500 | -1.95120600 | -0.61915900 |
| C | 2.36853400  | 0.12392400  | 0.93361000  |
| H | 2.11128700  | 0.77900900  | 1.76959400  |
| C | -3.71595600 | -0.08803400 | -0.30919700 |
| H | -4.66917100 | 0.43508300  | -0.20319700 |
| C | -2.47732500 | -2.12328700 | -0.66769900 |
| H | -2.45327800 | -3.20077500 | -0.84393000 |
| C | -3.70034500 | -1.46598500 | -0.55014400 |
| C | 5.19029800  | -2.22758000 | -0.01086400 |
| C | -4.98959000 | -2.20848300 | -0.72910800 |
| F | 5.76481600  | -2.37687000 | -1.21595800 |
| F | 6.11511500  | -1.68613800 | 0.79634300  |
| F | 4.97088400  | -3.47303000 | 0.45185700  |
| F | -5.47230300 | -2.10008000 | -1.98165600 |
| F | -5.95834900 | -1.75347800 | 0.08135100  |
| F | -4.86571000 | -3.52285100 | -0.48836000 |

Compound **5OMe<sup>-</sup>** @  $\omega$ B97XD / def2-SVP

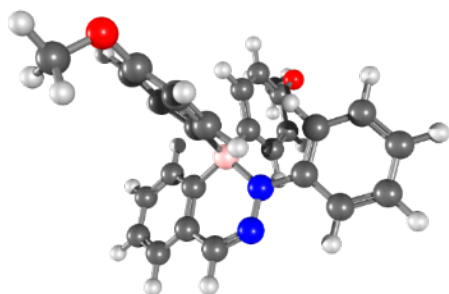

-1 1

|   |             |             |            |
|---|-------------|-------------|------------|
| C | -1.04493000 | 0.00025300  | 3.18735700 |
| H | -1.52326000 | 0.13579800  | 4.16551900 |
| N | -0.01086700 | 1.05336600  | 1.43123000 |
| B | -0.10621300 | -0.19503600 | 0.46040200 |
| N | -0.60981100 | 1.07748000  | 2.63620500 |
| C | -0.84484100 | -1.35691600 | 2.68688600 |
| C | -1.12609500 | -2.46763000 | 3.49710000 |
| H | -1.55649600 | -2.31247700 | 4.49214100 |
| C | 0.01587100  | -2.81840500 | 0.99285700 |
| H | 0.49194200  | -2.96815300 | 0.01830600 |
| C | -0.28939100 | -1.51422600 | 1.40409500 |
| C | -0.84894600 | -3.75453800 | 3.04753600 |
| H | -1.07335000 | -4.61961800 | 3.67793900 |

|   |             |             |             |
|---|-------------|-------------|-------------|
| C | -0.26585900 | -3.92829800 | 1.79002700  |
| H | -0.02782500 | -4.93425400 | 1.43198300  |
| C | -1.45237500 | -0.05994900 | -0.48313600 |
| C | 0.52320300  | 2.29457400  | 1.06796800  |
| C | 1.29266800  | -0.37558900 | -0.38108100 |
| C | 0.77585400  | 2.62017500  | -0.27903200 |
| H | 0.53013600  | 1.90635000  | -1.06188300 |
| C | 1.32229400  | 3.85156100  | -0.62622000 |
| H | 1.50542900  | 4.06624700  | -1.68262200 |
| C | 1.62488300  | 4.80695900  | 0.34360700  |
| H | 2.05428400  | 5.77204200  | 0.06371100  |
| C | 0.82549800  | 3.26998400  | 2.04077800  |
| H | 0.62228900  | 3.03445100  | 3.08433500  |
| C | 1.36306300  | 4.50042700  | 1.67973500  |
| H | 1.58873900  | 5.23109400  | 2.46235800  |
| C | -1.87938100 | -1.10924000 | -1.31642300 |
| H | -1.29637800 | -2.03460900 | -1.34971300 |
| C | -3.03266400 | -1.02988400 | -2.09576600 |
| H | -3.34171000 | -1.85700600 | -2.74072900 |
| C | -3.81358400 | 0.12429100  | -2.05552200 |
| C | -3.43296900 | 1.18129400  | -1.23295400 |
| H | -4.05086500 | 2.08309200  | -1.20521000 |
| C | 2.51298300  | -0.33745600 | 0.31667000  |
| H | 2.49477700  | -0.12919400 | 1.39101600  |
| C | 1.37539100  | -0.62873000 | -1.75672000 |
| H | 0.45891900  | -0.64439800 | -2.35356000 |
| C | -2.27232100 | 1.07924400  | -0.46354700 |
| H | -1.99863700 | 1.91861000  | 0.18131600  |
| C | 3.73946900  | -0.54001400 | -0.30907500 |
| H | 4.67677000  | -0.48850100 | 0.25189400  |
| C | 2.59470900  | -0.84633100 | -2.40550400 |
| H | 2.63972700  | -1.03886600 | -3.48074000 |
| C | 3.78042200  | -0.80255800 | -1.67960600 |
| O | 4.98637800  | -1.00145300 | -2.31819400 |
| O | -4.95252100 | 0.21452000  | -2.82849400 |
| C | -6.12235400 | -0.17923700 | -2.16990100 |
| H | -6.95911700 | -0.06510200 | -2.87483700 |
| H | -6.07501400 | -1.23520700 | -1.84220600 |
| H | -6.32367000 | 0.44234900  | -1.27698300 |
| C | 5.48866200  | -2.30170300 | -2.20292700 |
| H | 4.80152500  | -3.04811100 | -2.64534300 |
| H | 6.44686600  | -2.34022700 | -2.74176900 |
| H | 5.66432300  | -2.58792900 | -1.14868500 |

Compound **5Biph<sup>-</sup>** @  $\omega$ B97XD / def2-SVP

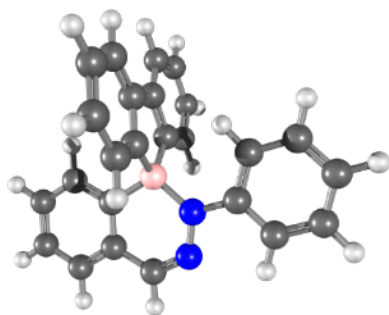

-1 1

|   |             |             |             |
|---|-------------|-------------|-------------|
| C | 0.98170200  | -3.11519000 | -0.00014900 |
| H | 1.17089600  | -4.19631600 | -0.00014200 |
| N | -0.64662500 | -1.49027200 | -0.00017200 |
| N | -0.25601200 | -2.77634700 | -0.00016100 |
| C | 2.12454400  | -2.20659200 | -0.00013100 |
| C | 3.43698200  | -2.70795100 | -0.00015500 |
| H | 3.59744400  | -3.79139400 | -0.00019500 |
| C | 2.98645000  | 0.02963900  | -0.00005900 |
| H | 2.82212900  | 1.11177200  | -0.00002200 |
| C | 1.87432300  | -0.82494400 | -0.00008400 |
| C | 4.52121800  | -1.83929900 | -0.00012800 |
| H | 5.54274700  | -2.22987500 | -0.00014700 |
| C | 4.29034100  | -0.45976100 | -0.00007400 |
| H | 5.13493100  | 0.23543300  | -0.00004500 |
| C | -2.03846700 | -1.34537500 | -0.00007900 |
| C | -2.64032900 | -0.07094400 | -0.00008600 |
| H | -2.02584800 | 0.82420200  | -0.00017000 |
| C | -4.02496100 | 0.06866800  | -0.00000900 |
| H | -4.44787500 | 1.07716900  | -0.00003400 |
| C | -4.86680400 | -1.04231400 | 0.00009200  |
| H | -5.95325200 | -0.92444400 | 0.00013500  |
| C | -2.90028800 | -2.46490200 | 0.00004400  |
| H | -2.45165800 | -3.45597500 | 0.00007100  |
| C | -4.28146900 | -2.30935000 | 0.00013500  |
| H | -4.91323300 | -3.20303000 | 0.00022700  |
| C | 0.17520700  | 0.79262000  | 1.23854700  |
| C | 0.17525700  | 0.79280500  | -1.23853800 |
| C | 0.13230600  | 0.60345500  | 2.61880500  |
| C | 0.15899500  | 2.11412800  | 0.74116400  |
| C | 0.13223000  | 0.60381400  | -2.61881500 |
| C | 0.15895700  | 2.11423800  | -0.74096100 |
| C | 0.07477700  | 1.69778800  | 3.48752300  |
| H | 0.14177300  | -0.41313800 | 3.02543300  |
| C | 0.11463800  | 3.21332500  | 1.60127300  |
| C | 0.07450300  | 1.69826200  | -3.48737500 |
| H | 0.14175300  | -0.41272700 | -3.02556800 |
| C | 0.11440000  | 3.21354700  | -1.60092000 |

|   |            |             |             |
|---|------------|-------------|-------------|
| C | 0.07137400 | 2.99964300  | 2.98039400  |
| H | 0.03340200 | 1.53820600  | 4.56926100  |
| H | 0.10606600 | 4.23379600  | 1.20578300  |
| C | 0.07102000 | 3.00004600  | -2.98006500 |
| H | 0.03301100 | 1.53883700  | -4.56913200 |
| H | 0.10577600 | 4.23396600  | -1.20529600 |
| H | 0.03058600 | 3.85263500  | 3.66397100  |
| H | 0.03006900 | 3.85312400  | -3.66352400 |
| B | 0.34366200 | -0.26761200 | -0.00007200 |

Compound **5Cbz<sup>-</sup>** @  $\omega$ B97XD / def2-SVP

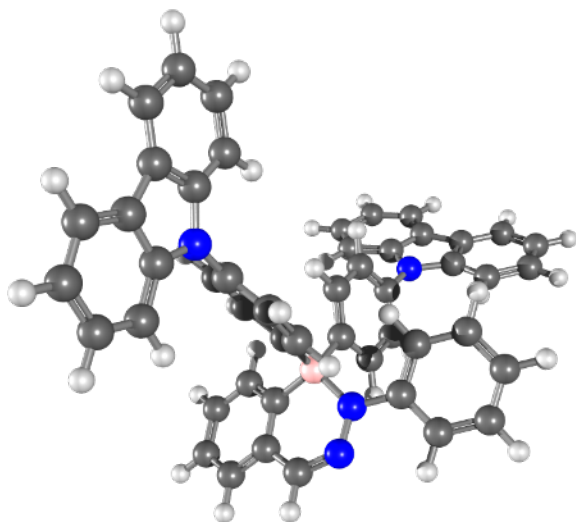

|      |             |            |             |
|------|-------------|------------|-------------|
| -1 1 |             |            |             |
| C    | 1.02500600  | 4.63512300 | -0.57620600 |
| H    | 1.49471700  | 5.62636300 | -0.57242900 |
| N    | 0.06983200  | 2.99350200 | 0.70794200  |
| B    | 0.12549400  | 1.89881300 | -0.43003300 |
| N    | 0.64964600  | 4.20205900 | 0.57491400  |
| C    | 0.76382100  | 3.98758800 | -1.85937300 |
| C    | 0.97358900  | 4.67571800 | -3.06401400 |
| H    | 1.39682700  | 5.68524200 | -3.04045000 |
| C    | -0.14811500 | 2.13739400 | -3.08367000 |
| H    | -0.61529500 | 1.14725800 | -3.10396800 |
| C    | 0.22011600  | 2.69040700 | -1.85050500 |
| C    | 0.63436300  | 4.08771500 | -4.27805600 |
| H    | 0.80295200  | 4.62347100 | -5.21616100 |
| C    | 0.06127900  | 2.81393800 | -4.28566100 |
| H    | -0.22482900 | 2.34861100 | -5.23315100 |
| C    | 1.49192400  | 0.99223500 | -0.26167700 |
| C    | -0.43052300 | 2.76805800 | 1.99573800  |

|   |             |             |             |
|---|-------------|-------------|-------------|
| C | -1.25934400 | 1.01825700  | -0.42164400 |
| C | -0.62569500 | 1.46430600  | 2.49126300  |
| H | -0.34625800 | 0.60676600  | 1.88320500  |
| C | -1.15886800 | 1.25318400  | 3.75934300  |
| H | -1.29775100 | 0.22627500  | 4.10829900  |
| C | -1.49935900 | 2.32430500  | 4.58482700  |
| H | -1.91737600 | 2.15261800  | 5.57952800  |
| C | -0.76493300 | 3.84372400  | 2.84300900  |
| H | -0.60368300 | 4.85636600  | 2.47597900  |
| C | -1.28652400 | 3.62026100  | 4.11240100  |
| H | -1.54051200 | 4.47901300  | 4.74063000  |
| C | 1.88056200  | 0.05344500  | -1.23428400 |
| H | 1.26076900  | -0.07960400 | -2.12567800 |
| C | 3.04680100  | -0.69886800 | -1.12529900 |
| H | 3.33089400  | -1.41290400 | -1.90259800 |
| C | 3.87403700  | -0.53302600 | -0.01290500 |
| C | 3.52810700  | 0.39644700  | 0.96677700  |
| H | 4.17905000  | 0.52742600  | 1.83501200  |
| C | -2.48639200 | 1.70142400  | -0.35607800 |
| H | -2.47574300 | 2.79415900  | -0.30862900 |
| C | -1.32668100 | -0.38013000 | -0.48543500 |
| H | -0.40106500 | -0.96079100 | -0.52492600 |
| C | 2.36140300  | 1.14775600  | 0.82923200  |
| H | 2.11719400  | 1.88172600  | 1.60136800  |
| C | -3.70681100 | 1.03761300  | -0.32787000 |
| H | -4.64766800 | 1.59018700  | -0.26595900 |
| C | -2.54006900 | -1.06900100 | -0.44896200 |
| H | -2.56662700 | -2.16158100 | -0.46770200 |
| C | -3.73513000 | -0.35867500 | -0.36249900 |
| C | 6.35806700  | -0.80457700 | 0.07014900  |
| C | 5.13145600  | -2.67114100 | 0.29451300  |
| C | 6.78709100  | 0.51490100  | -0.11127800 |
| C | 7.27819100  | -1.86896000 | 0.22725100  |
| C | 4.08528100  | -3.59296600 | 0.41186800  |
| C | 6.48657500  | -3.07384800 | 0.37138300  |
| C | 8.15601100  | 0.75047300  | -0.12405300 |
| H | 6.06447600  | 1.32294200  | -0.23704000 |
| C | 8.65185300  | -1.60331700 | 0.21095400  |
| C | 4.42077400  | -4.92786900 | 0.59950700  |
| H | 3.04594700  | -3.26490500 | 0.35711100  |
| C | 6.79645200  | -4.42505200 | 0.56056500  |
| C | 9.08430100  | -0.29412600 | 0.03701900  |
| H | 8.51786400  | 1.77197700  | -0.26359200 |
| H | 9.37244600  | -2.41591100 | 0.33198700  |
| C | 5.76179100  | -5.34621900 | 0.67200000  |
| H | 3.62277200  | -5.66820300 | 0.69438400  |
| H | 7.83842100  | -4.74880800 | 0.62127800  |
| H | 10.15348900 | -0.07126600 | 0.02296200  |



|   |             |             |             |
|---|-------------|-------------|-------------|
| H | 5.98846600  | -6.40444400 | 0.81952800  |
| C | -5.57066700 | -1.79100500 | -1.28363600 |
| C | -5.79297900 | -1.09312700 | 0.83865700  |
| C | -5.12066300 | -2.02307200 | -2.58791000 |
| C | -6.79455000 | -2.32684700 | -0.81391100 |
| C | -5.59296300 | -0.50668100 | 2.09348500  |
| C | -6.93795700 | -1.87558500 | 0.55580700  |
| C | -5.91573900 | -2.80809300 | -3.41354400 |
| H | -4.17698900 | -1.59792500 | -2.93398400 |
| C | -7.57557700 | -3.11419500 | -1.66681900 |
| C | -6.56968200 | -0.71190100 | 3.05957400  |
| H | -4.69991900 | 0.08732900  | 2.29747200  |
| C | -7.90629400 | -2.06527400 | 1.54812600  |
| C | -7.13175500 | -3.35234700 | -2.96235800 |
| H | -5.58766700 | -3.00526000 | -4.43701700 |
| H | -8.52189400 | -3.53427900 | -1.31720100 |
| C | -7.71792900 | -1.48064100 | 2.79469900  |
| H | -6.43969200 | -0.26525600 | 4.04818300  |
| H | -8.79583700 | -2.66635900 | 1.34400300  |
| H | -7.73095100 | -3.96585000 | -3.63882700 |
| H | -8.46530400 | -1.61931600 | 3.57910600  |
| N | 5.06792300  | -1.30164600 | 0.11296300  |
| N | -4.97891900 | -1.04898700 | -0.27918300 |

Compound **6Ph<sup>-</sup>** @  $\omega$ B97XD / def2-SVP

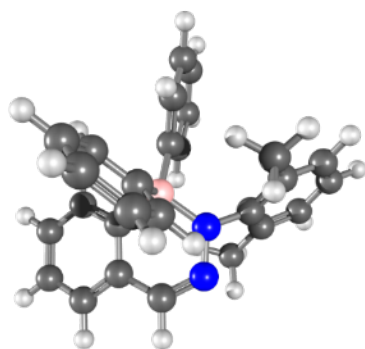

-1 1

|   |             |             |             |
|---|-------------|-------------|-------------|
| C | -1.23891200 | 1.77661300  | -1.92147400 |
| H | -1.58917600 | 2.35238900  | -2.78660900 |
| N | 0.38022100  | 0.39882800  | -1.09208600 |
| B | -0.51730300 | -0.07885500 | 0.12347600  |
| N | -0.11249900 | 1.16276900  | -2.08595300 |
| C | -1.91318800 | 1.95705300  | -0.63830800 |
| C | -2.87404200 | 2.96826100  | -0.47559400 |
| H | -3.18807400 | 3.55691600  | -1.34416400 |

|   |             |             |             |
|---|-------------|-------------|-------------|
| C | -2.01494400 | 1.50101000  | 1.72113500  |
| H | -1.67737100 | 0.93165600  | 2.59344000  |
| C | -1.48648400 | 1.18573800  | 0.46334500  |
| C | -3.41203400 | 3.23456200  | 0.77932300  |
| H | -4.16614500 | 4.01779100  | 0.89942300  |
| C | -2.97230700 | 2.50275900  | 1.88585500  |
| H | -3.38515700 | 2.70987300  | 2.87769300  |
| C | -1.55339800 | -1.27514800 | -0.34128800 |
| C | 1.79226500  | 0.27668200  | -1.14056800 |
| C | 0.43707200  | -0.48379400 | 1.39381300  |
| C | 2.41540600  | -0.98174300 | -1.26567900 |
| C | 3.81148100  | -1.05393500 | -1.24332900 |
| H | 4.29026000  | -2.03321200 | -1.33642100 |
| C | 4.59367300  | 0.08963200  | -1.12056300 |
| H | 5.68406500  | 0.01310400  | -1.10257900 |
| C | 2.58101100  | 1.44267400  | -1.01935500 |
| C | 3.97396200  | 1.33041100  | -1.01778000 |
| H | 4.57940700  | 2.23567300  | -0.91061200 |
| C | -2.41064200 | -1.88188500 | 0.59458000  |
| H | -2.34092400 | -1.58304600 | 1.64590600  |
| C | -3.35043800 | -2.84600700 | 0.23300100  |
| H | -3.98994600 | -3.29904500 | 0.99694800  |
| C | -3.48134600 | -3.22865300 | -1.10317300 |
| H | -4.21861400 | -3.98197200 | -1.39573300 |
| C | -2.66404800 | -2.62737200 | -2.05886200 |
| H | -2.76237600 | -2.90380100 | -3.11329700 |
| C | 1.20177000  | 0.50807300  | 2.03488300  |
| H | 1.12134100  | 1.54137500  | 1.68582500  |
| C | 0.57467800  | -1.78521700 | 1.89998400  |
| H | -0.00381700 | -2.59608700 | 1.44744400  |
| C | -1.72136500 | -1.67001100 | -1.67753900 |
| H | -1.09515900 | -1.20488900 | -2.44346400 |
| C | 2.05923200  | 0.22498400  | 3.09535900  |
| H | 2.64096300  | 1.02908900  | 3.55553200  |
| C | 1.42711600  | -2.08820400 | 2.96484800  |
| H | 1.50493500  | -3.11944300 | 3.32239000  |
| C | 2.17874000  | -1.08281800 | 3.56815000  |
| H | 2.85140400  | -1.31378100 | 4.39915900  |
| C | 1.60813700  | -2.23173400 | -1.47277400 |
| H | 0.91700200  | -2.41705700 | -0.64099000 |
| H | 0.98690000  | -2.14774000 | -2.37606100 |
| H | 2.26450800  | -3.10772400 | -1.57908500 |
| C | 1.93903500  | 2.79534700  | -0.85671400 |
| H | 1.55986800  | 3.17483600  | -1.81750500 |
| H | 1.06813800  | 2.74211200  | -0.18603200 |
| H | 2.65783600  | 3.52241100  | -0.44998200 |

Compound **7Ph<sup>-</sup>** @  $\omega$ B97XD / def2-SVP

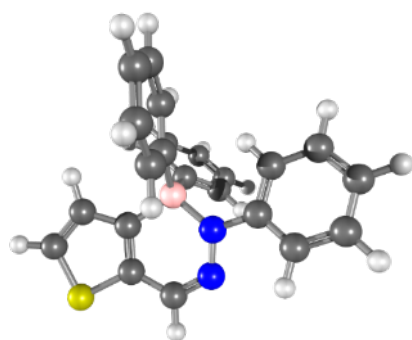

-1 1

|   |             |             |             |
|---|-------------|-------------|-------------|
| B | -0.35396900 | 0.02862100  | 0.10650000  |
| N | 0.50568100  | -0.14758100 | -1.22823500 |
| N | -0.01544400 | -0.27442200 | -2.46497800 |
| C | -1.27137000 | -0.49255800 | -2.64566800 |
| H | -1.59722600 | -0.57690400 | -3.68789700 |
| C | -2.20435900 | -0.68808300 | -1.55814700 |
| C | -1.83780600 | -0.52760700 | -0.24609200 |
| C | -2.91825600 | -0.87523900 | 0.62663100  |
| H | -2.84351800 | -0.84695300 | 1.71578300  |
| C | -4.05633900 | -1.26341500 | -0.02734700 |
| H | -5.00830700 | -1.56988300 | 0.40477900  |
| S | -3.84729700 | -1.23402200 | -1.74155400 |
| C | 0.26144600  | -0.92786300 | 1.29804300  |
| C | 0.46367000  | -2.29083600 | 1.01810200  |
| H | 0.23853700  | -2.65505700 | 0.01052400  |
| C | 0.94568800  | -3.18394100 | 1.97197600  |
| H | 1.09473500  | -4.23566100 | 1.70936000  |
| C | 1.23936700  | -2.73921000 | 3.26268900  |
| H | 1.61727500  | -3.43497900 | 4.01732800  |
| C | 1.04912600  | -1.39428500 | 3.57167900  |
| H | 1.28130300  | -1.02565900 | 4.57563200  |
| C | 0.57064300  | -0.51024600 | 2.60061700  |
| H | 0.45196700  | 0.54461900  | 2.86570600  |
| C | -0.48589600 | 1.62156600  | 0.50032700  |
| C | -1.24862800 | 2.04857000  | 1.60293200  |
| H | -1.73380300 | 1.29981500  | 2.23691800  |
| C | -1.42256700 | 3.39637500  | 1.91579400  |
| H | -2.02341000 | 3.68171700  | 2.78485100  |
| C | -0.83695400 | 4.38083500  | 1.11879100  |
| H | -0.96891200 | 5.44011300  | 1.35738500  |
| C | -0.08856000 | 3.99136600  | 0.00912400  |
| H | 0.37035700  | 4.74864500  | -0.63374700 |
| C | 0.07655600  | 2.63736300  | -0.28906300 |
| H | 0.66035200  | 2.35705300  | -1.17047400 |
| C | 2.64994700  | -0.48909100 | -2.36624100 |
| H | 2.10751100  | -0.85940900 | -3.23429500 |

|   |            |             |             |
|---|------------|-------------|-------------|
| C | 1.90342700 | -0.07634300 | -1.24209000 |
| C | 2.62196300 | 0.41160600  | -0.13246200 |
| H | 2.08669300 | 0.76502500  | 0.74518900  |
| C | 4.01191000 | 0.46578100  | -0.14657400 |
| H | 4.53111600 | 0.85030300  | 0.73572700  |
| C | 4.74080500 | 0.05022500  | -1.26042900 |
| H | 5.83269000 | 0.09514100  | -1.26455100 |
| C | 4.03870800 | -0.42277000 | -2.36993900 |
| H | 4.58245200 | -0.75584300 | -3.25927400 |

Compound **5Ph[Me]** @  $\omega$ B97XD / def2-SVP

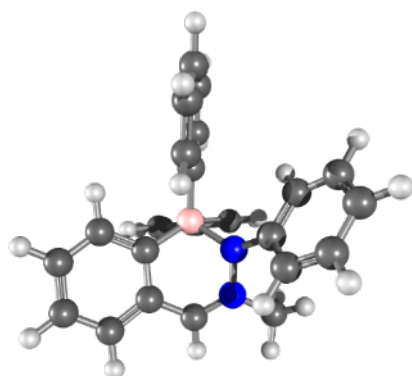

|     |             |             |             |
|-----|-------------|-------------|-------------|
| O 1 |             |             |             |
| N   | 0.41332800  | -0.65699200 | -0.82538400 |
| N   | -0.28530400 | -1.63681800 | -1.46403600 |
| C   | 1.81608400  | -0.78246900 | -0.90428400 |
| C   | 4.60962500  | -1.00028700 | -1.01954800 |
| H   | 5.69750300  | -1.08224700 | -1.06210600 |
| C   | 0.54639400  | 1.18559600  | 1.06451600  |
| C   | 0.51630100  | 2.58442900  | 0.97805500  |
| H   | -0.20219900 | 3.06282100  | 0.30680600  |
| C   | 1.38448900  | 3.38657900  | 1.72293300  |
| H   | 1.33475400  | 4.47464300  | 1.62949800  |
| C   | 2.31148900  | 2.80325100  | 2.58340700  |
| H   | 2.99428600  | 3.42712500  | 3.16560600  |
| C   | 1.48141800  | 0.62583800  | 1.95351800  |
| H   | 1.53650700  | -0.46289500 | 2.05560000  |
| C   | -2.04087000 | 2.32632800  | -2.74889200 |
| H   | -1.71801600 | 2.72406500  | -3.71494300 |
| C   | 2.43773200  | -2.03308600 | -0.78652700 |
| H   | 1.82633100  | -2.92387800 | -0.62110700 |
| C   | -1.52107100 | 1.06276000  | -0.71438900 |
| C   | 2.60810500  | 0.36008900  | -1.07719700 |
| H   | 2.12639500  | 1.33485800  | -1.15584100 |
| C   | -1.67899400 | -2.01976900 | 0.46826600  |
| C   | -1.21103400 | -0.85919200 | 1.12036700  |

|   |             |             |             |
|---|-------------|-------------|-------------|
| C | 3.82525100  | -2.14046000 | -0.85836900 |
| H | 4.29545100  | -3.12220700 | -0.76696800 |
| C | 3.99320800  | 0.24792400  | -1.12131800 |
| H | 4.59828000  | 1.14861700  | -1.24383400 |
| C | -1.15364500 | 1.58916000  | -1.96413500 |
| H | -0.13475400 | 1.42169400  | -2.33064900 |
| C | -2.80211100 | -2.79503900 | 2.45678600  |
| H | -3.42158200 | -3.52692100 | 2.97871300  |
| C | -2.83296000 | 1.31528900  | -0.28713600 |
| H | -3.16621600 | 0.92119200  | 0.67813200  |
| C | -3.73119000 | 2.05442600  | -1.05856500 |
| H | -4.74576600 | 2.23292200  | -0.69258800 |
| C | -1.53543000 | -0.72089100 | 2.47513400  |
| H | -1.17977800 | 0.15981400  | 3.01614500  |
| C | -2.48467400 | -2.97355200 | 1.12023100  |
| H | -2.84138000 | -3.85532500 | 0.58046700  |
| C | -1.31088100 | -2.22280600 | -0.90668300 |
| H | -1.87133200 | -2.90920200 | -1.54428700 |
| C | -2.32009500 | -1.66603500 | 3.13211300  |
| H | -2.57656500 | -1.51987100 | 4.18444900  |
| C | -0.00351600 | -1.82364100 | -2.88982500 |
| H | 1.07879900  | -1.88525600 | -3.04455900 |
| H | -0.40475900 | -0.95457700 | -3.42976200 |
| H | -0.47797900 | -2.74695700 | -3.24080000 |
| C | 2.35510700  | 1.41289600  | 2.69922400  |
| H | 3.07536800  | 0.94195800  | 3.37320800  |
| C | -3.33918500 | 2.56186100  | -2.29657900 |
| H | -4.04013200 | 3.13880900  | -2.90480600 |
| B | -0.43933500 | 0.23645900  | 0.19259000  |

Compound **8Ph<sup>-</sup>** @  $\omega$ B97XD / def2-SVP

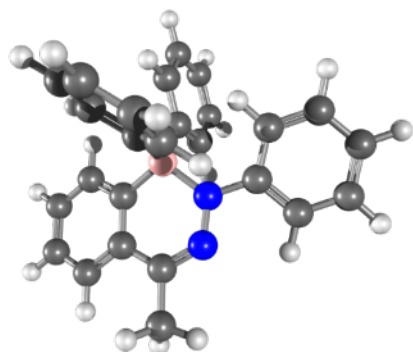

-1 1

|   |             |             |             |
|---|-------------|-------------|-------------|
| C | 1.08220700  | 0.62112900  | -2.72617200 |
| N | -0.59644400 | 0.29645000  | -1.19692300 |
| B | 0.38577600  | -0.02241000 | 0.00557300  |

|   |             |             |             |
|---|-------------|-------------|-------------|
| N | -0.15636200 | 0.72103500  | -2.39608000 |
| C | 2.12129000  | -0.05479700 | -1.95416900 |
| C | 3.37145200  | -0.33336300 | -2.52751600 |
| H | 3.58689900  | 0.01472000  | -3.54333100 |
| C | 2.76916100  | -1.24589100 | 0.02262300  |
| H | 2.53337800  | -1.63582600 | 1.01809500  |
| C | 1.80512500  | -0.48616200 | -0.65319300 |
| C | 4.32501700  | -1.05650900 | -1.81854800 |
| H | 5.30084000  | -1.26871400 | -2.26454500 |
| C | 4.01625200  | -1.52261100 | -0.53832300 |
| H | 4.75127100  | -2.10709000 | 0.02285800  |
| C | 0.65770600  | 1.35112600  | 0.87759300  |
| C | -1.98899800 | 0.35436300  | -1.08106000 |
| C | -0.18789400 | -1.28272200 | 0.89052800  |
| C | -2.62086700 | 0.39609500  | 0.17747900  |
| H | -2.01900200 | 0.40925800  | 1.08316000  |
| C | -4.00756400 | 0.43763500  | 0.28022700  |
| H | -4.45994900 | 0.46800100  | 1.27535700  |
| C | -4.81663600 | 0.45251500  | -0.85571600 |
| H | -5.90539400 | 0.48518600  | -0.76749100 |
| C | -2.81543500 | 0.37737500  | -2.22402300 |
| H | -2.33866000 | 0.35842300  | -3.20278400 |
| C | -4.20006100 | 0.42775700  | -2.10754200 |
| H | -4.80873800 | 0.44016100  | -3.01681600 |
| C | 1.61546600  | 1.39501800  | 1.90735300  |
| H | 2.19044000  | 0.49289900  | 2.13794800  |
| C | 1.87556100  | 2.55317800  | 2.63890200  |
| H | 2.62830000  | 2.53898300  | 3.43316500  |
| C | 1.18465200  | 3.73161300  | 2.35312300  |
| H | 1.38481800  | 4.64488400  | 2.92088200  |
| C | 0.24373000  | 3.72712300  | 1.32513900  |
| H | -0.29988000 | 4.64388200  | 1.07732100  |
| C | -0.60450500 | -2.44568400 | 0.21847600  |
| H | -0.57708900 | -2.45415400 | -0.87581800 |
| C | -0.24798800 | -1.32009900 | 2.29087800  |
| H | 0.04758200  | -0.43482700 | 2.86145500  |
| C | -0.00775100 | 2.55710700  | 0.60513000  |
| H | -0.74356500 | 2.58445900  | -0.20325100 |
| C | -1.05735100 | -3.57493300 | 0.89559900  |
| H | -1.37947800 | -4.45624700 | 0.33281600  |
| C | -0.69383100 | -2.44812200 | 2.98616400  |
| H | -0.72712800 | -2.43448100 | 4.07995600  |
| C | -1.10220000 | -3.58410400 | 2.29153800  |
| H | -1.45609900 | -4.46796500 | 2.82996600  |
| C | 1.43416414  | 1.16111688  | -4.12479248 |

|   |            |            |             |
|---|------------|------------|-------------|
| H | 2.31300091 | 1.76823913 | -4.06195531 |
| H | 1.61361145 | 0.34148902 | -4.78880215 |
| H | 0.62042156 | 1.74880874 | -4.49538836 |

## 5 References

- 1 G. R. Fulmer, A. J. M. Miller, N. H. Sherden, H. E. Gottlieb, A. Nudelman, B. M. Stoltz, J. E. Bercaw and K. I. Goldberg, *Organometallics*, 2010, **29**, 2176-2179.
- 2 G. Sheldrick, *Acta Cryst.*, 2015, **A71**, 3-8.
- 3 G. Sheldrick, *Acta Cryst.*, 2008, **A64**, 112-122.
- 4 C. Pampillón, J. Claffey, M. Hogan and M. Tacke, *BioMetals*, 2008, **21**, 197-204.
- 5 L. Wüst, J. Chorbacher, T. Wellnitz, S. Nees, H. Helten and H. Braunschweig, *Chem. Sci.*, 2025, **16**, 7284-7293.
- 6 J. P. M. António, J. I. Carvalho, A. S. André, J. N. R. Dias, S. I. Aguiar, H. Faustino, R. M. R. M. Lopes, L. F. Veiros, G. J. L. Bernardes, F. A. da Silva and P. M. P. Gois, *Angew. Chem. Int. Ed.*, 2021, **60**, 25914-25921.
- 7 D. Chen, G. Xu, Q. Zhou, L. W. Chung and W. Tang, *J. Am. Chem. Soc.*, 2017, **139**, 9767-9770.
- 8 M. J. Frisch, G. W. Trucks, H. B. Schlegel, G. E. Scuseria, M. A. Robb, J. R. Cheeseman, G. Scalmani, V. Barone, G. A. Petersson, H. Nakatsuji, X. Li, M. Caricato, A. V. Marenich, J. Bloino, B. G. Janesko, R. Gomperts, B. Mennucci, H. P. Hratchian, J. V. Ortiz, A. F. Izmaylov, J. L. Sonnenberg, Williams, F. Ding, F. Lipparini, F. Egidi, J. Goings, B. Peng, A. Petrone, T. Henderson, D. Ranasinghe, V. G. Zakrzewski, J. Gao, N. Rega, G. Zheng, W. Liang, M. Hada, M. Ehara, K. Toyota, R. Fukuda, J. Hasegawa, M. Ishida, T. Nakajima, Y. Honda, O. Kitao, H. Nakai, T. Vreven, K. Throssell, J. A. Montgomery Jr., J. E. Peralta, F. Ogliaro, M. J. Bearpark, J. J. Heyd, E. N. Brothers, K. N. Kudin, V. N. Staroverov, T. A. Keith, R. Kobayashi, J. Normand, K. Raghavachari, A. P. Rendell, J. C. Burant, S. S. Iyengar, J. Tomasi, M. Cossi, J. M. Millam, M. Klene, C. Adamo, R. Cammi, J. W. Ochterski, R. L. Martin, K. Morokuma, O. Farkas, J. B. Foresman and D. J. Fox, Gaussian Inc. Wallingford CT, 2019.
- 9 J.-D. Chai and M. Head-Gordon, *Phys. Chem. Chem. Phys.*, 2008, **10**, 6615-6620.
- 10 F. Weigend and R. Ahlrichs, *Phys. Chem. Chem. Phys.*, 2005, **7**, 3297-3305.
- 11 E. D. Glendening, J. K. Badenhoop, A. E. Reed, J. E. Carpenter, J. A. Bohmann, C. M. Morales, P. Karafiloglou, C. R. Landis and F. Weinhold, *NBO 7.0*, University of Wisconsin, Madison, WI, 2018.
- 12 A. Gilber, *iQMol Molecular Viewer v2.13*, 2019.
- 13 A. D. Boese and N. C. Handy, *J. Chem. Phys.*, 2002, **116**, 9559-9569.
- 14 F. Weigend, *Phys. Chem. Chem. Phys.*, 2006, **8**, 1057-1065.
- 15 T. Lu and F. Chen, *J. Comput. Chem.*, 2012, **33**, 580-592.
